# Supplementary material for: A mild tetradehydro-Diels–Alder reaction of aryldiyne compounds affords exclusively linear products
Source: Royal Society of Chemistry journal article supplement (doi:10.1039/d2ob00121g), 2022-01-01
Supplement: d2ob00121g1.pdf [file d2ob00121g1.pdf]

## Supporting Information

### **Affording Linear Naphthalene Exclusively *via* Mild Aromatic Tetradehydro-Diels-Alder Reaction**

Yuling Lu, Xianxian Duan, Xia Chen, Meng Yao, Chunmei Chen, Hucheng Zhu, Zengwei Luo,\* and Yonghui Zhang\*

Hubei Key Laboratory of Natural Medicinal Chemistry and Resource Evaluation, School of Pharmacy, Tongji Medical College, Huazhong University of Science and Technology, Wuhan  
430030, China

Email: luozengwei@hust.edu.cn; zhangyh@mails.tjmu.edu.cn

## Characterization Data for Products:

The original graphics are shown below:

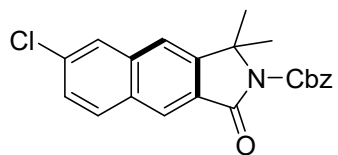

**3ag**

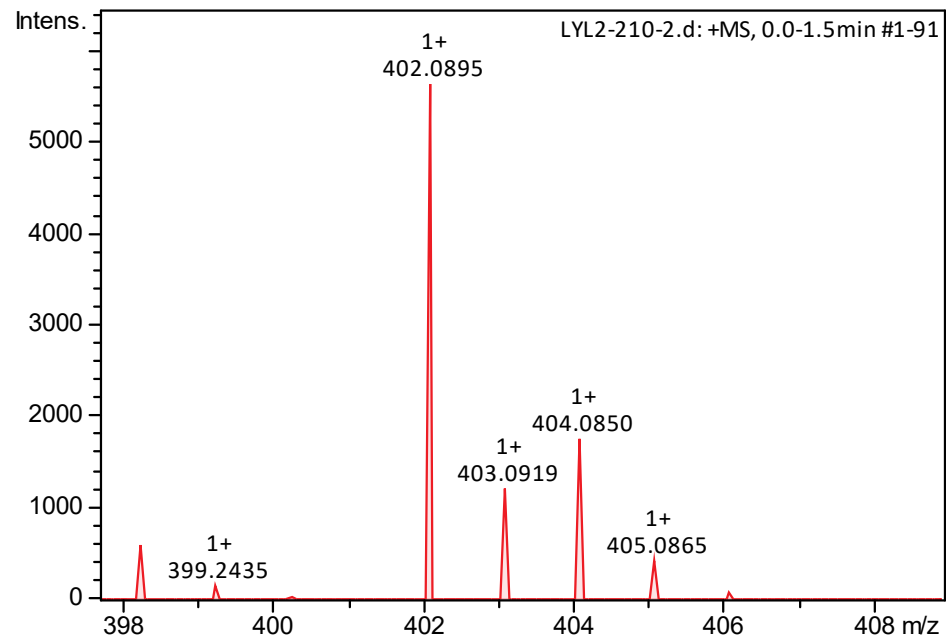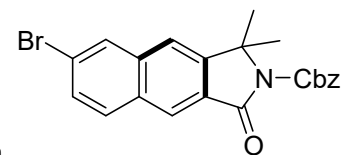

**3ah**

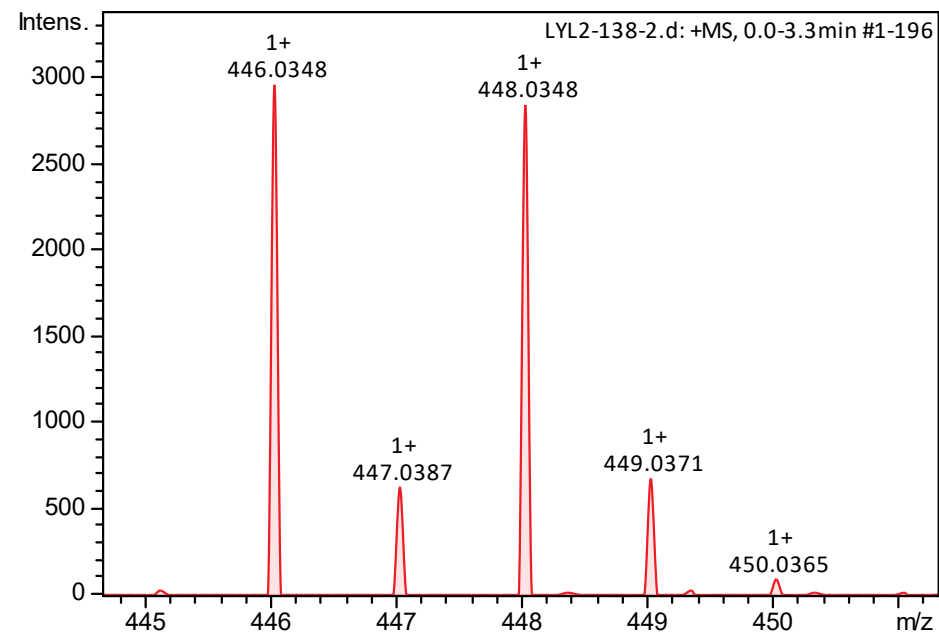

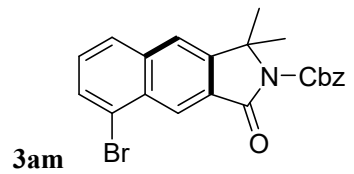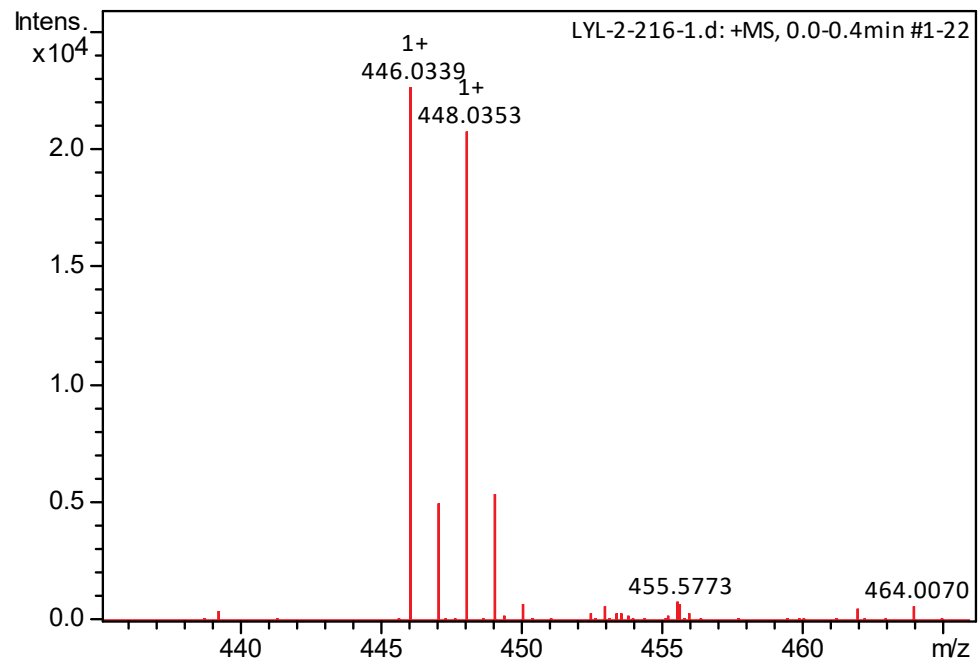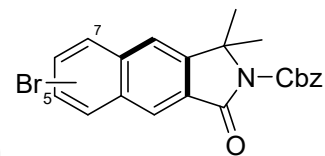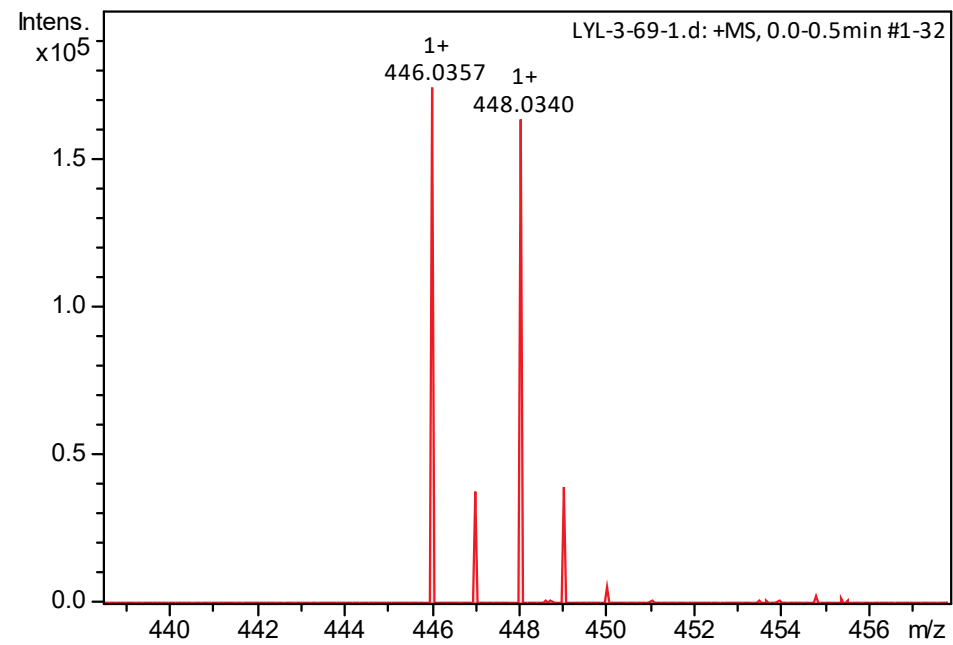

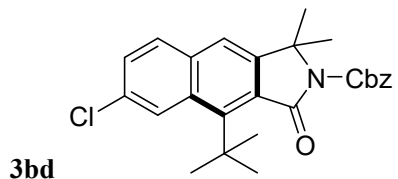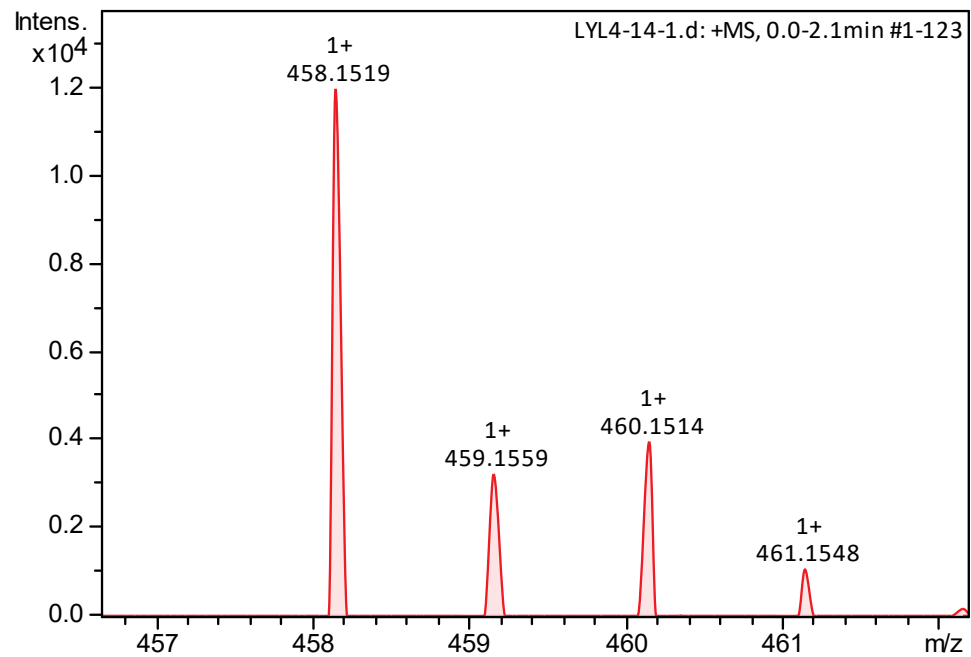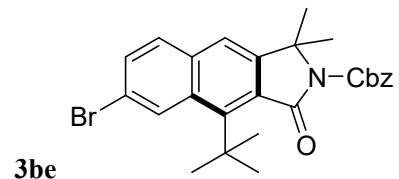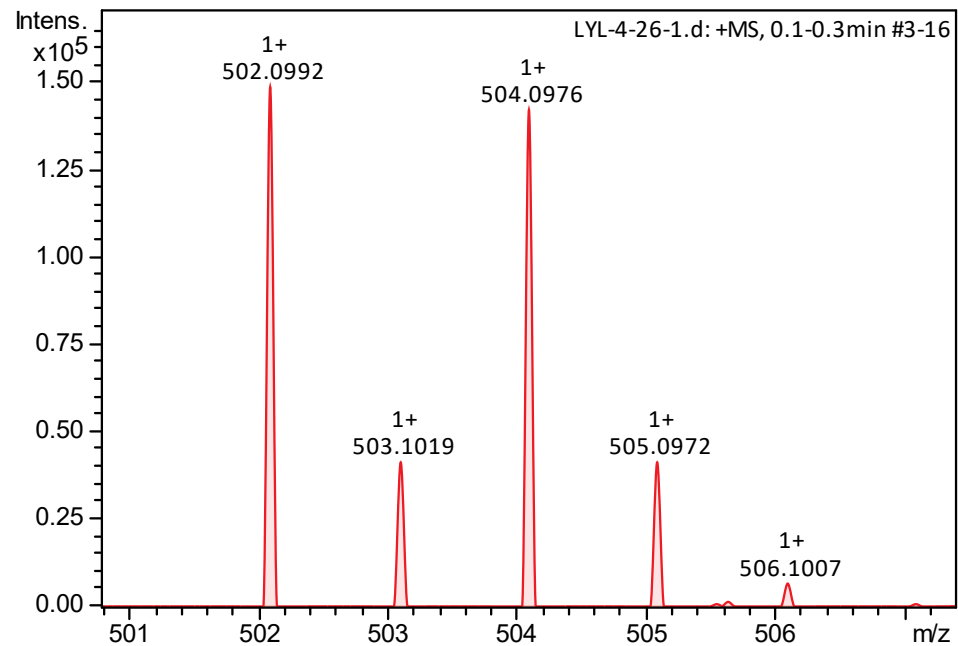

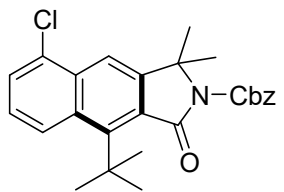

3bh

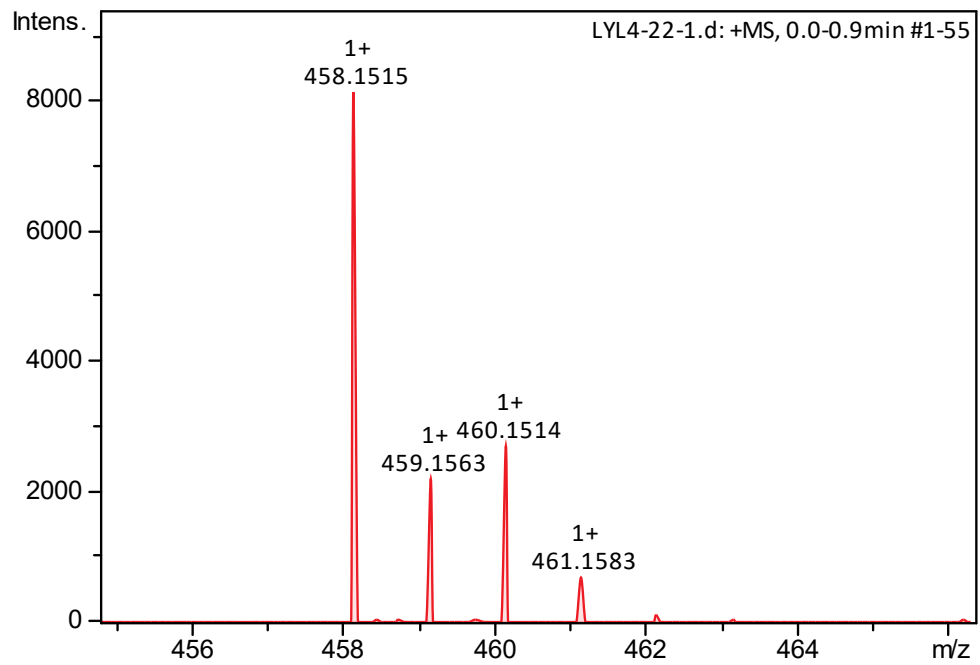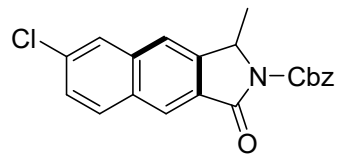

3bw

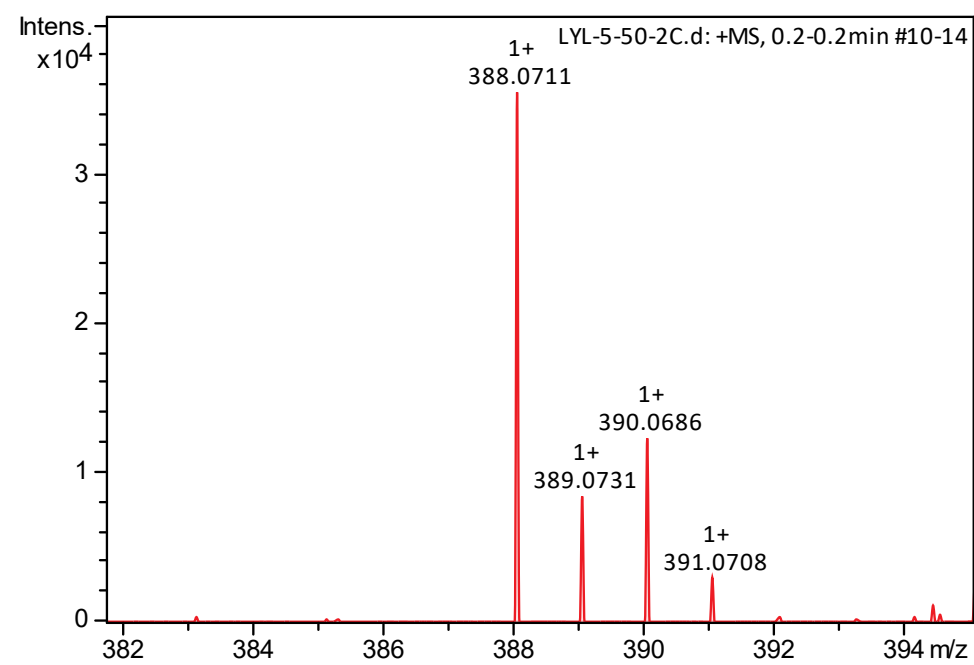

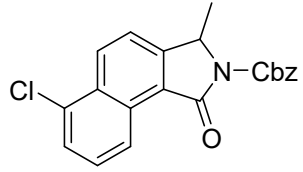

3bw

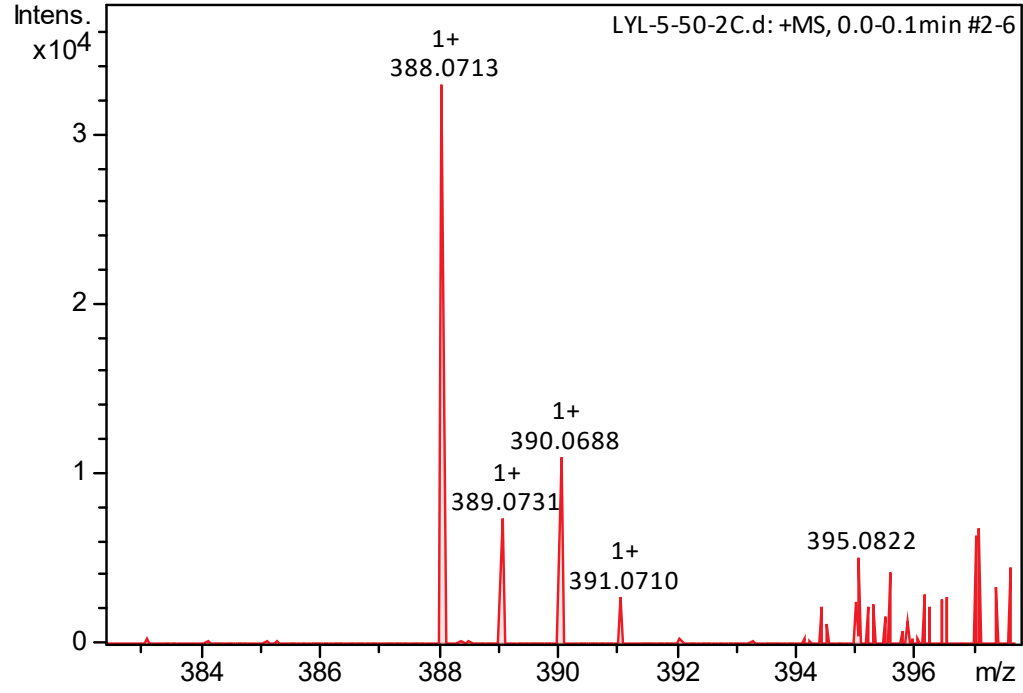

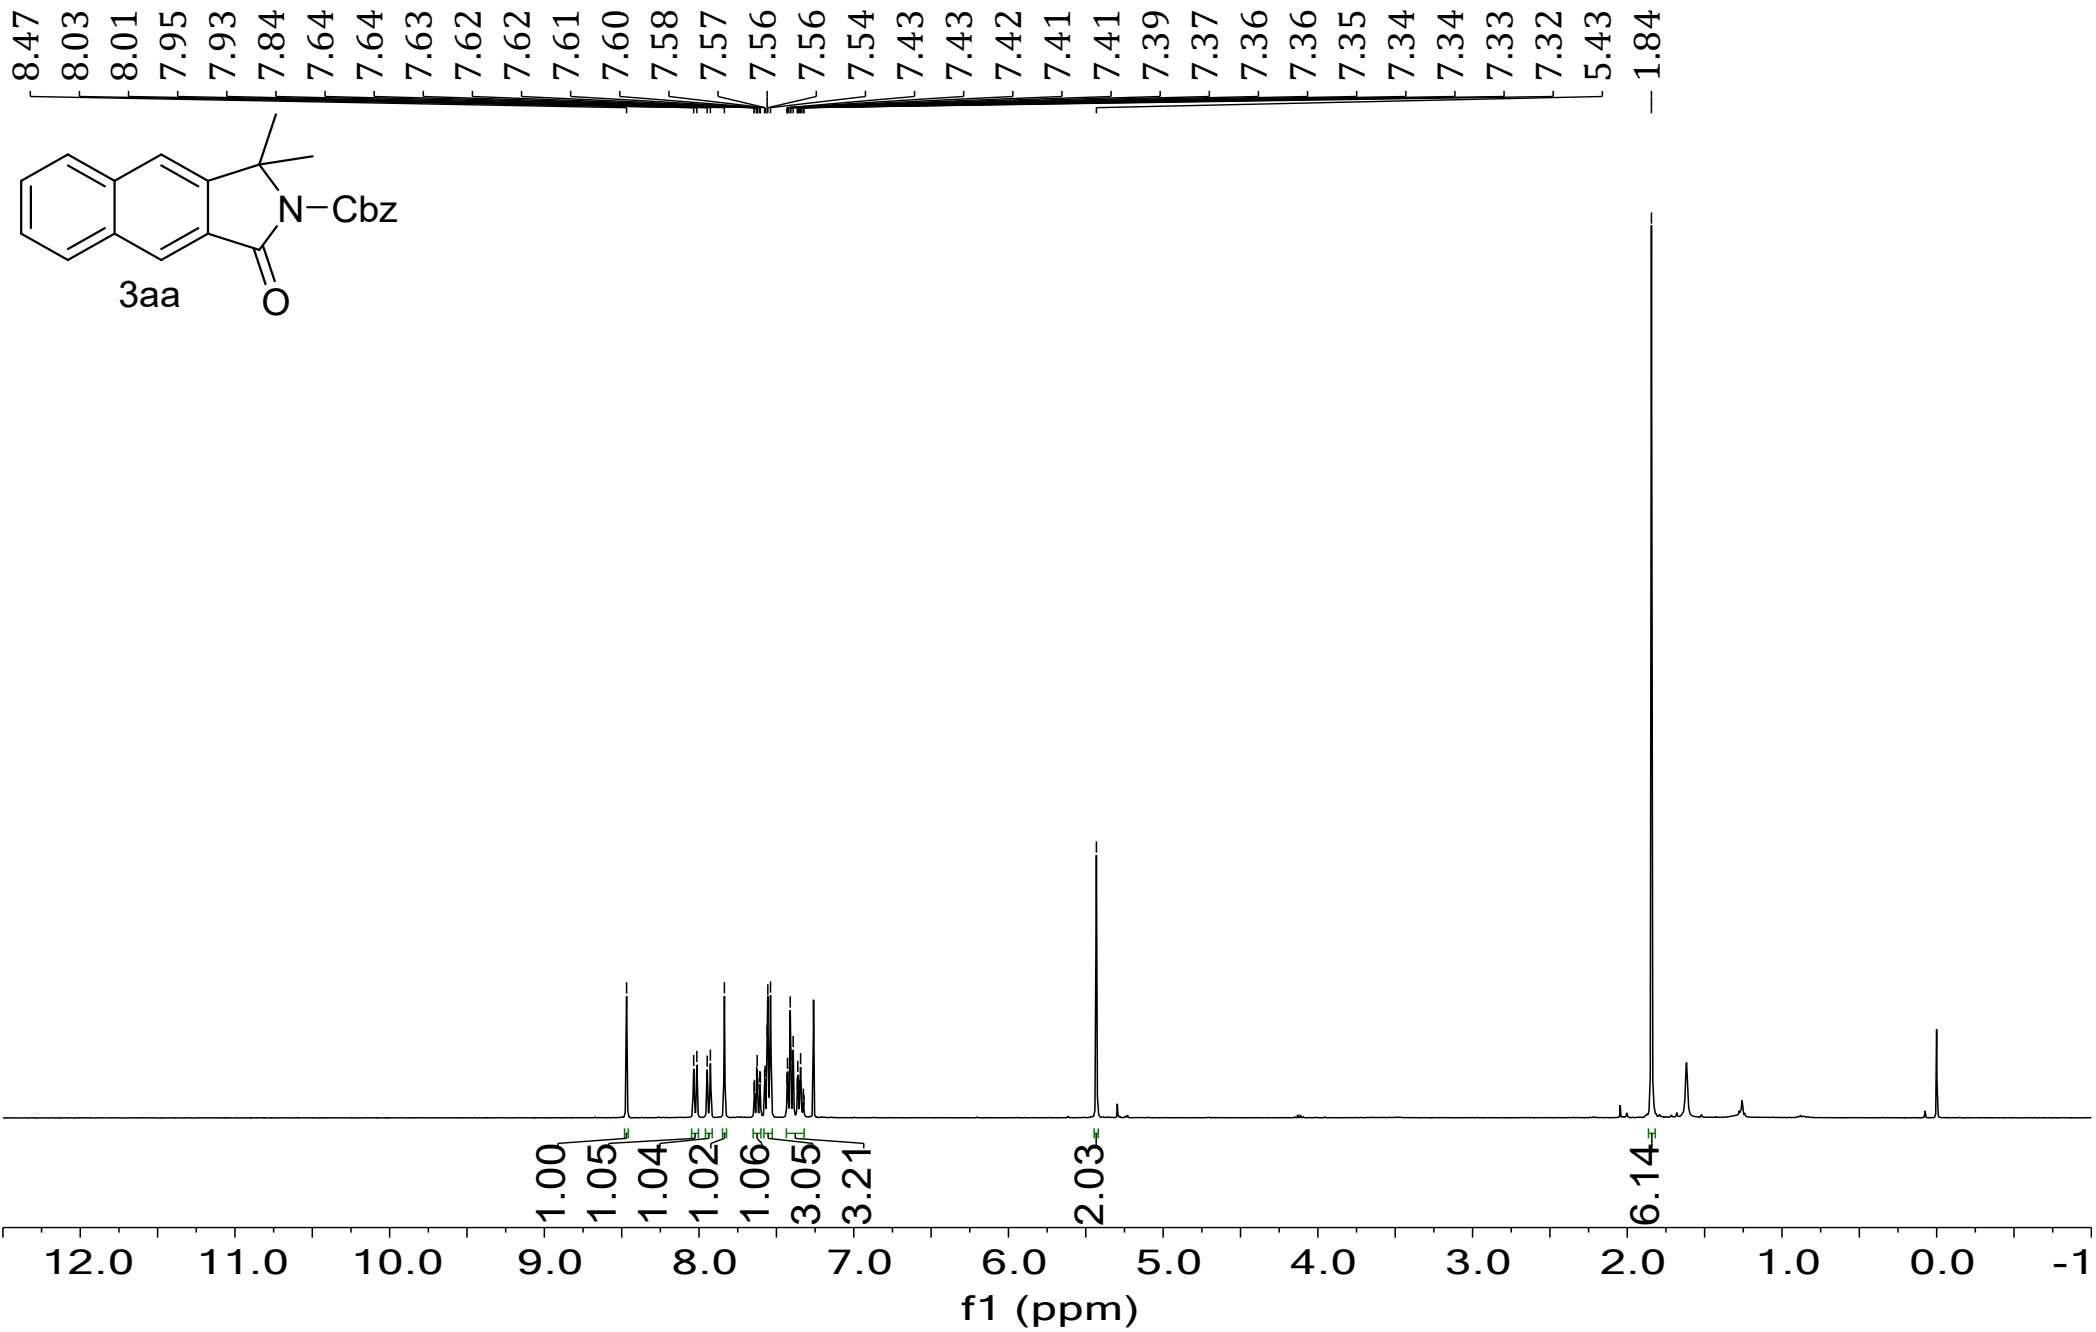

<sup>1</sup>H NMR (400 MHz, CDCl<sub>3</sub>) spectra of **3aa**

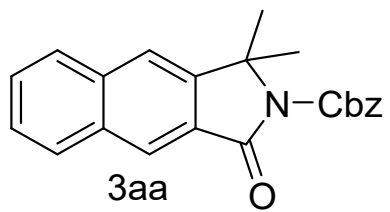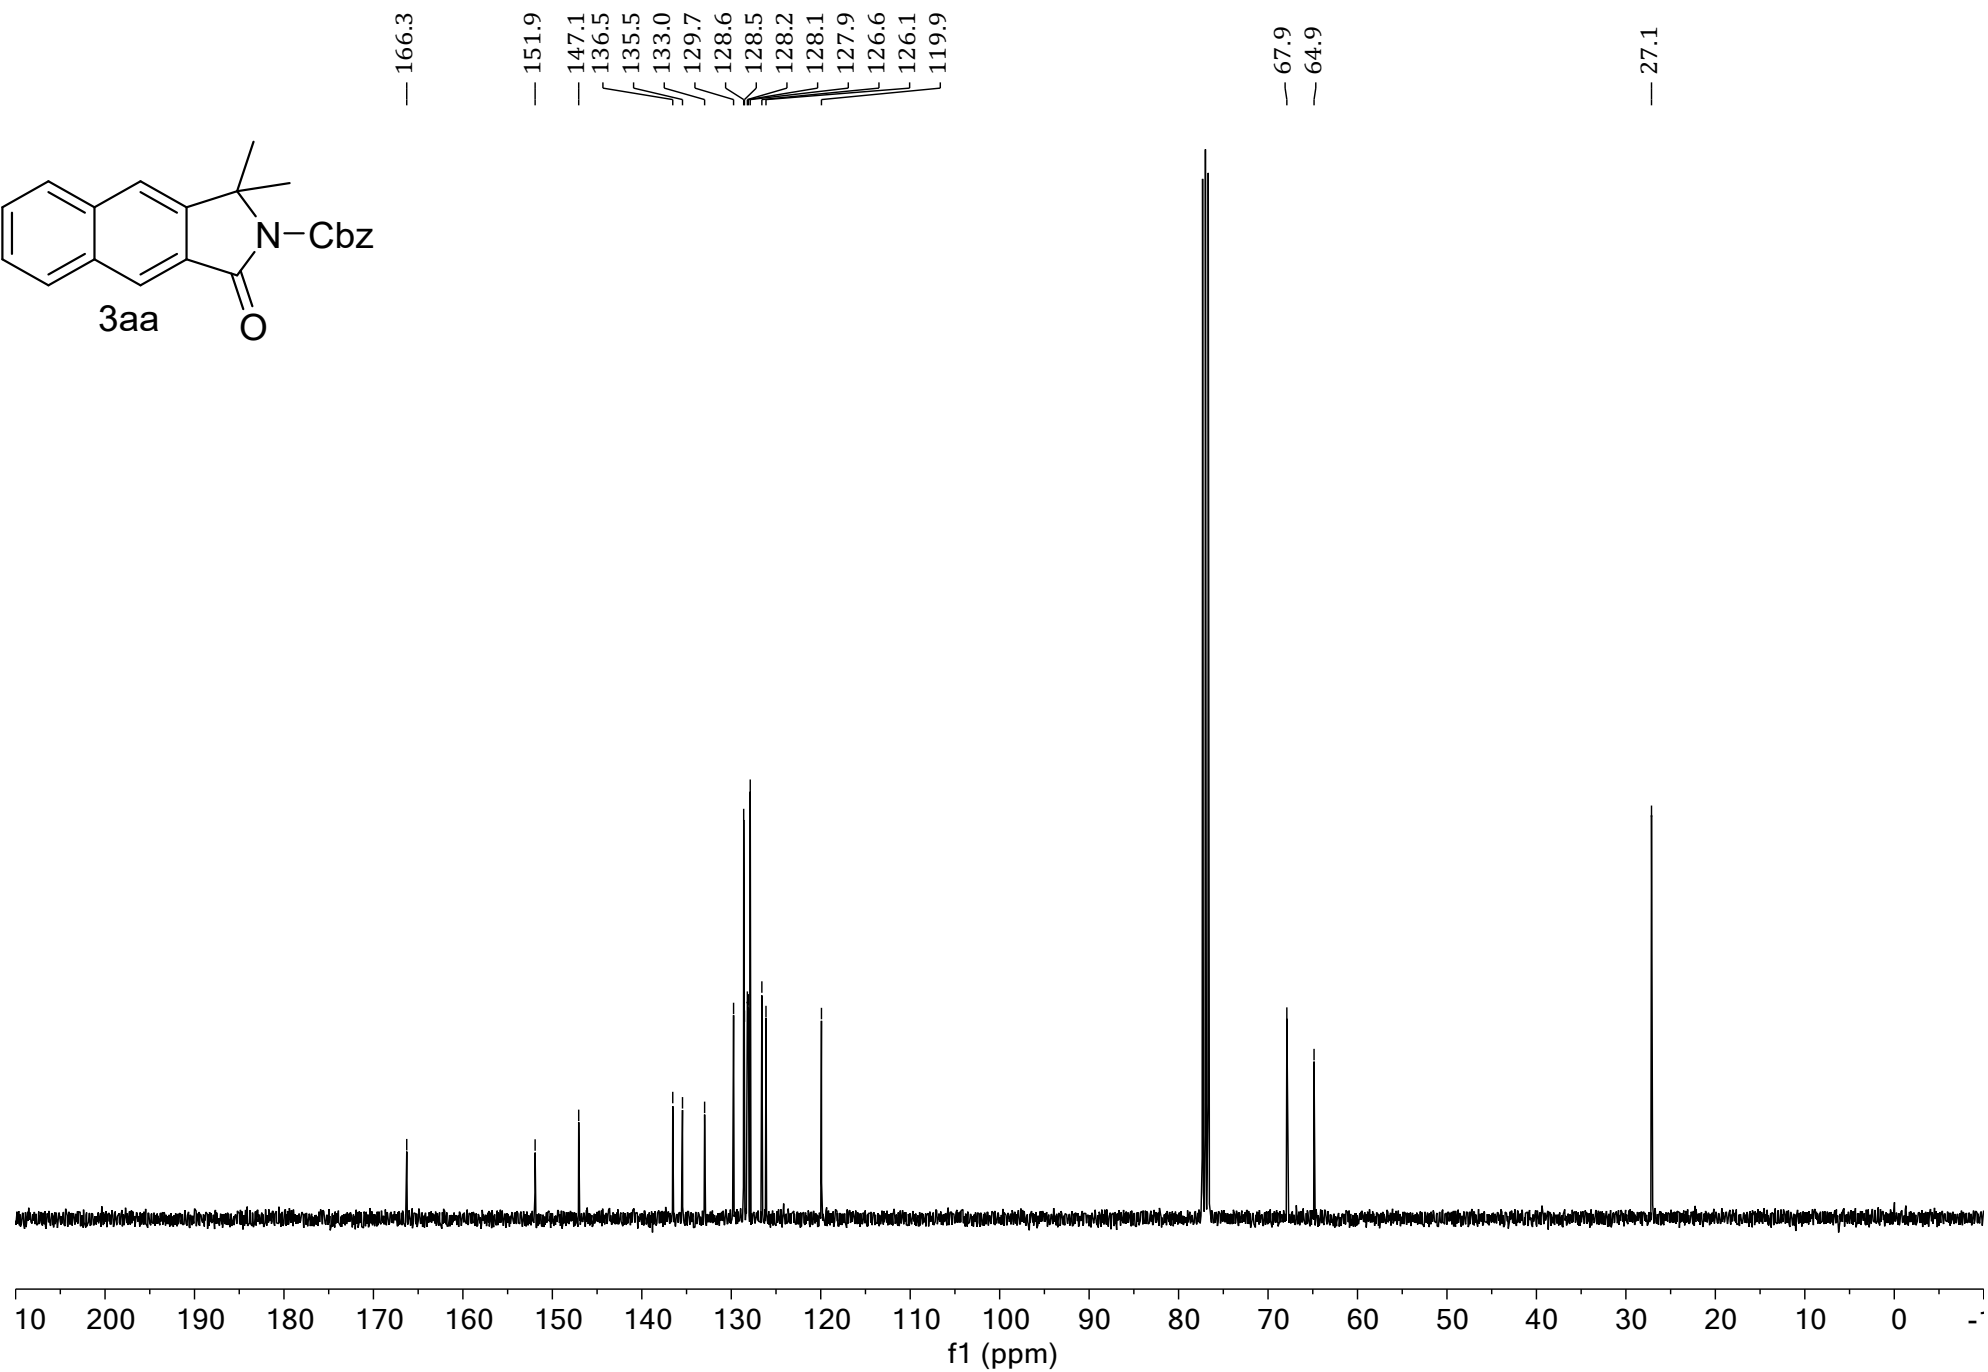

<sup>13</sup>C NMR (100 MHz, CDCl<sub>3</sub>) spectra of **3aa**



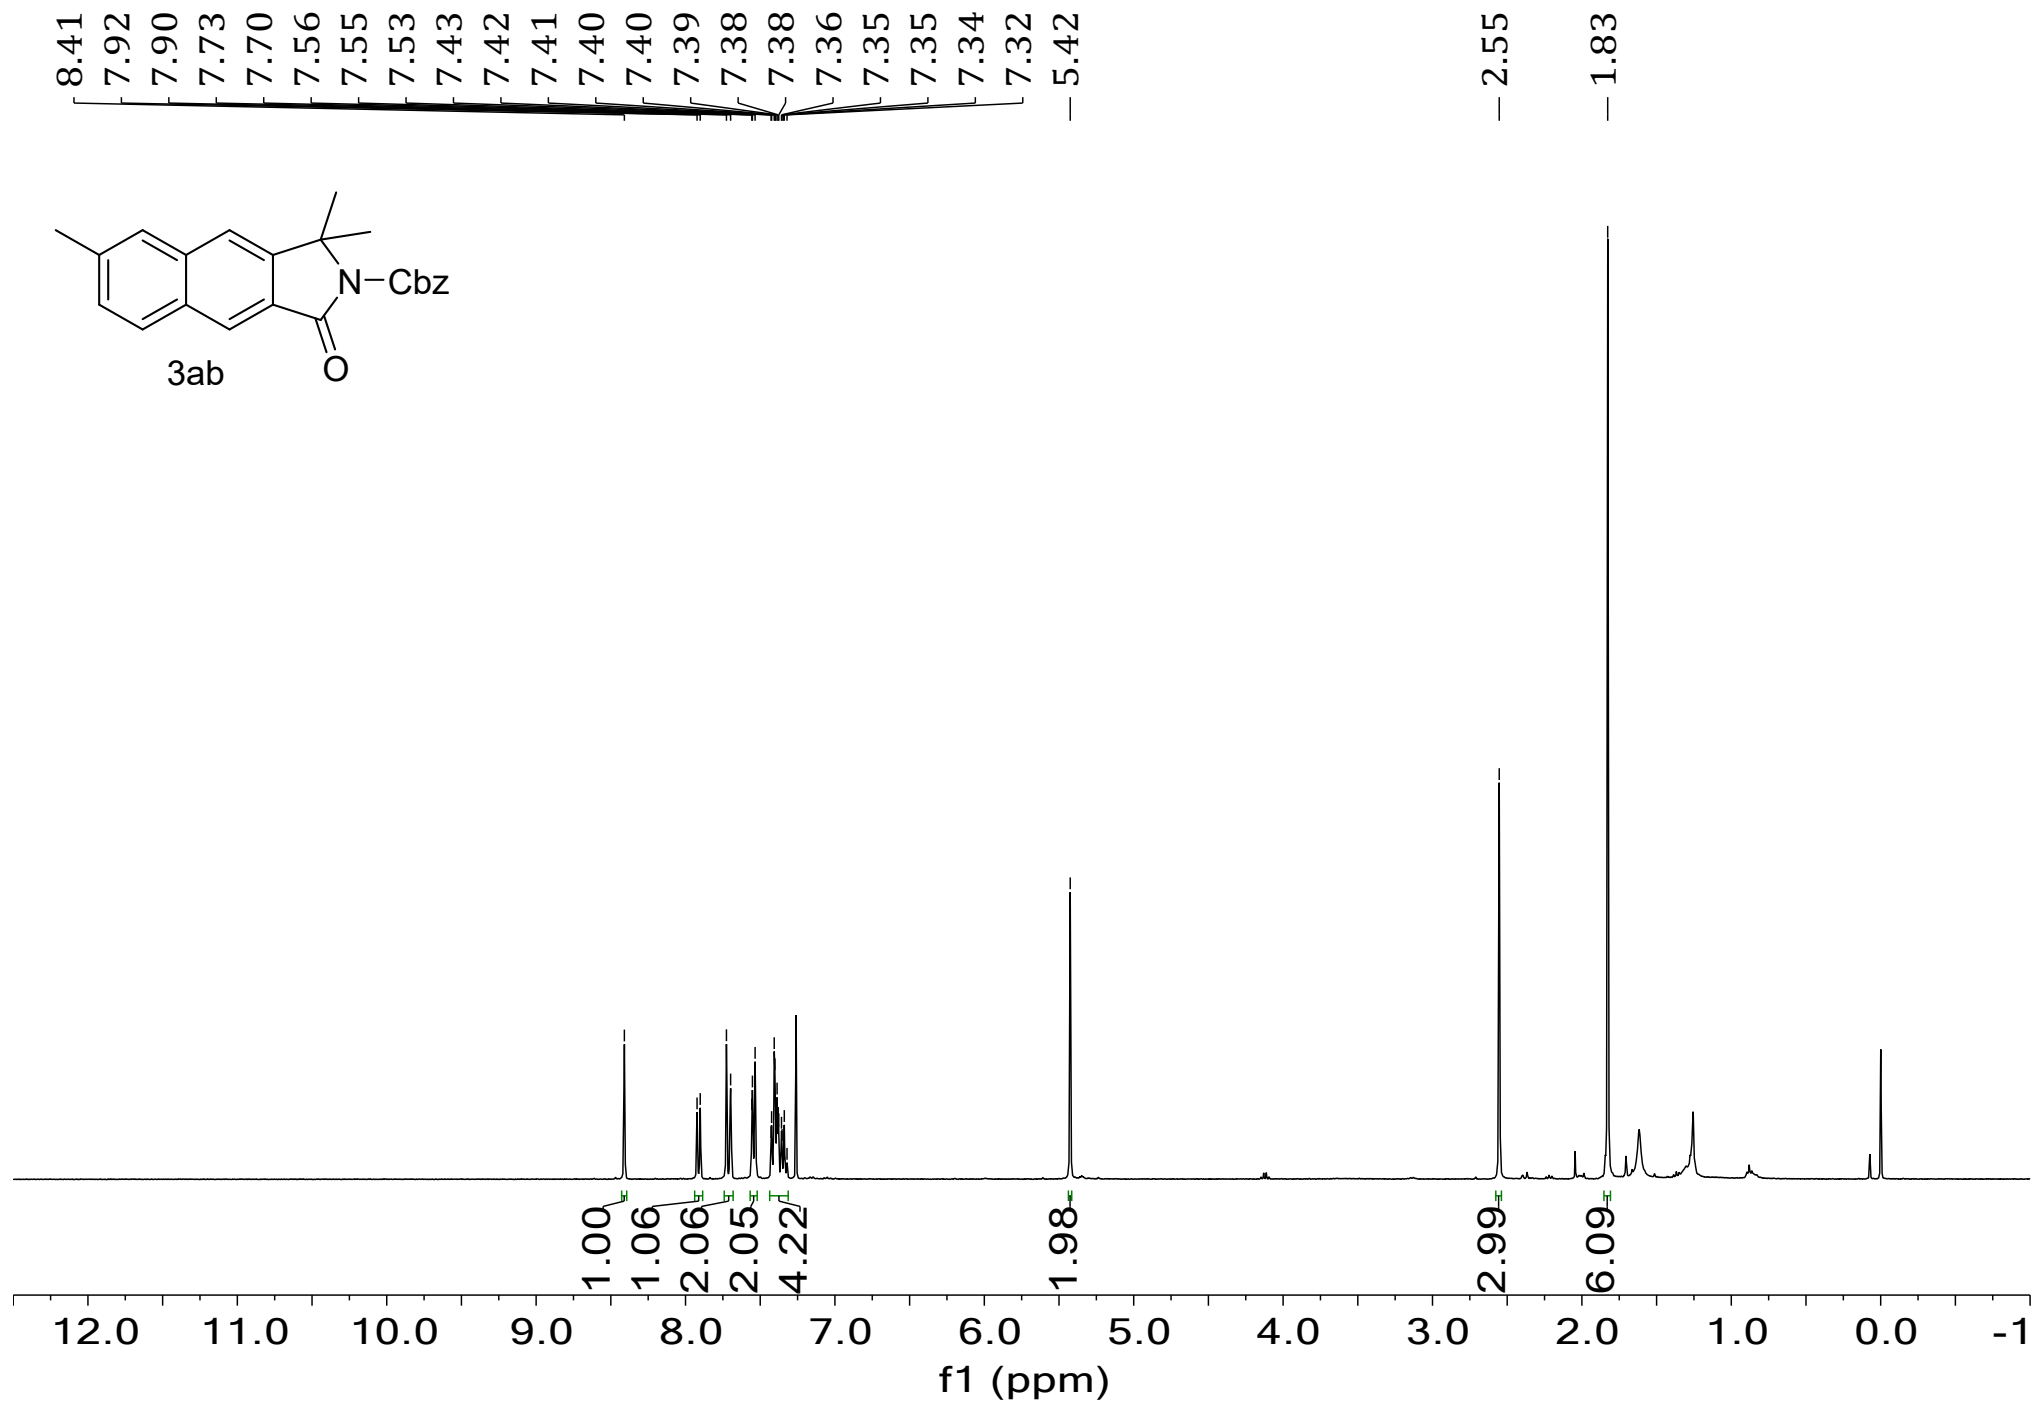

<sup>1</sup>H NMR (400 MHz, CDCl<sub>3</sub>) spectra of **3ab**.

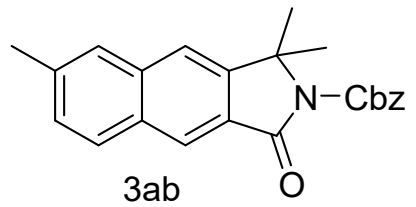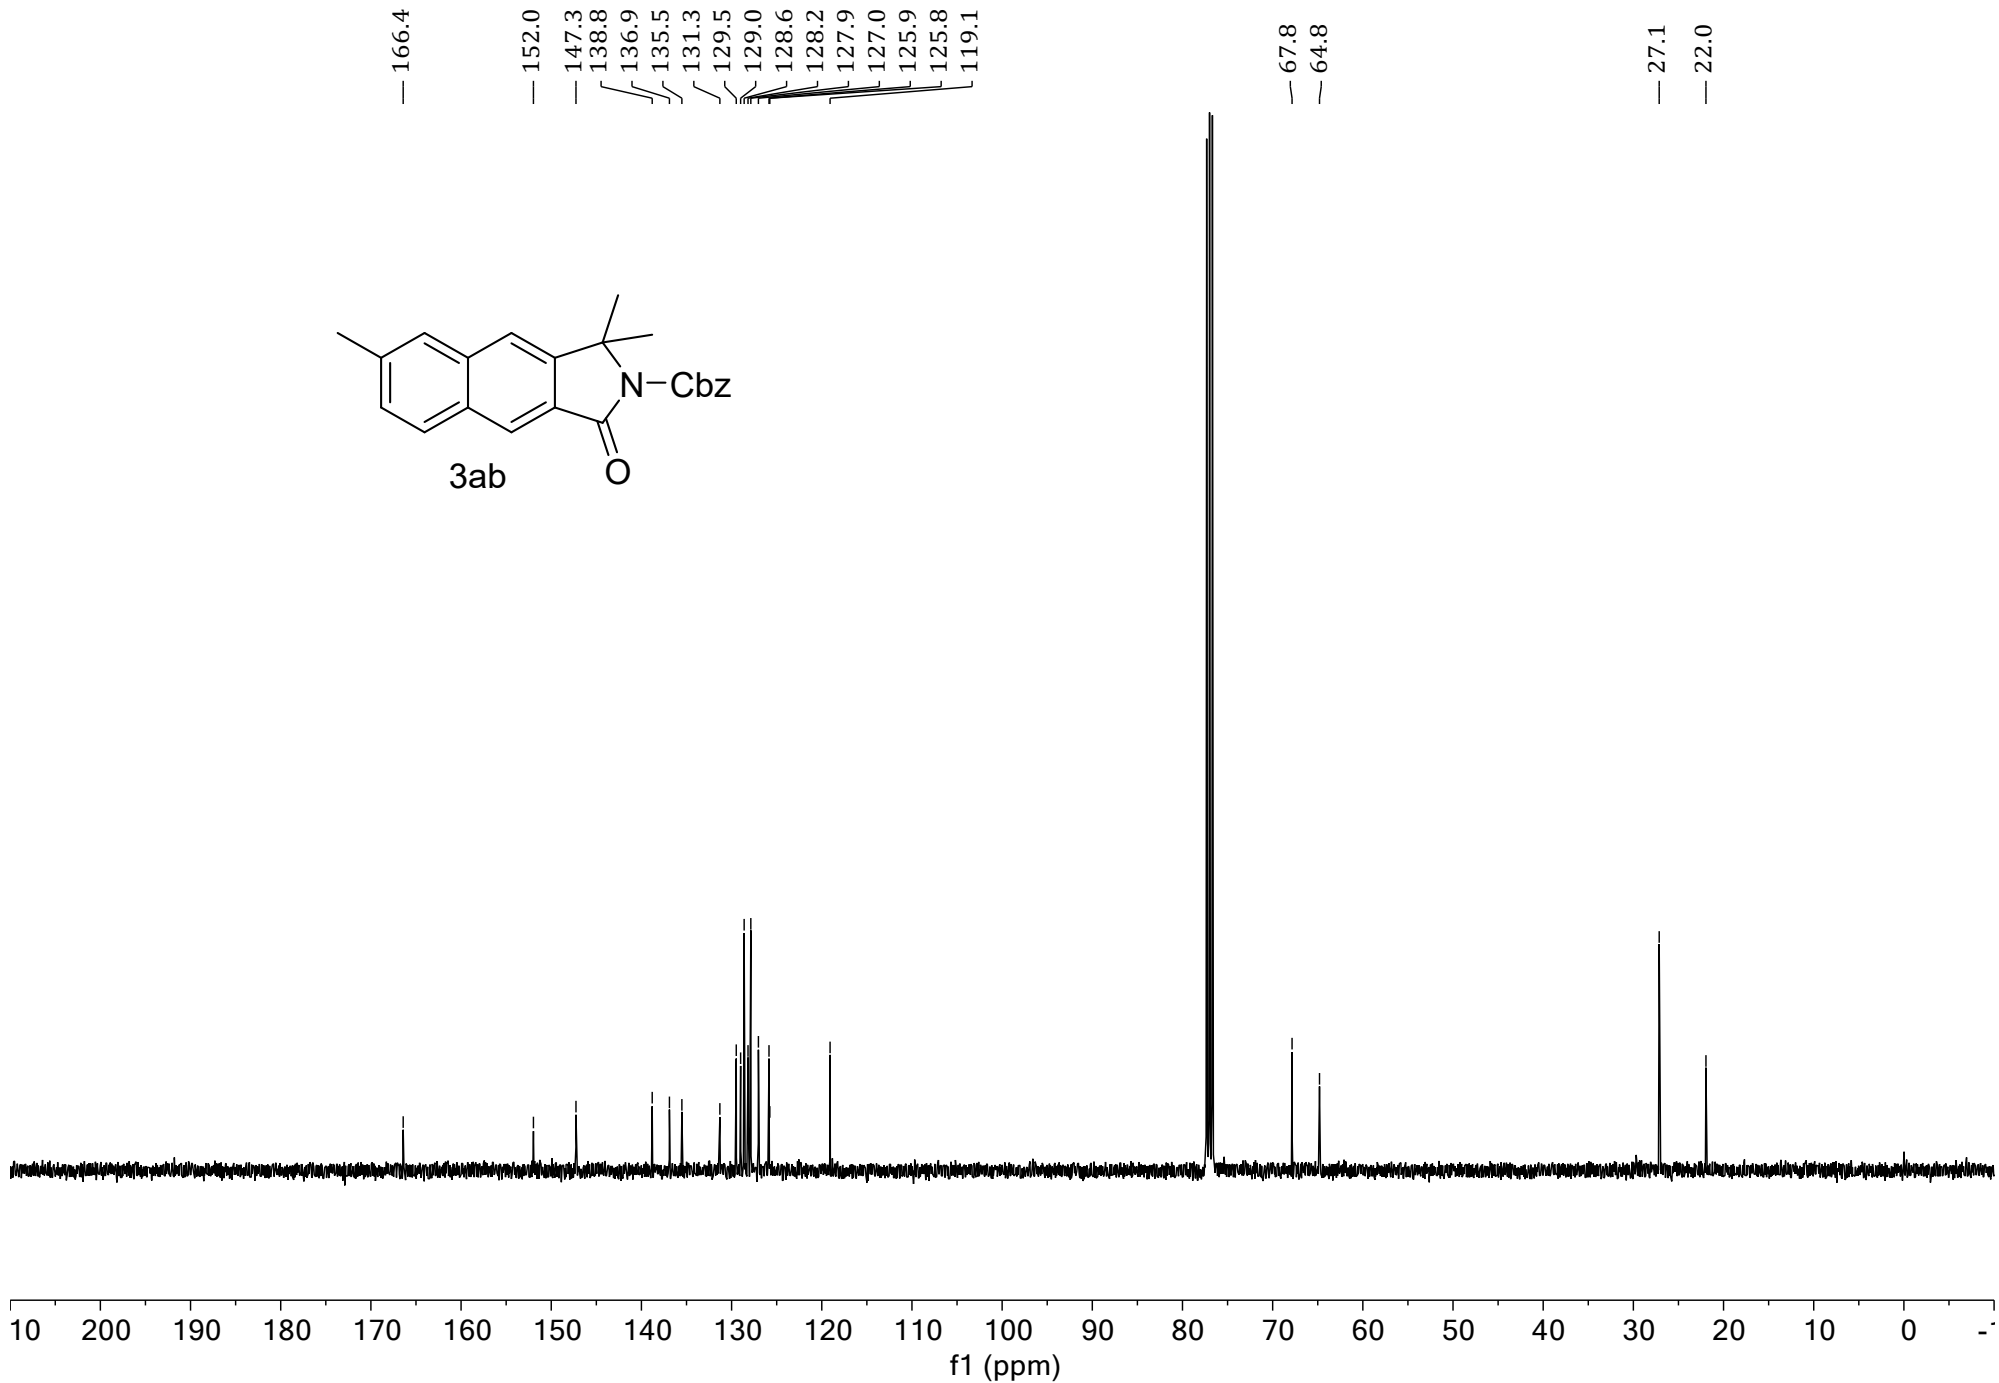

<sup>13</sup>C NMR (100 MHz, CDCl<sub>3</sub>) spectra of **3ab**.

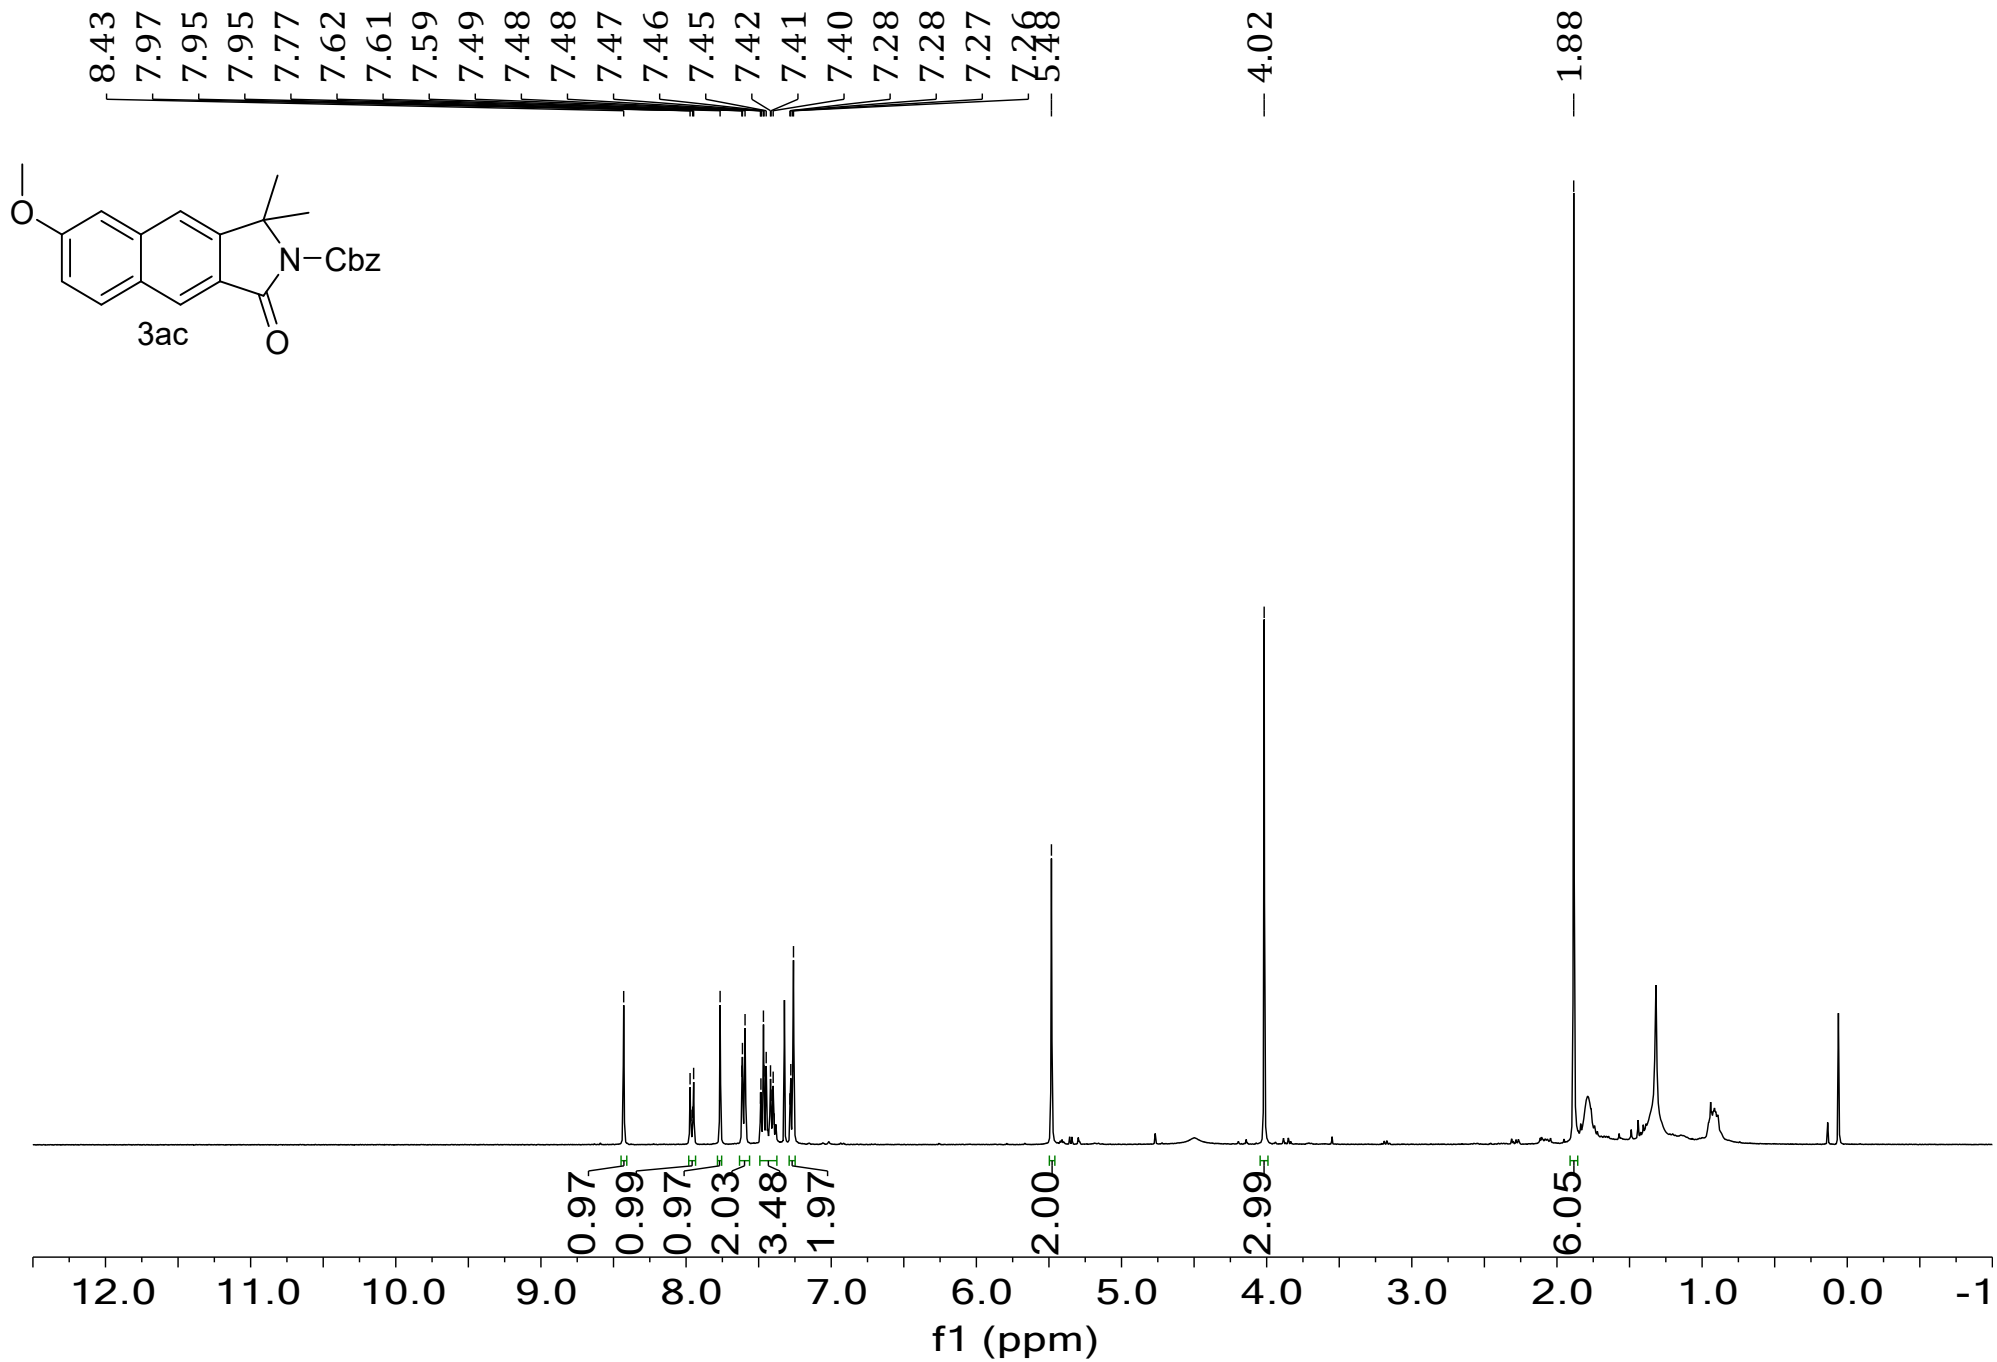

<sup>1</sup>H NMR (400 MHz, CDCl<sub>3</sub>) spectra of **3ac**

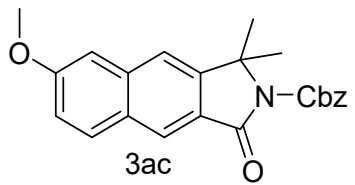

— 166.4  
— 159.7  
— 152.0  
— 148.0  
— 138.4  
— 135.5  
— 131.2  
— 128.6  
— 128.2  
— 127.9  
— 125.9  
— 124.4  
— 120.0  
— 118.4  
— 105.7

— 67.8  
— 64.7

— 55.4

— 27.1

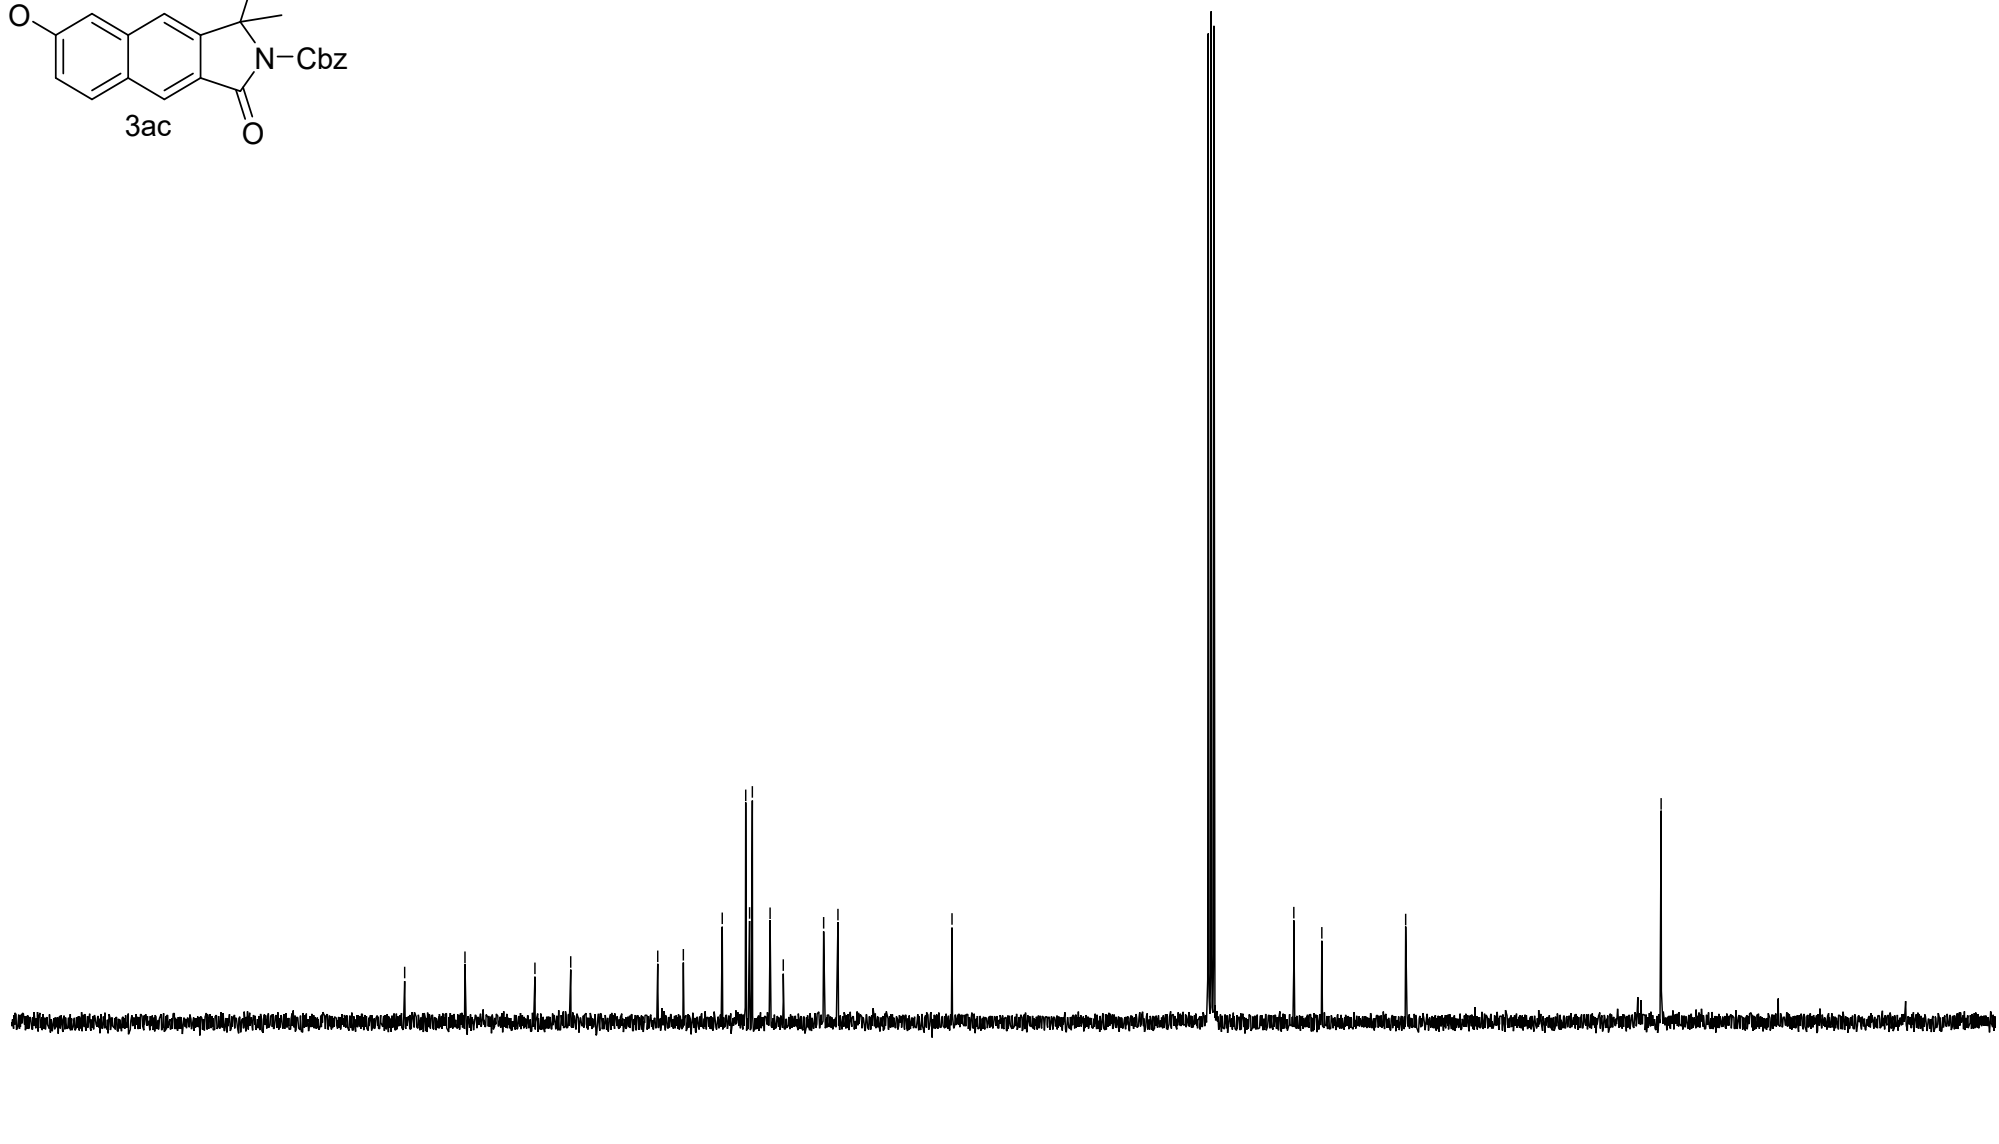

f1 (ppm)

<sup>13</sup>C NMR (100 MHz, CDCl<sub>3</sub>) spectra of **3ac**.

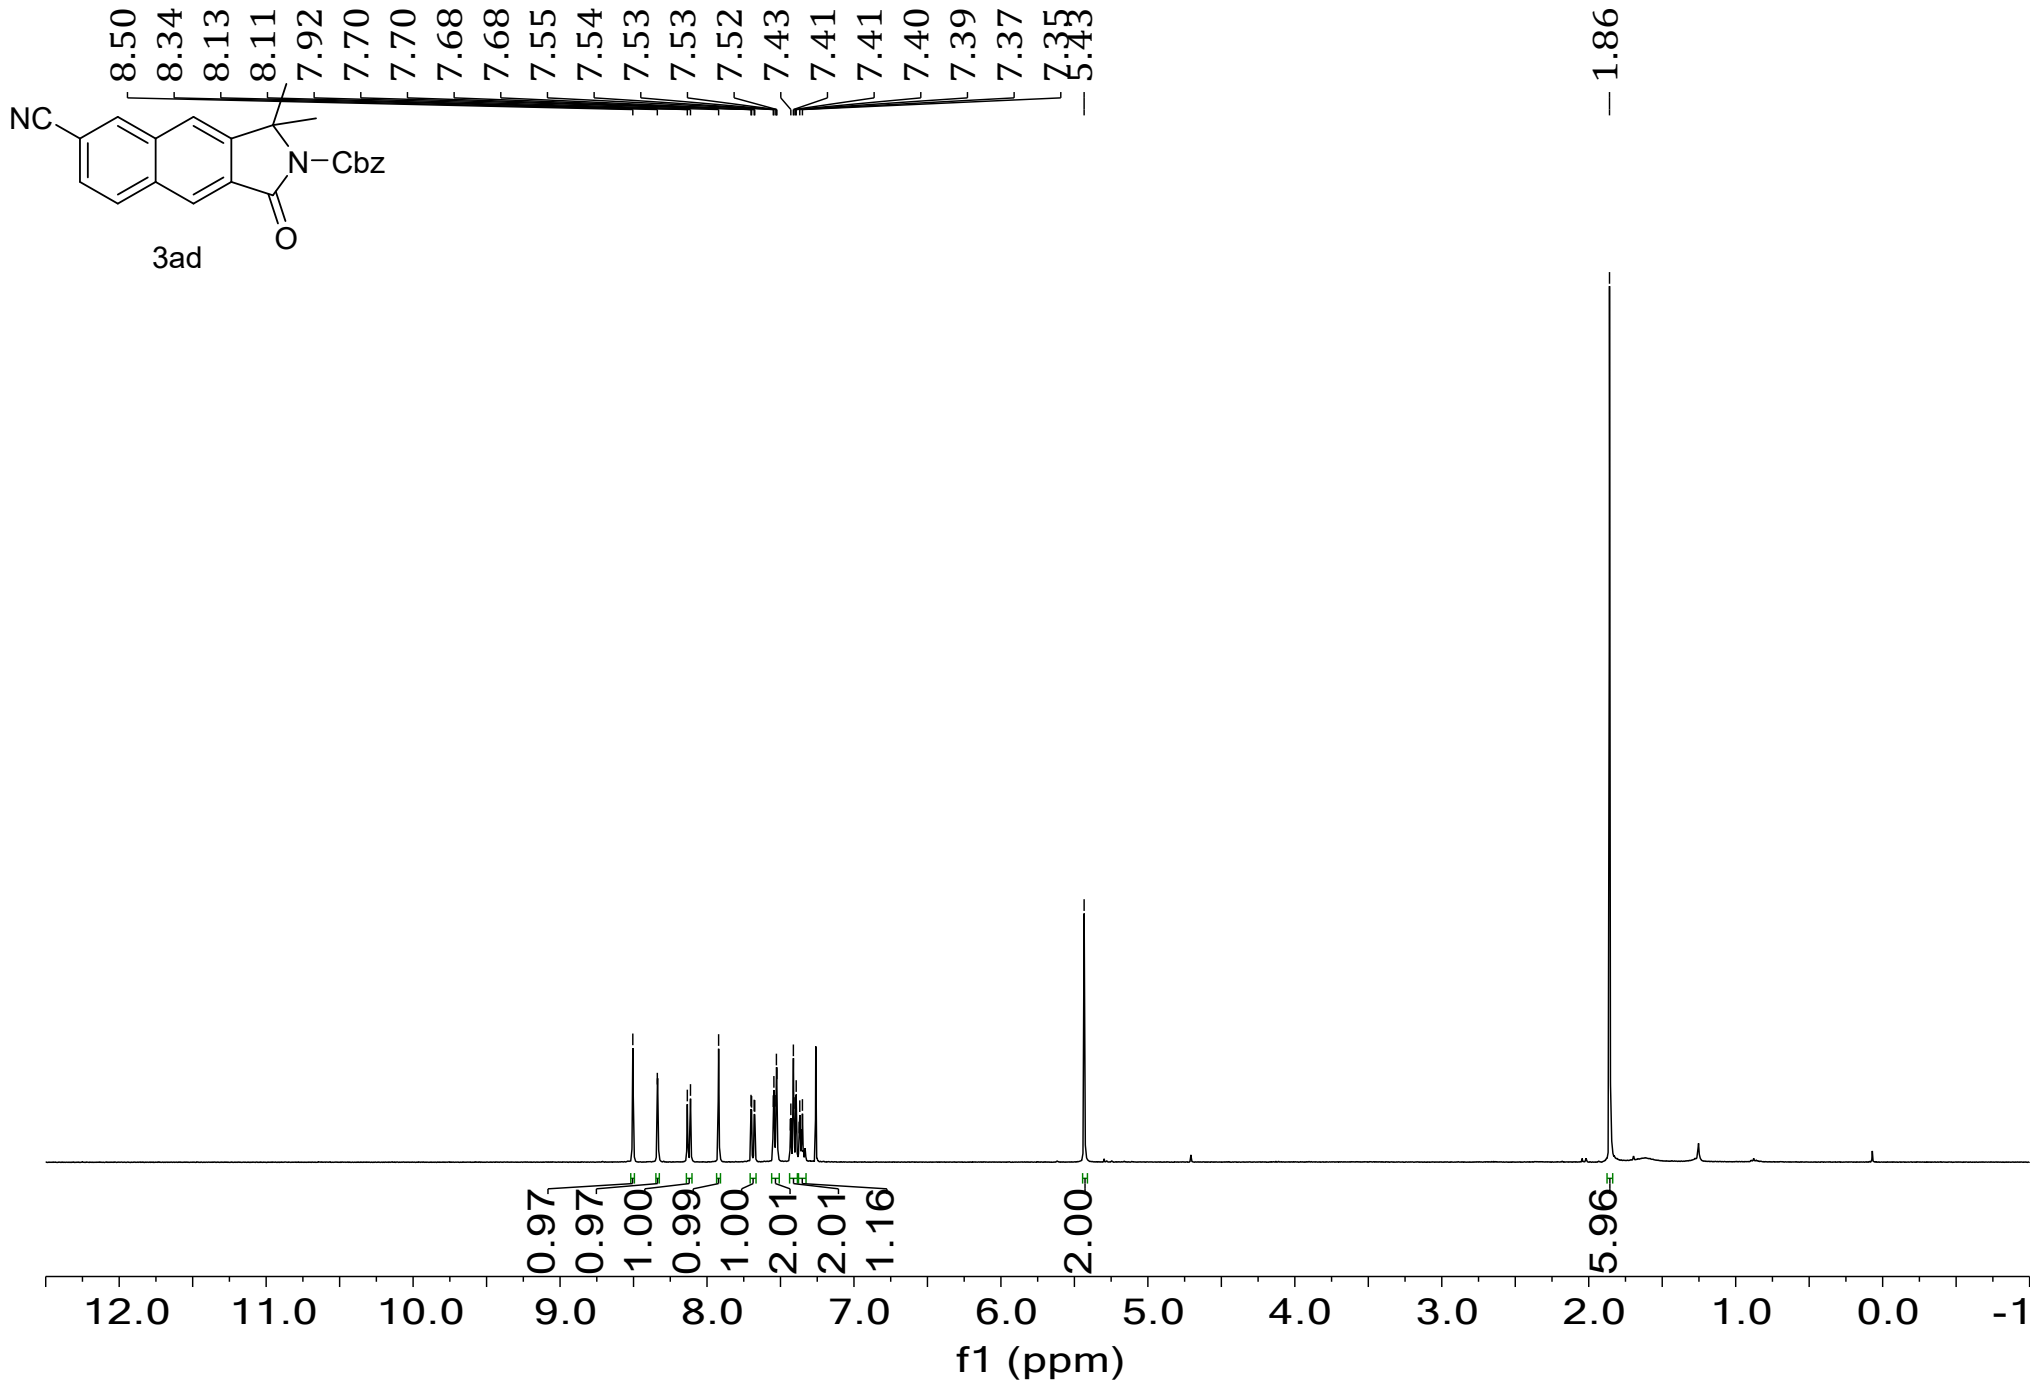

<sup>1</sup>H NMR (400 MHz, CDCl<sub>3</sub>) spectra of **3ad**

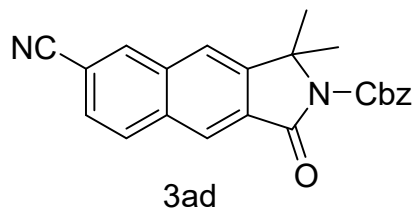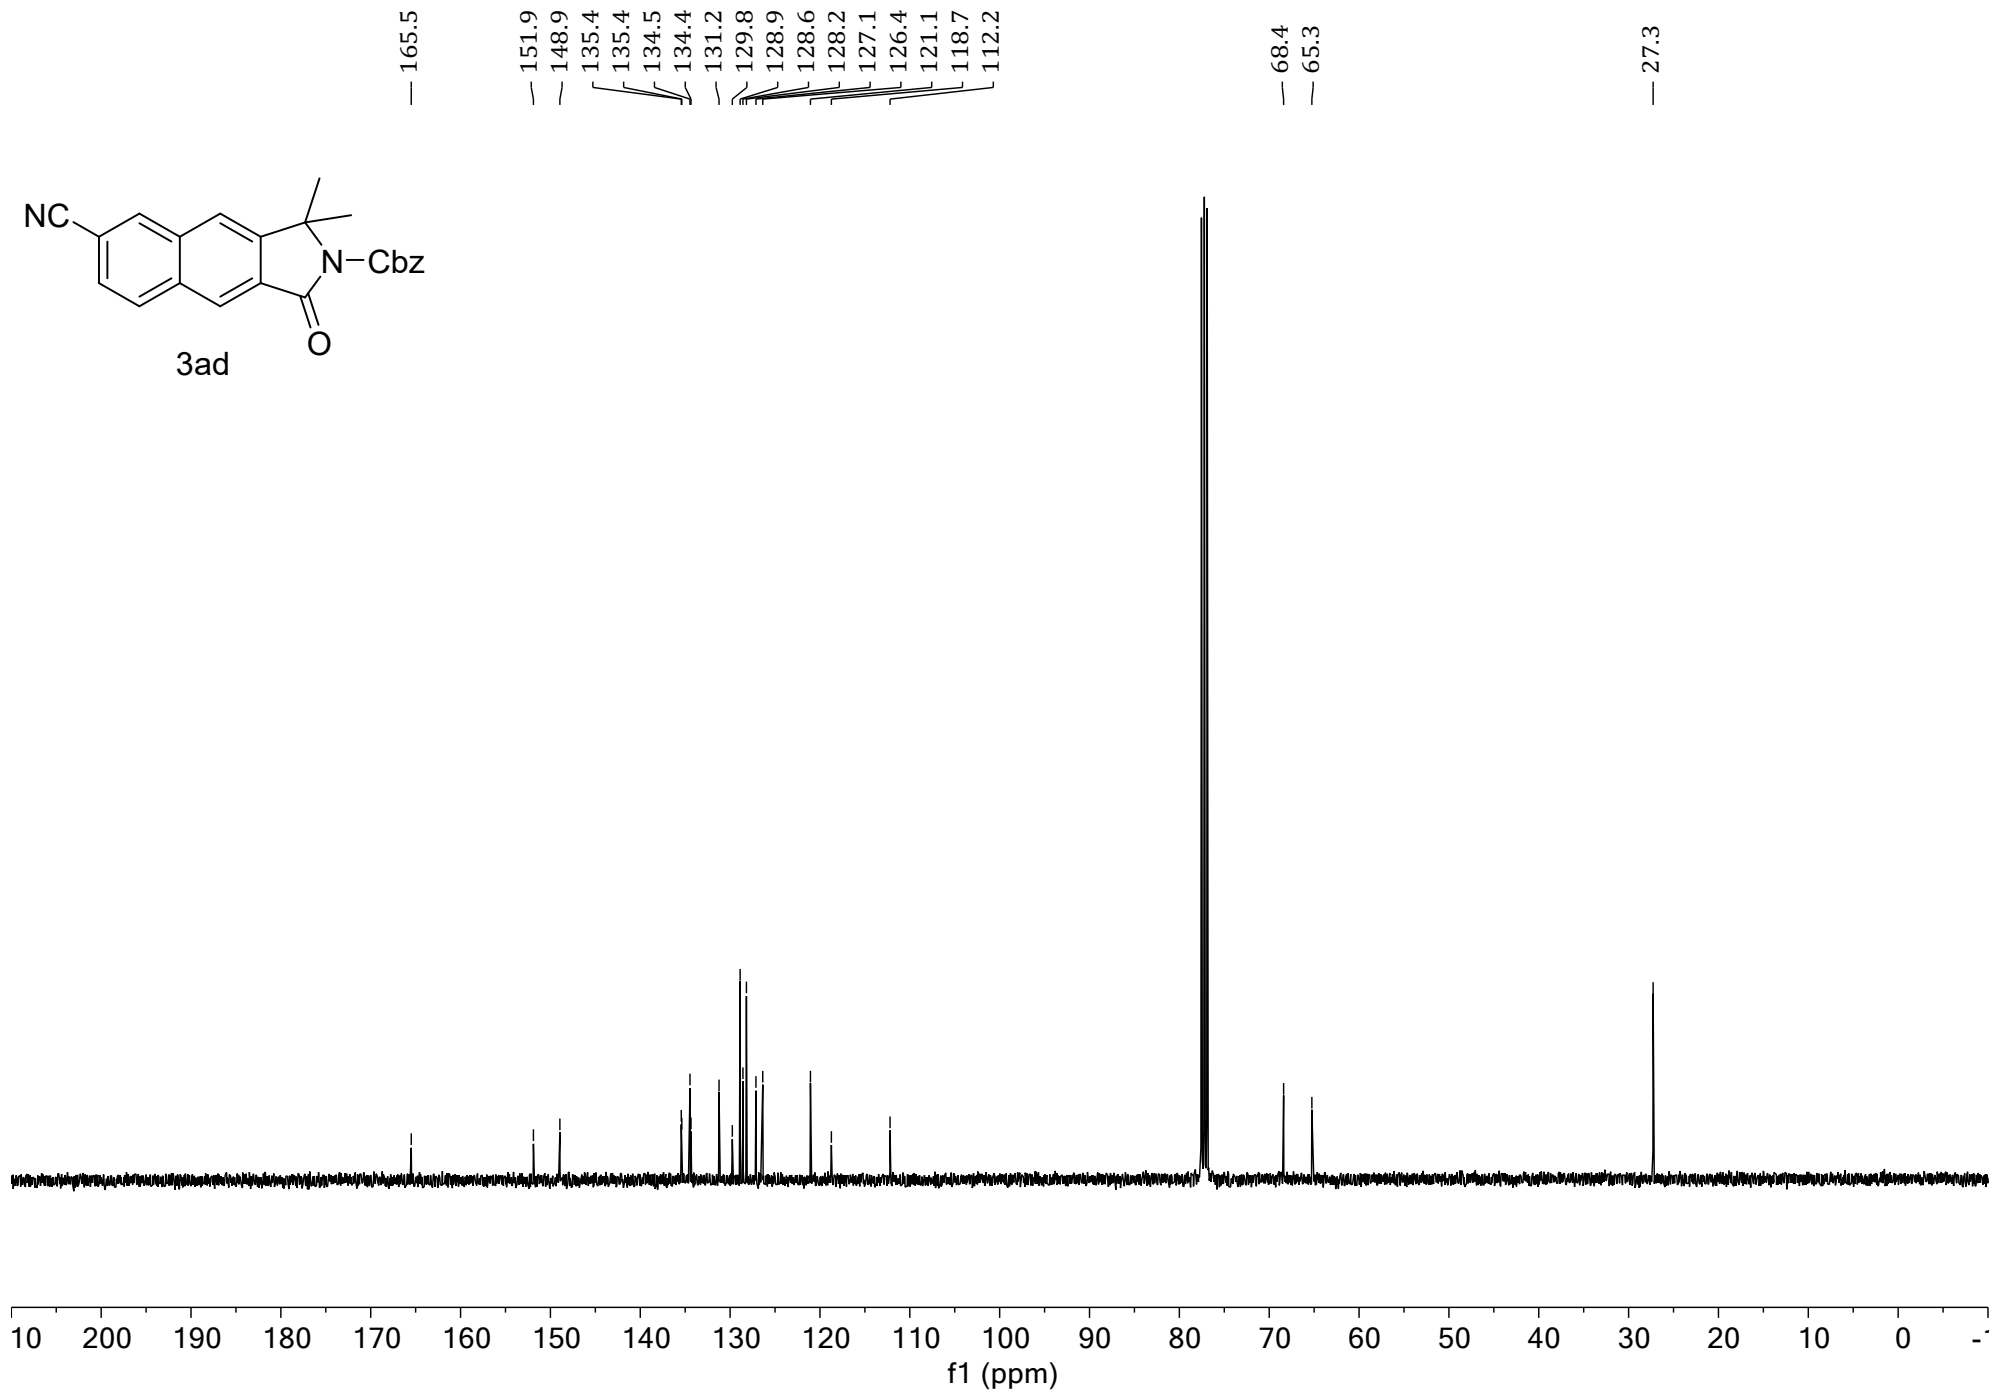

<sup>13</sup>C NMR (100 MHz, CDCl<sub>3</sub>) spectra of **3ad**.

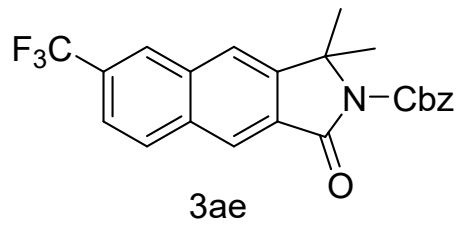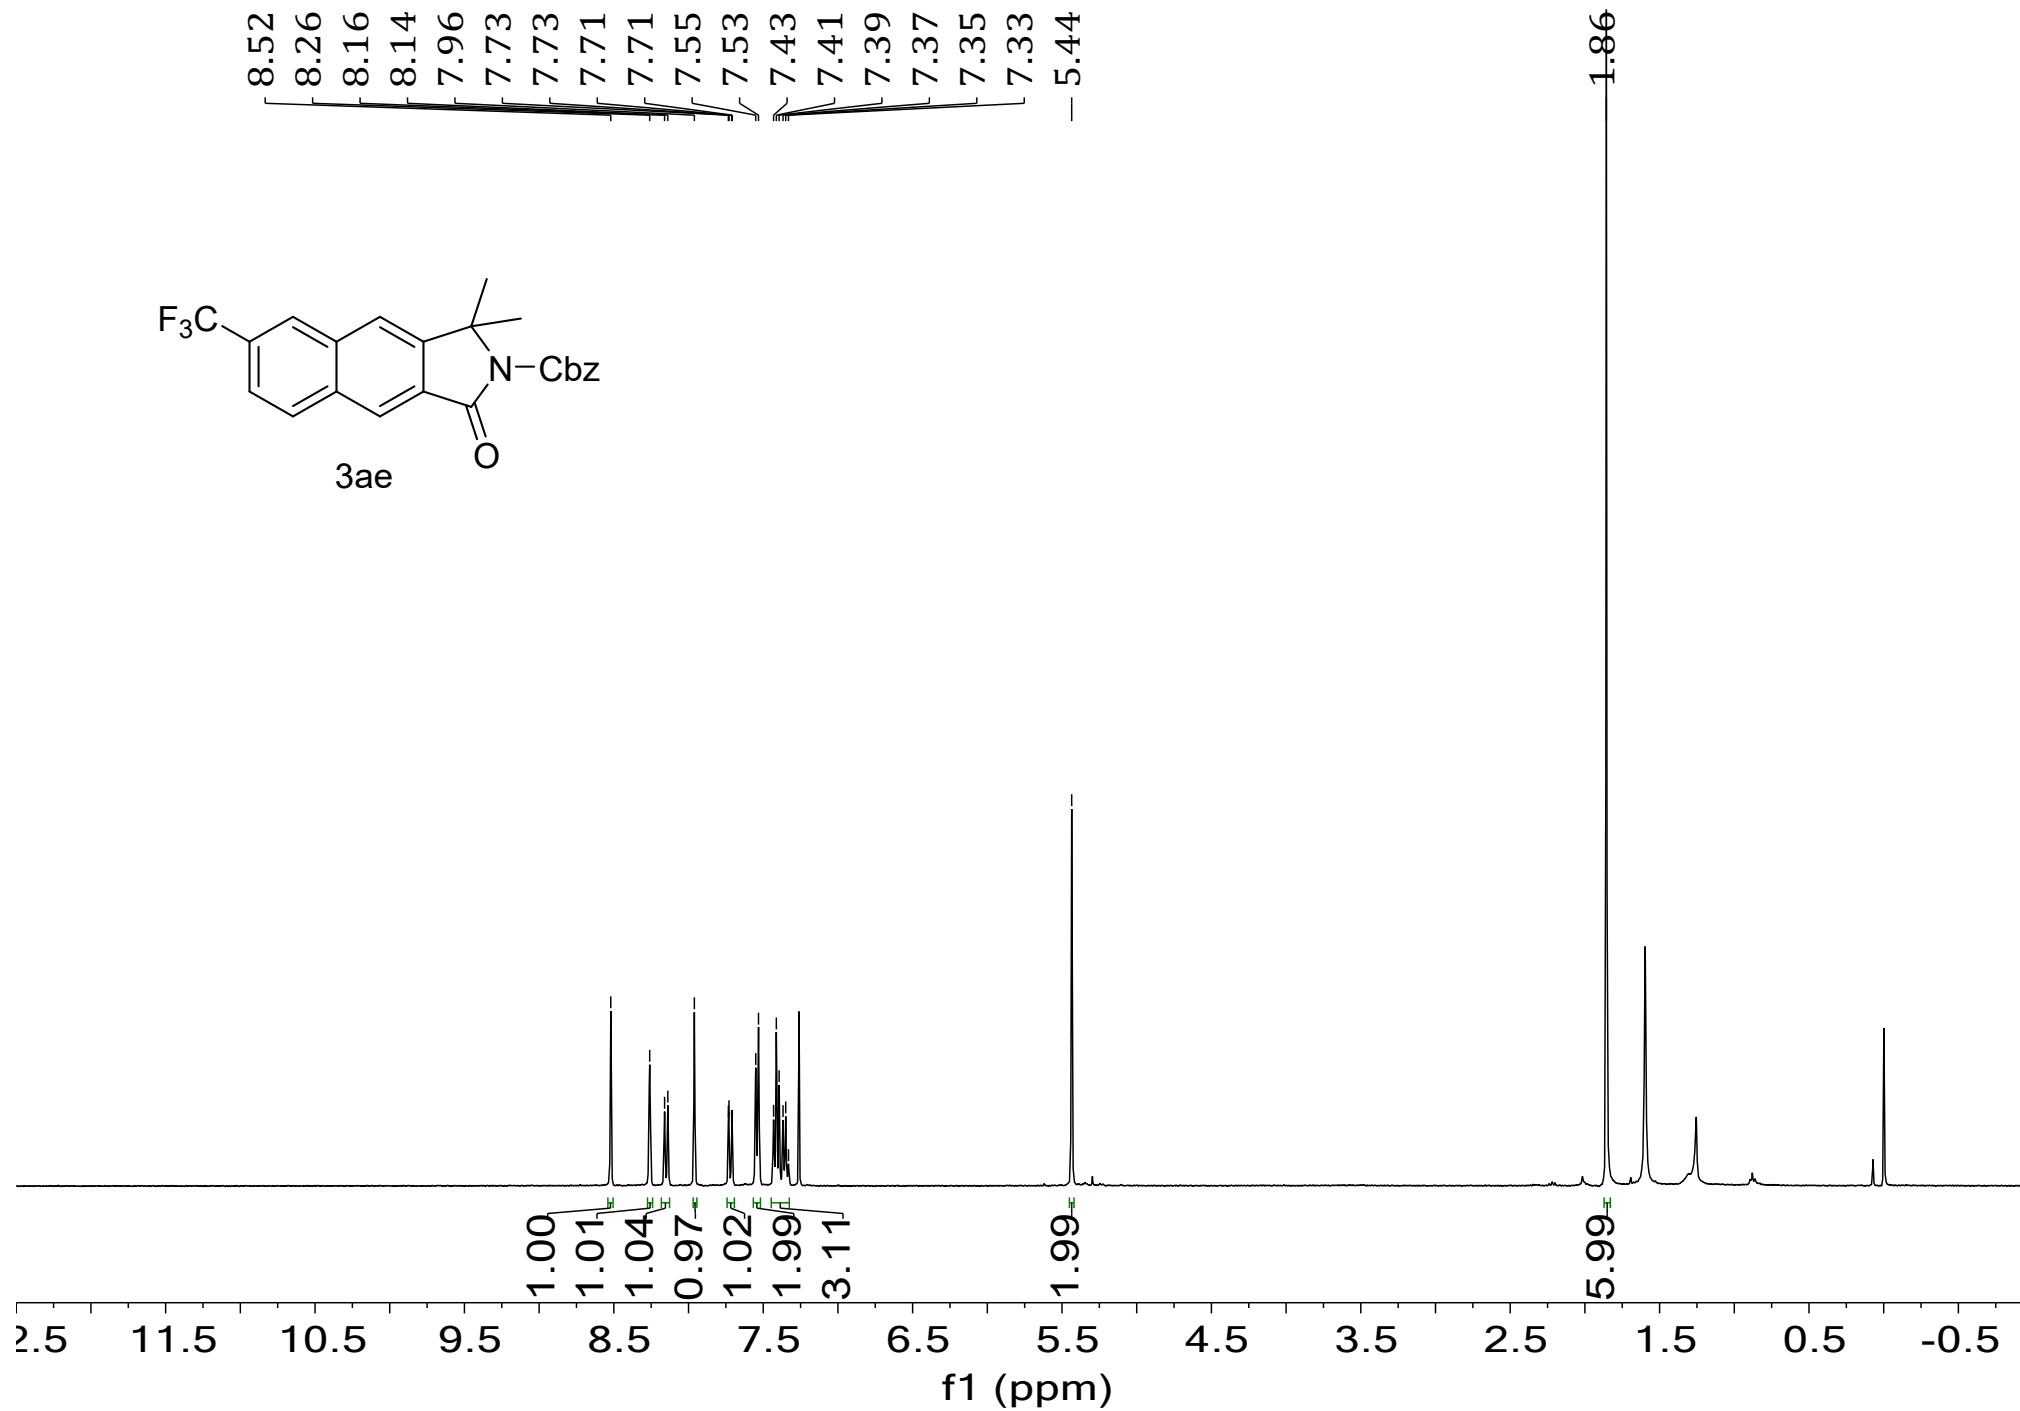

<sup>1</sup>H NMR (400 MHz, CDCl<sub>3</sub>) spectra of **3ae**.

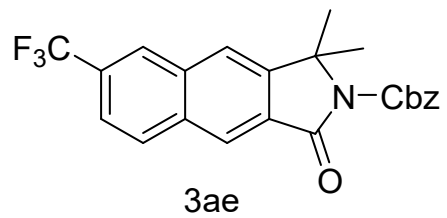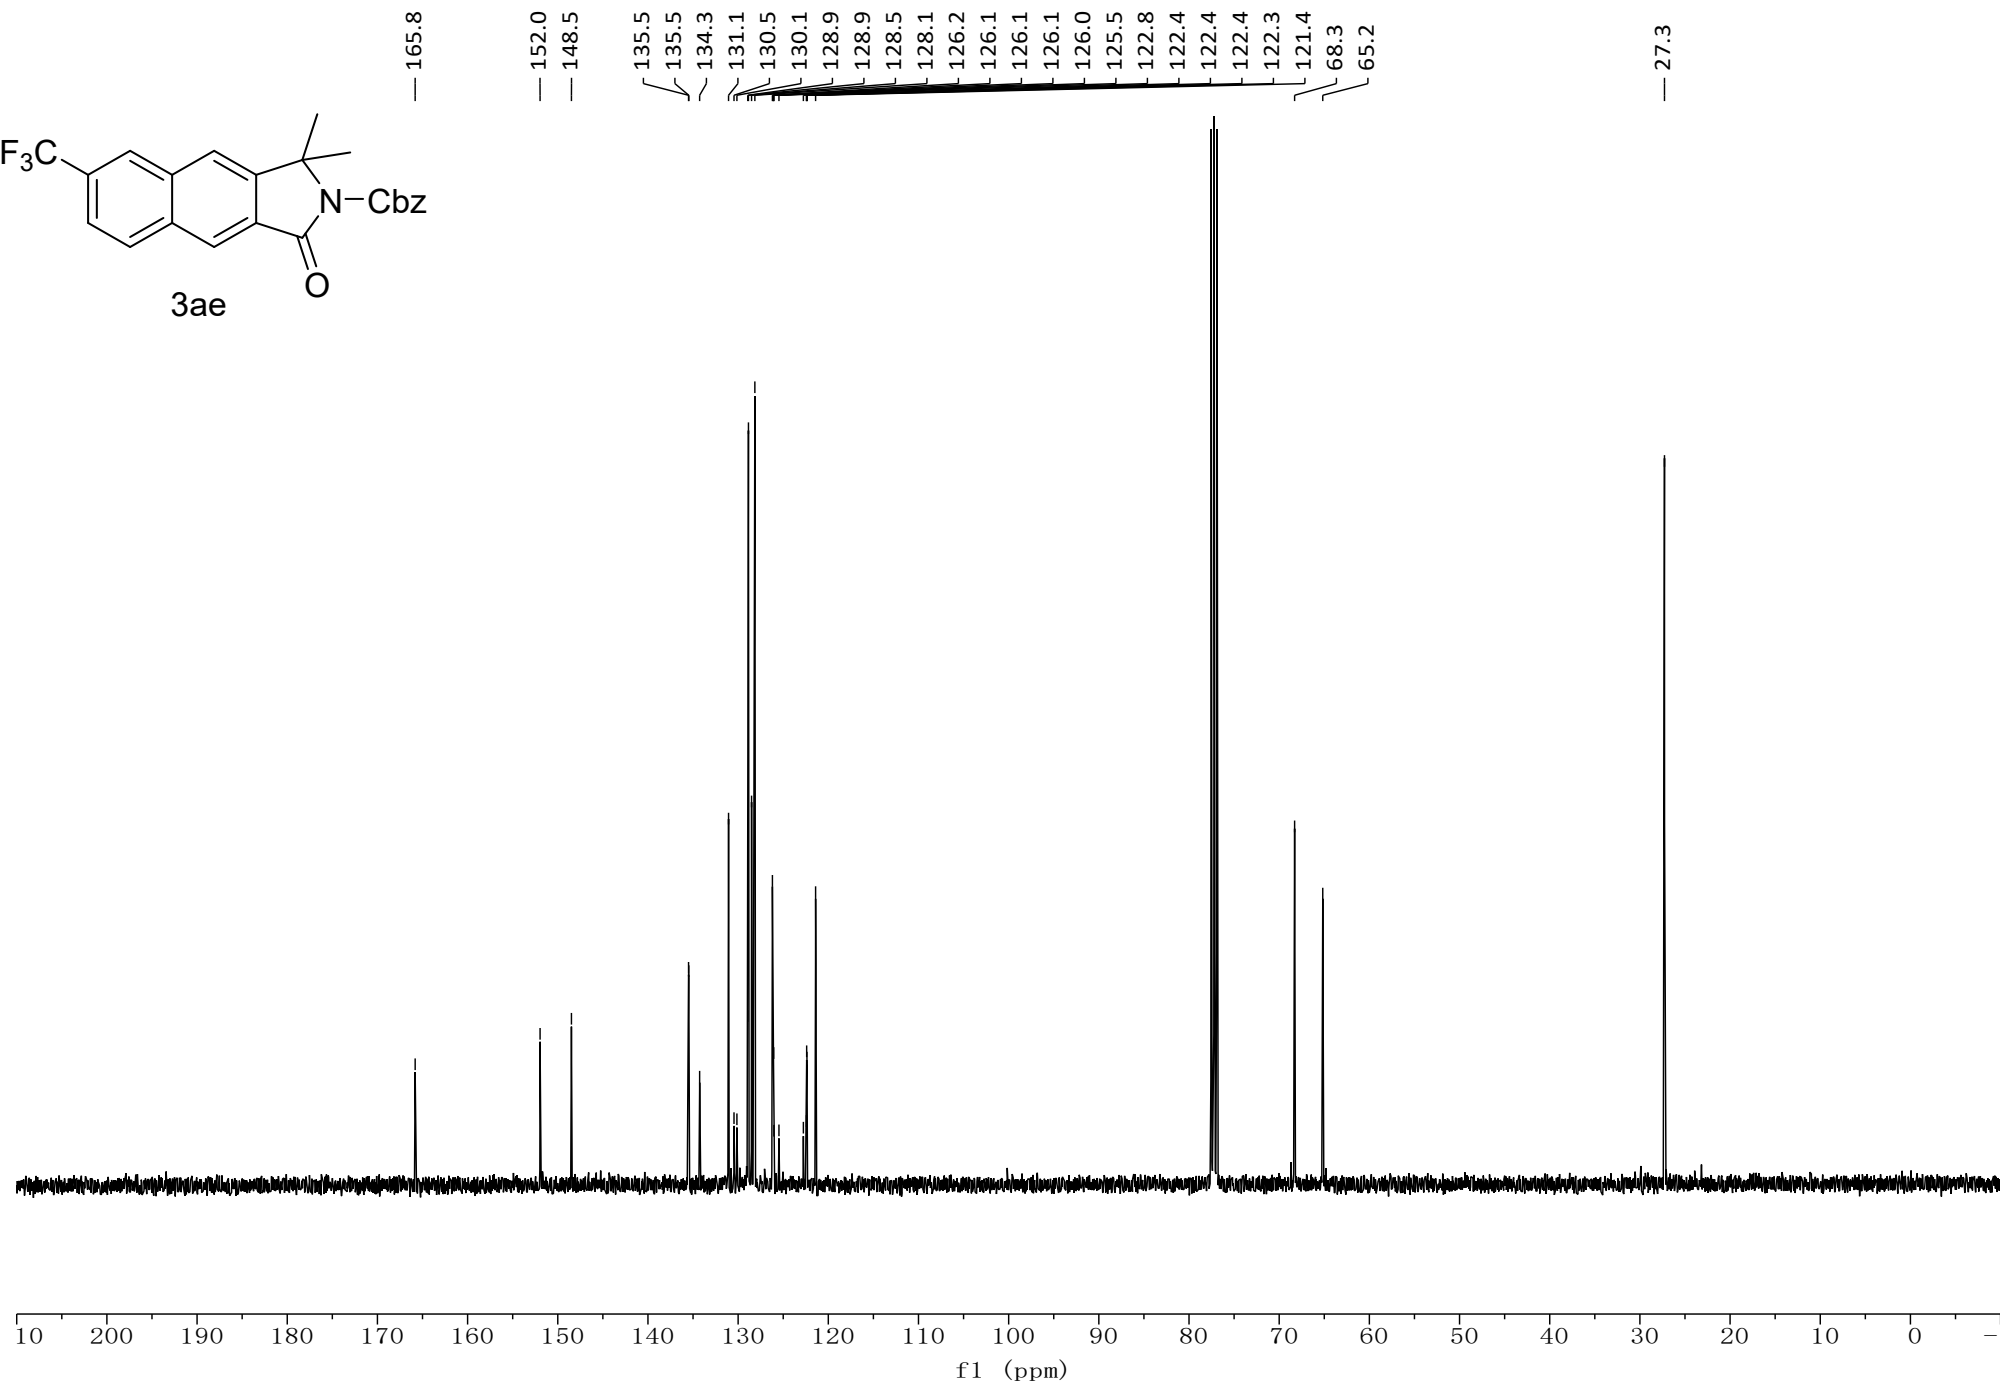

<sup>13</sup>C NMR (100 MHz, CDCl<sub>3</sub>) spectra of **3ae**.



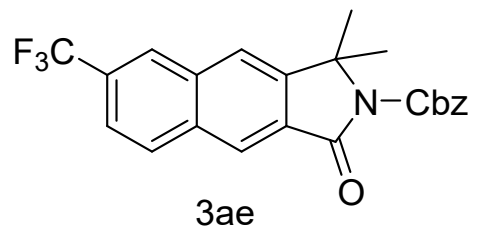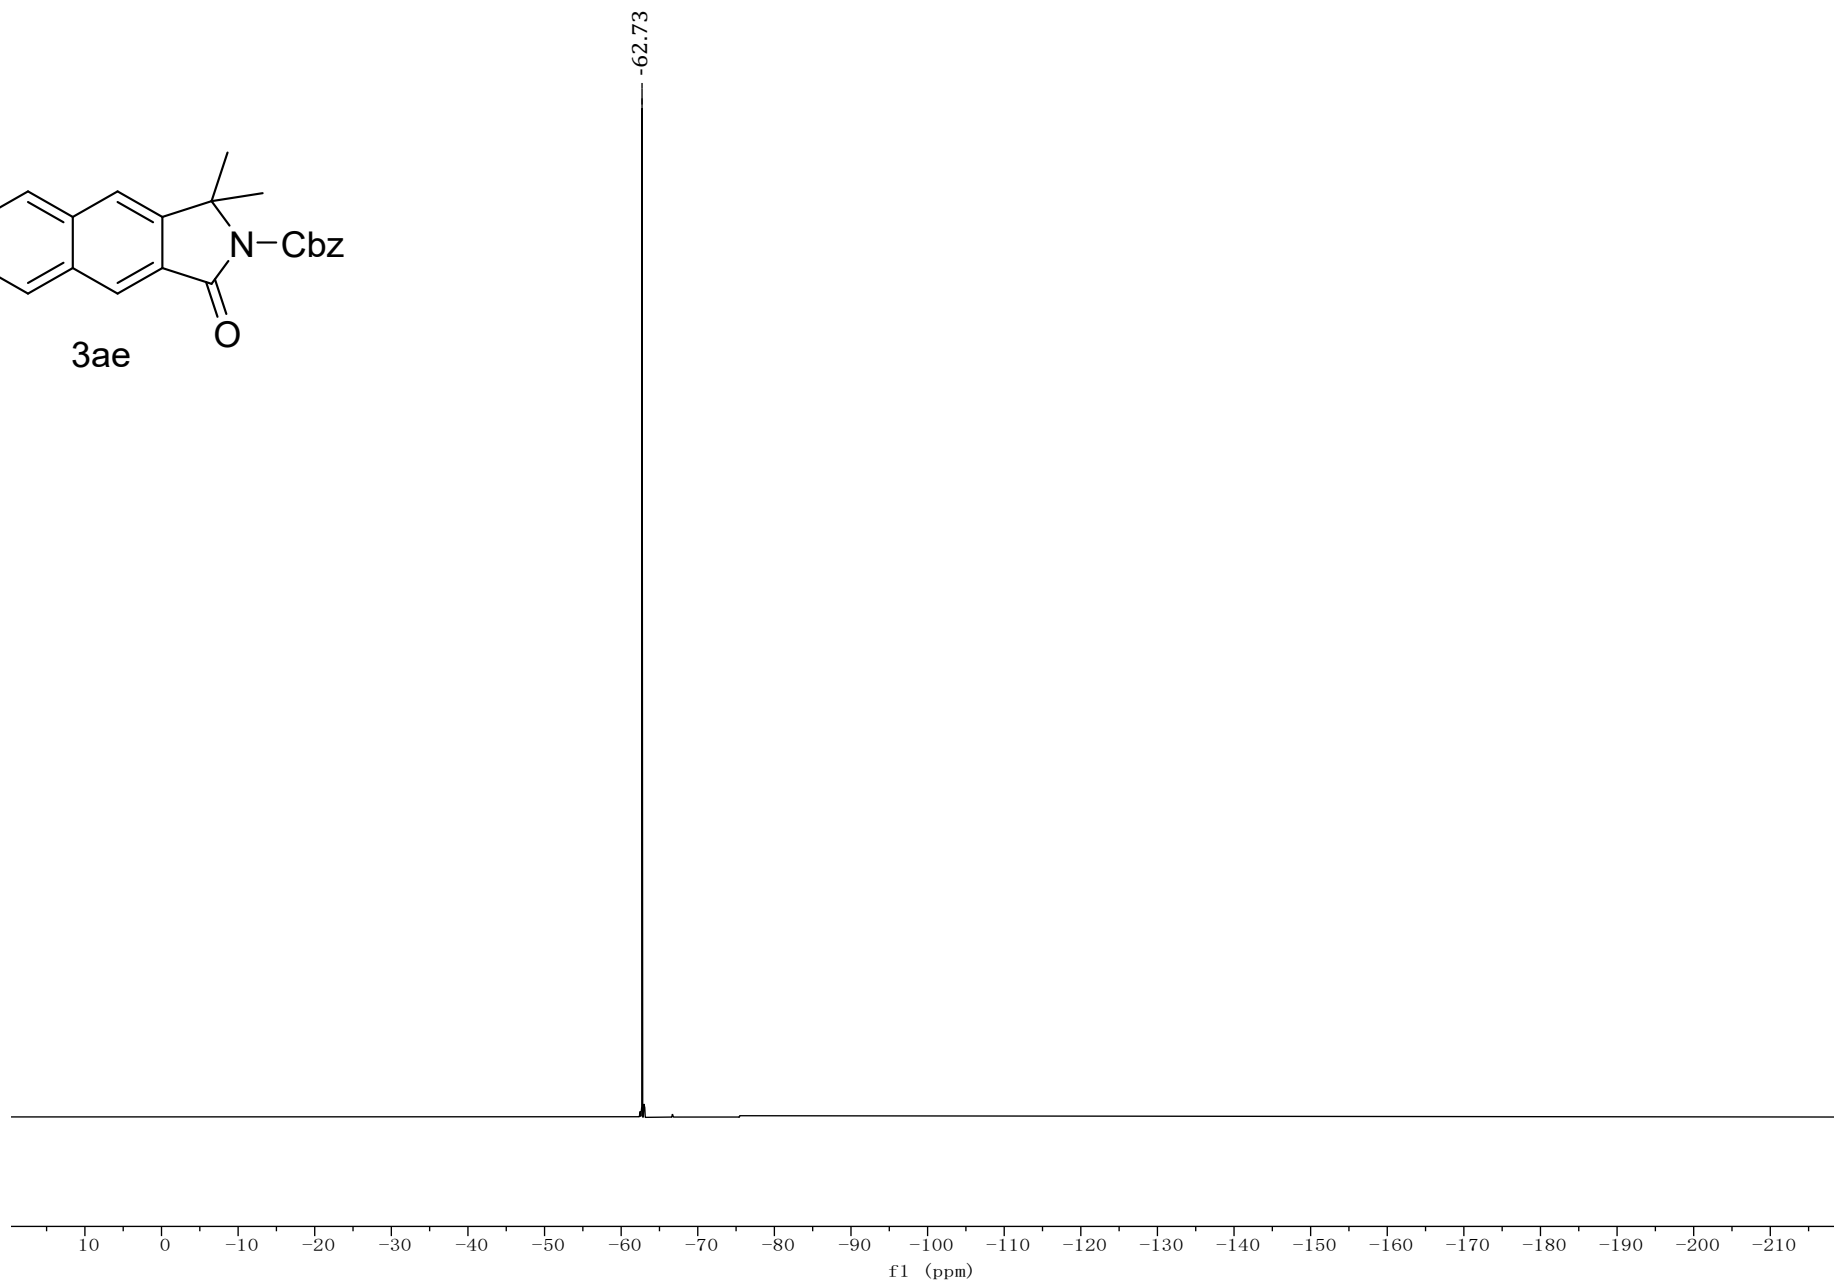

$^{19}\text{F}$  NMR (400 MHz,  $\text{CDCl}_3$ ) spectra of **3ae**.

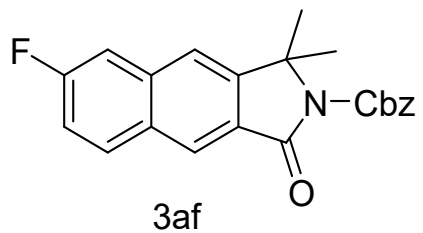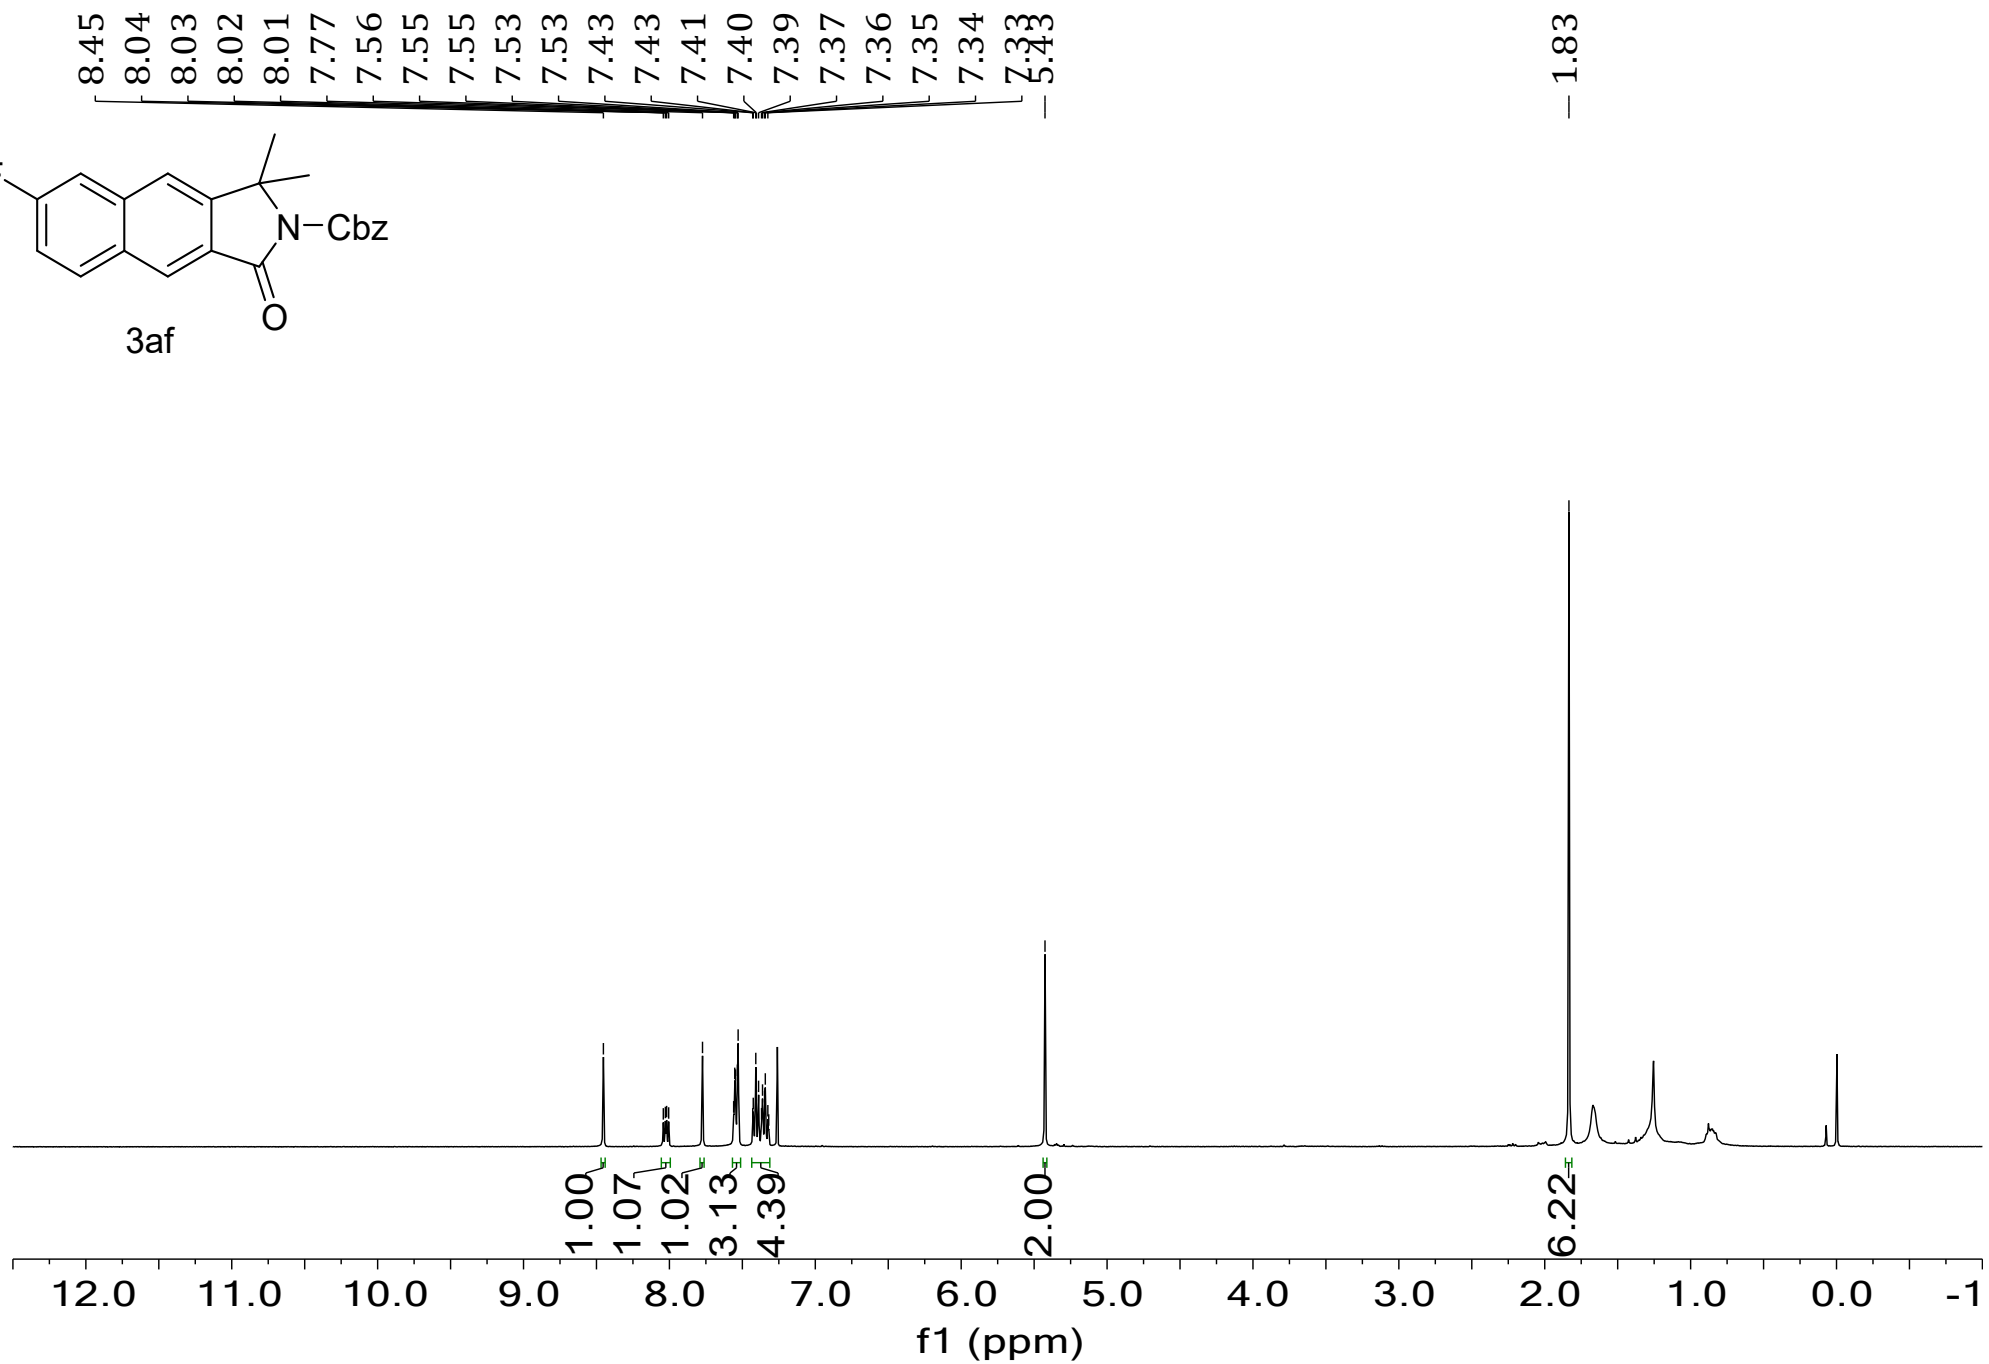

$^1\text{H}$  NMR (400 MHz,  $\text{CDCl}_3$ ) spectra of **3af**.

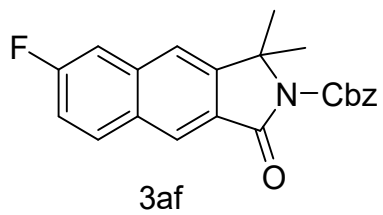

166.0  
163.4  
160.9  
151.9  
148.2  
137.7  
137.6  
135.4  
132.4  
132.3  
130.1  
128.6  
128.2  
127.9  
126.2  
119.3  
119.3  
117.6  
117.3  
111.4  
111.2

68.0  
64.8

27.1

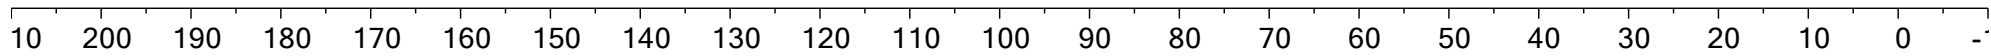

f1 (ppm)

<sup>13</sup>C NMR (100 MHz, CDCl<sub>3</sub>) spectra of 3af.

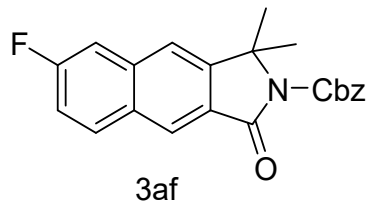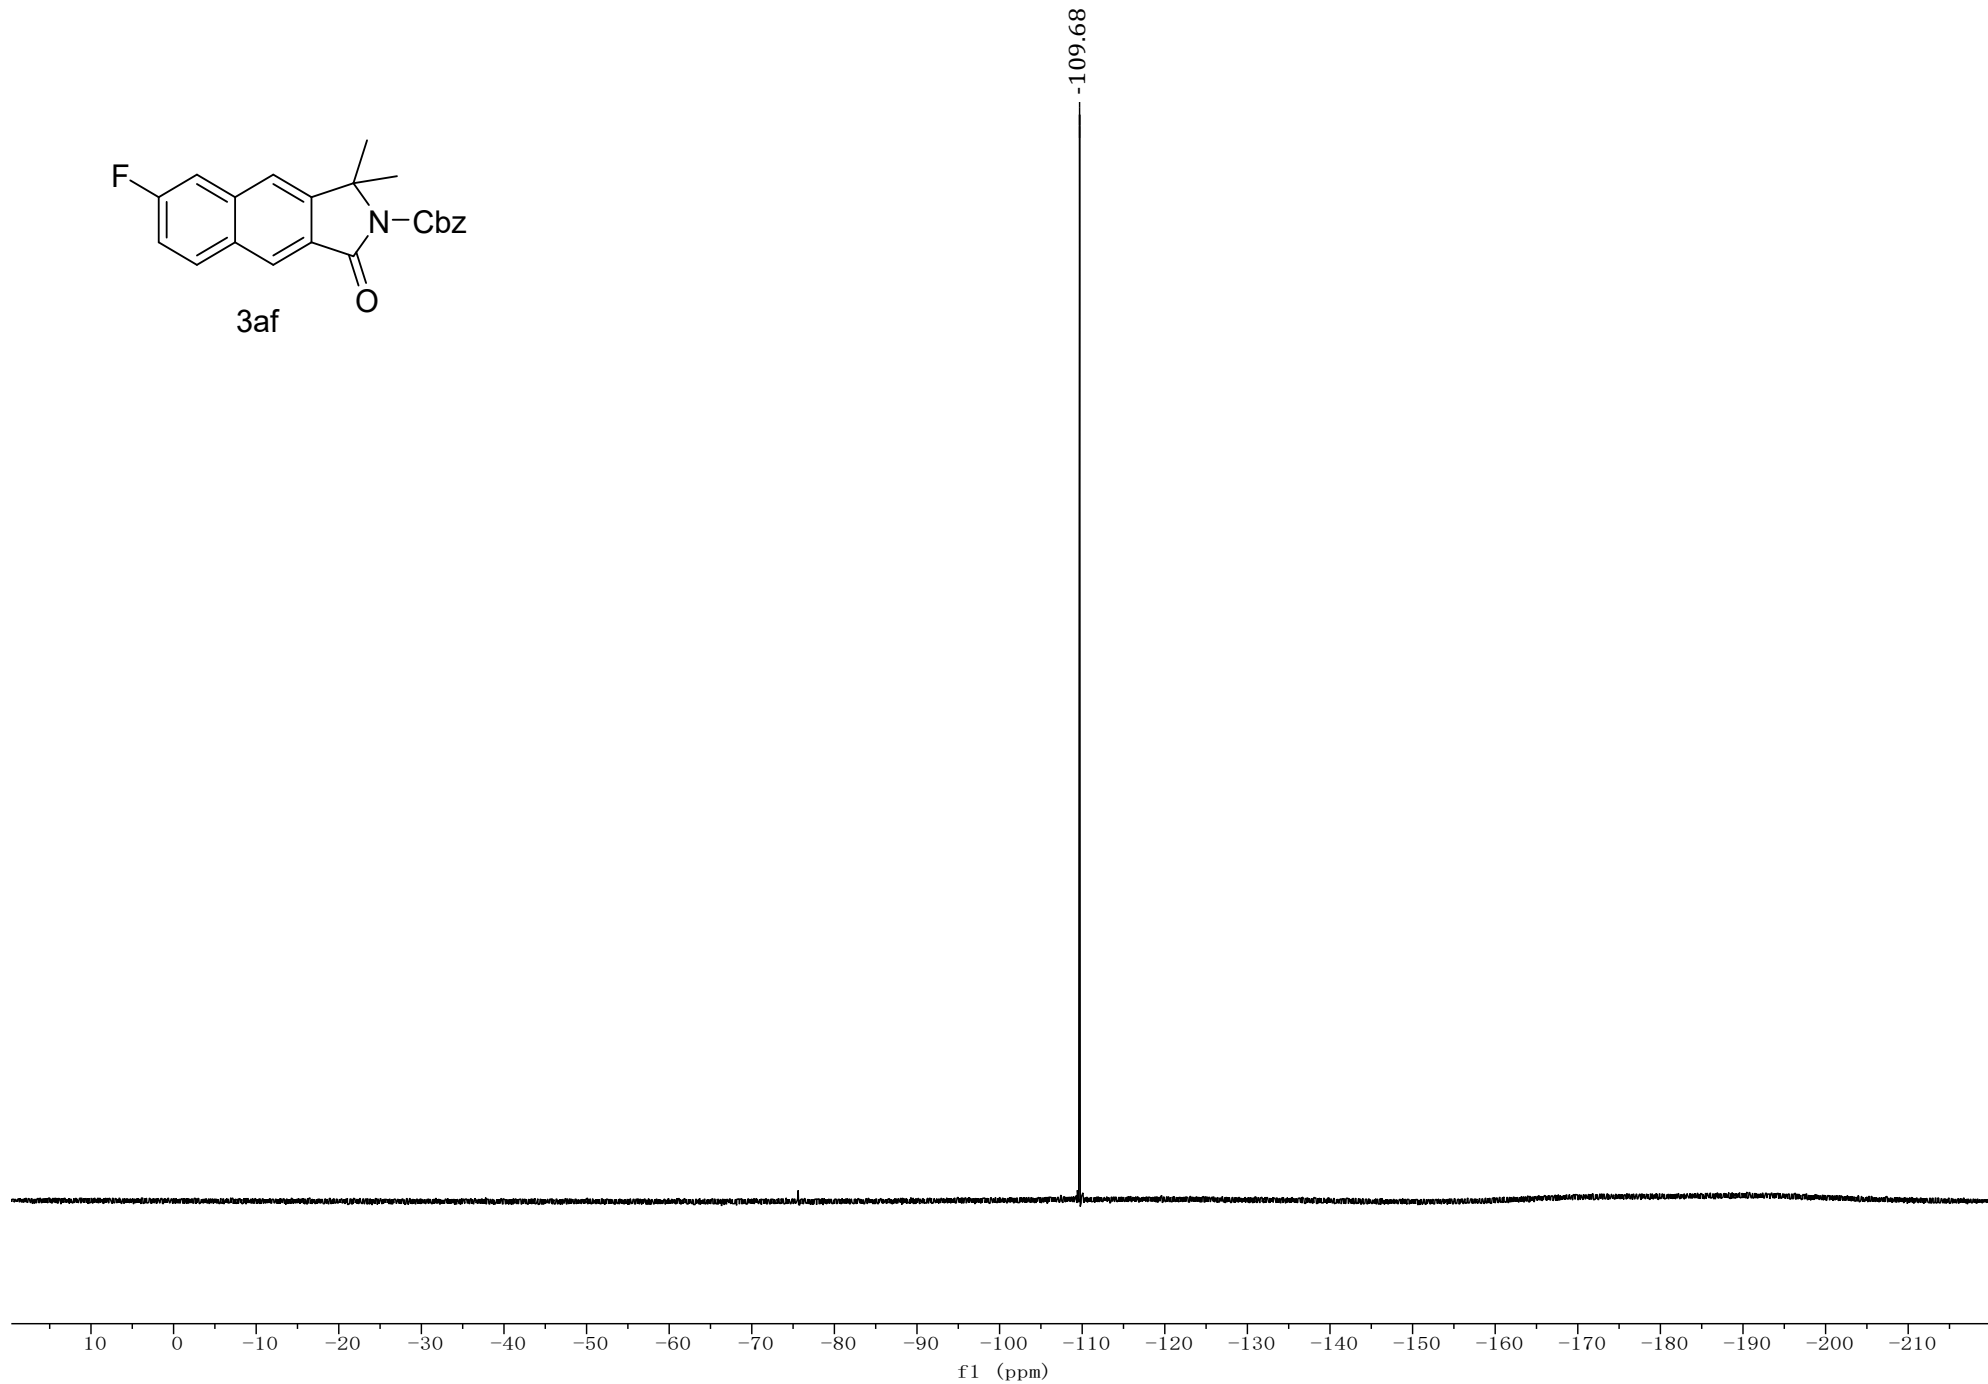

$^{19}\text{F}$  NMR (400 MHz,  $\text{CDCl}_3$ ) spectra of **3af**.

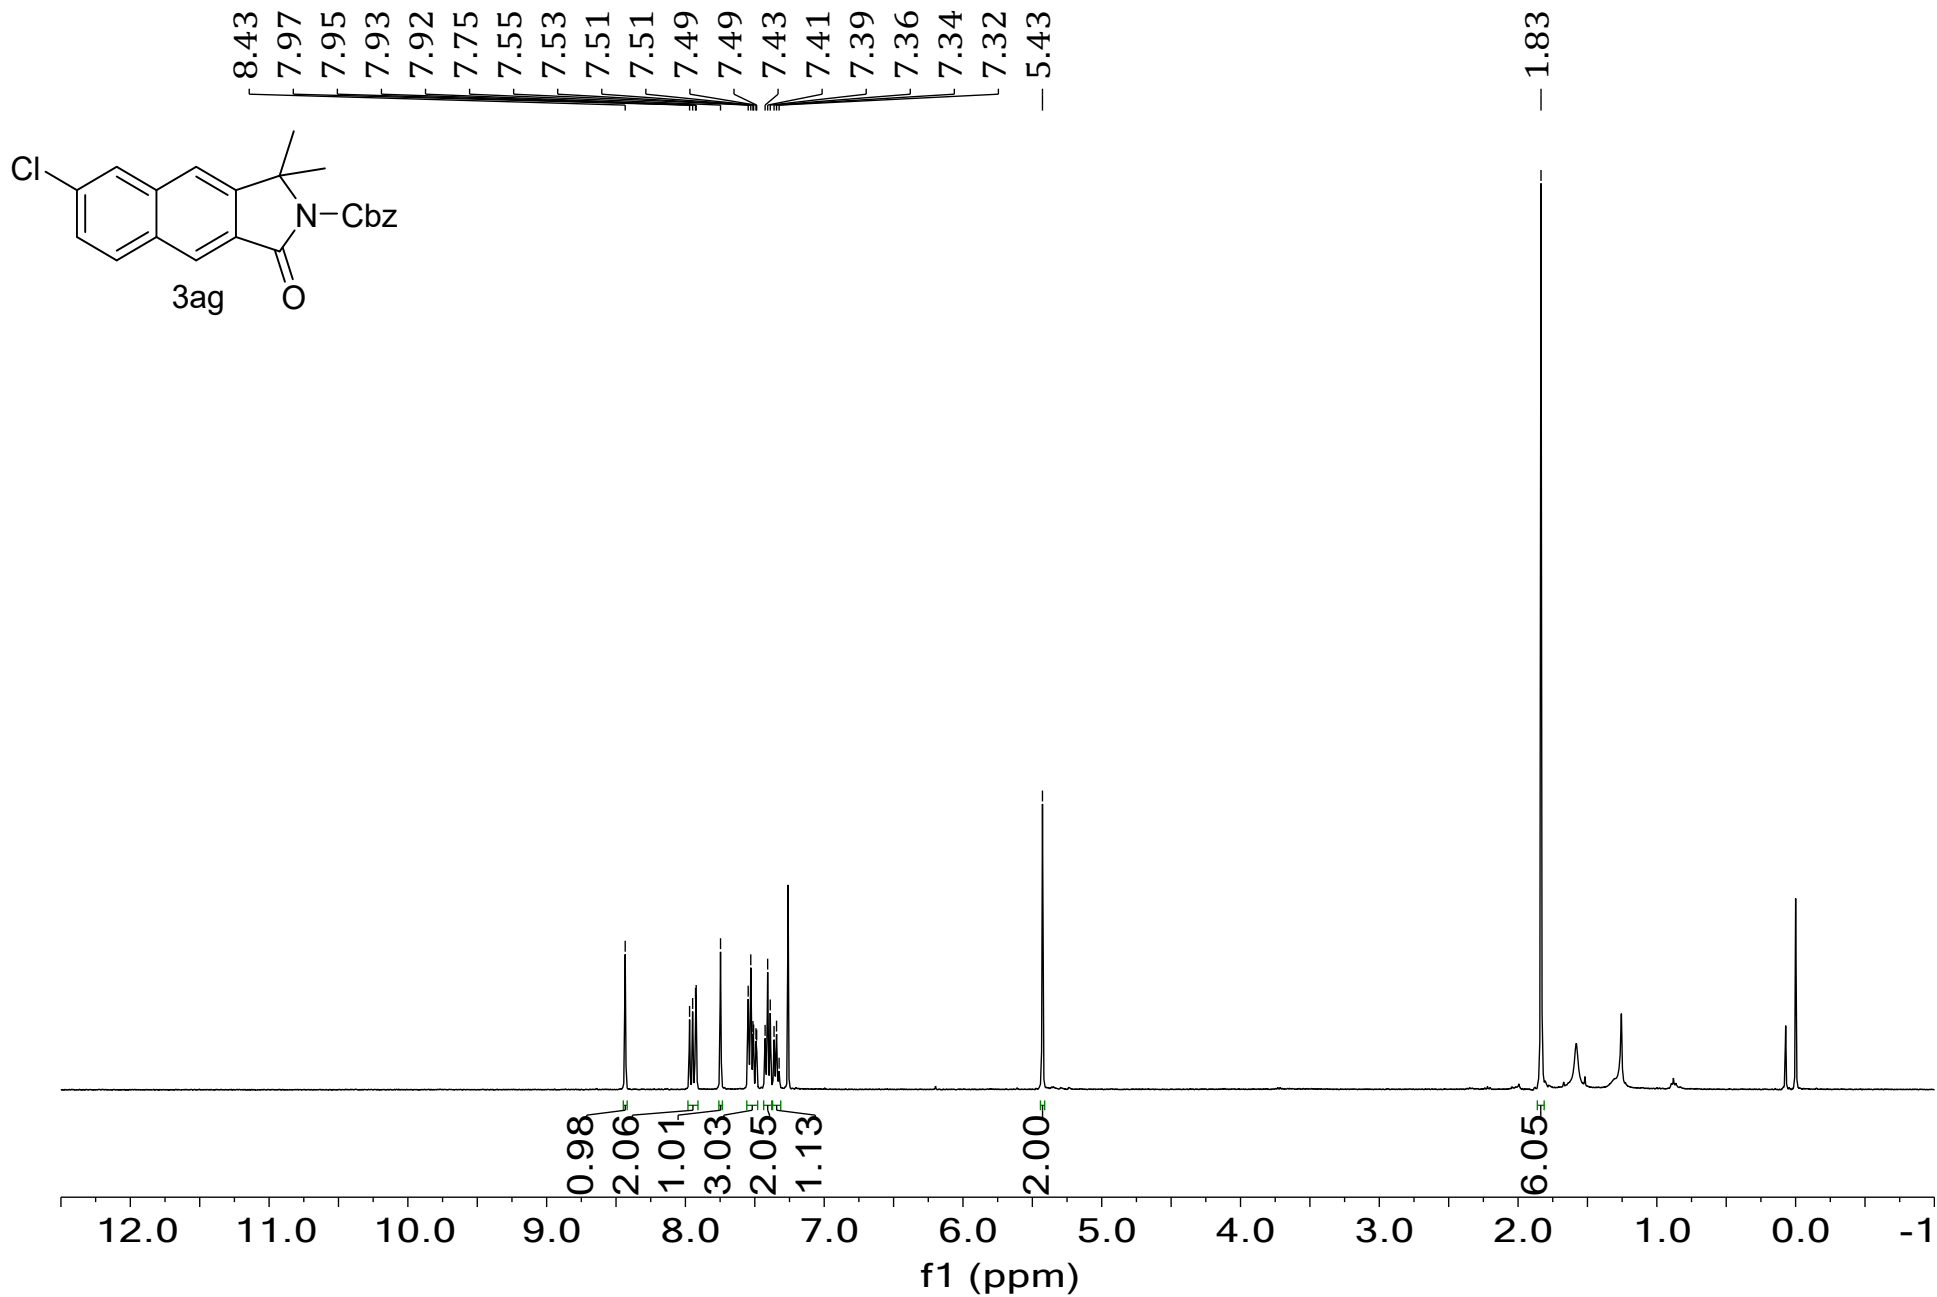

<sup>1</sup>H NMR (400 MHz, CDCl<sub>3</sub>) spectra of **3ag**.

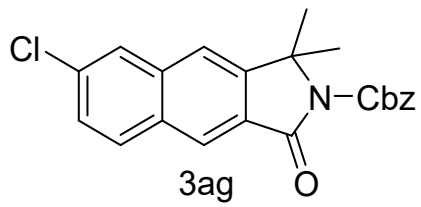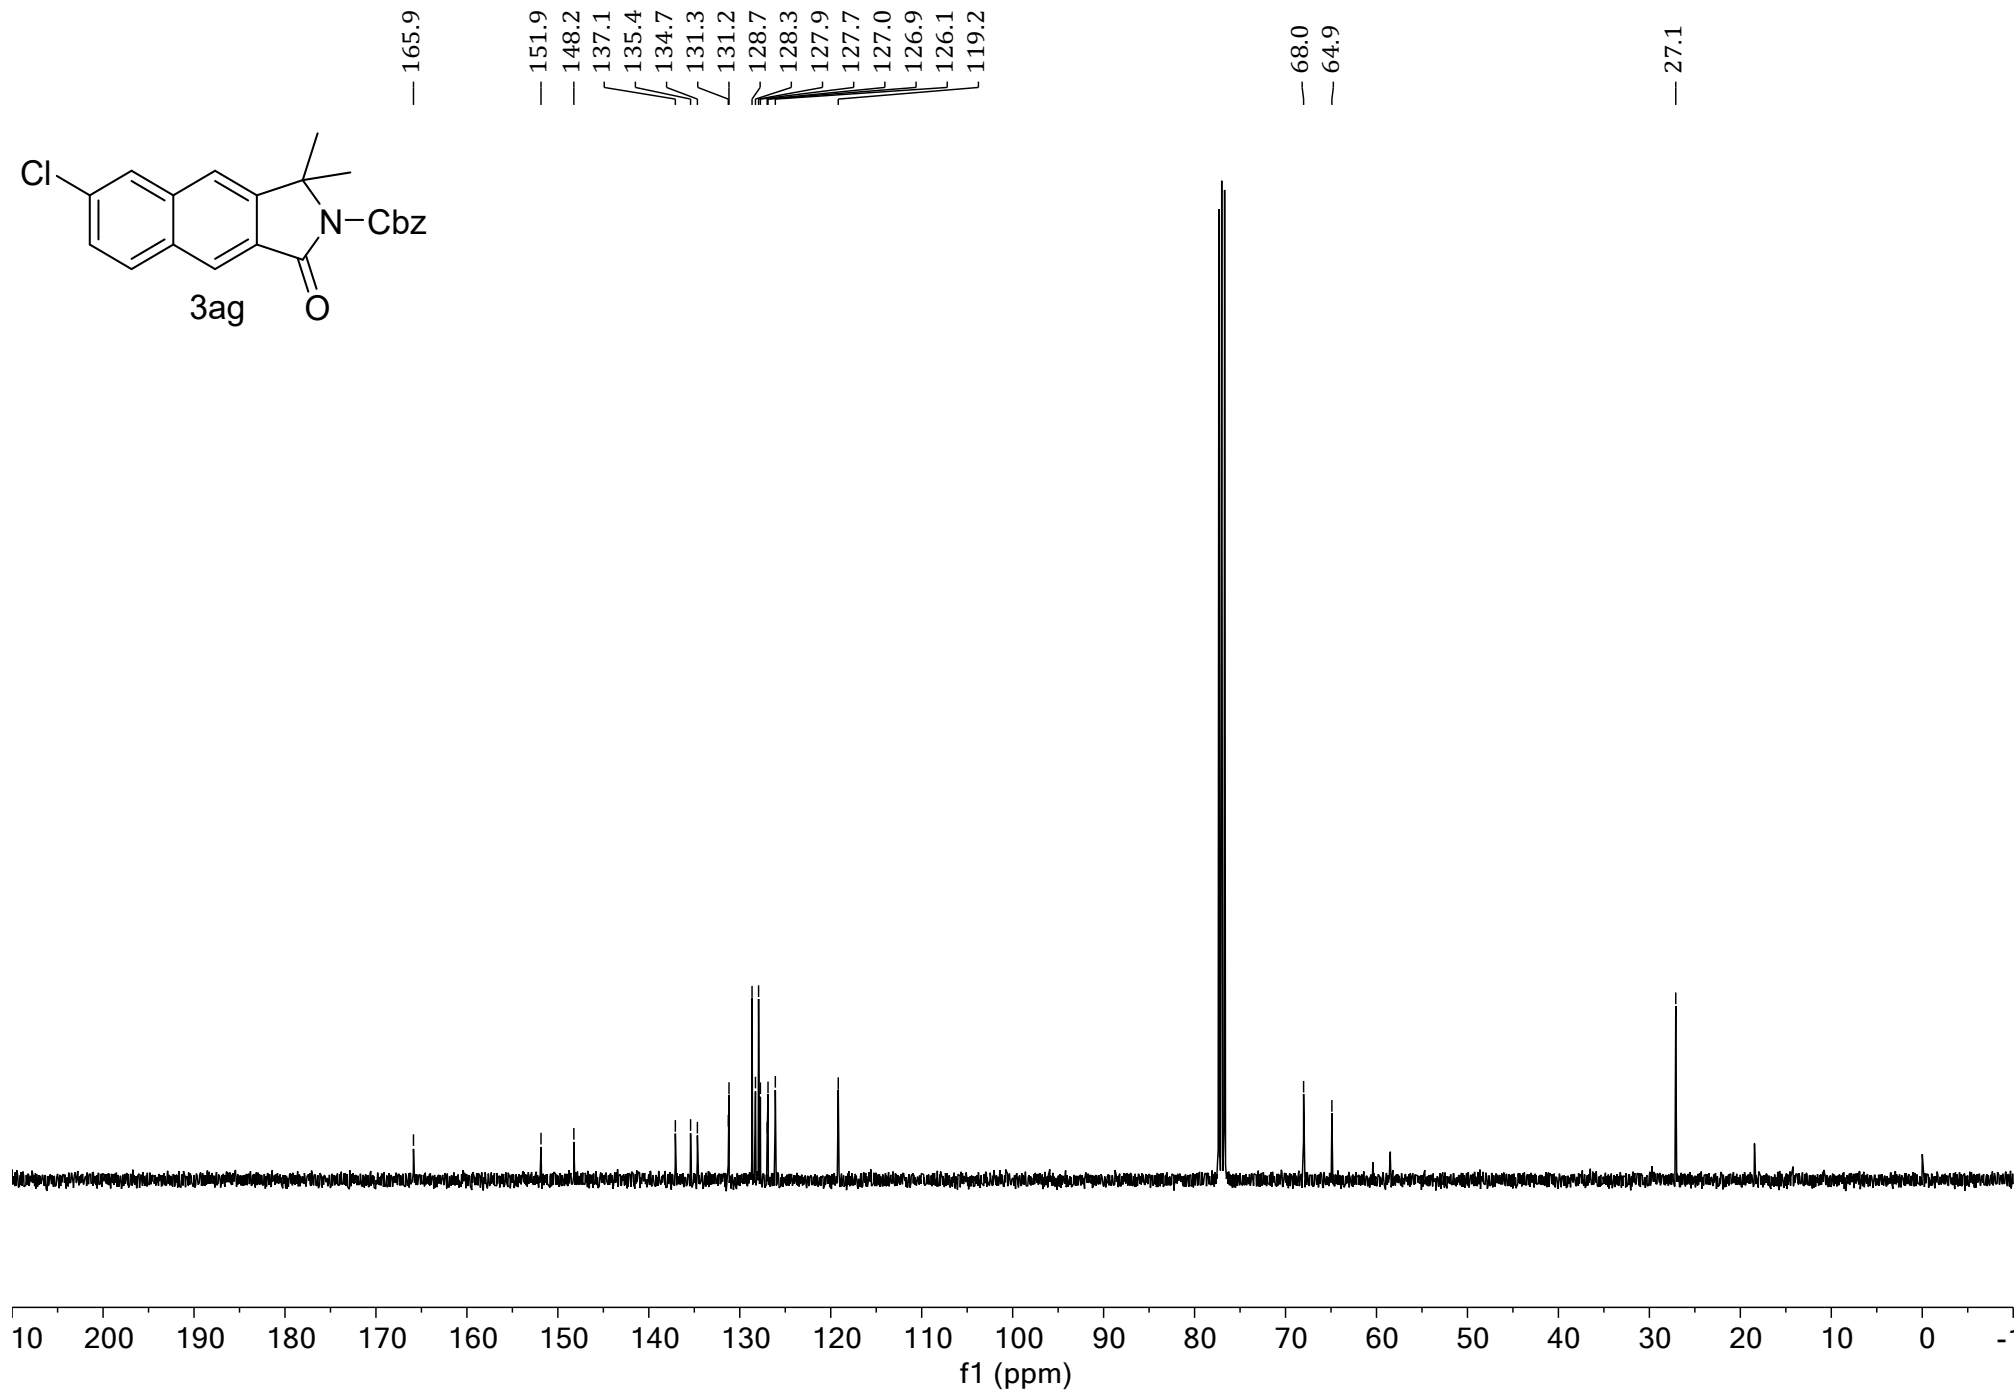

<sup>13</sup>C NMR (100 MHz, CDCl<sub>3</sub>) spectra of **3ag**.

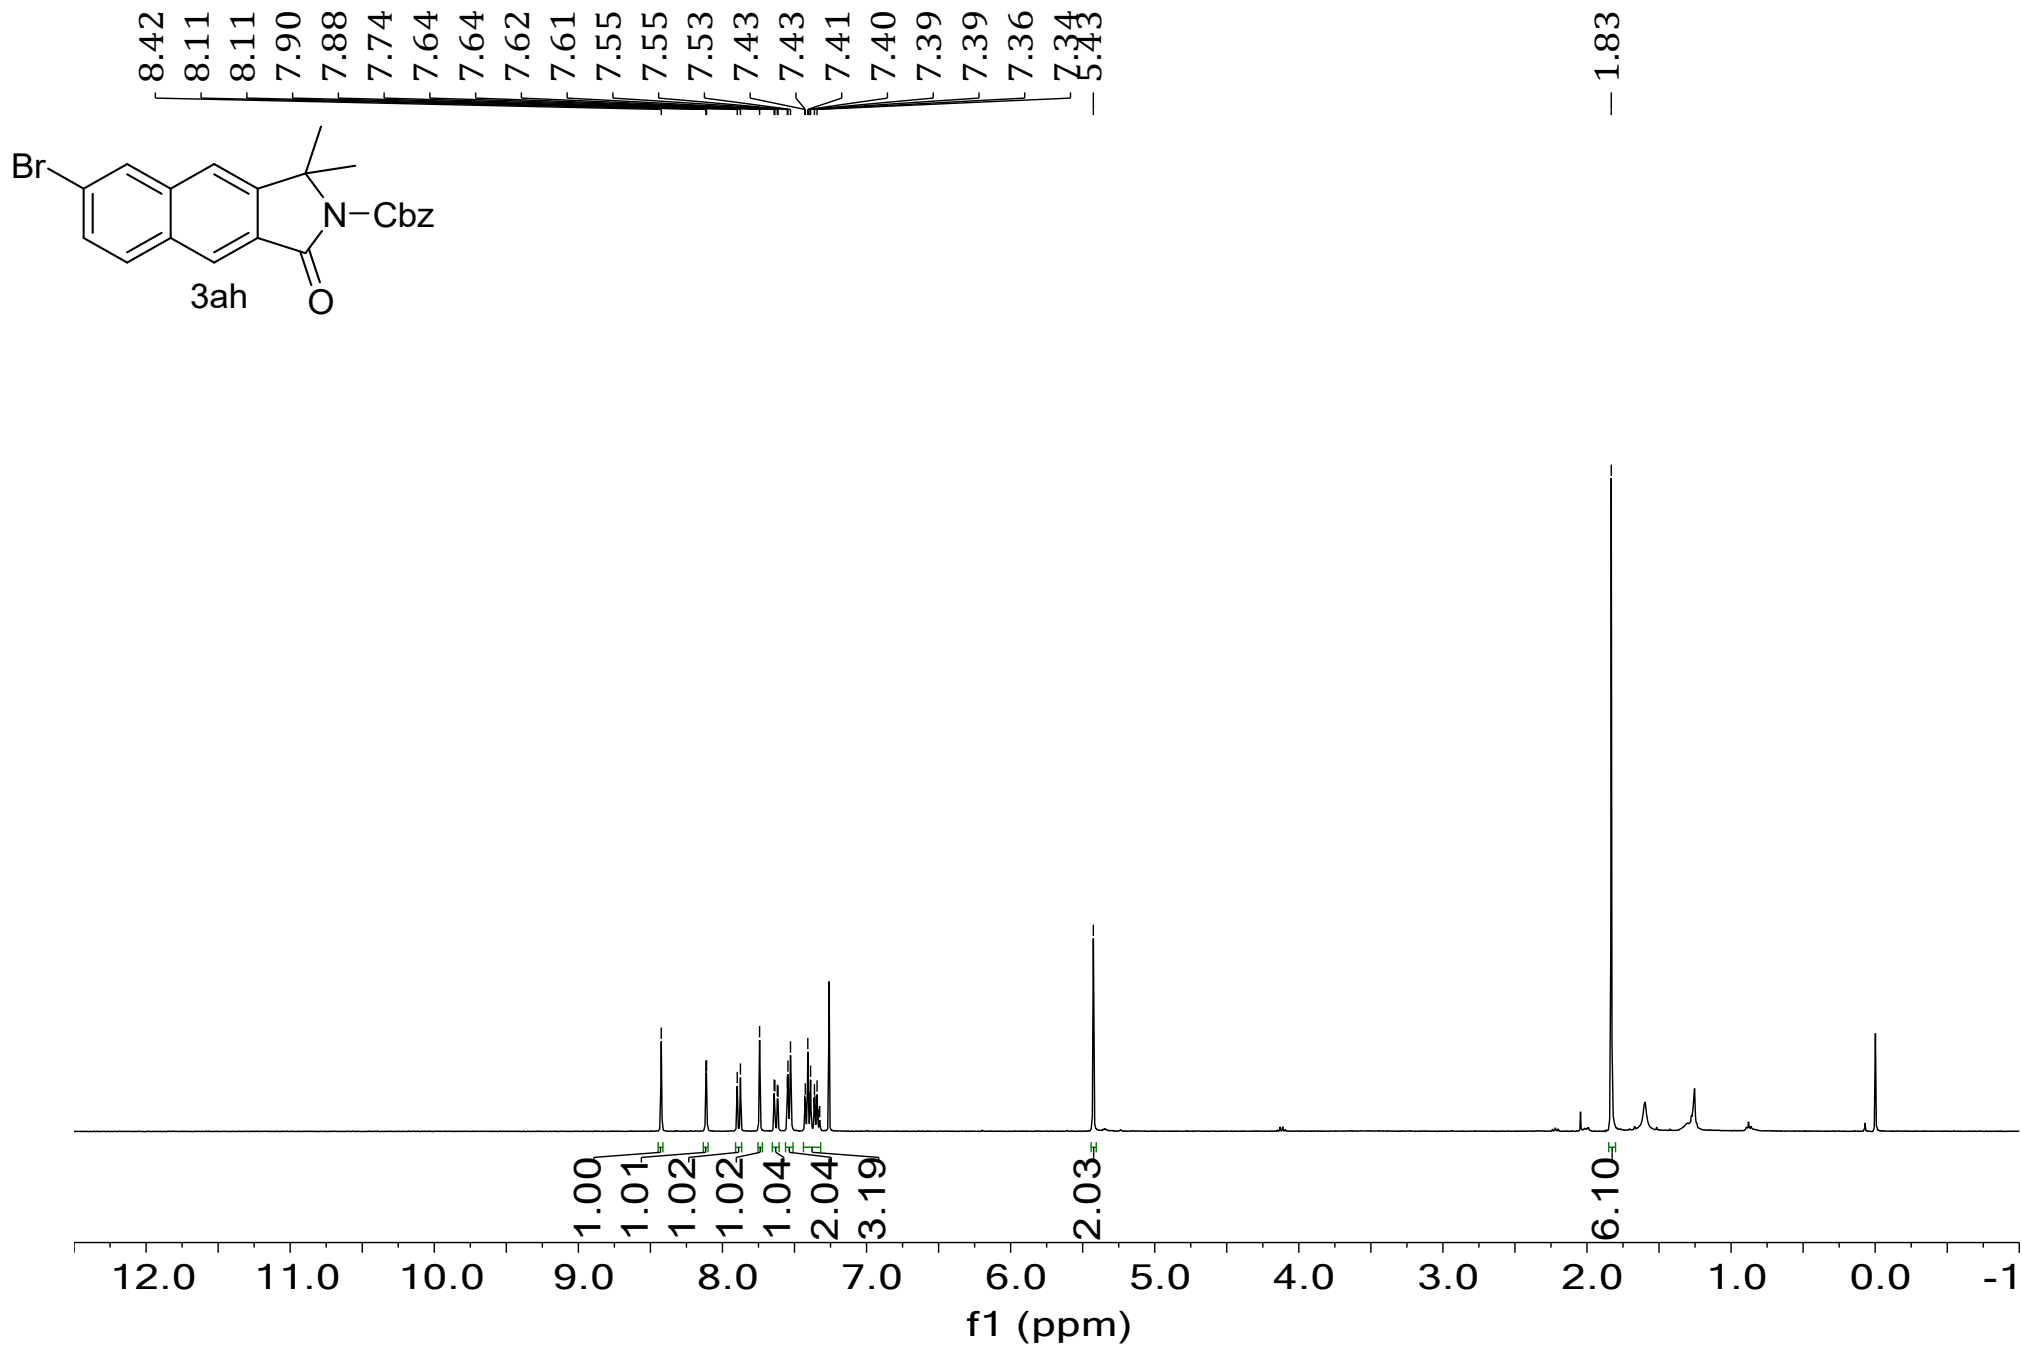

$^1\text{H NMR}$  (400 MHz,  $\text{CDCl}_3$ ) spectra of **3ah**.

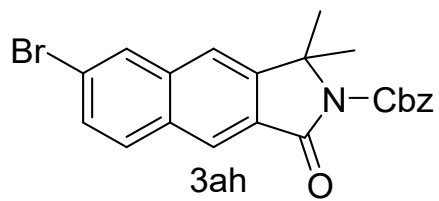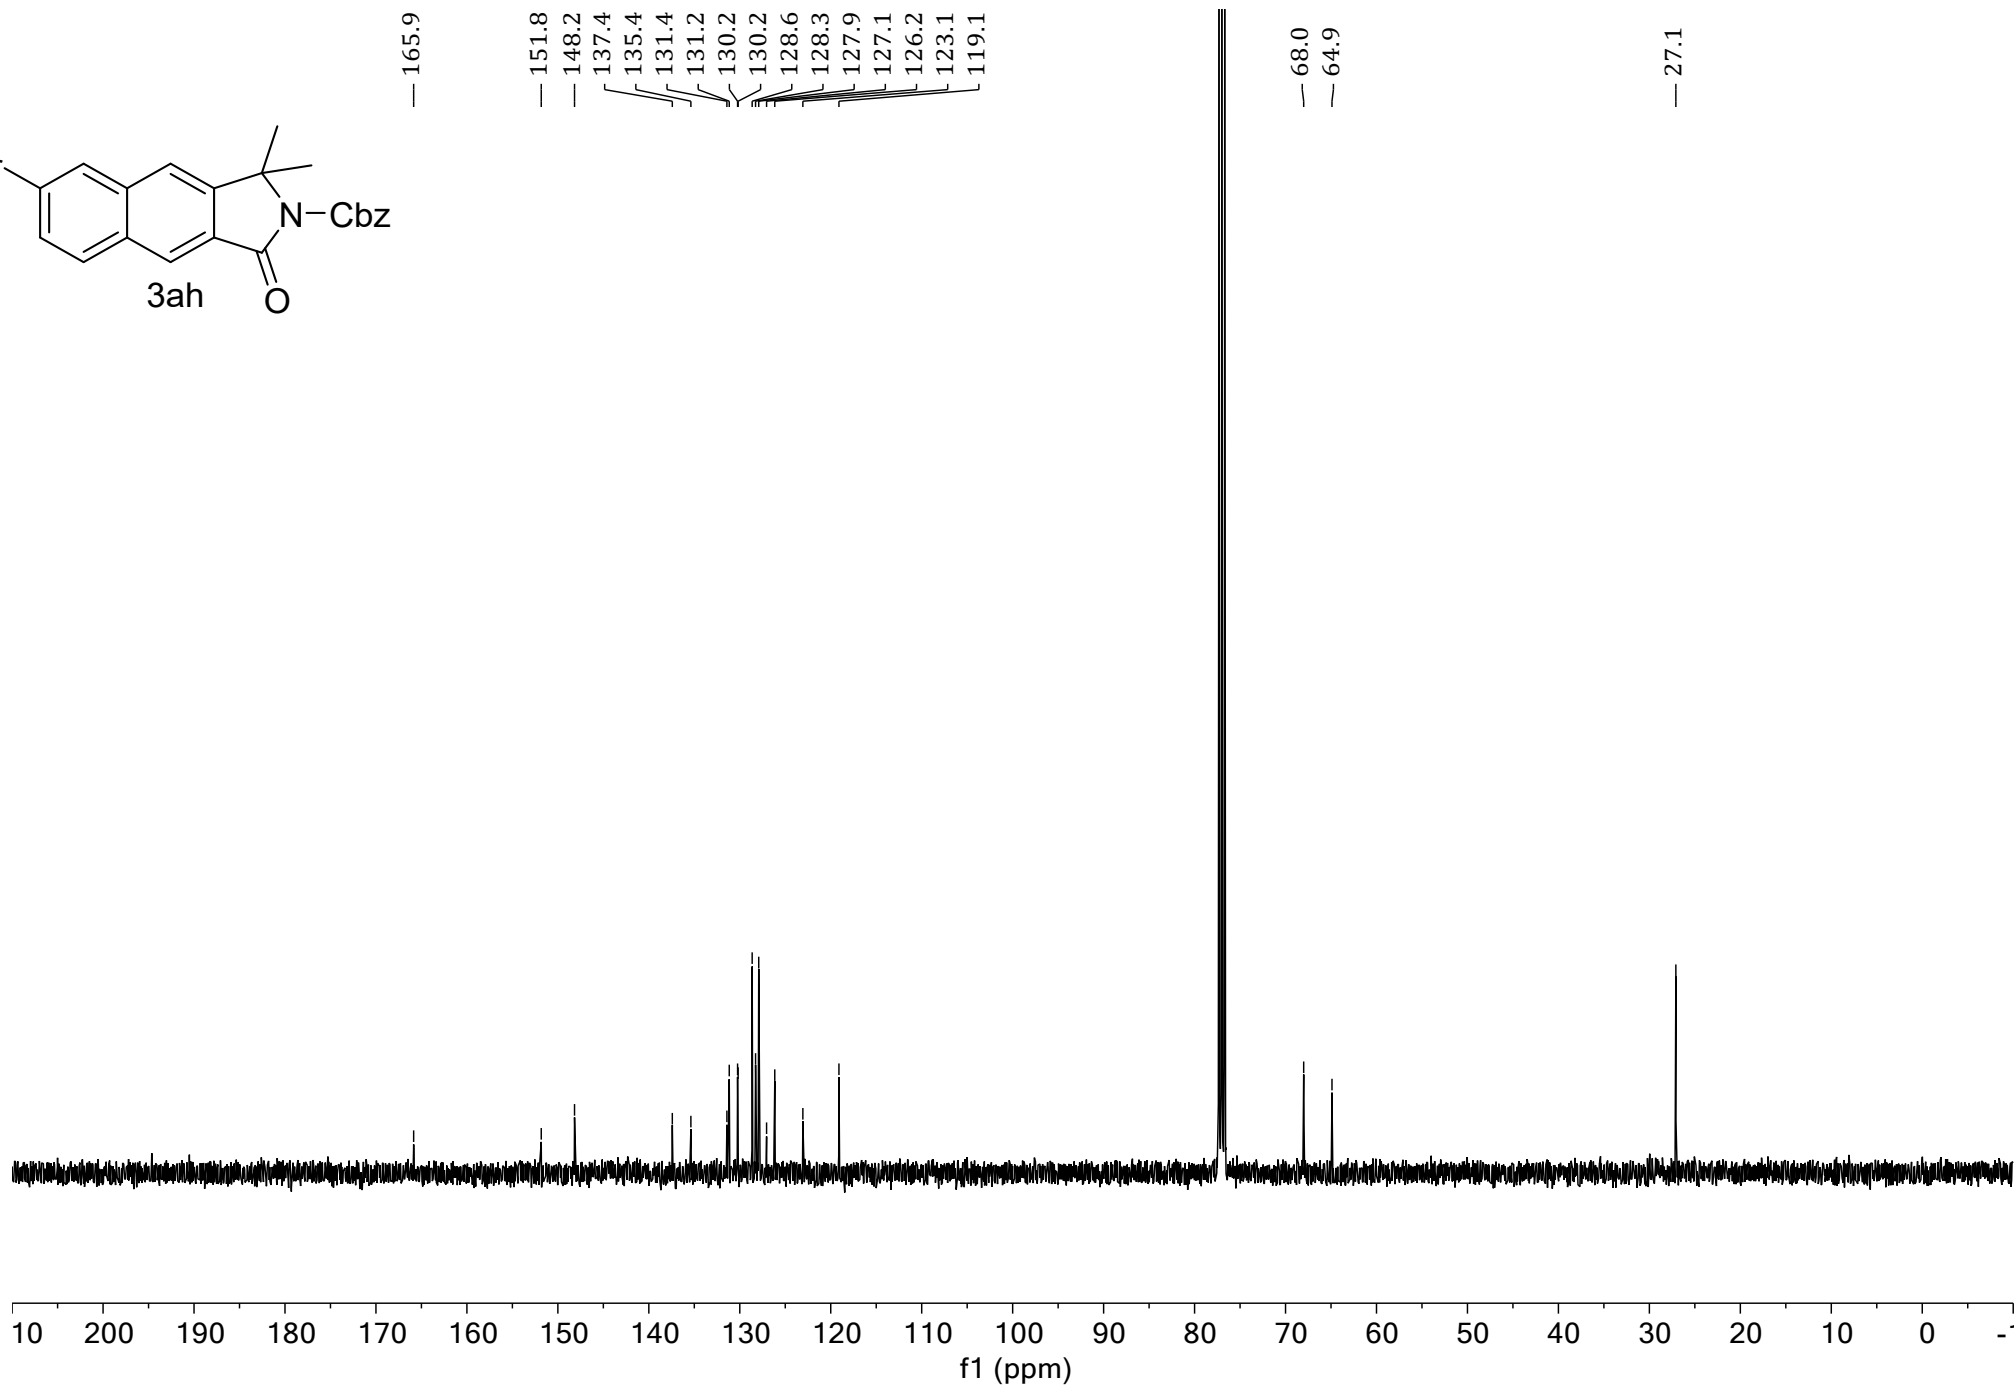

<sup>13</sup>C NMR (100 MHz, CDCl<sub>3</sub>) spectra of **3ah**.



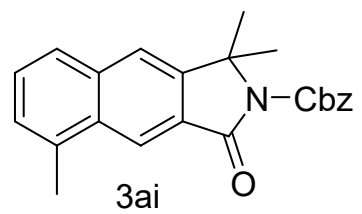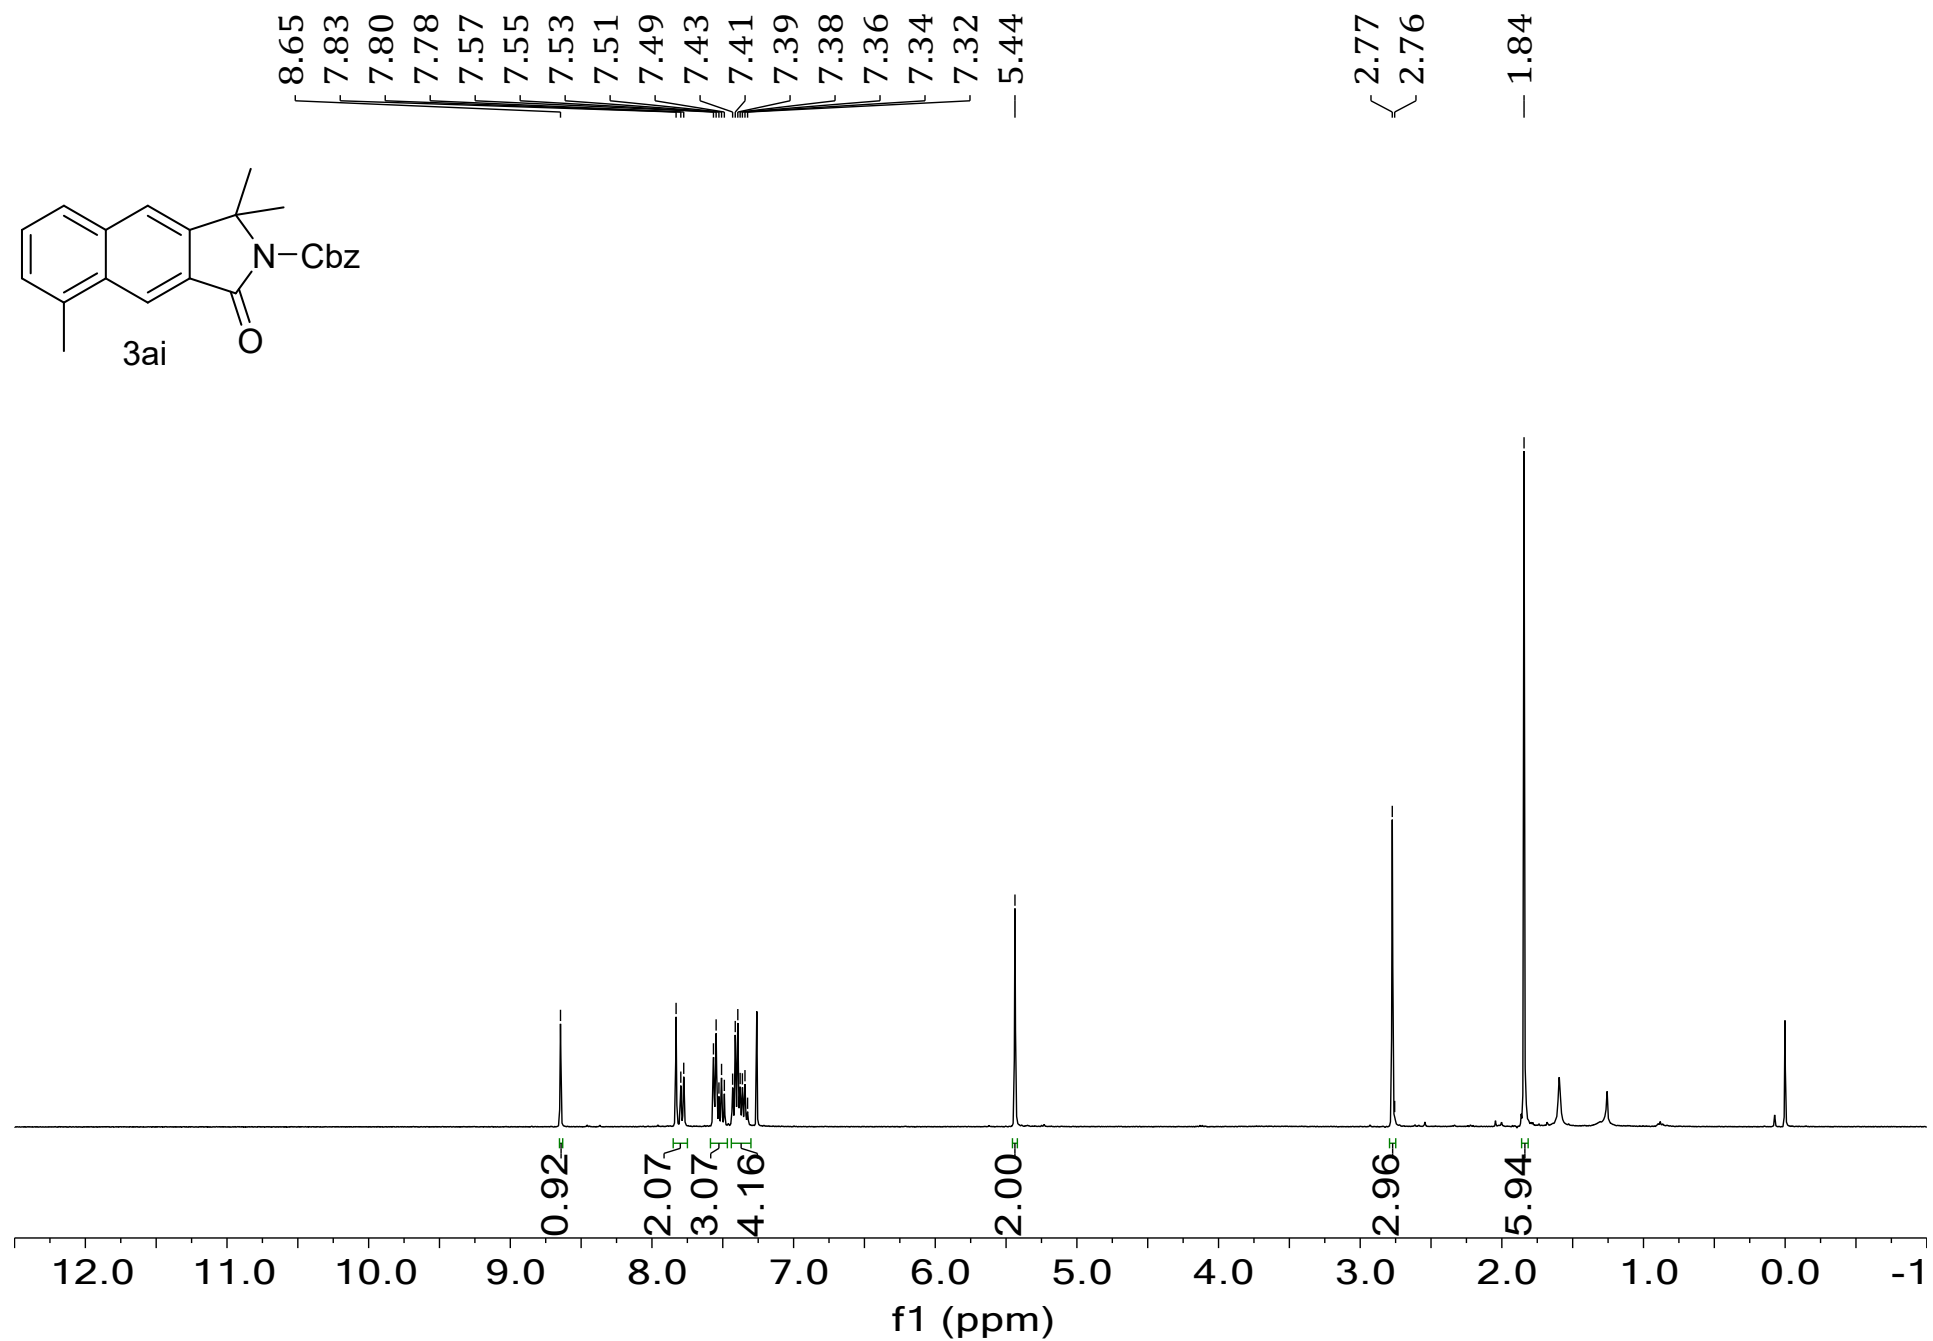

$^1\text{H}$  NMR (400 MHz,  $\text{CDCl}_3$ ) spectra of **3ai**.

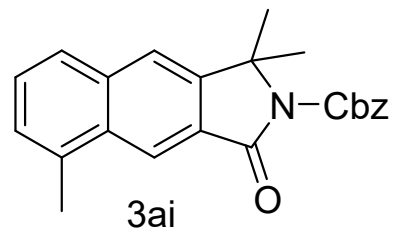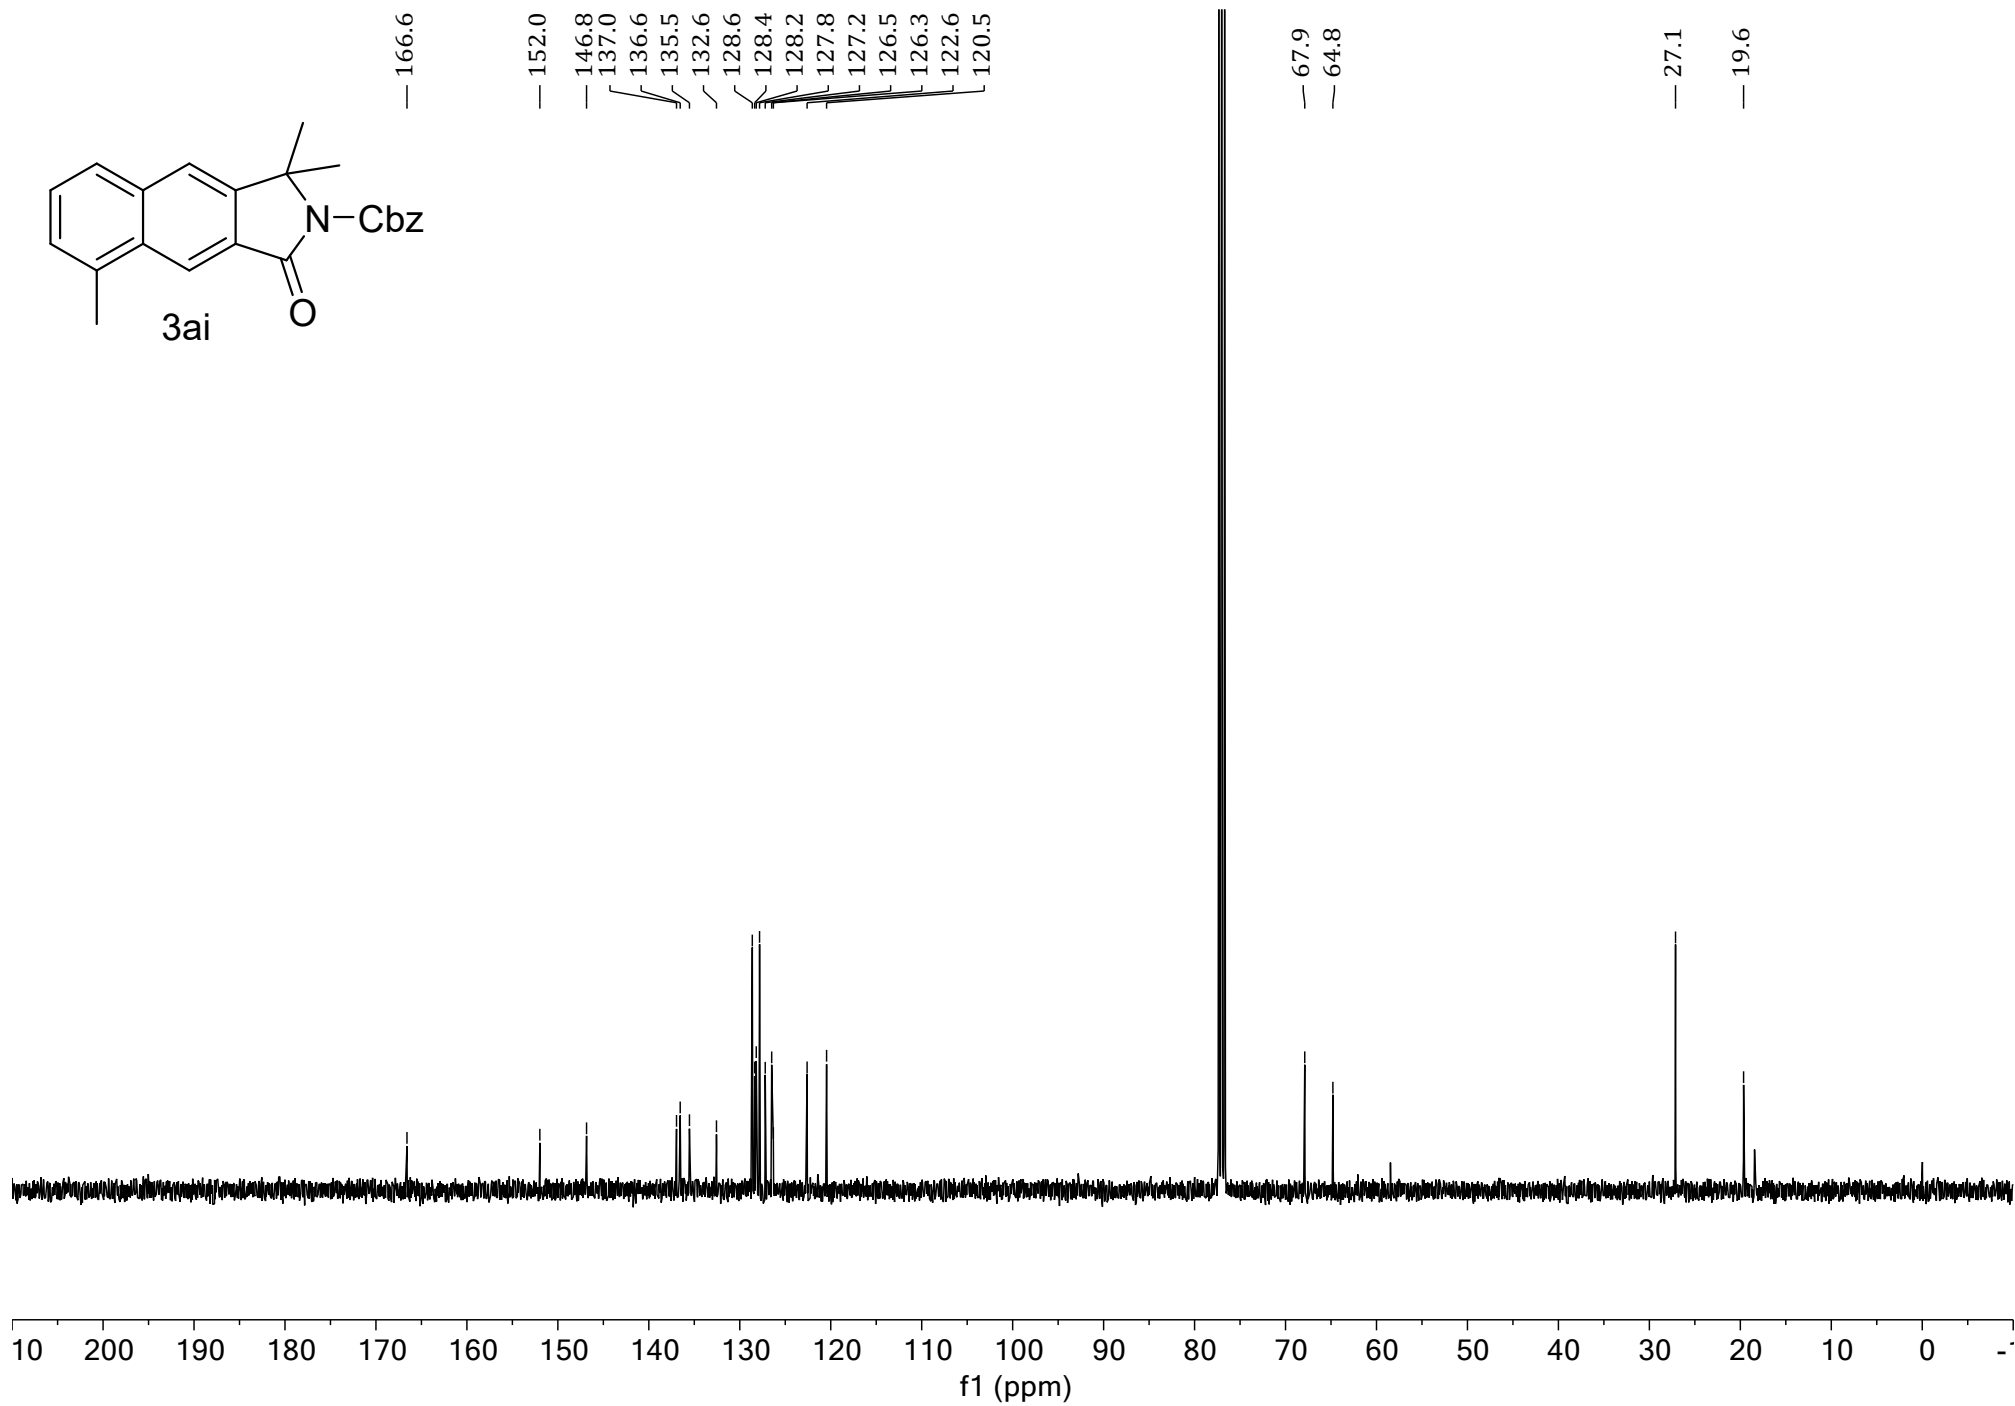

**13C NMR (100 MHz, CDCl<sub>3</sub>) spectra of **3ai**.**

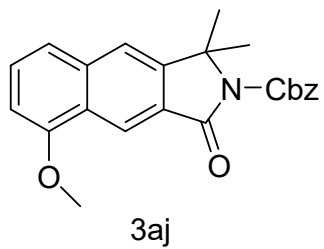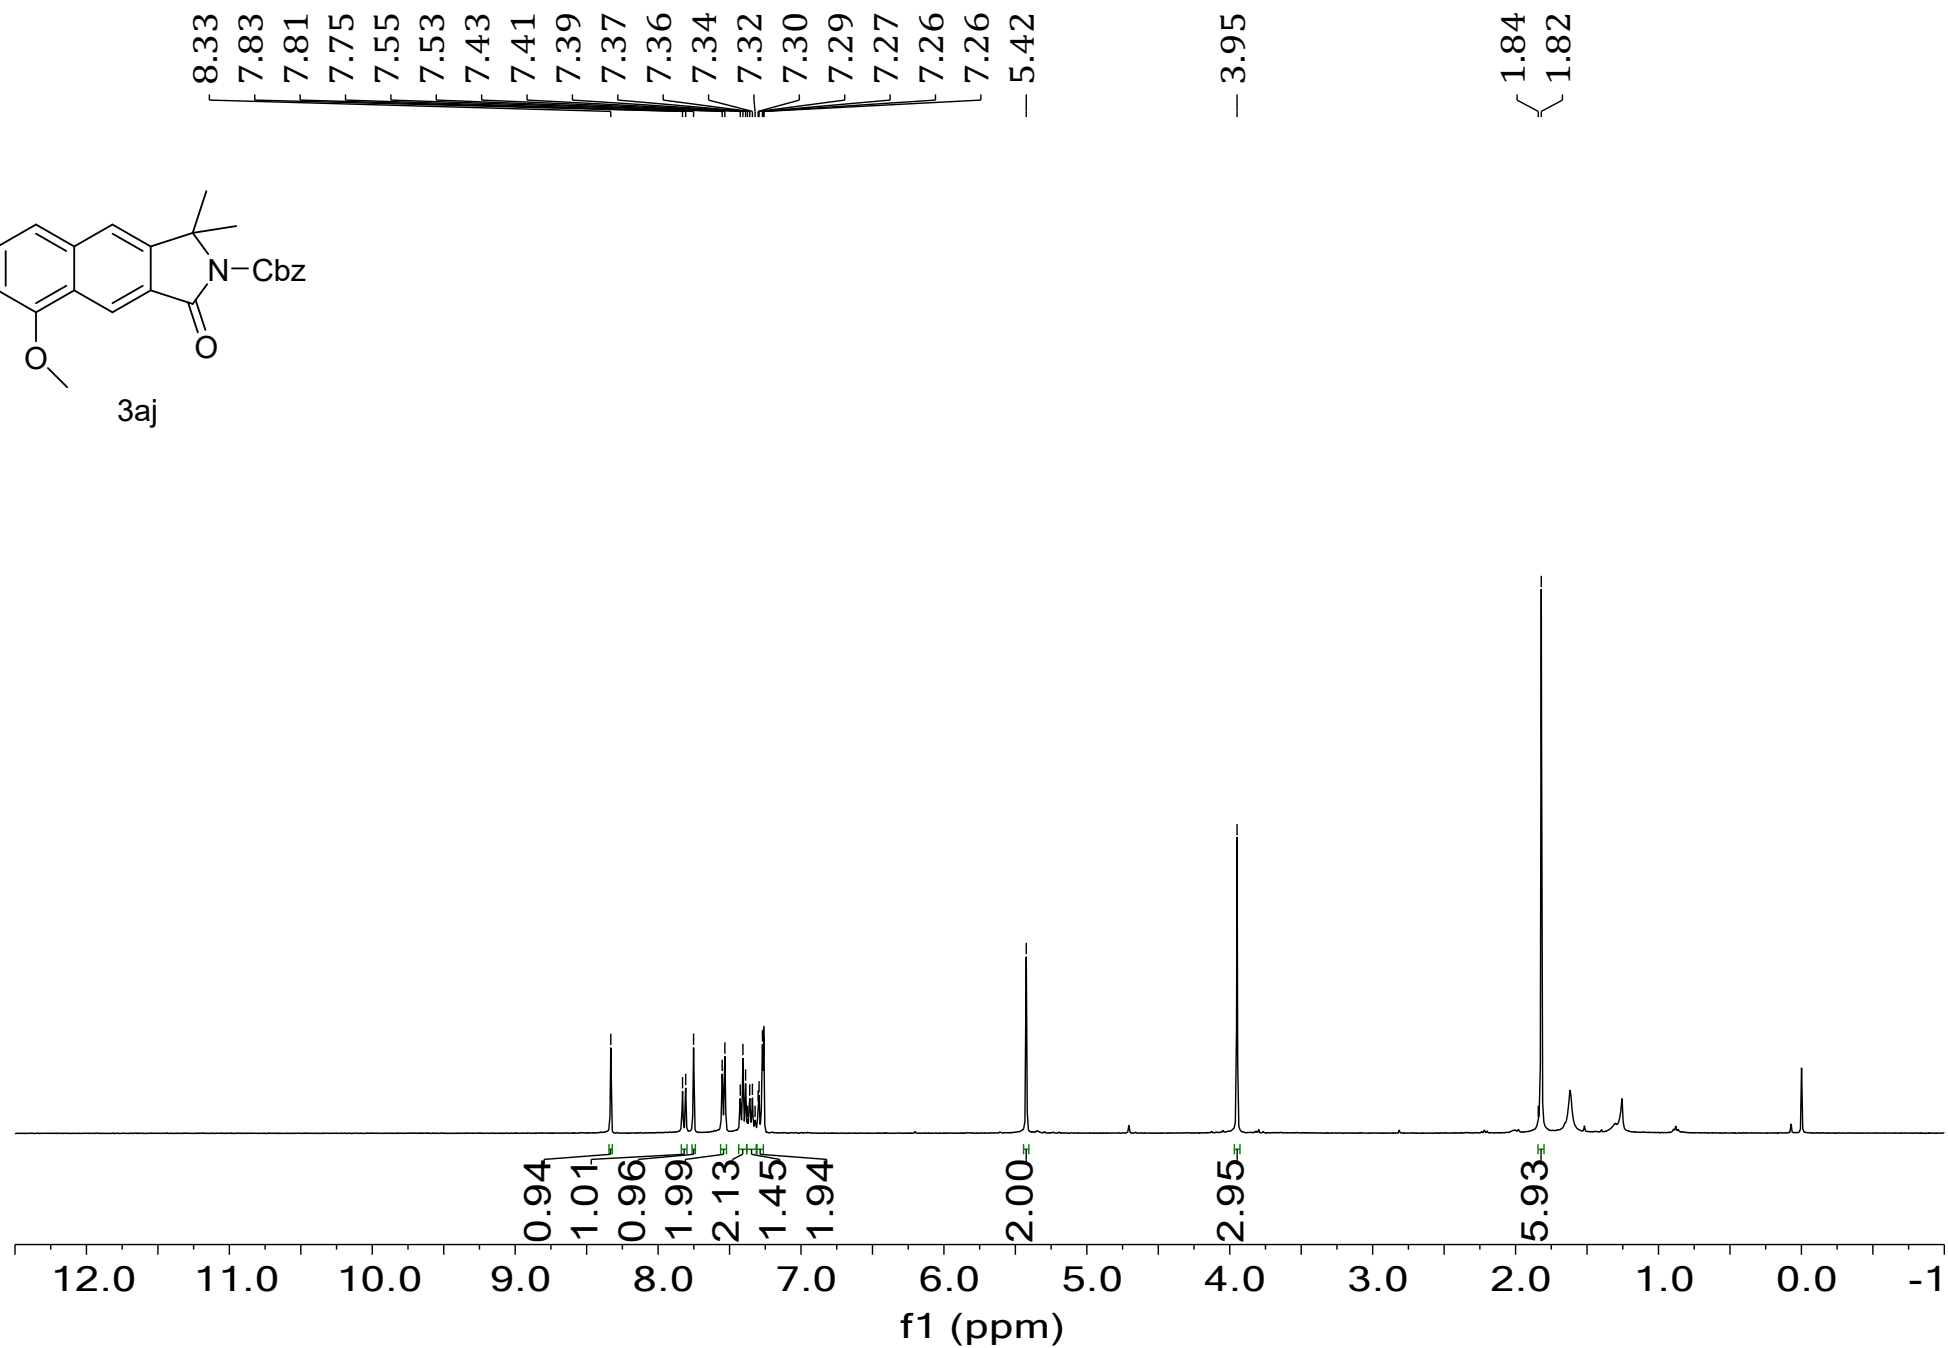

<sup>1</sup>H NMR (400 MHz, CDCl<sub>3</sub>) spectra of **3aj**.

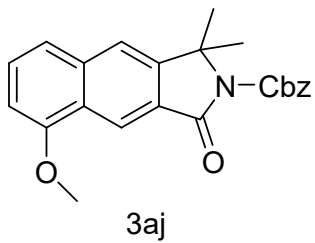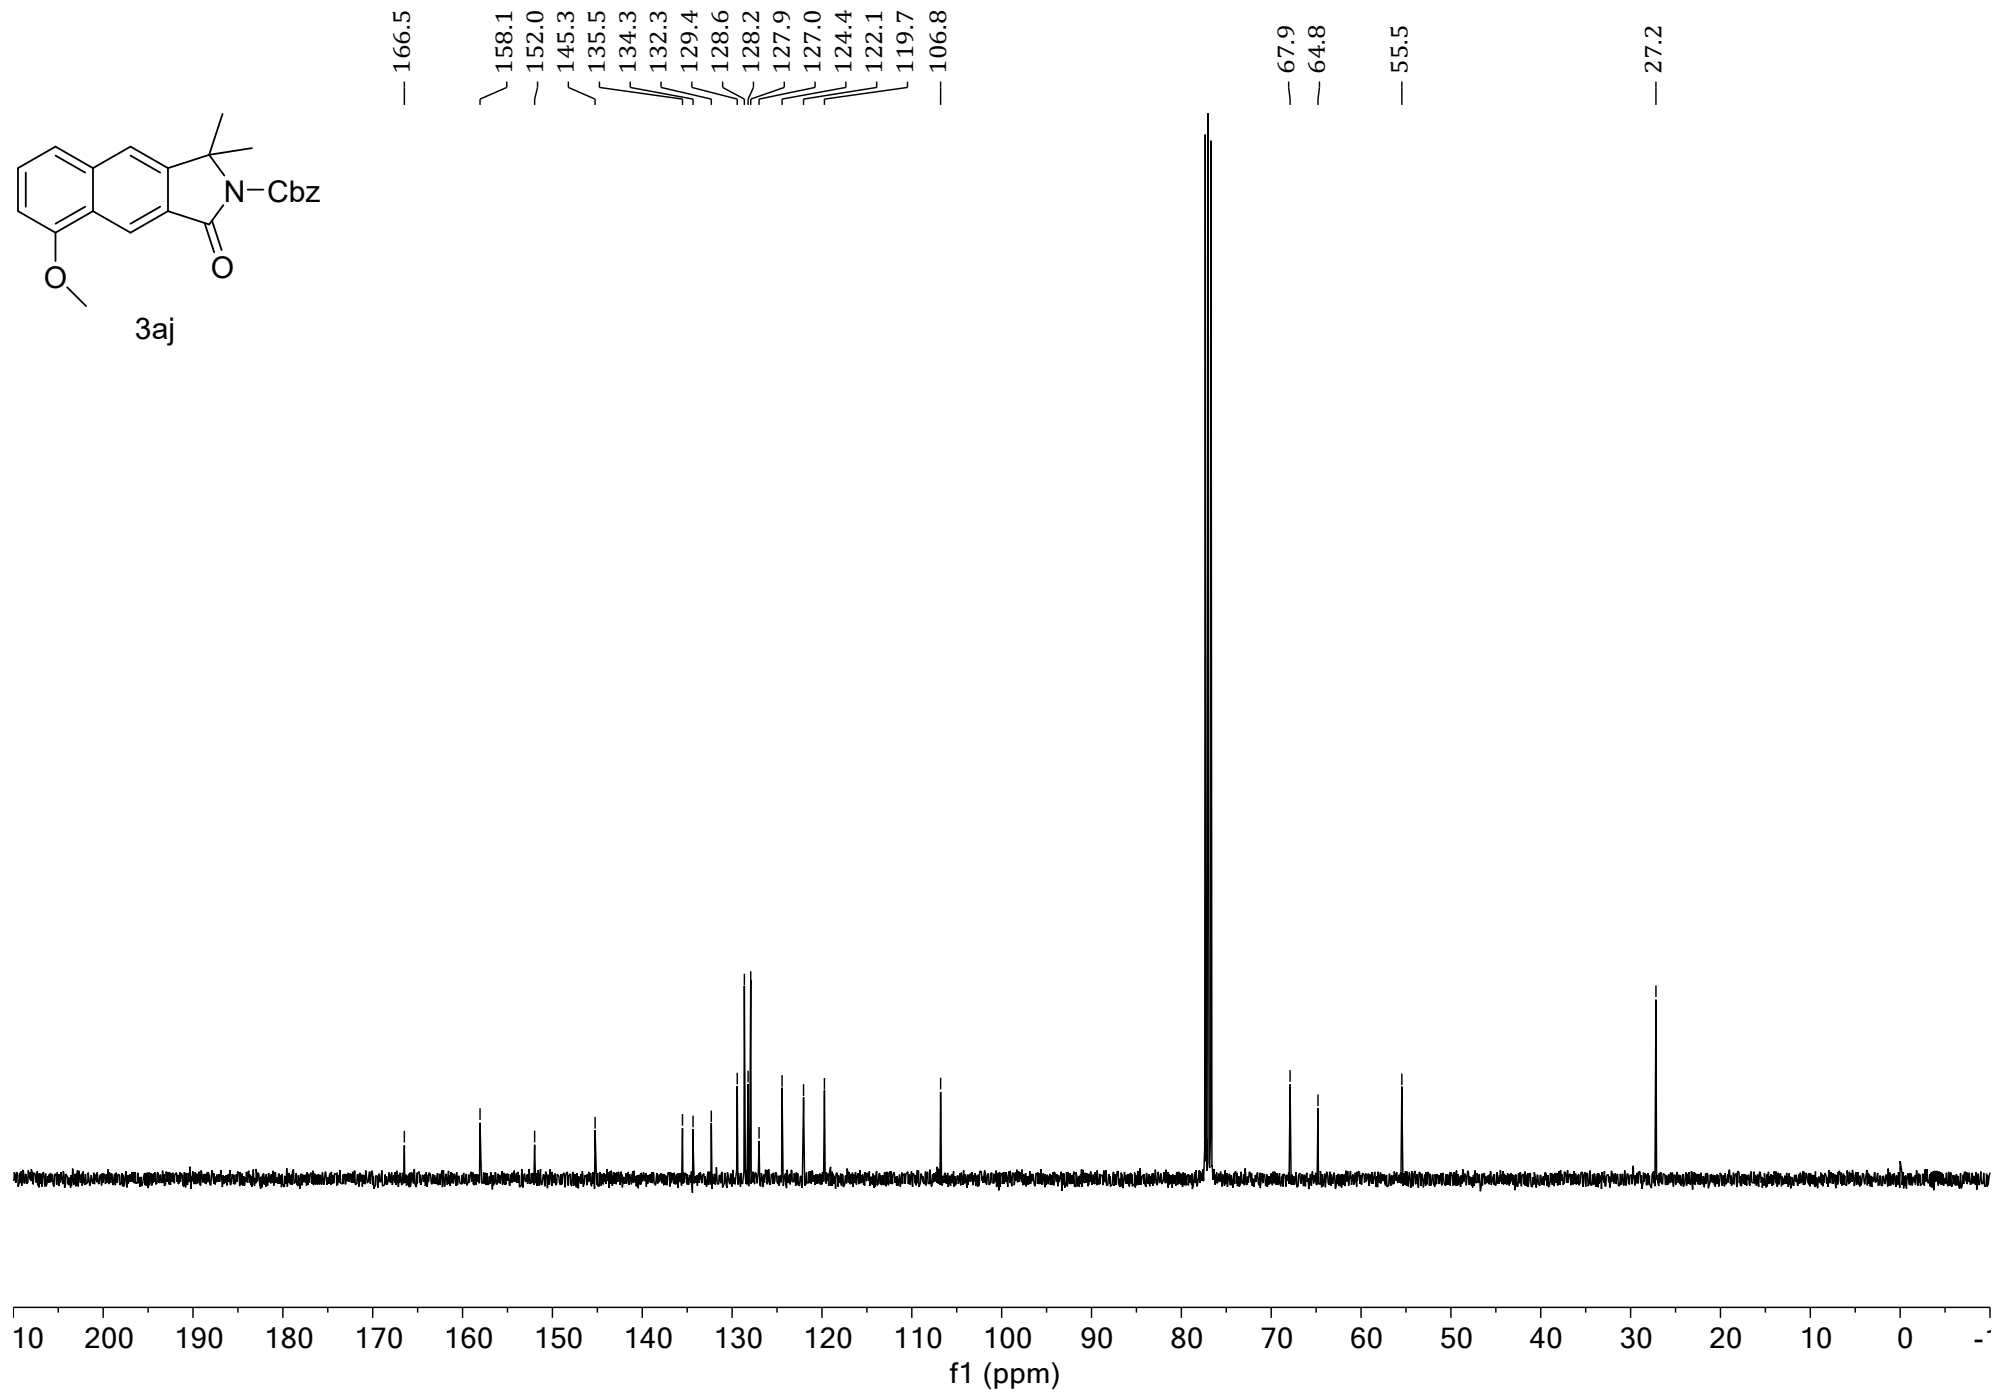

<sup>13</sup>C NMR (100 MHz, CDCl<sub>3</sub>) spectra of **3aj**.

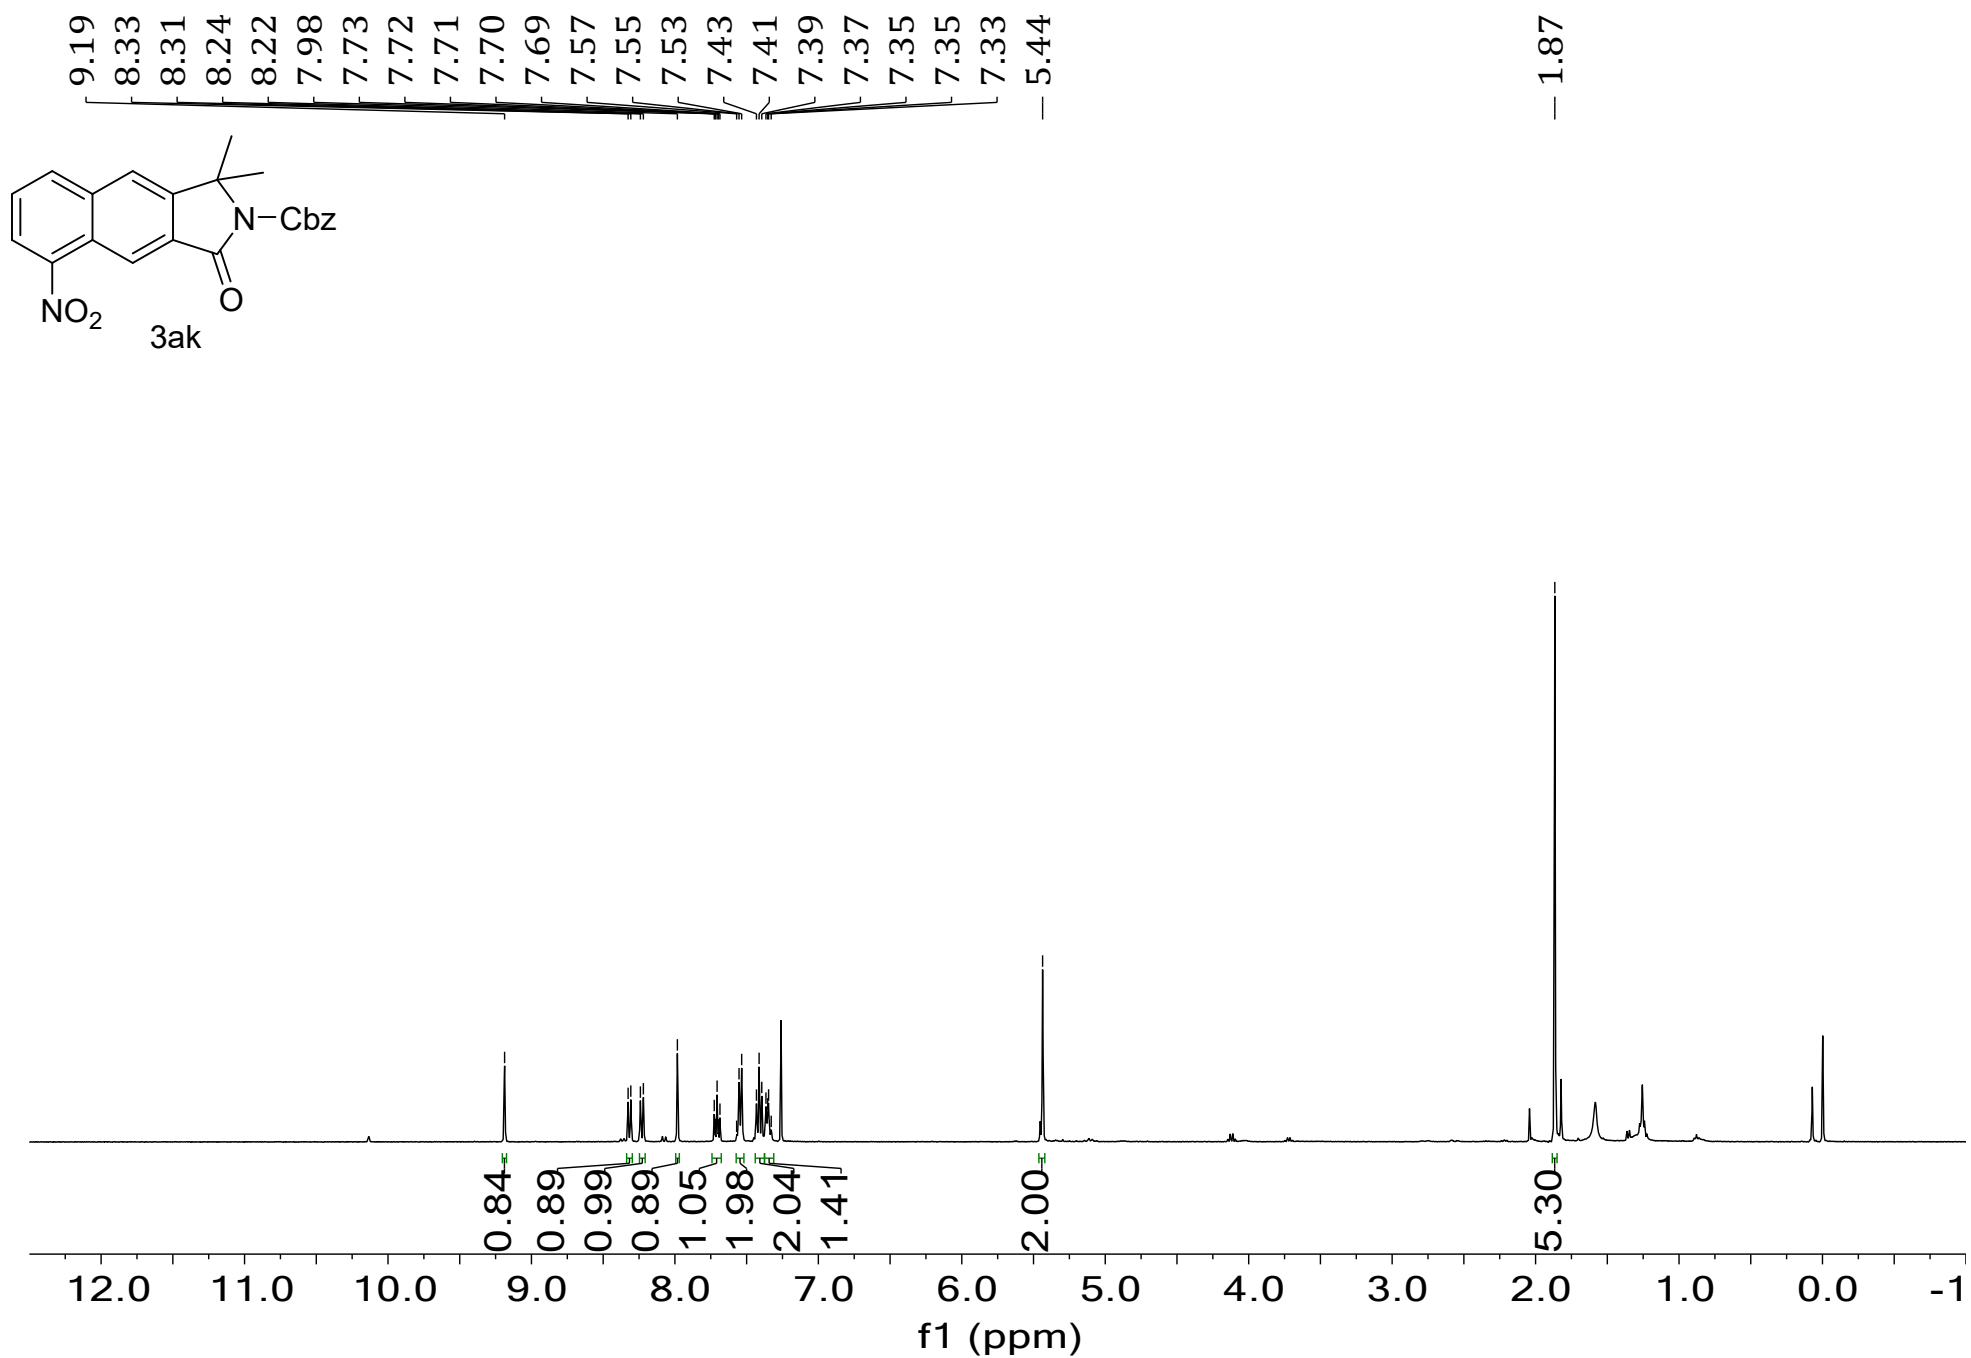

$^1\text{H}$  NMR (400 MHz,  $\text{CDCl}_3$ ) spectra of **3ak**.

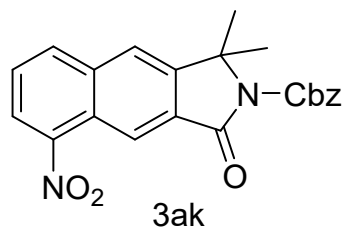

— 165.1  
151.7  
148.4  
147.7  
137.2  
135.2  
134.6  
129.7  
128.7  
128.3  
127.8  
126.6  
124.9  
124.7  
122.1  
121.0

— 68.1  
— 64.7

— 27.0

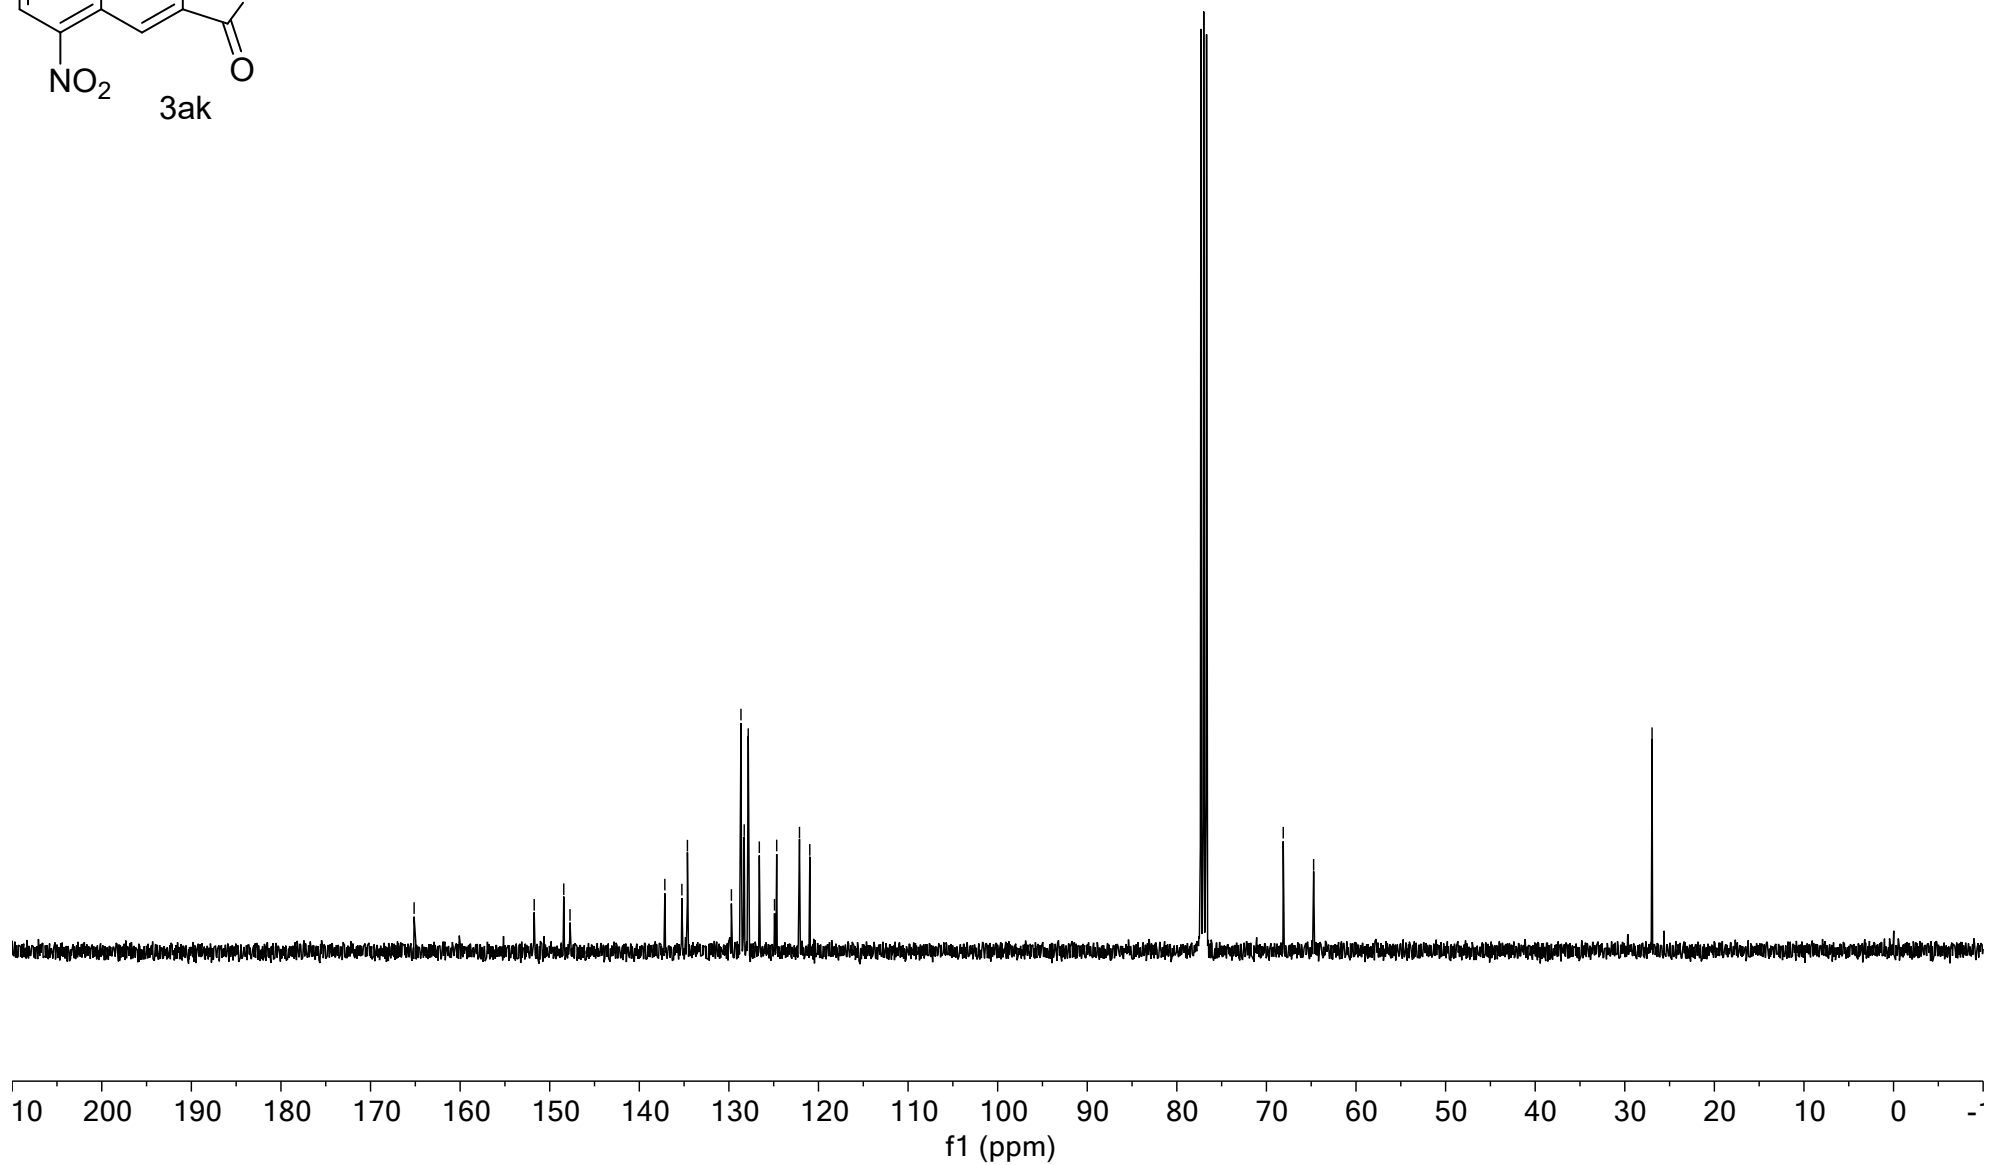

<sup>13</sup>C NMR (100 MHz, CDCl<sub>3</sub>) spectra of **3ak**.

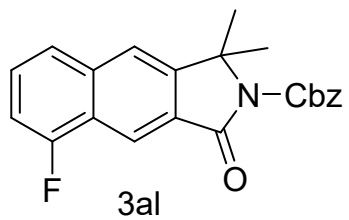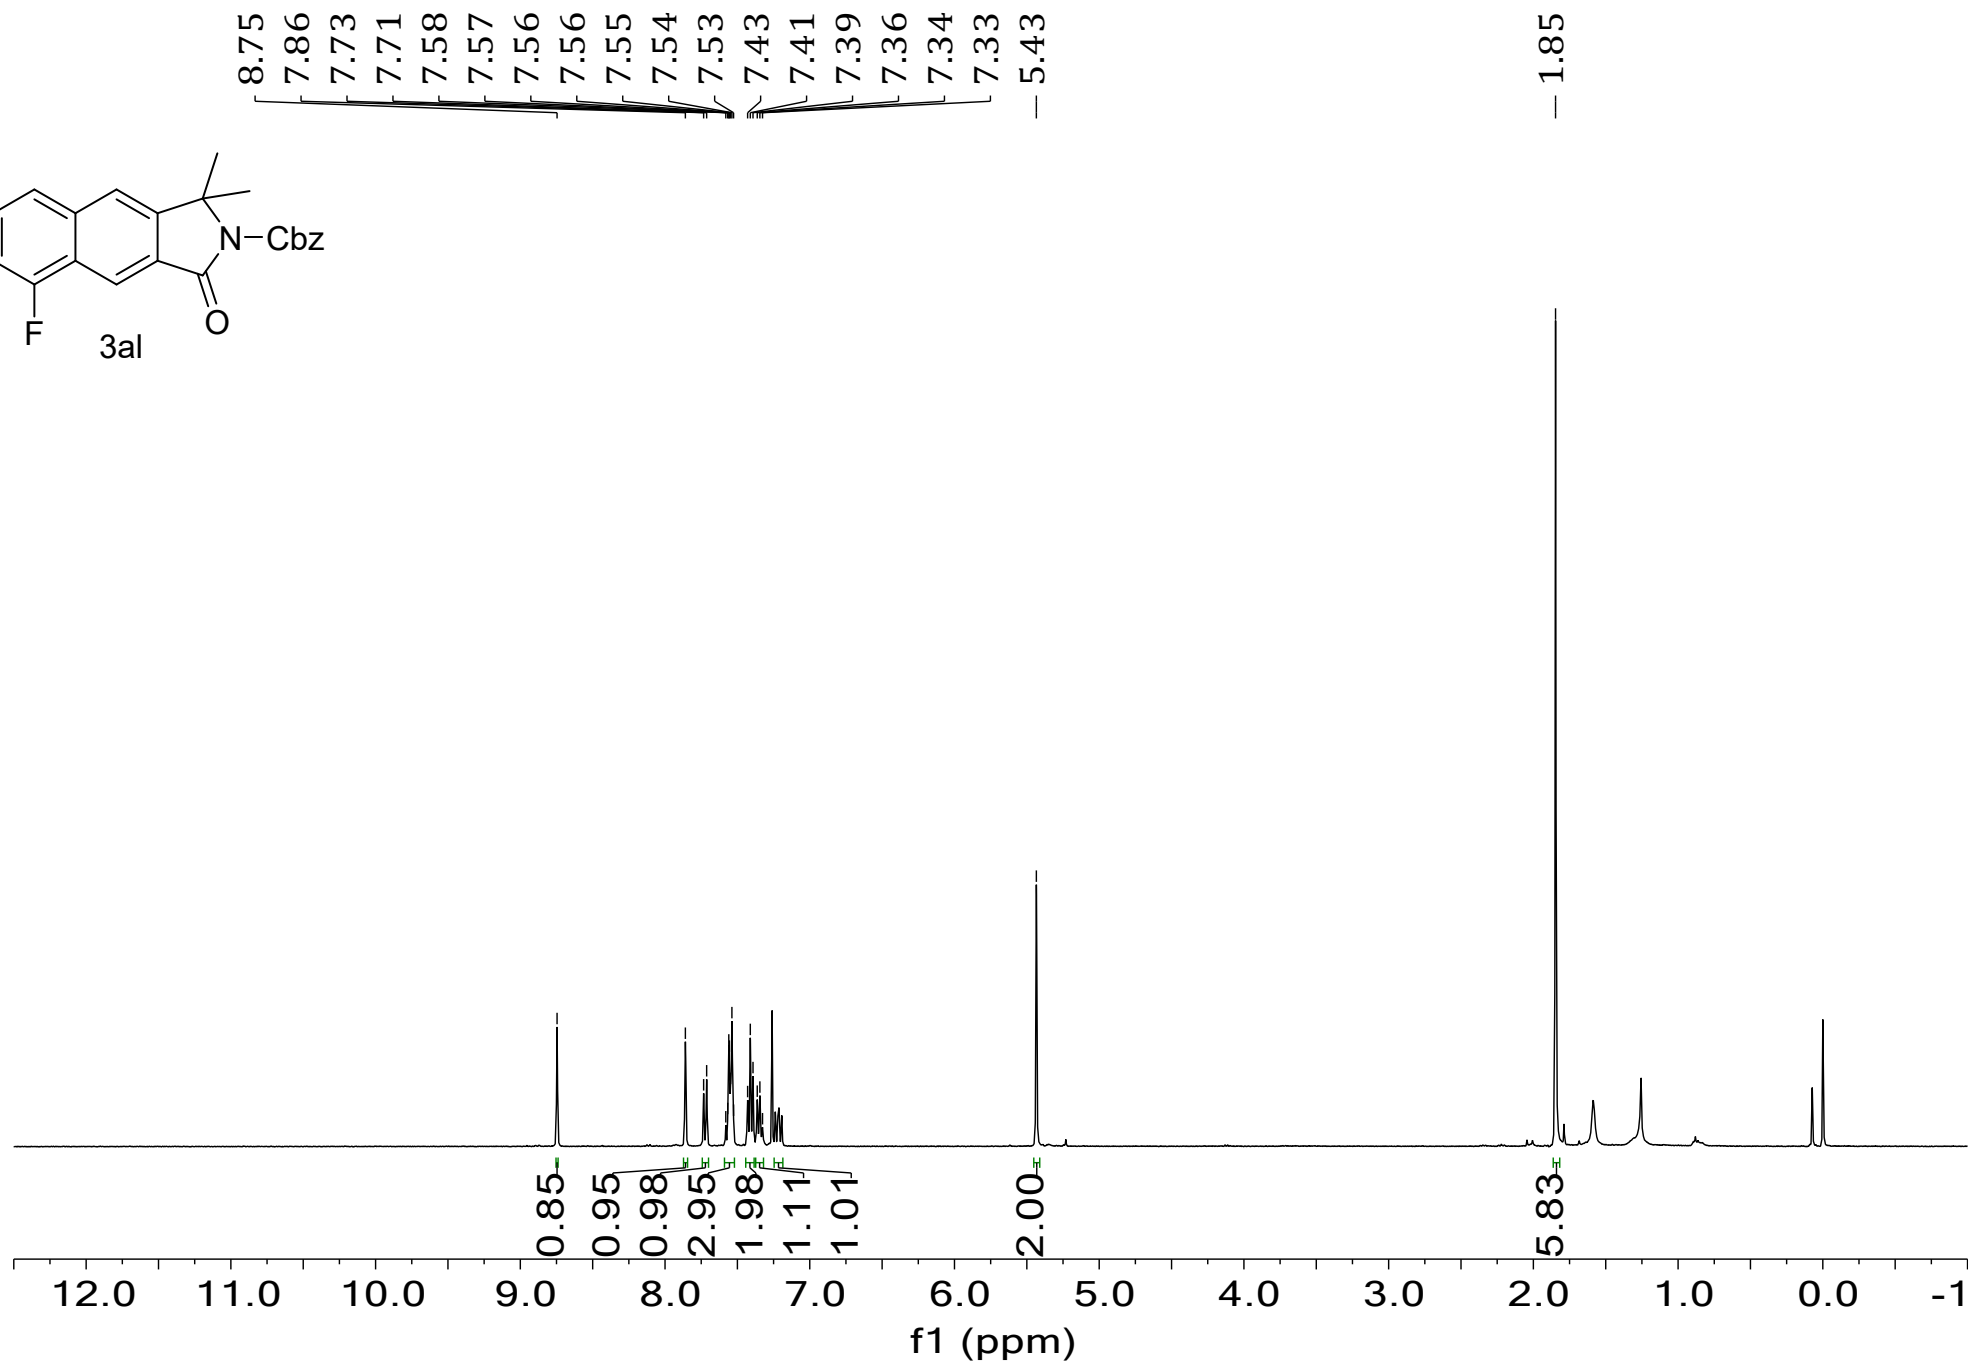

<sup>1</sup>H NMR (400 MHz, CDCl<sub>3</sub>) spectra of **3al**.

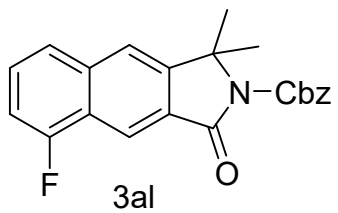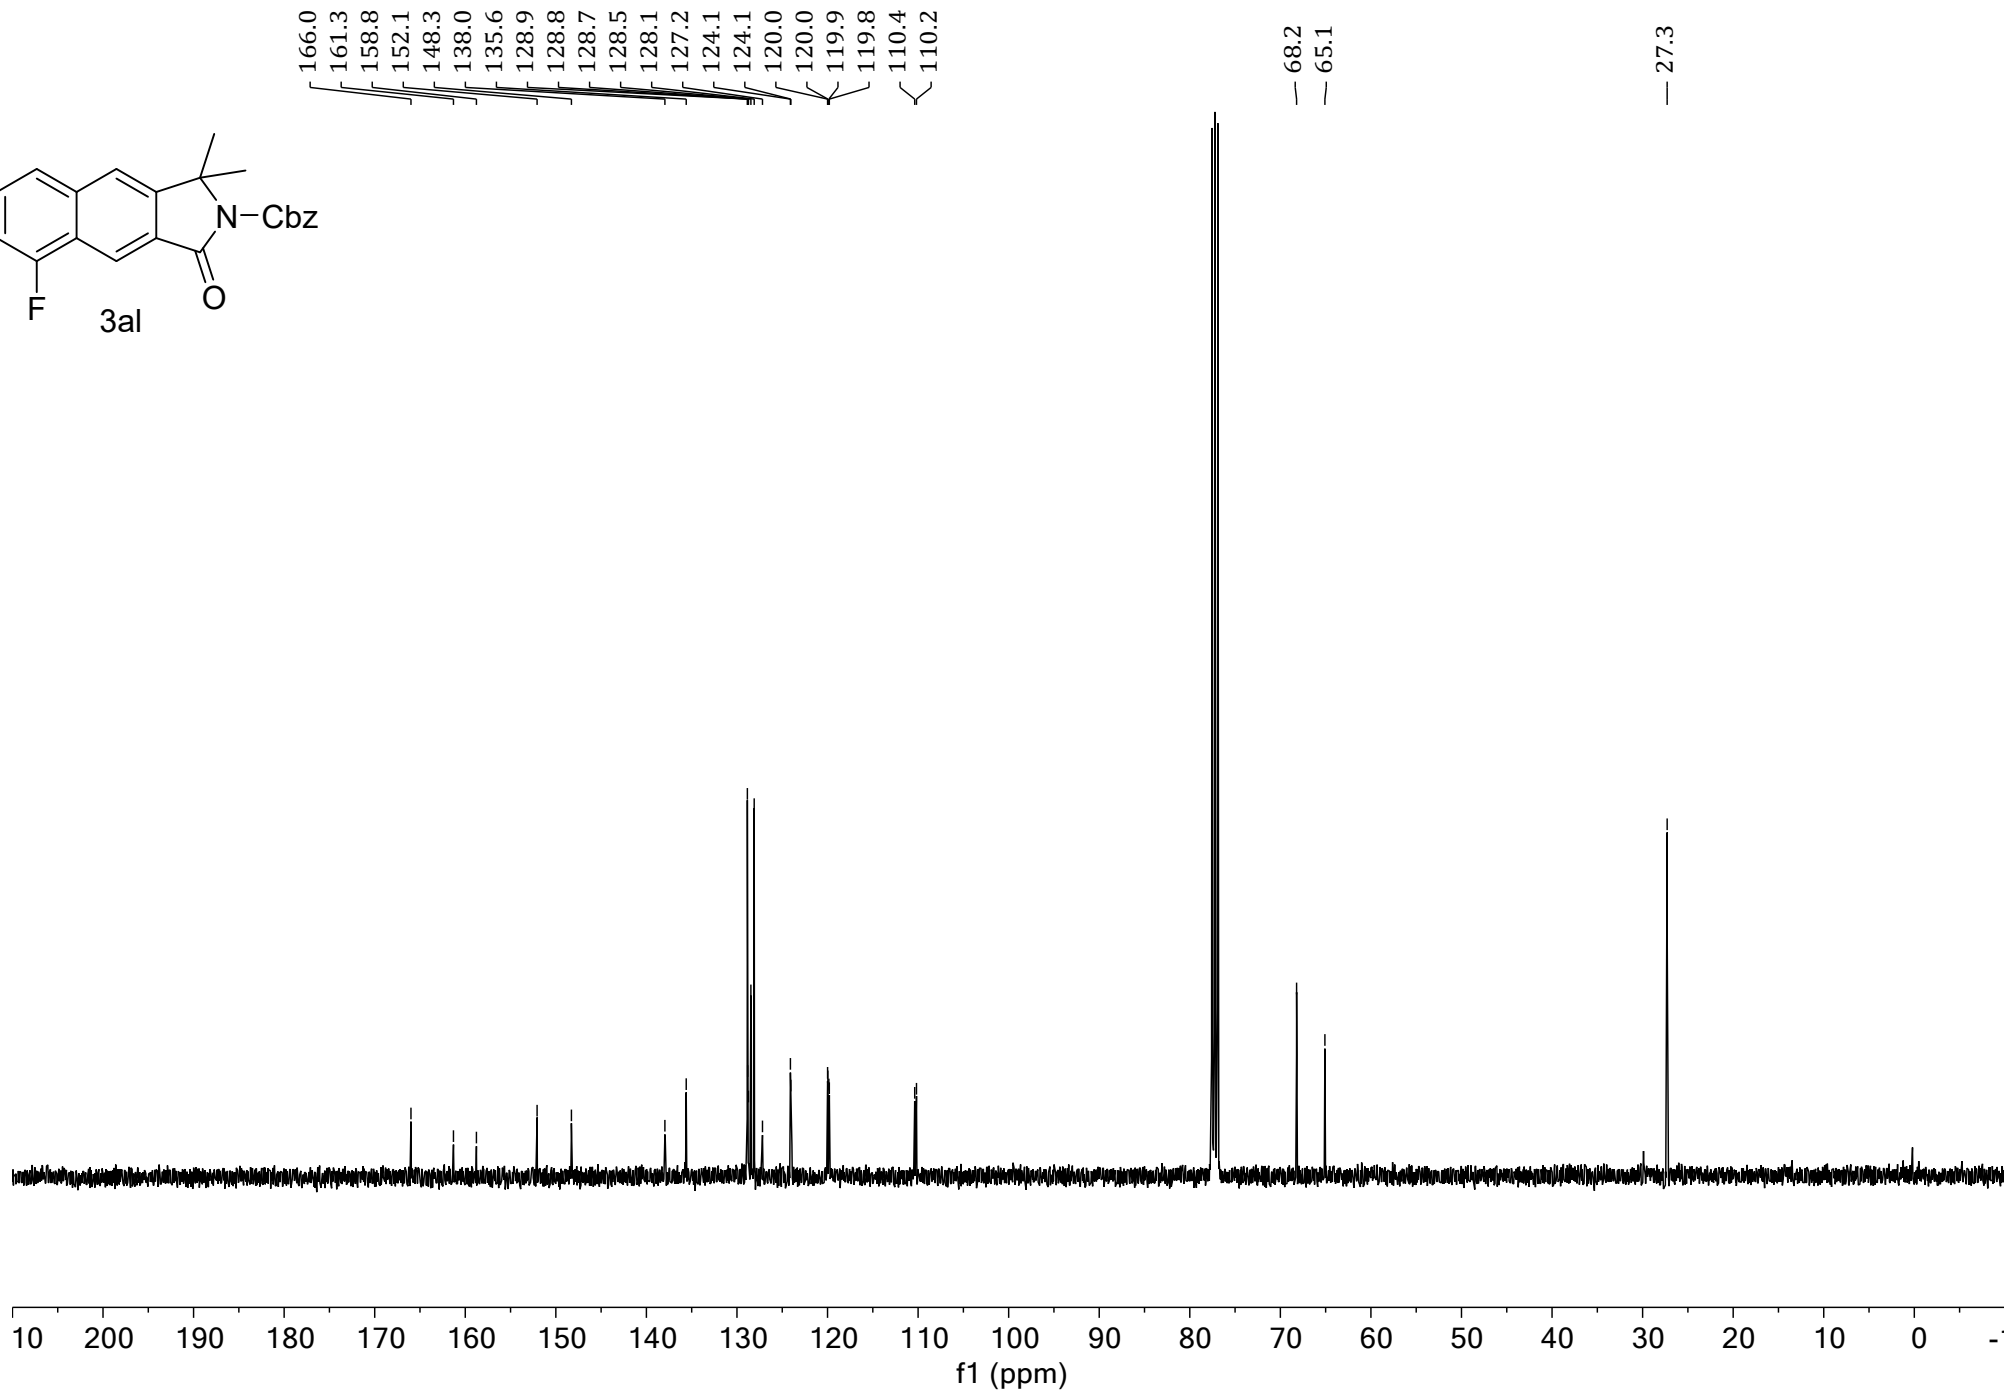

$^{13}\text{C}$  NMR (100 MHz,  $\text{CDCl}_3$ ) spectra of **3al**.



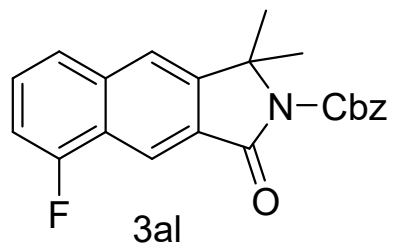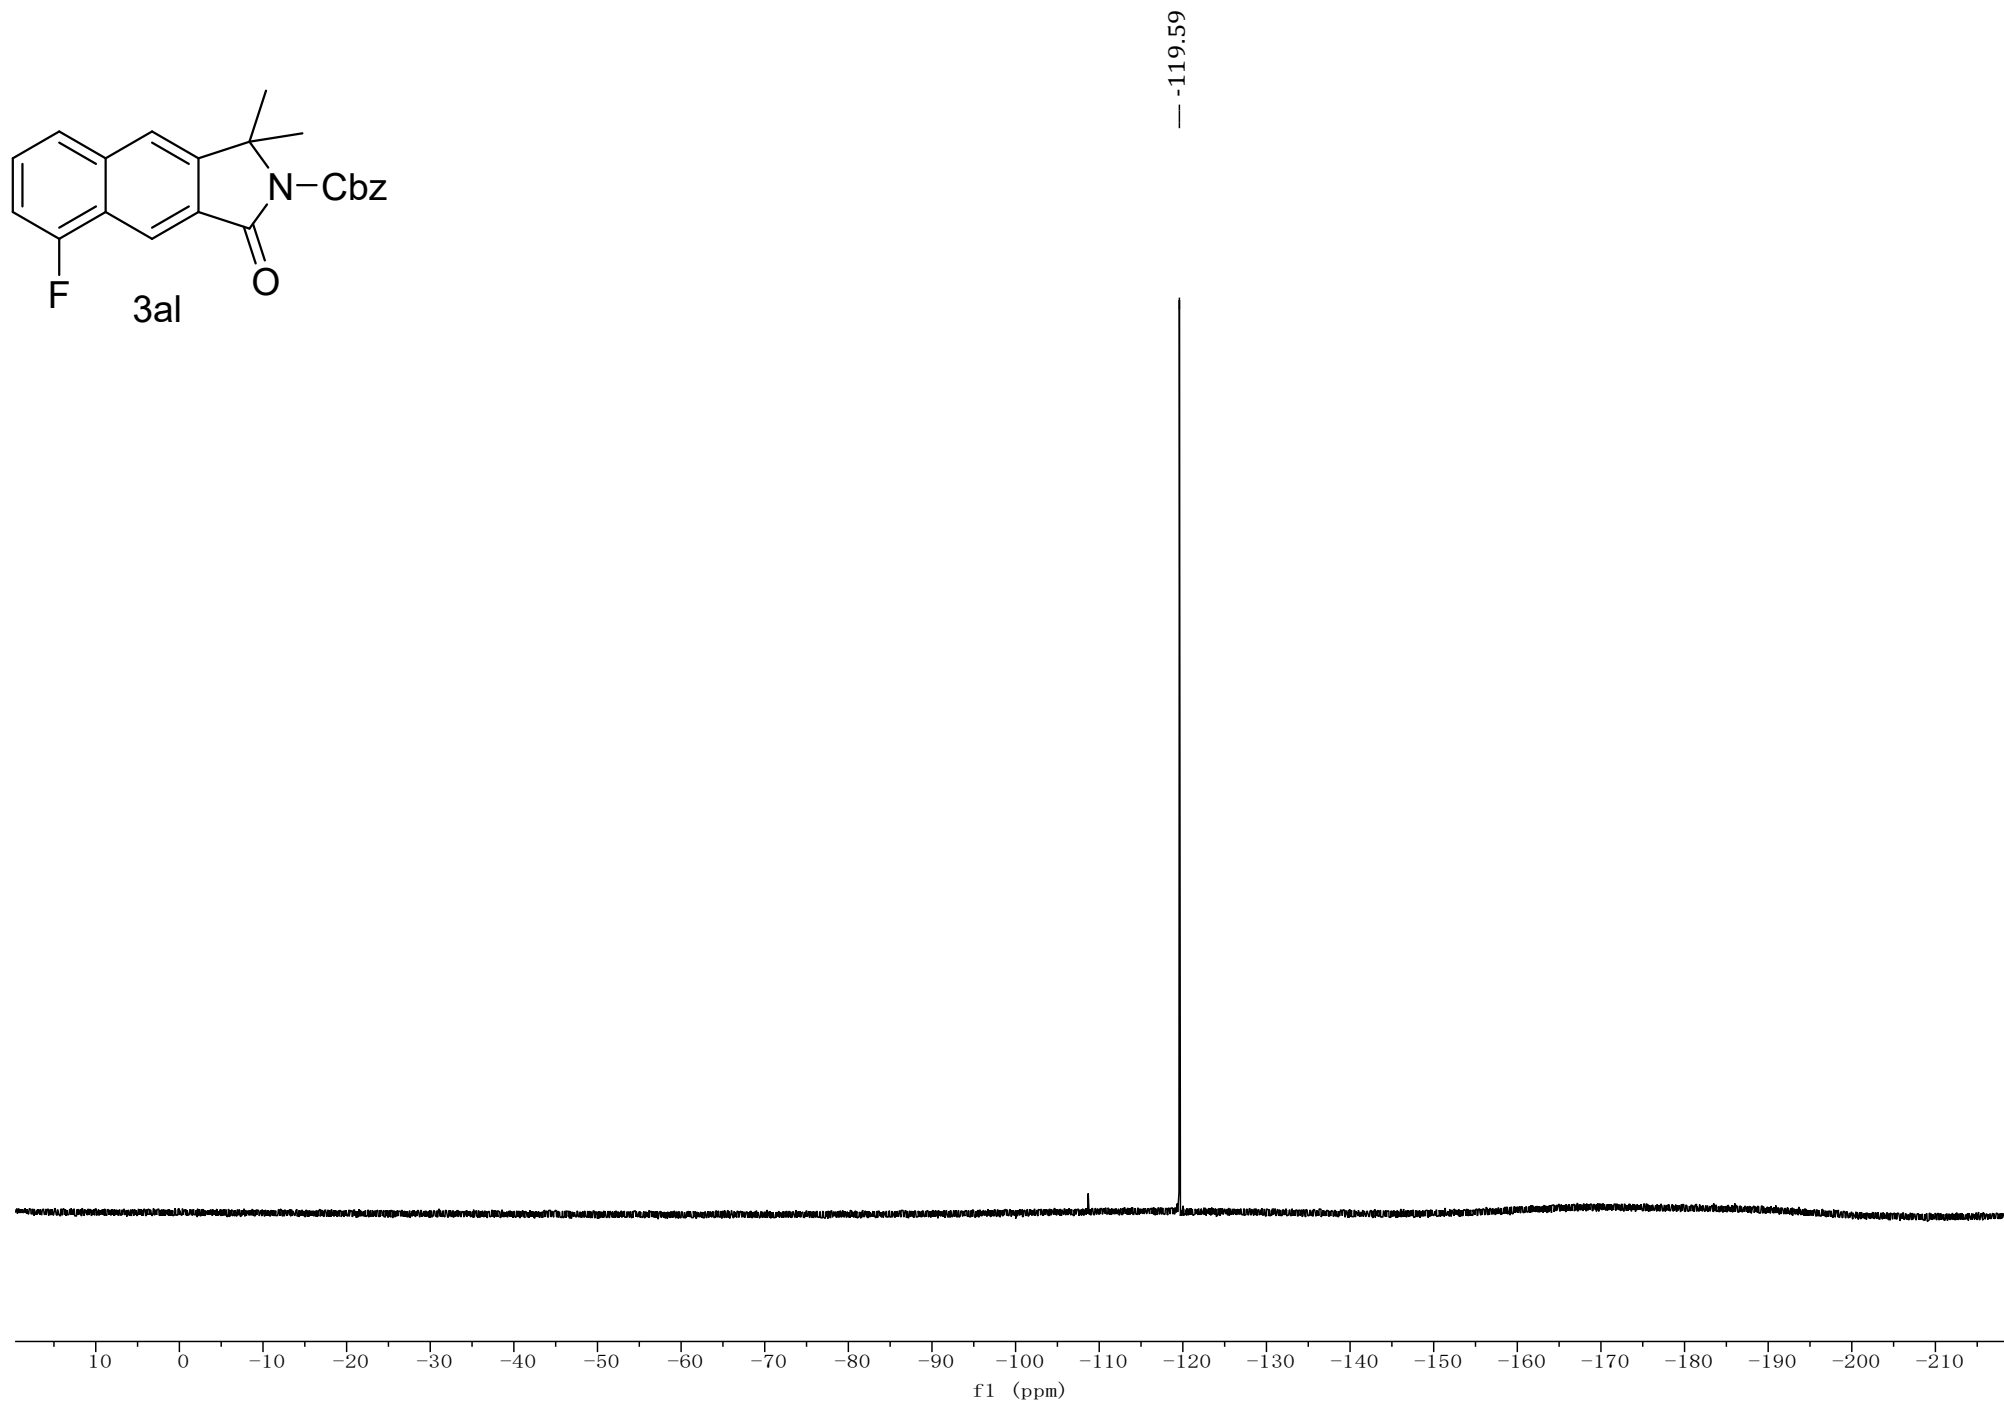

$^{19}\text{F}$  NMR (400 MHz,  $\text{CDCl}_3$ ) spectra of **3al**.

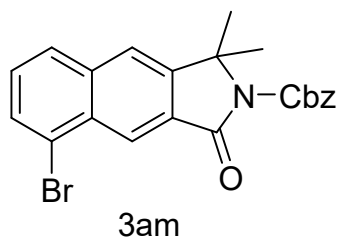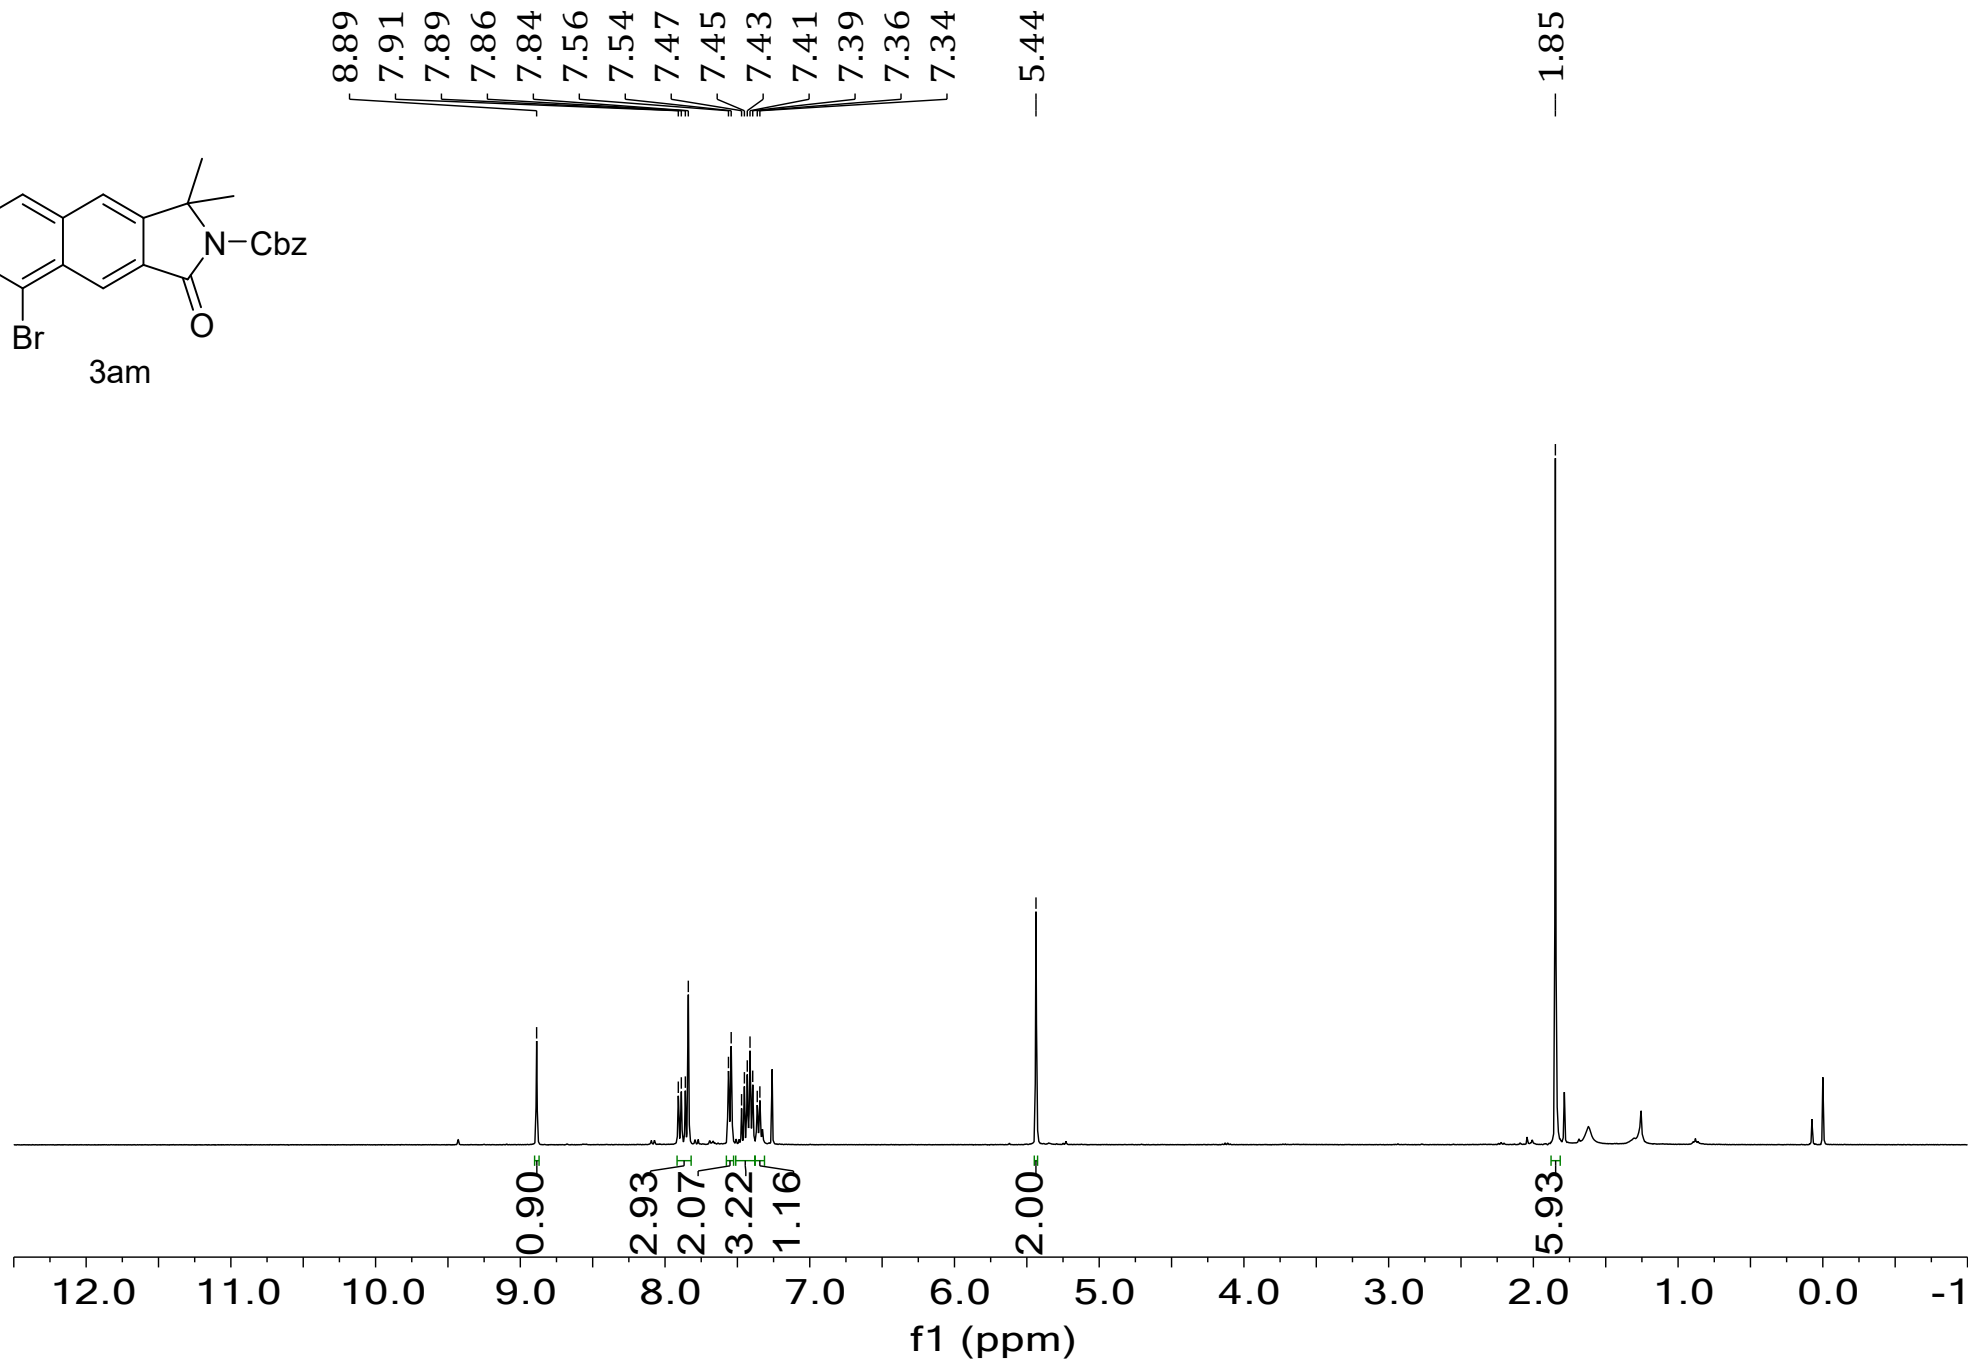

<sup>1</sup>H NMR (400 MHz, CDCl<sub>3</sub>) spectra of **3am**.

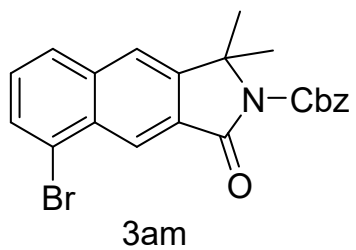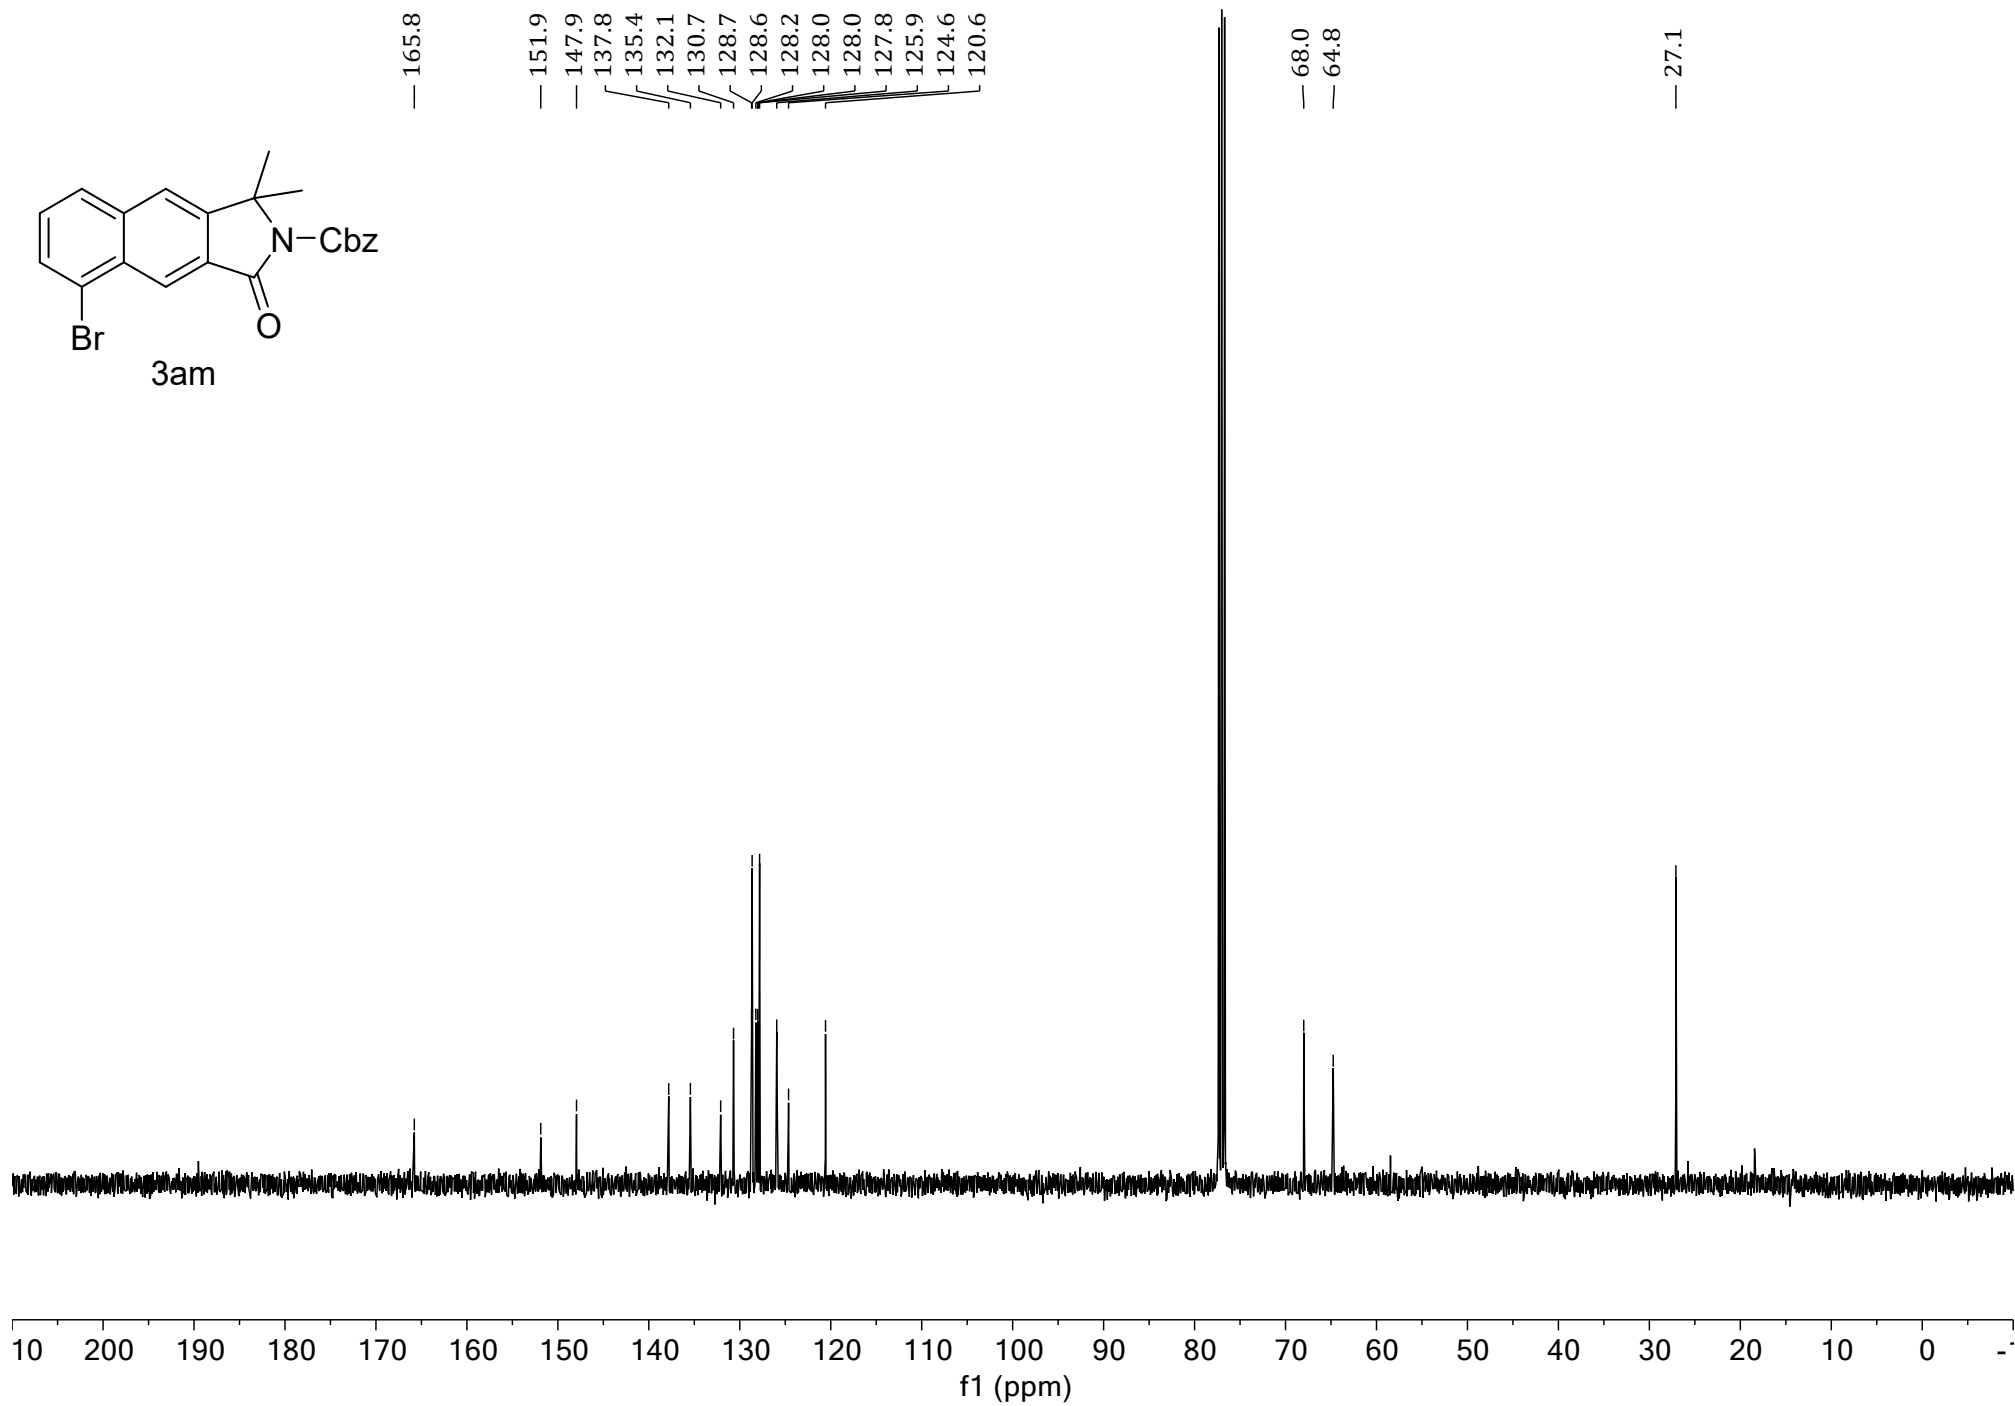

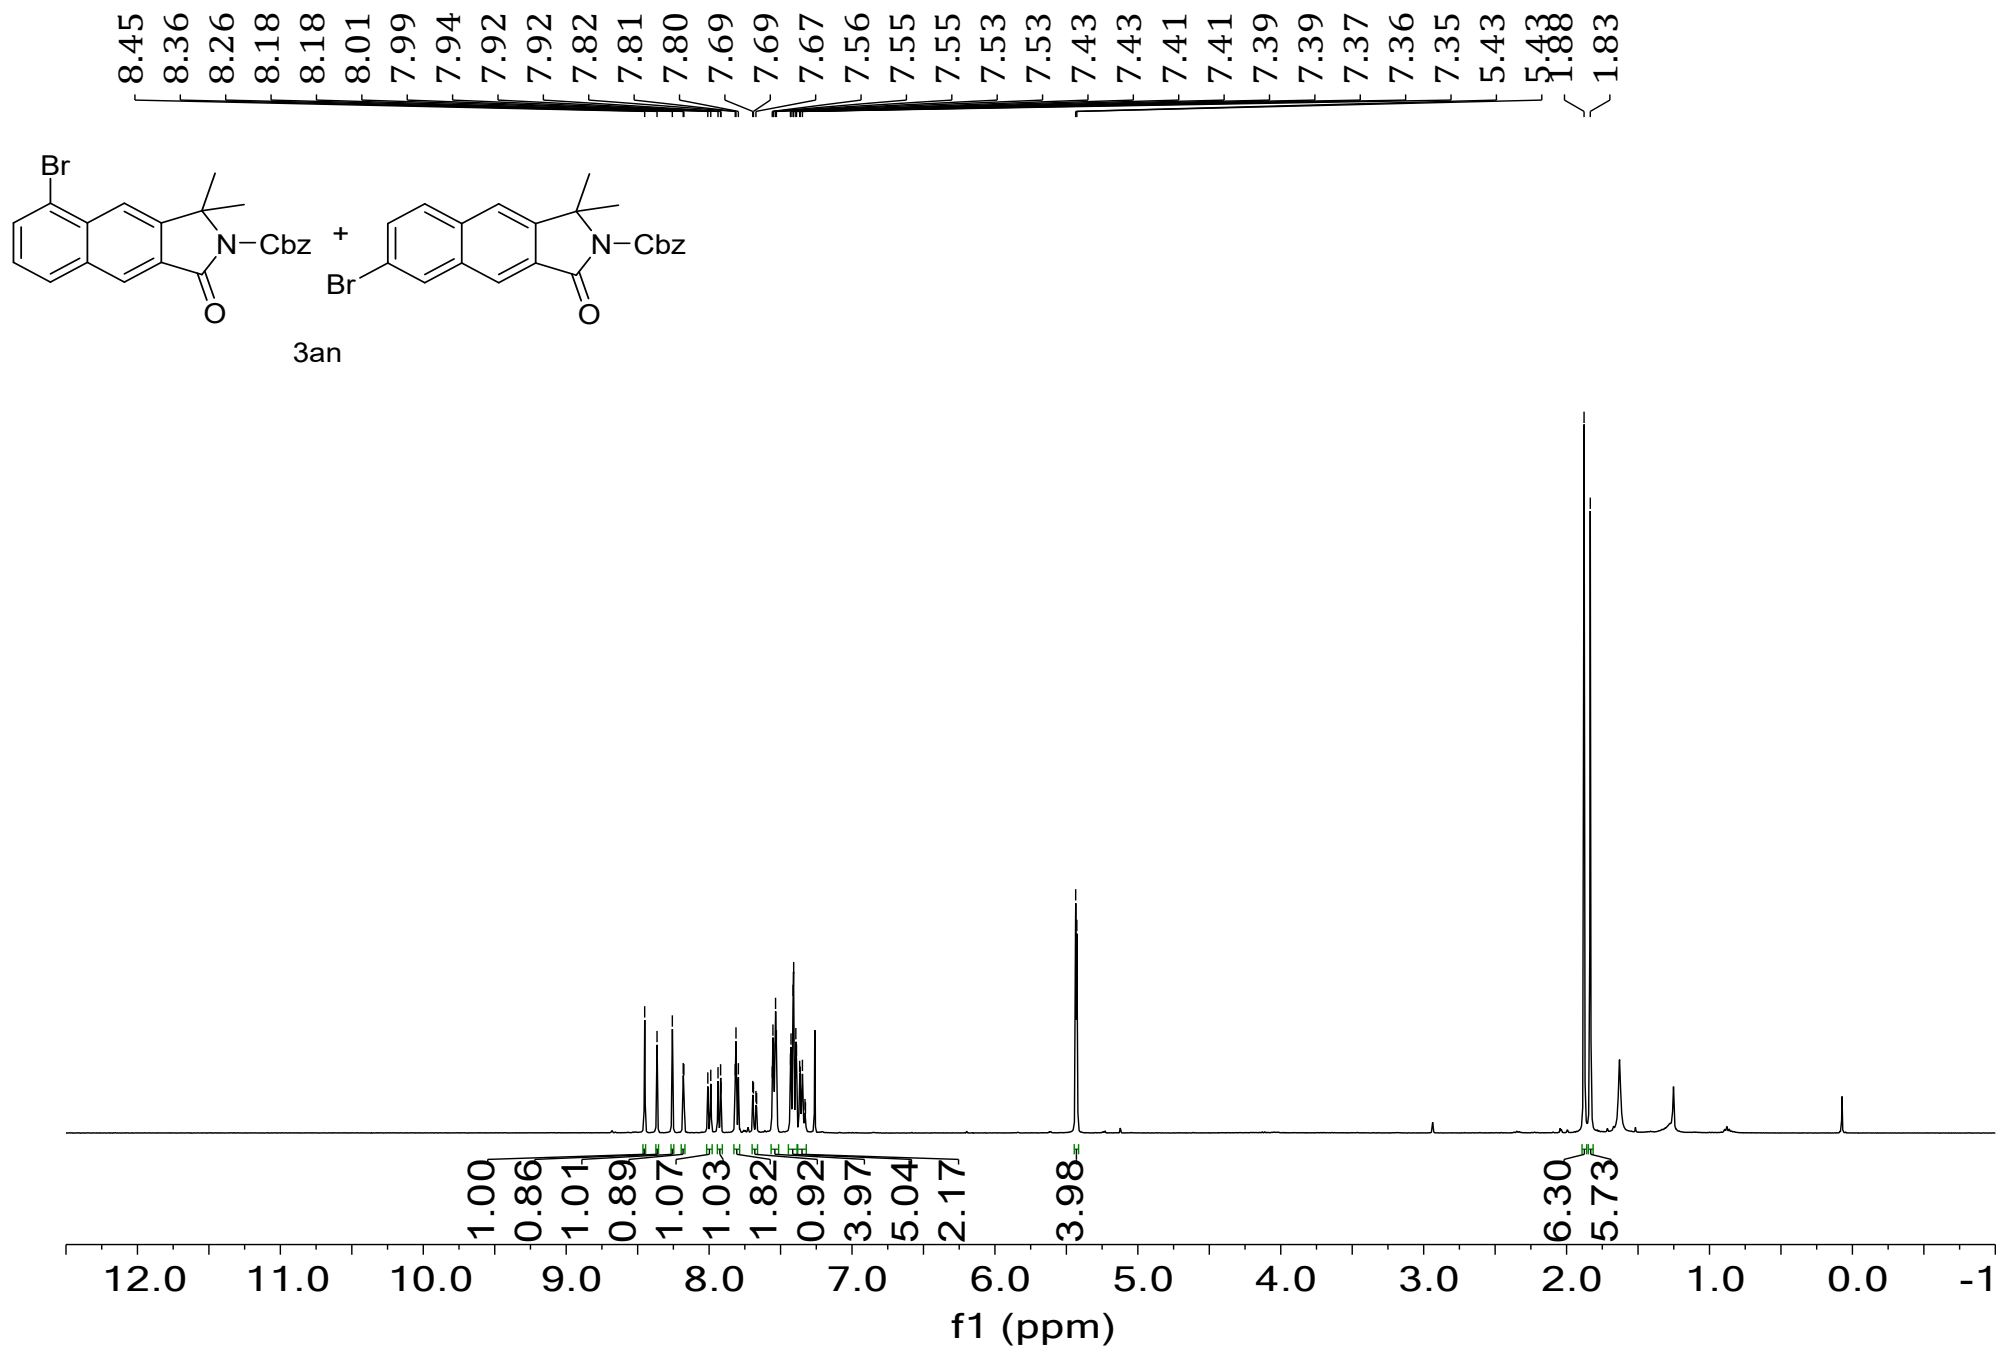

<sup>1</sup>H NMR (400 MHz, CDCl<sub>3</sub>) spectra of 3an.

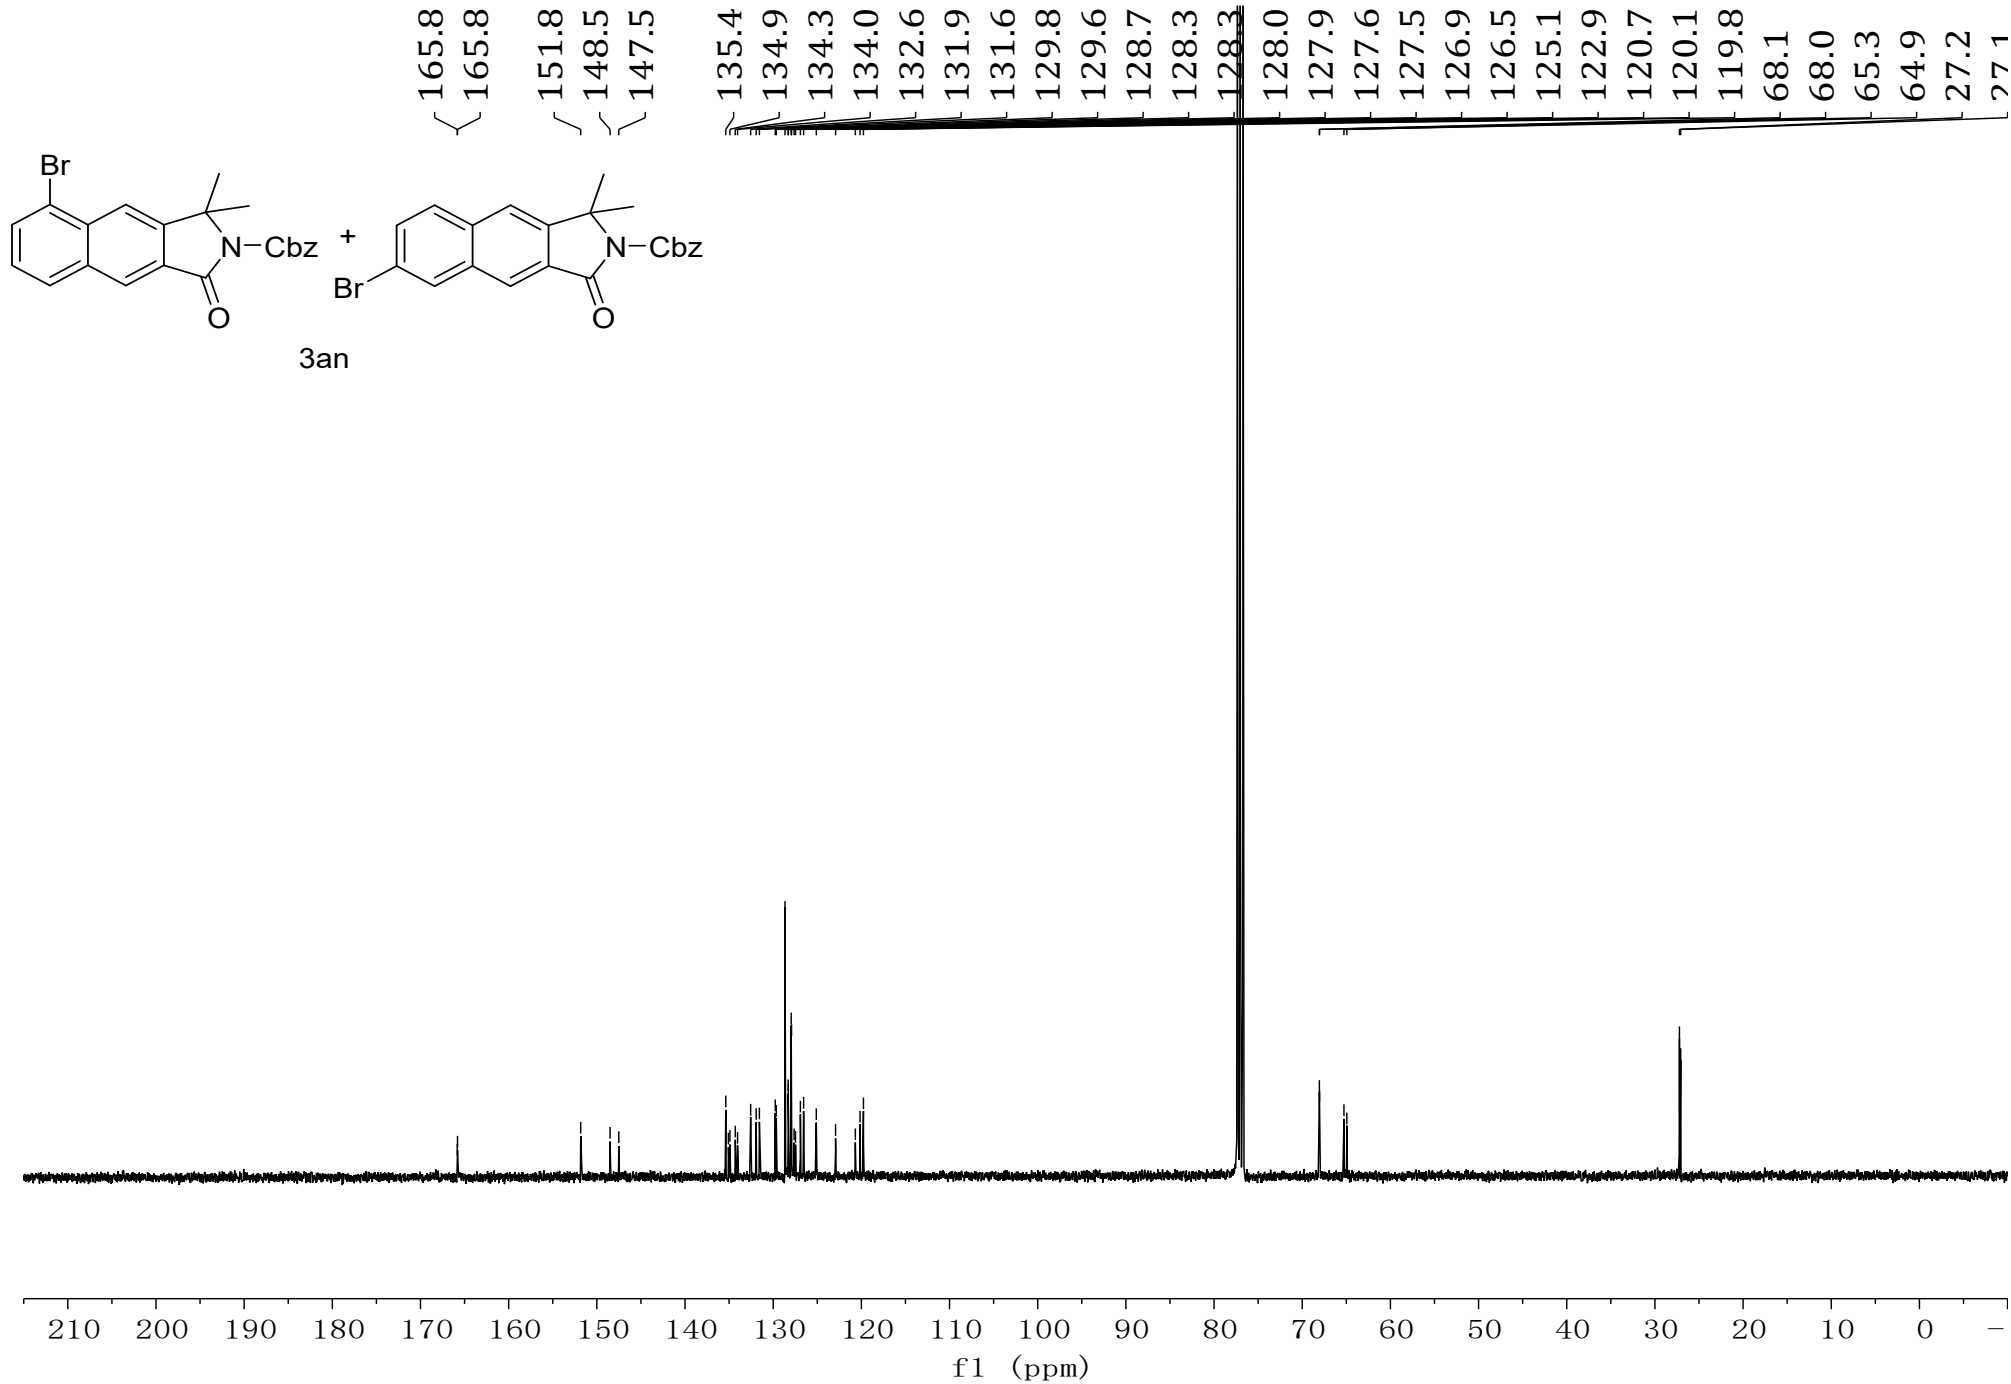

<sup>13</sup>C NMR (100 MHz, CDCl<sub>3</sub>) spectra of **3an**.

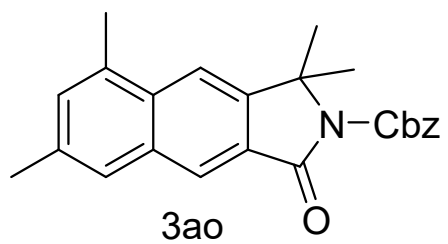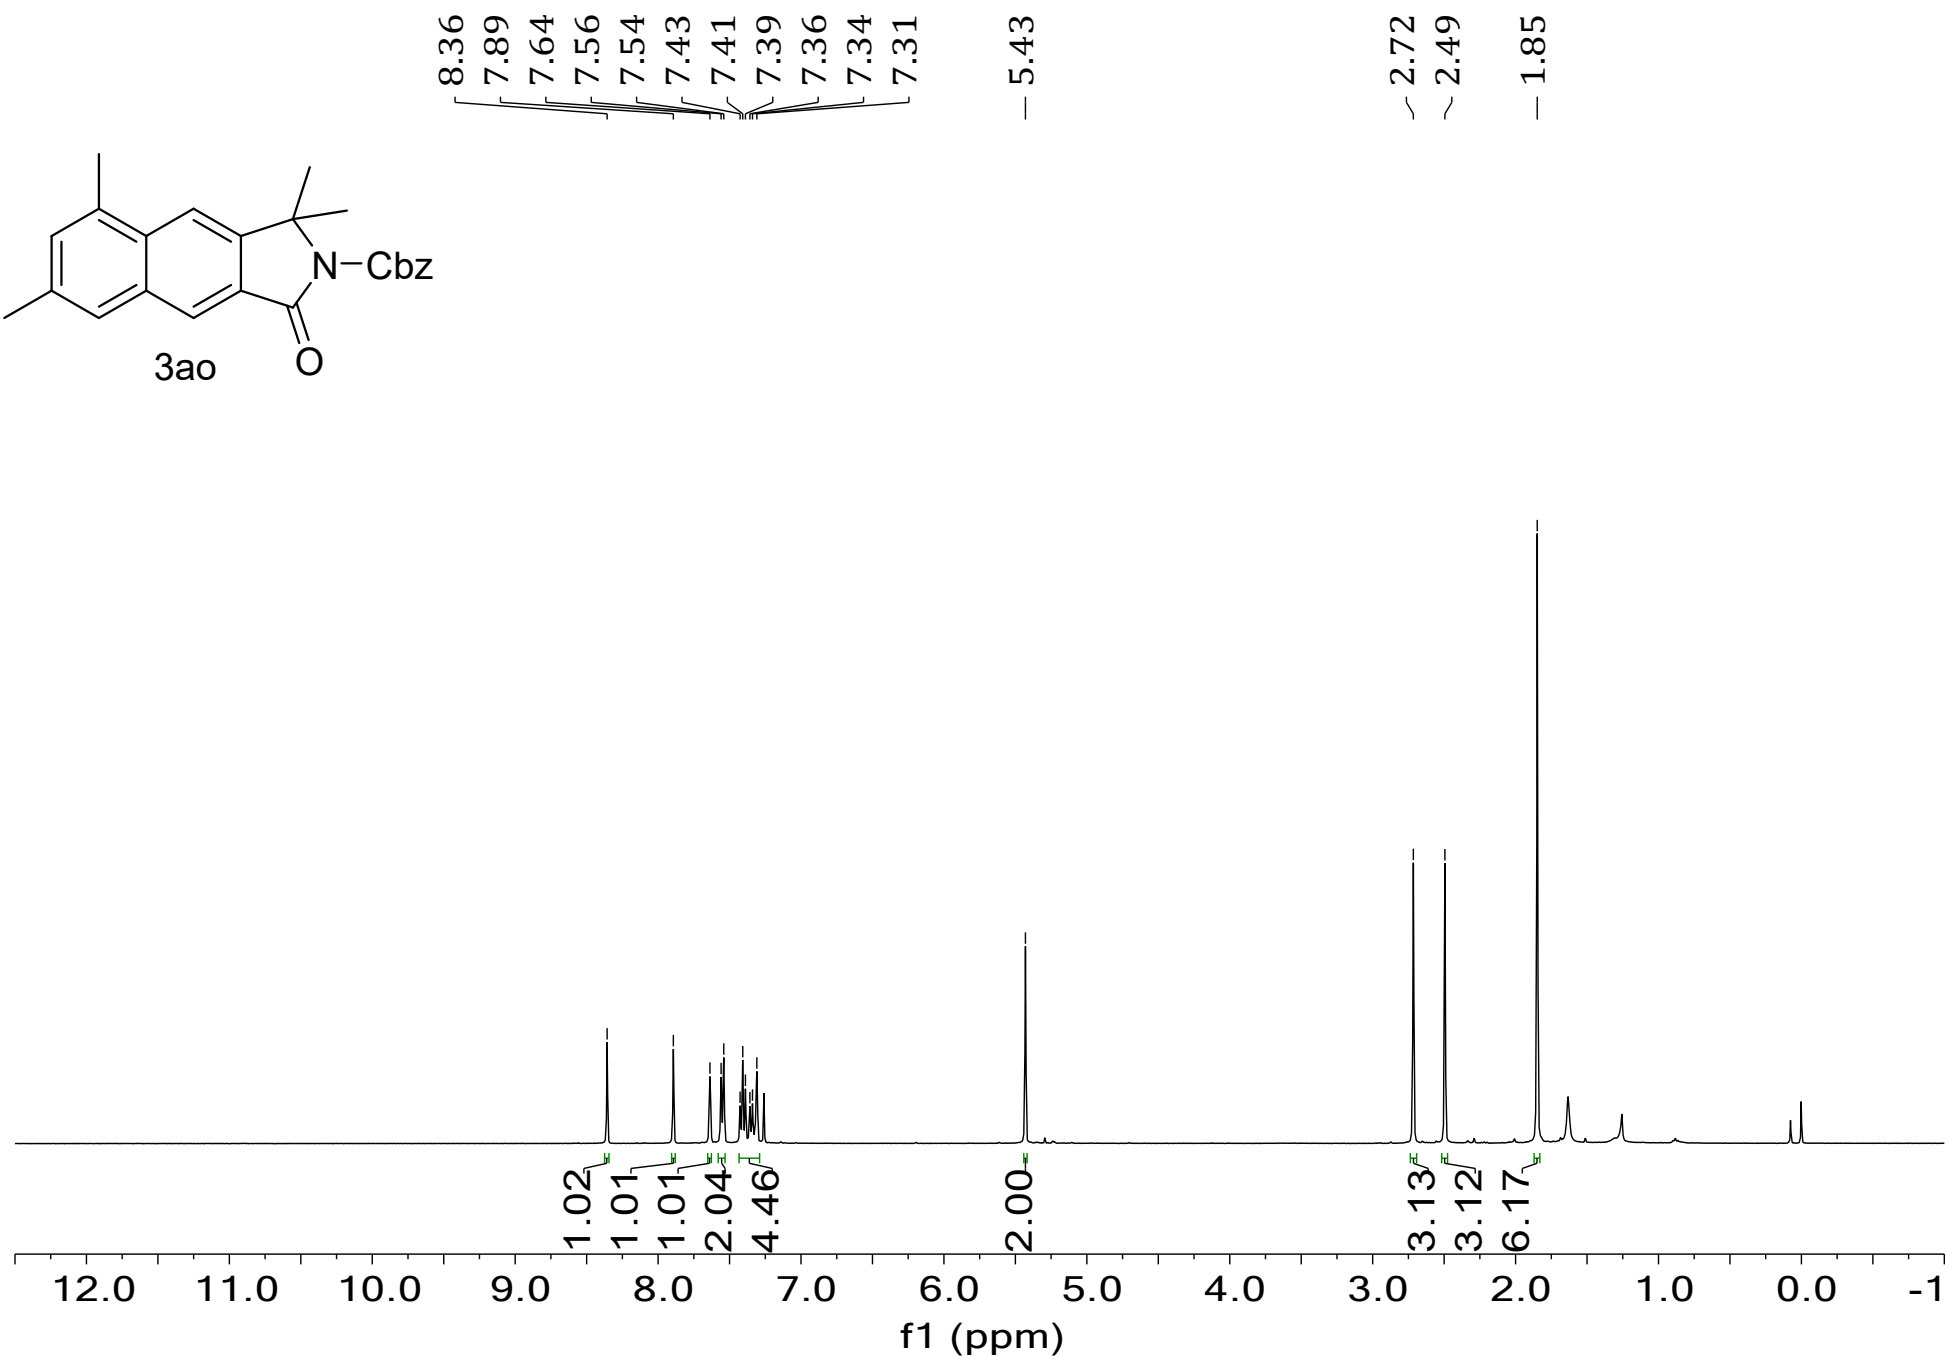

<sup>1</sup>H NMR (400 MHz, CDCl<sub>3</sub>) spectra of **3ao**.

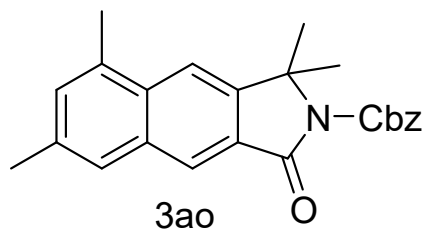

— 166.5  
— 152.0  
— 146.3  
— 136.0  
— 135.6  
— 134.3  
— 134.1  
— 133.6  
— 131.8  
— 128.6  
— 128.2  
— 127.9  
— 126.9  
— 126.2  
— 125.8  
— 115.9

— 67.9  
— 65.0

— 27.3  
— 21.5  
— 19.6

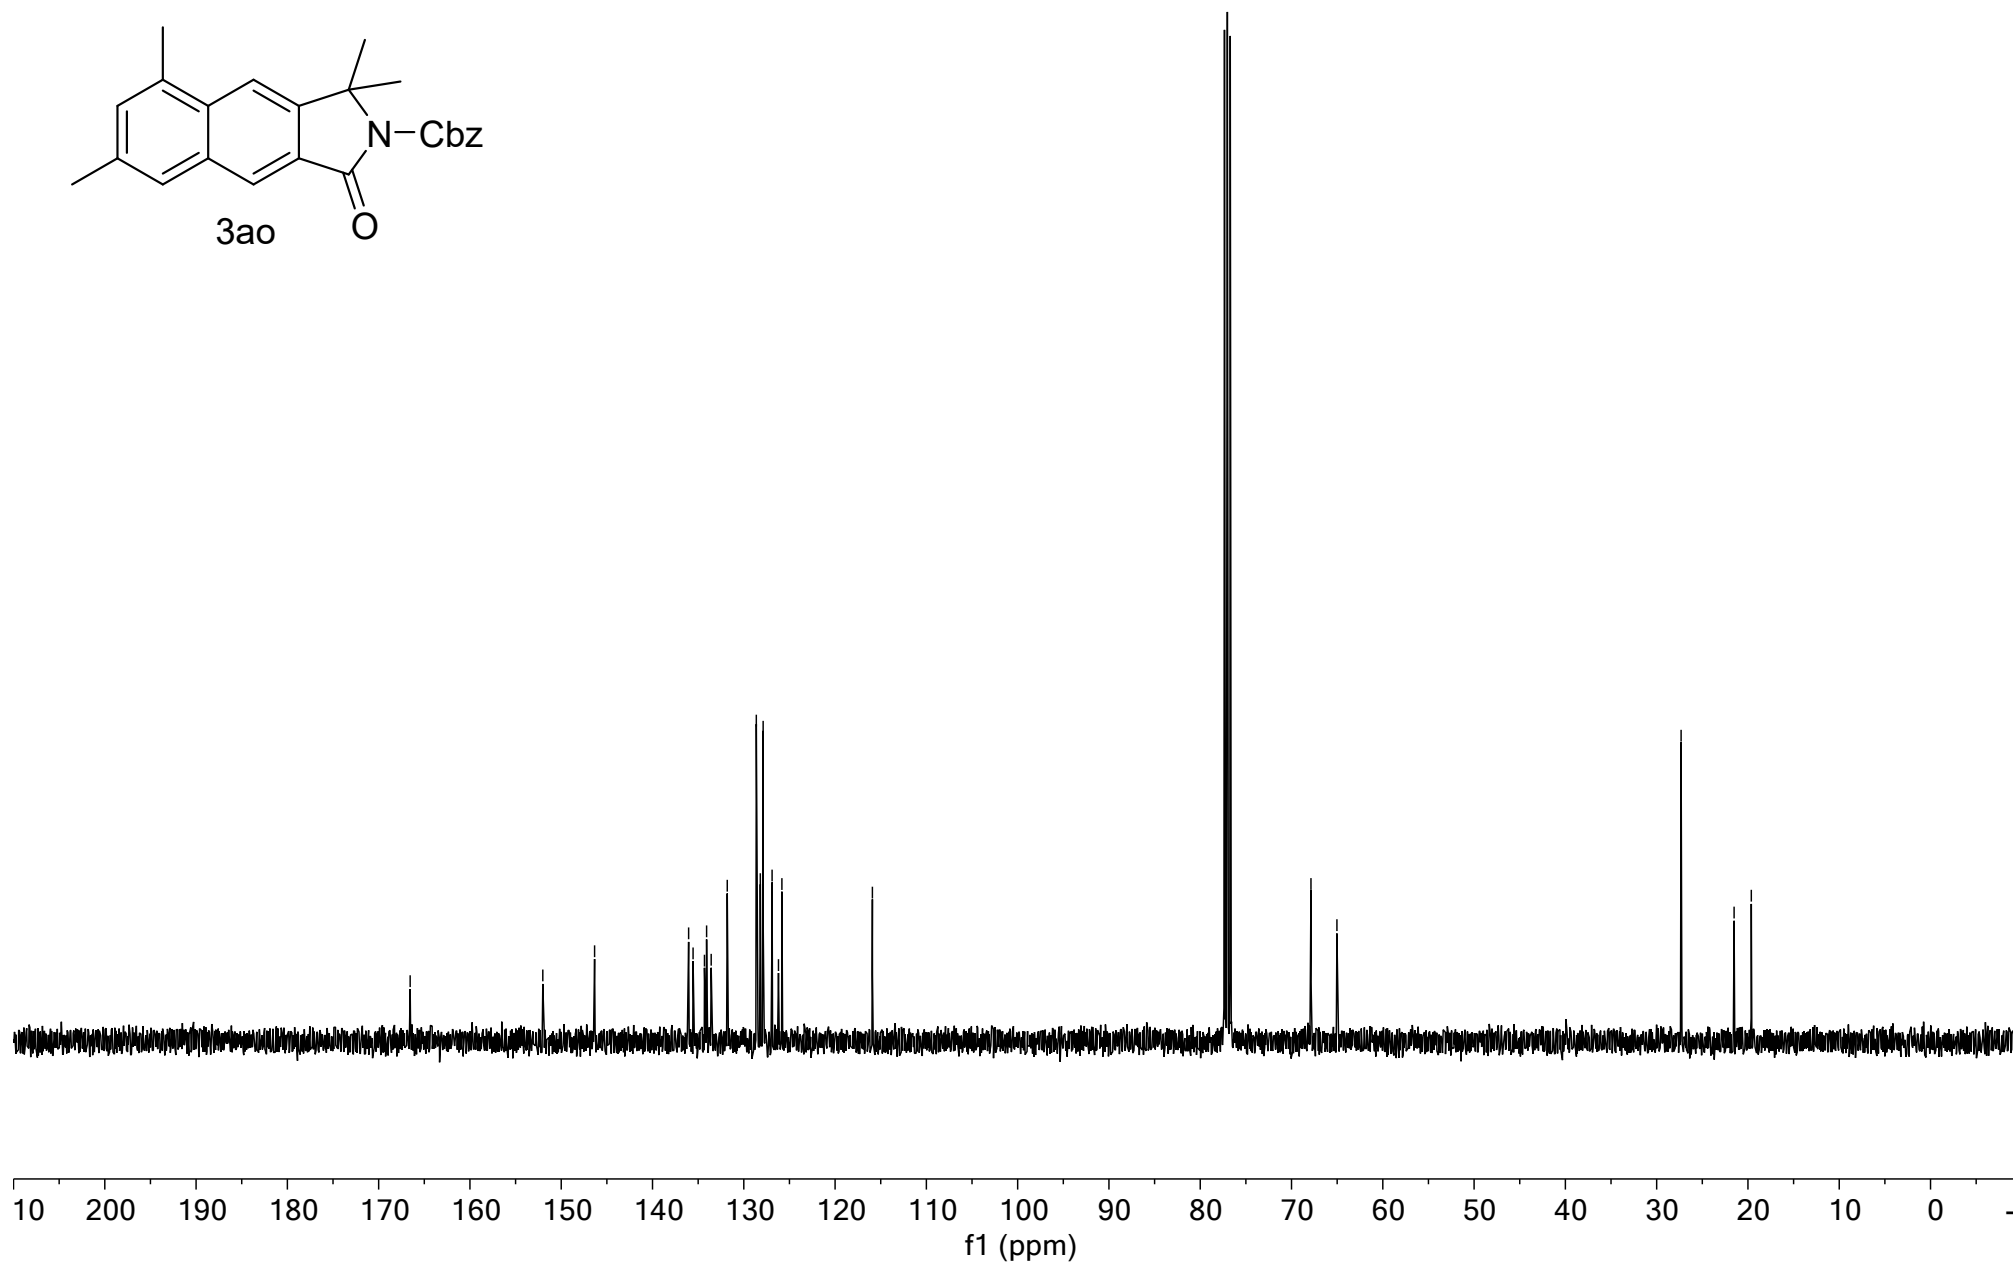

<sup>13</sup>C NMR (100 MHz, CDCl<sub>3</sub>) spectra of 3ao.

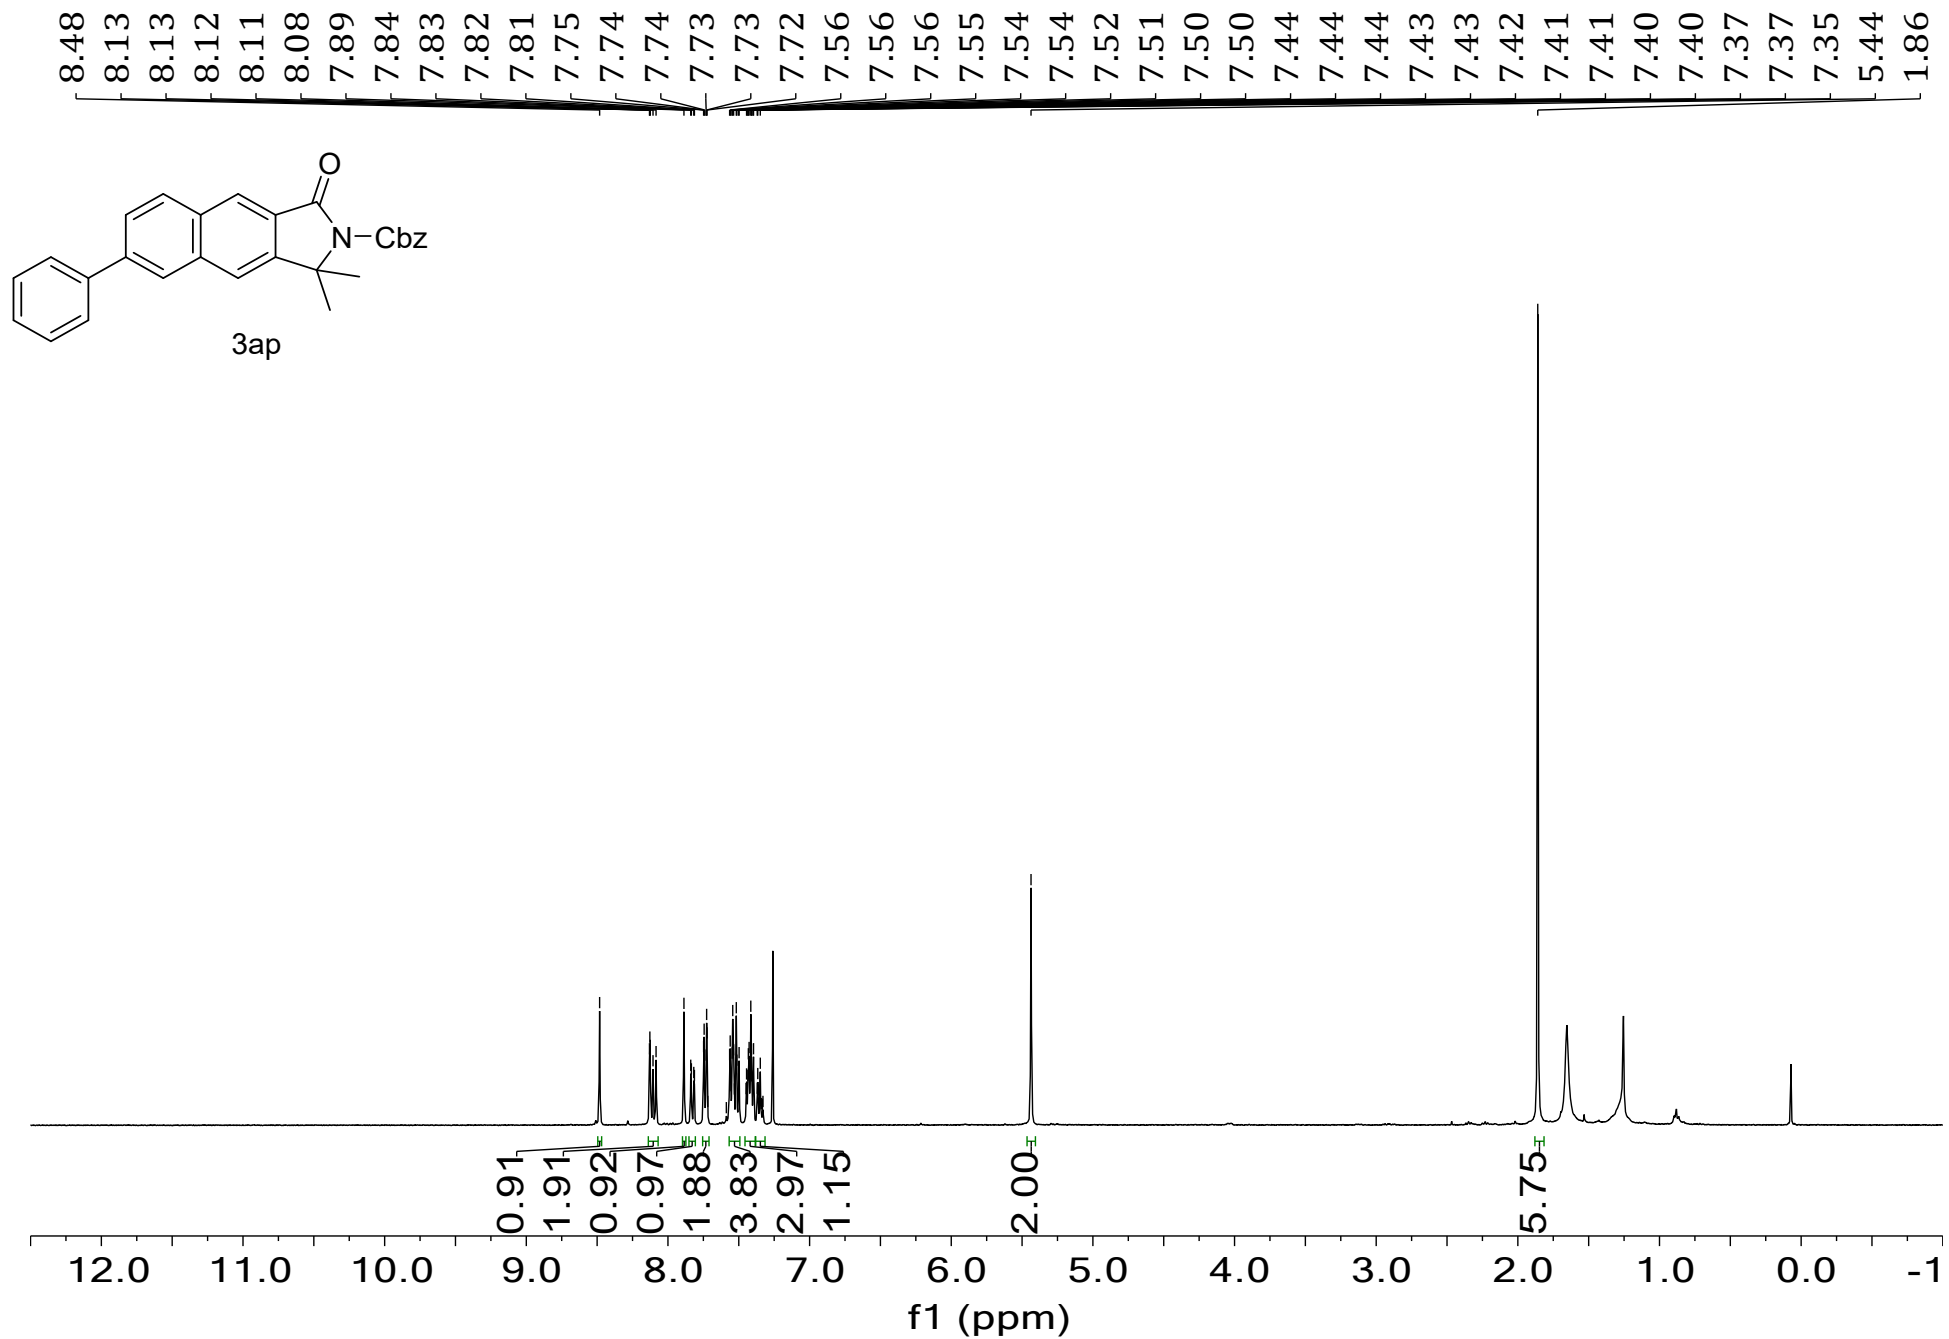

<sup>1</sup>H NMR (400 MHz, CDCl<sub>3</sub>) spectra of **3ap**.



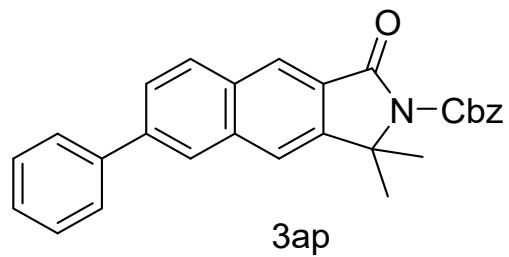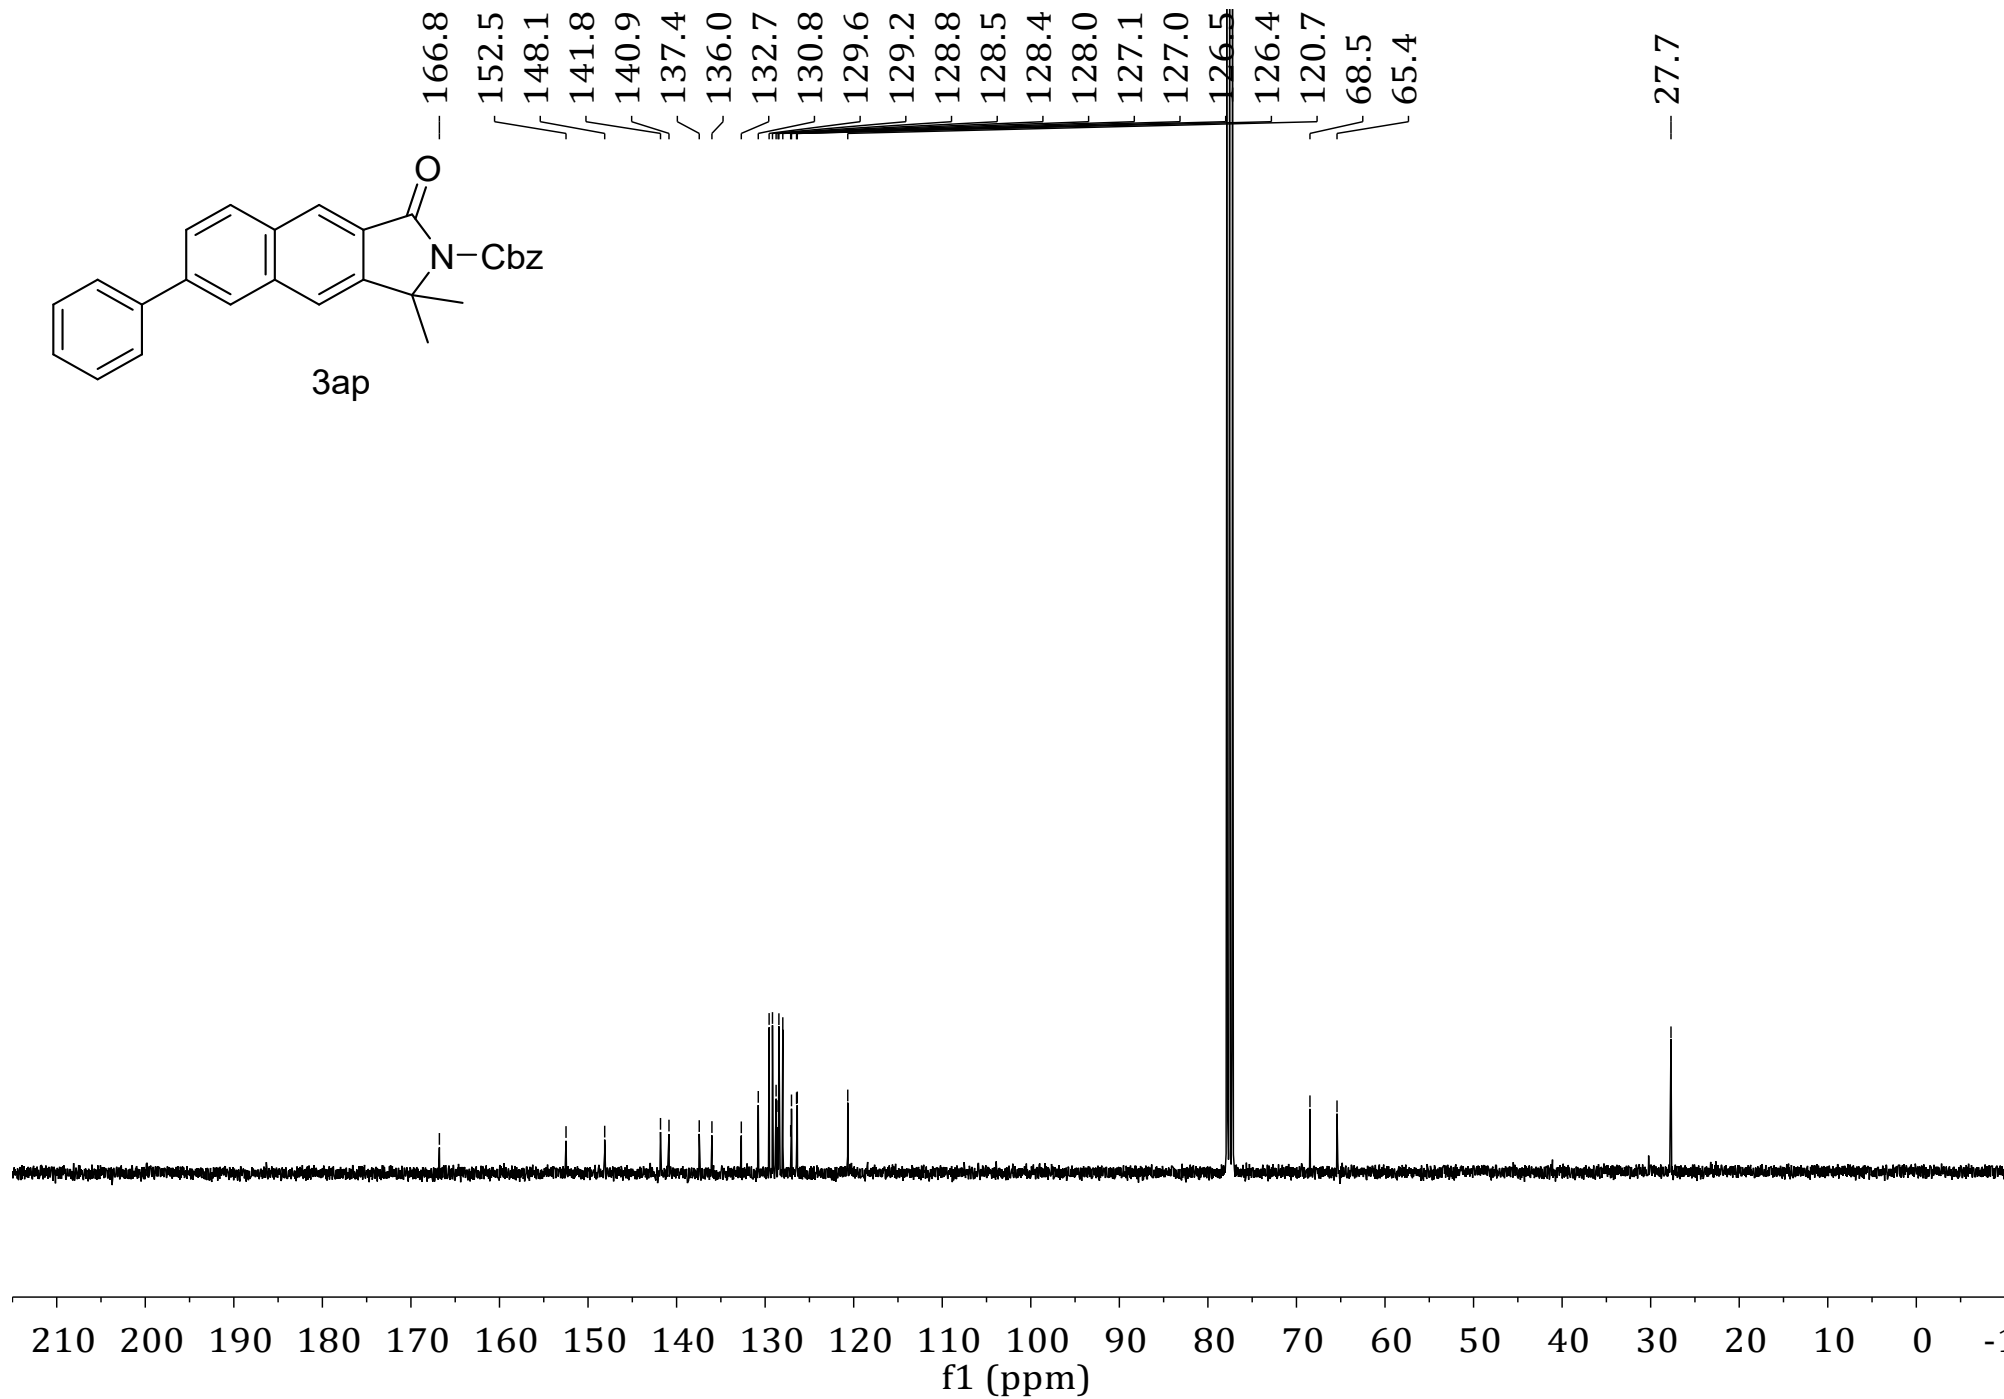

<sup>13</sup>C NMR (100 MHz, CDCl<sub>3</sub>) spectra of **3ap**.

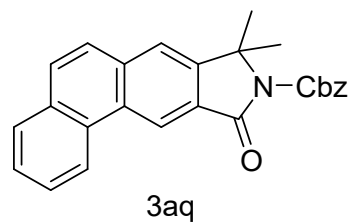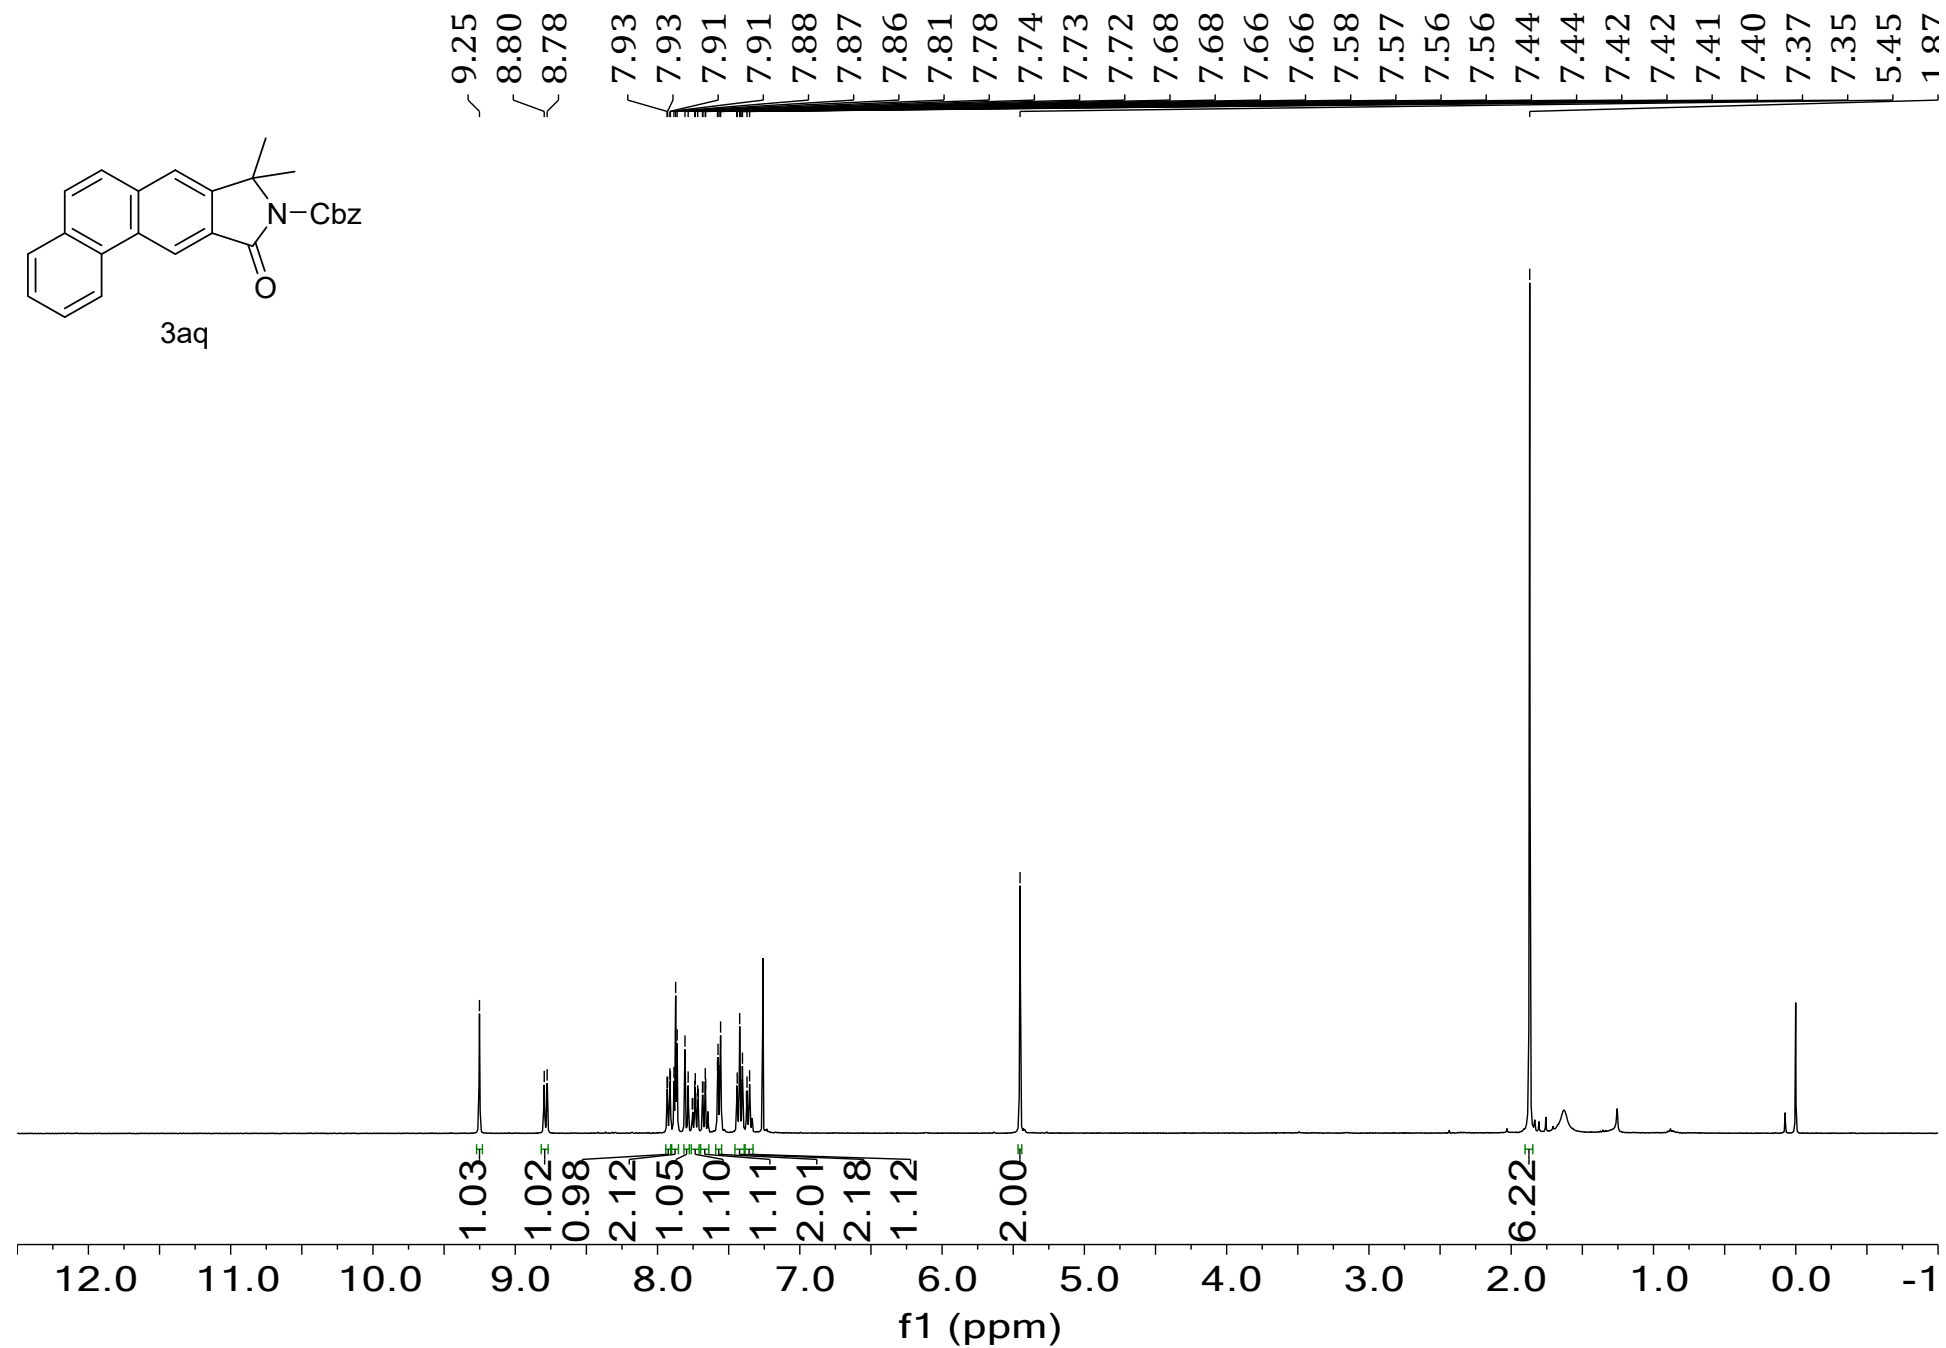

<sup>1</sup>H NMR (400 MHz, CDCl<sub>3</sub>) spectra of **3aq**.

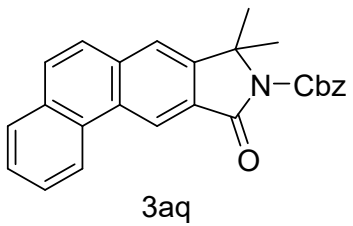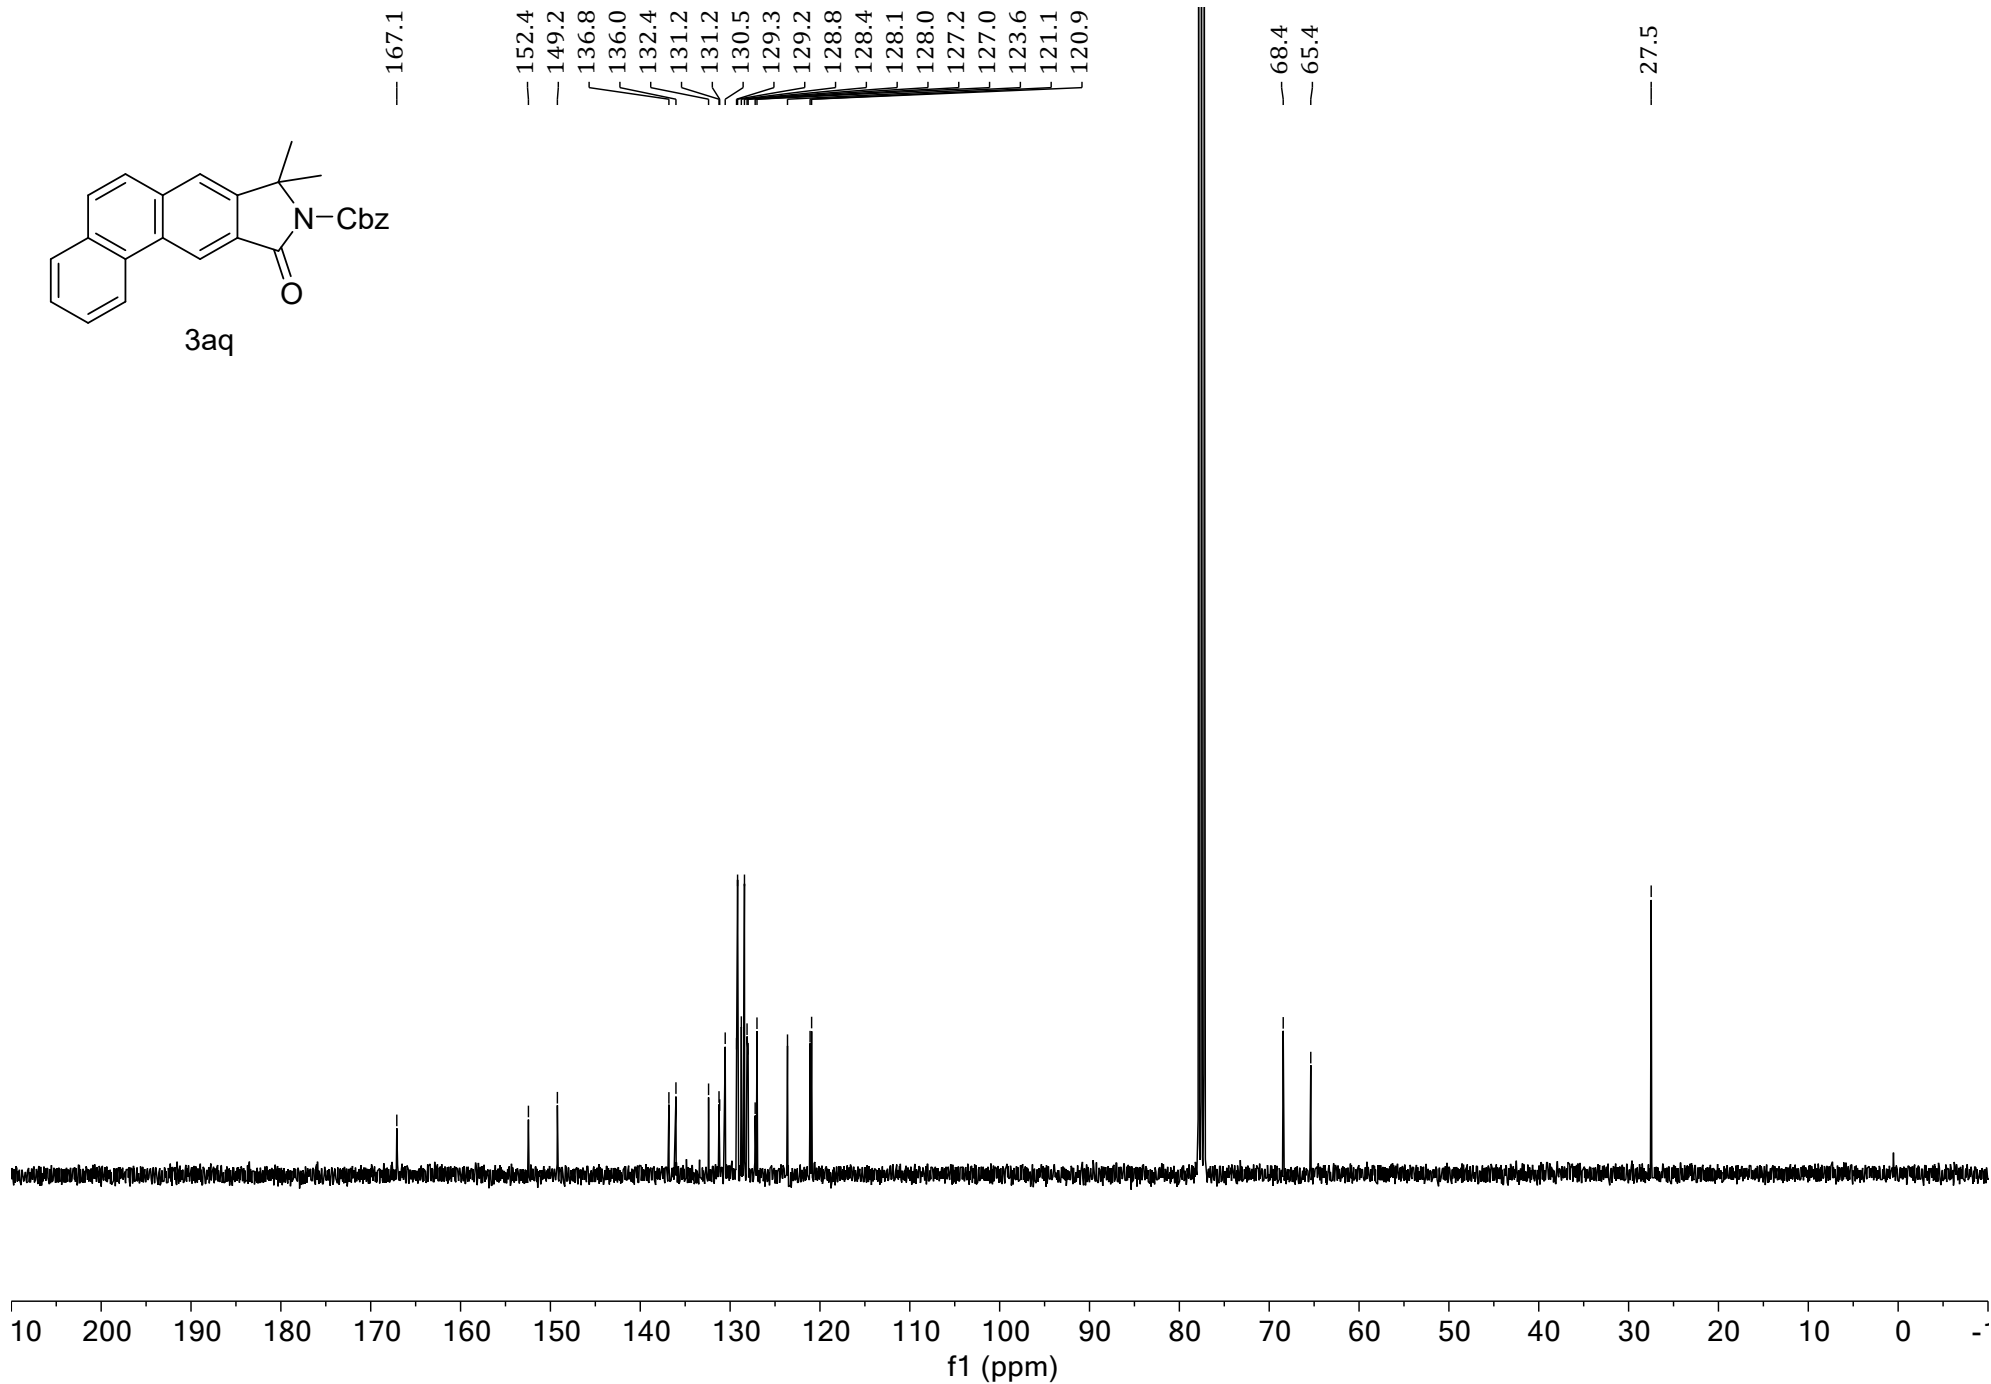

$^{13}\text{C}$  NMR (100 MHz,  $\text{CDCl}_3$ ) spectra of **3aq**.

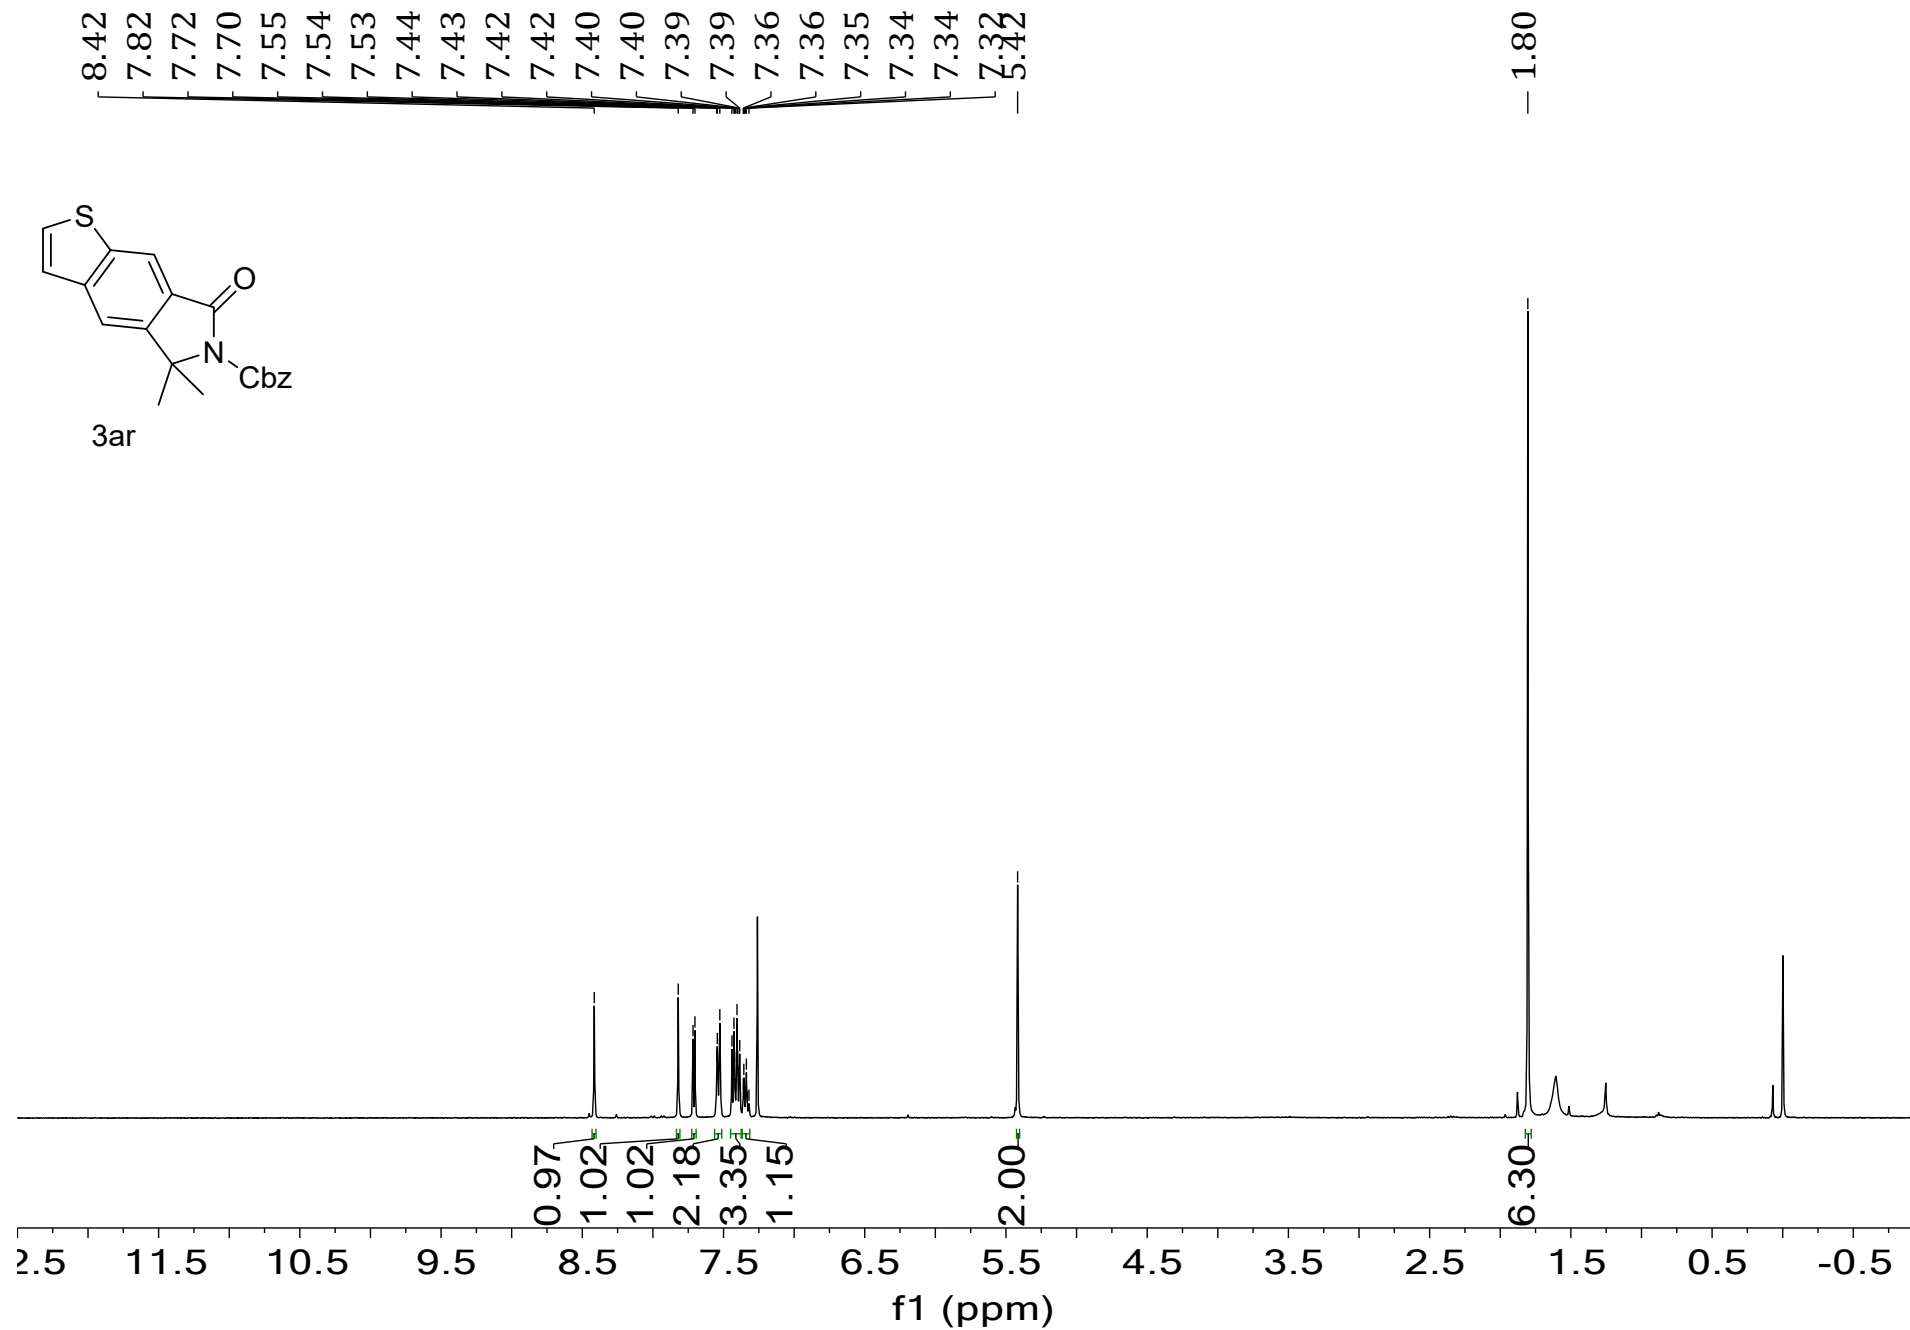

<sup>1</sup>H NMR (400 MHz, CDCl<sub>3</sub>) spectra of **3ar**.

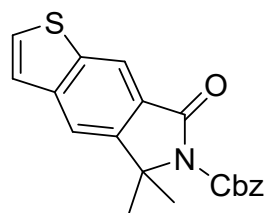

3ar

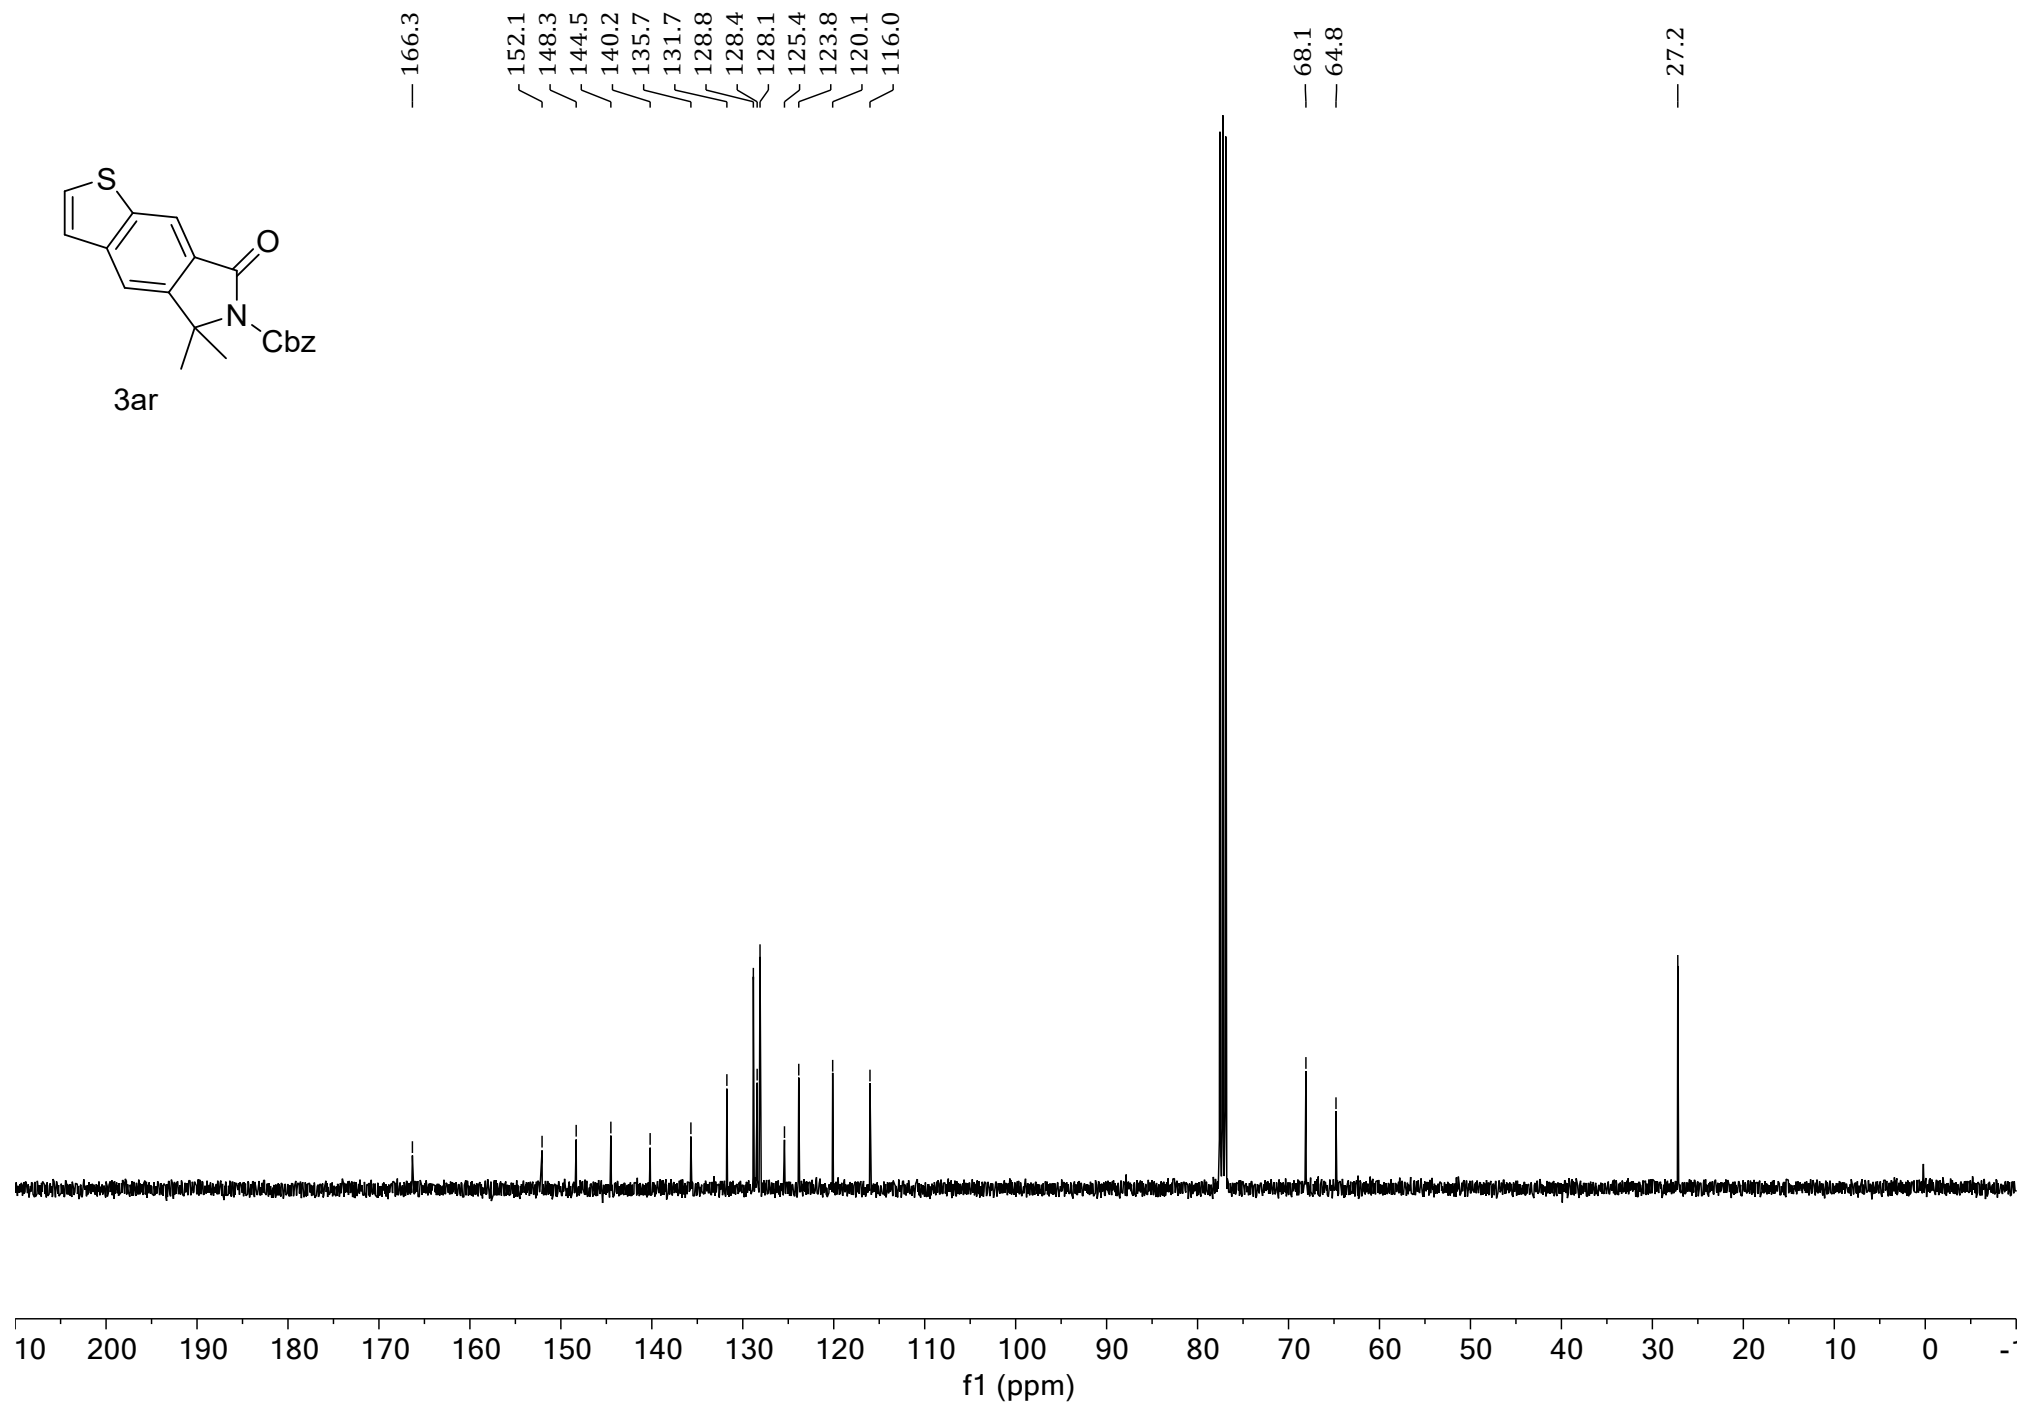

<sup>13</sup>C NMR (100 MHz, CDCl<sub>3</sub>) spectra of **3ar**.

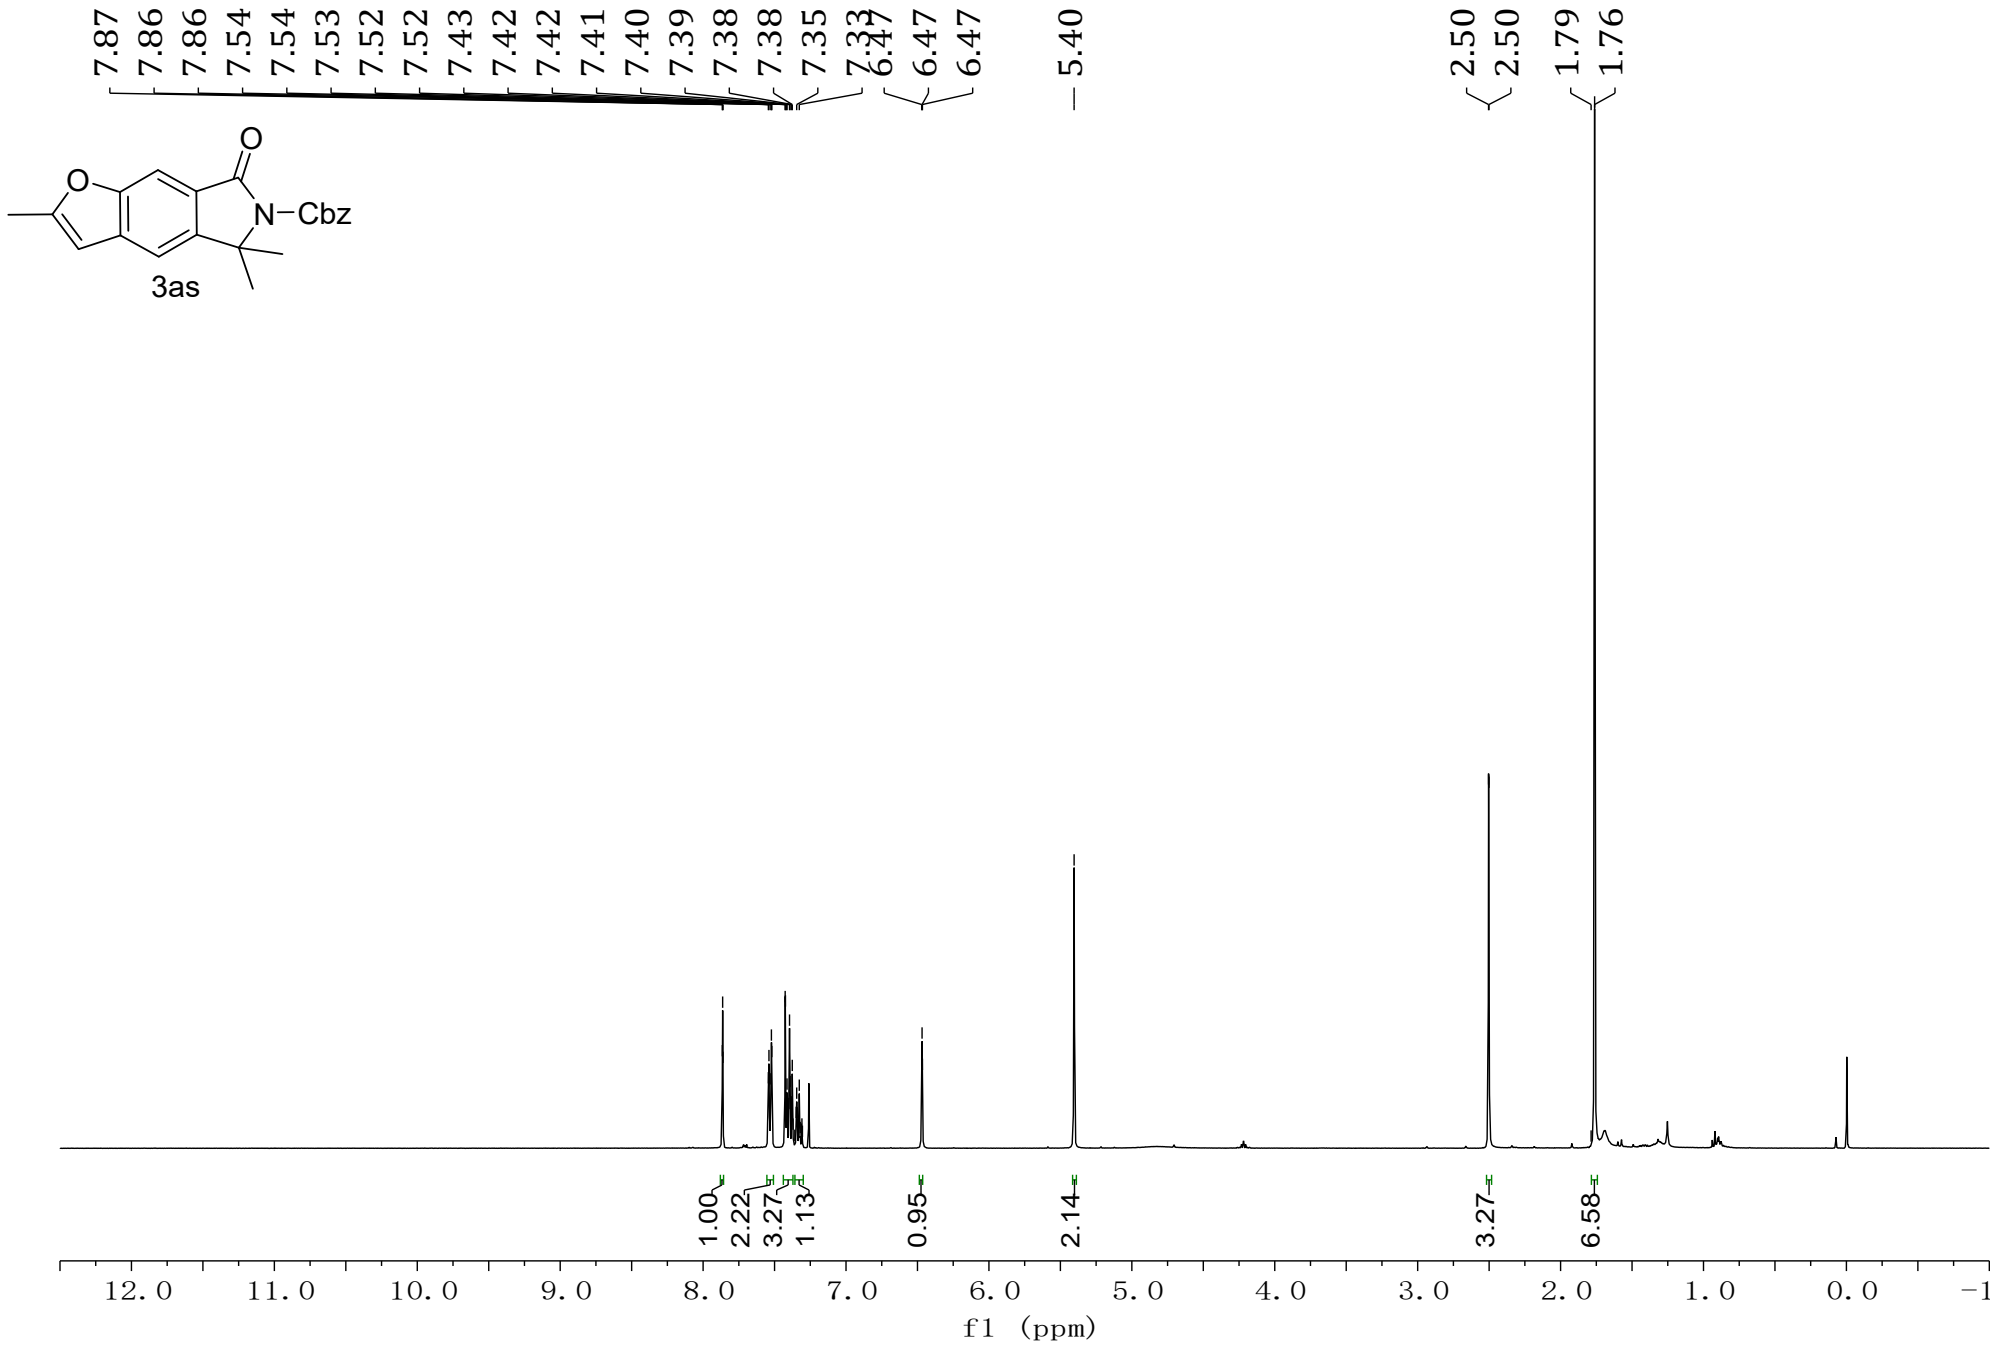

$^1\text{H NMR}$  (400 MHz,  $\text{CDCl}_3$ ) spectra of **3as**.

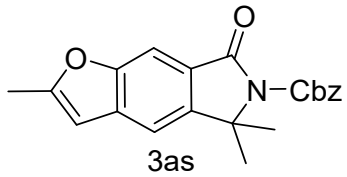

166.9  
160.4  
154.7  
152.0  
147.4  
136.0  
135.8  
128.8  
128.3  
128.0  
124.1  
112.1  
107.0  
103.4

67.9  
64.6

27.2

14.6

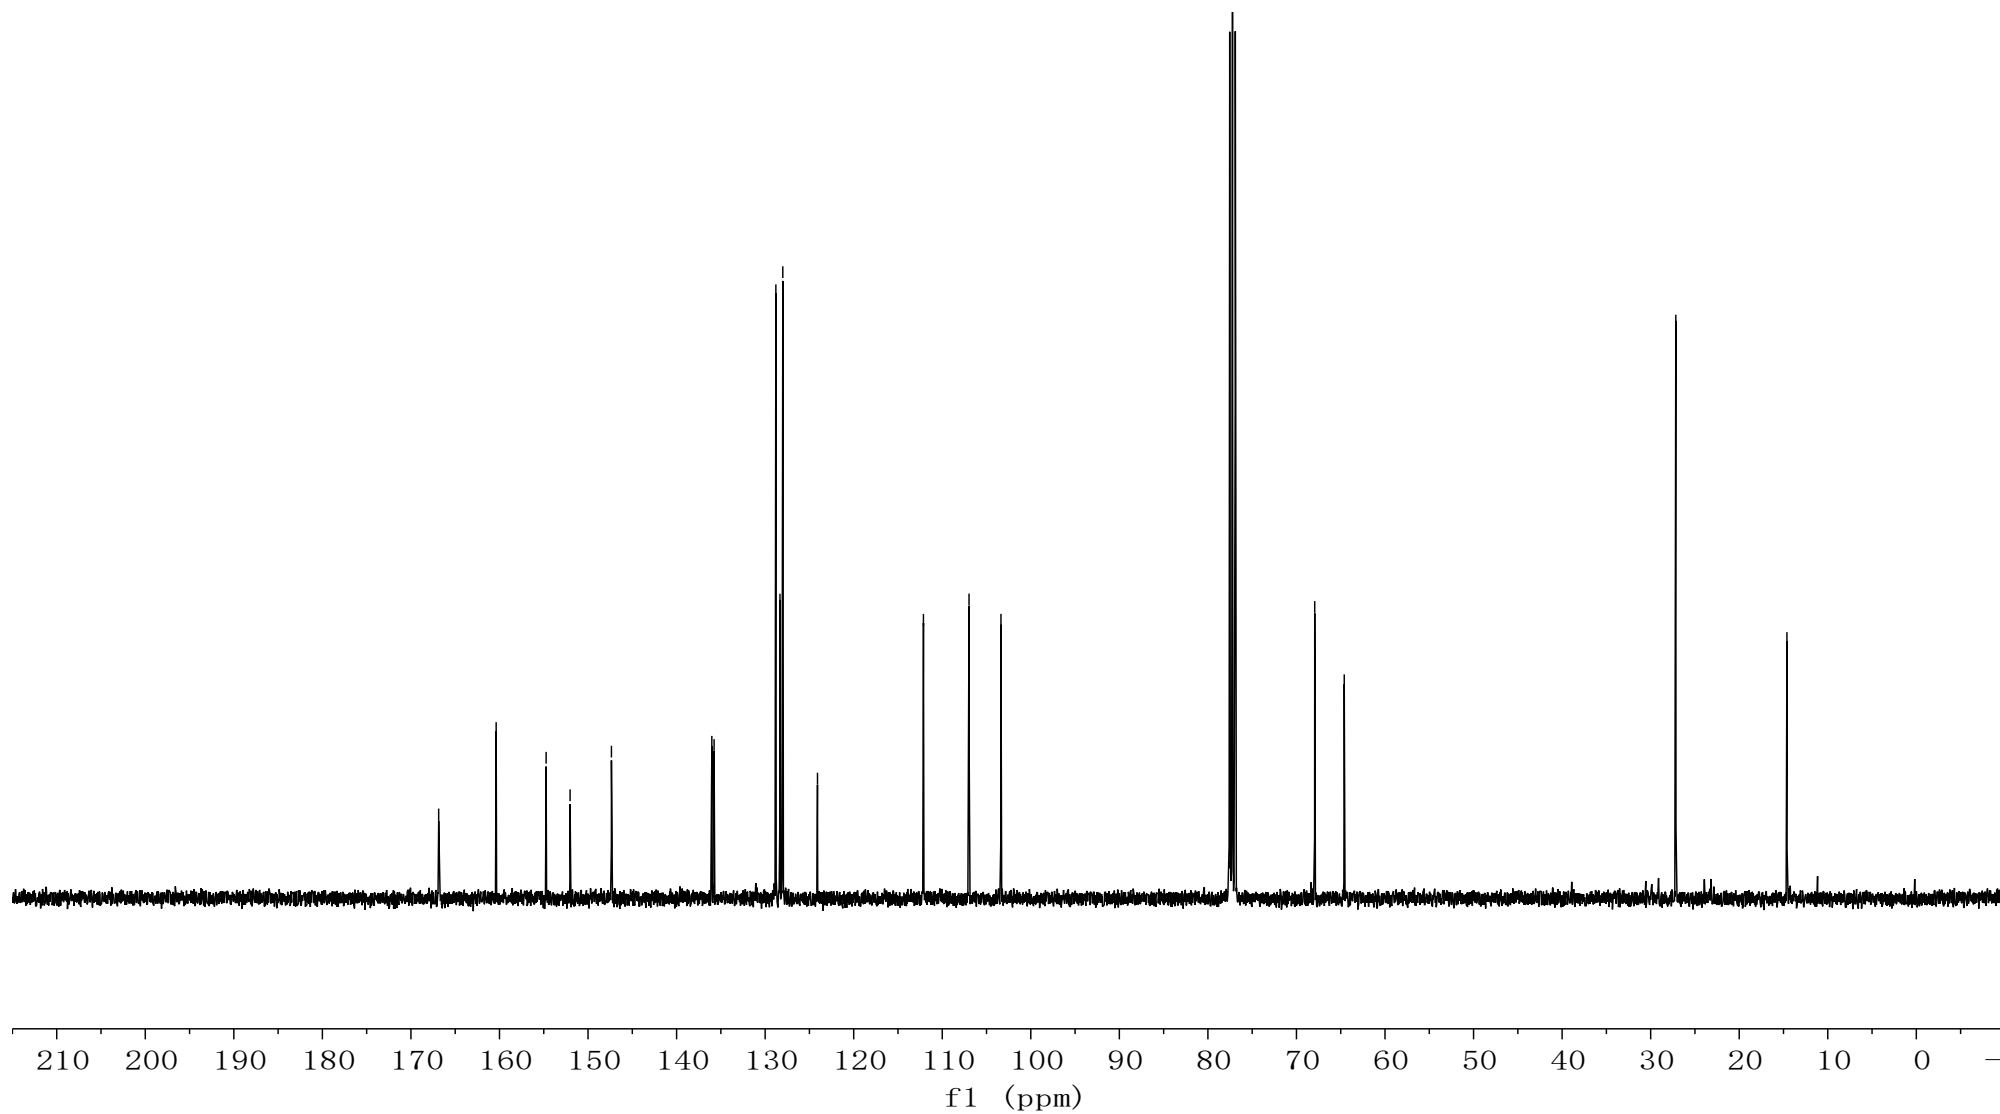

<sup>13</sup>C NMR (100 MHz, CDCl<sub>3</sub>) spectra of **3as**.

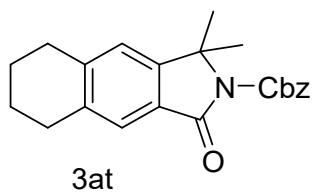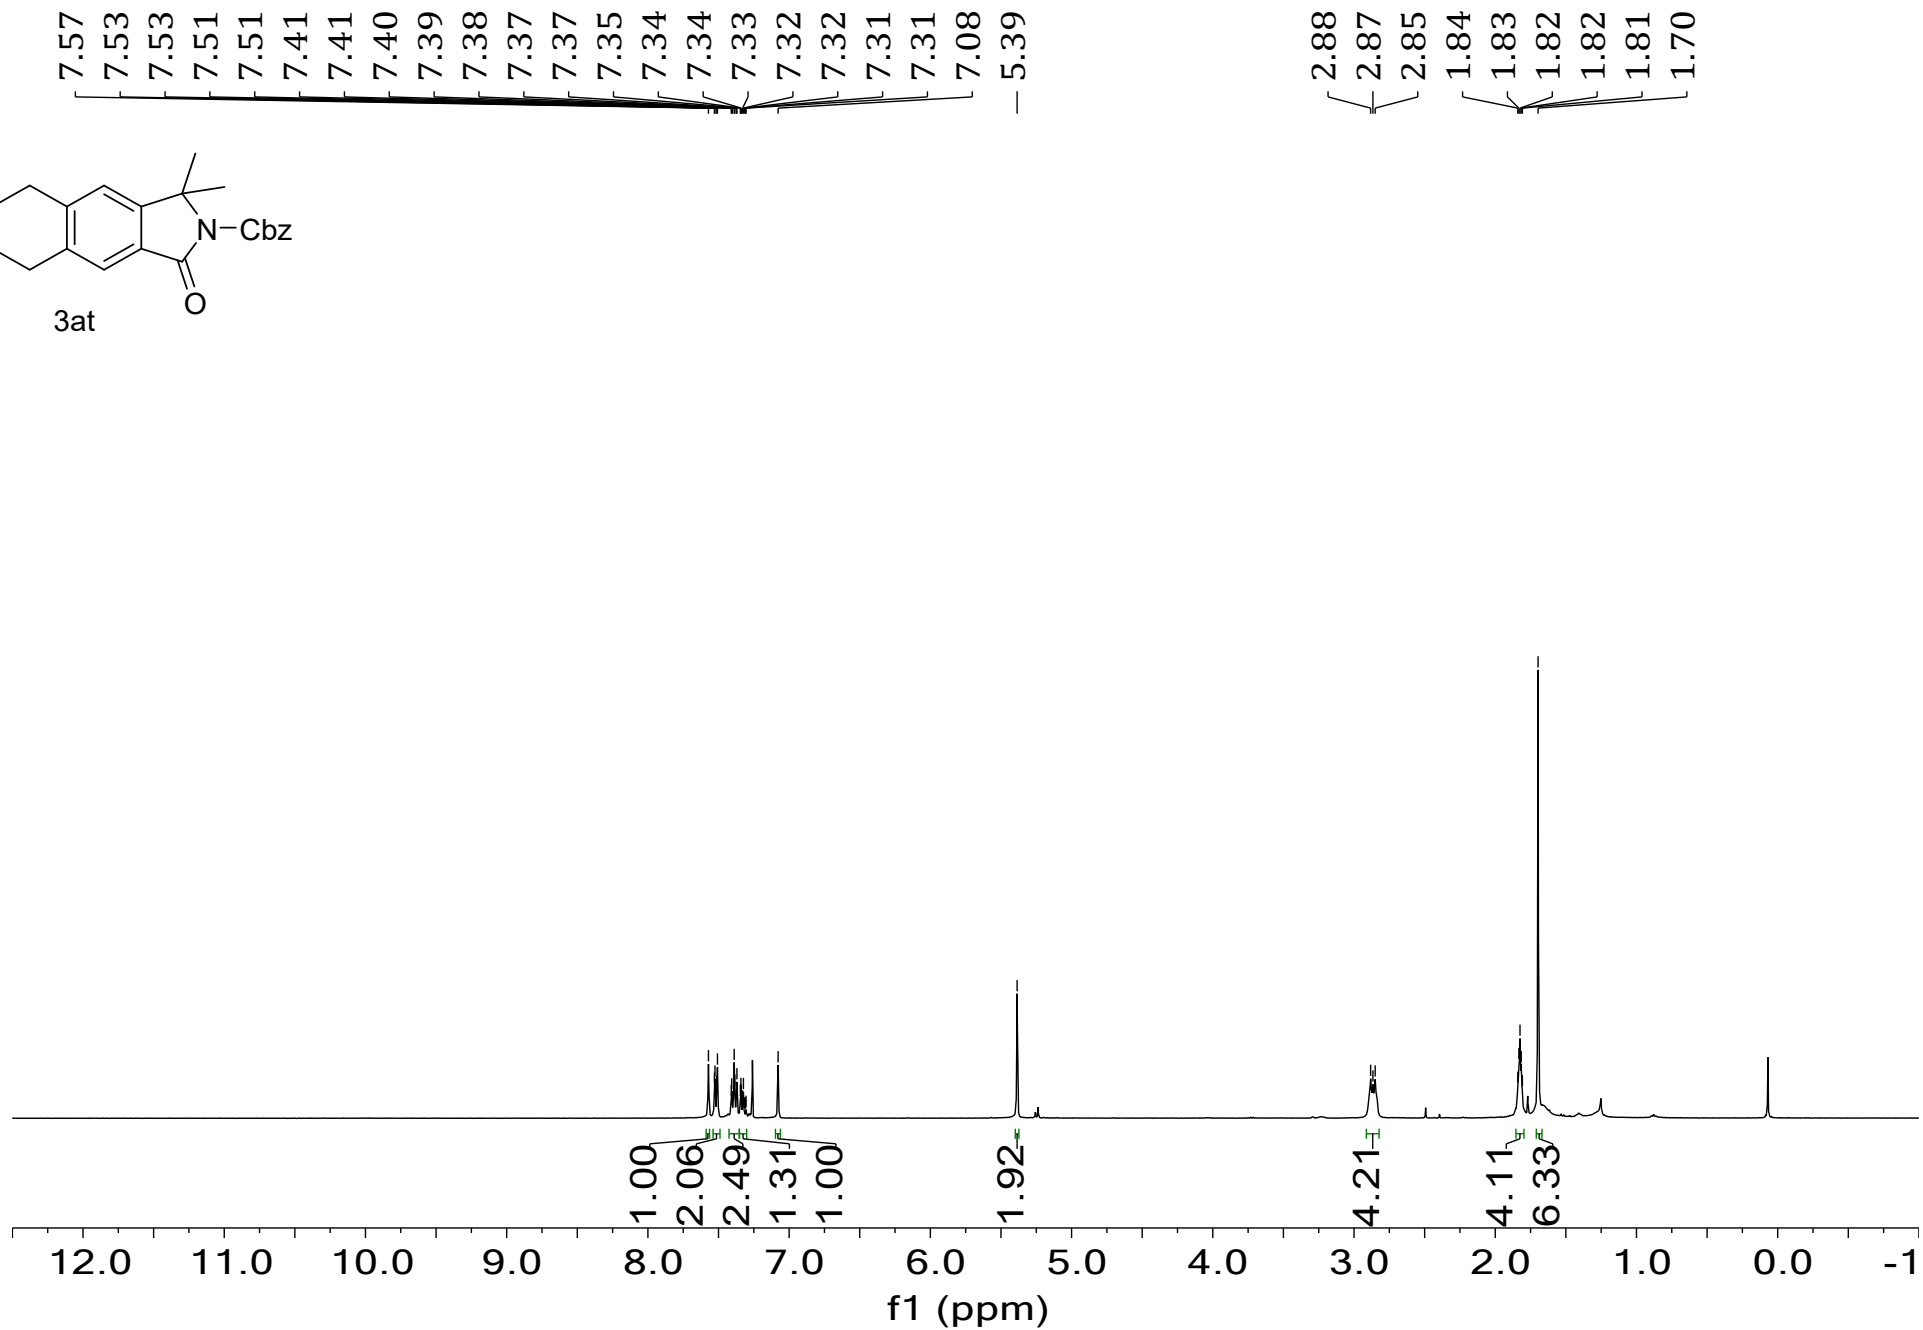

<sup>1</sup>H NMR (400 MHz, CDCl<sub>3</sub>) spectra of 3at.



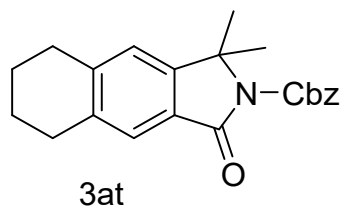

— 166.4  
/ 151.8  
/ 149.8  
/ 144.6  
/ 138.1  
/ 135.5  
/ 128.5  
/ 128.0  
/ 127.7  
/ 125.7  
/ 125.0  
/ 121.2

~ 67.6  
~ 64.2

/ 30.3  
/ 29.3  
- 26.4  
/ 22.7  
/ 22.6

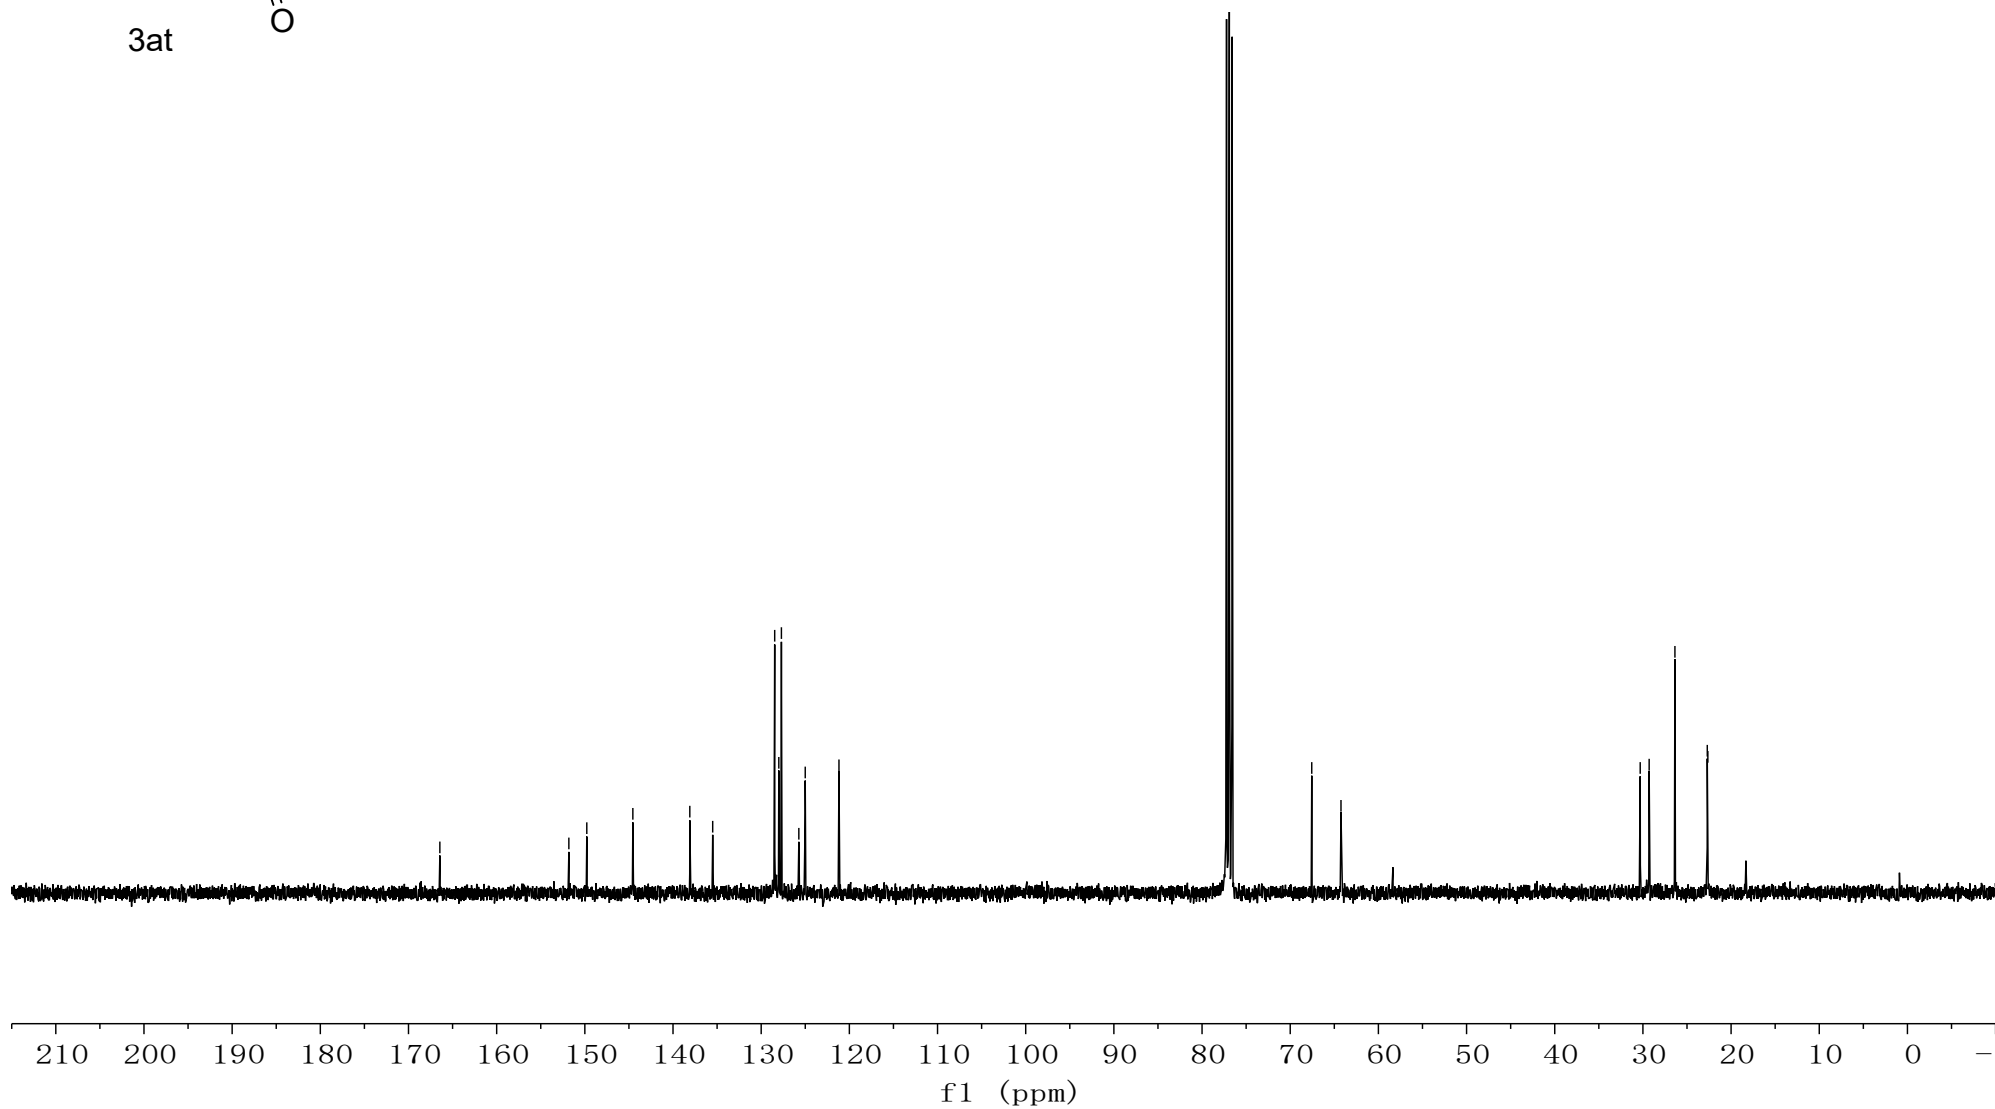

<sup>13</sup>C NMR (100 MHz, CDCl<sub>3</sub>) spectra of **3at**.

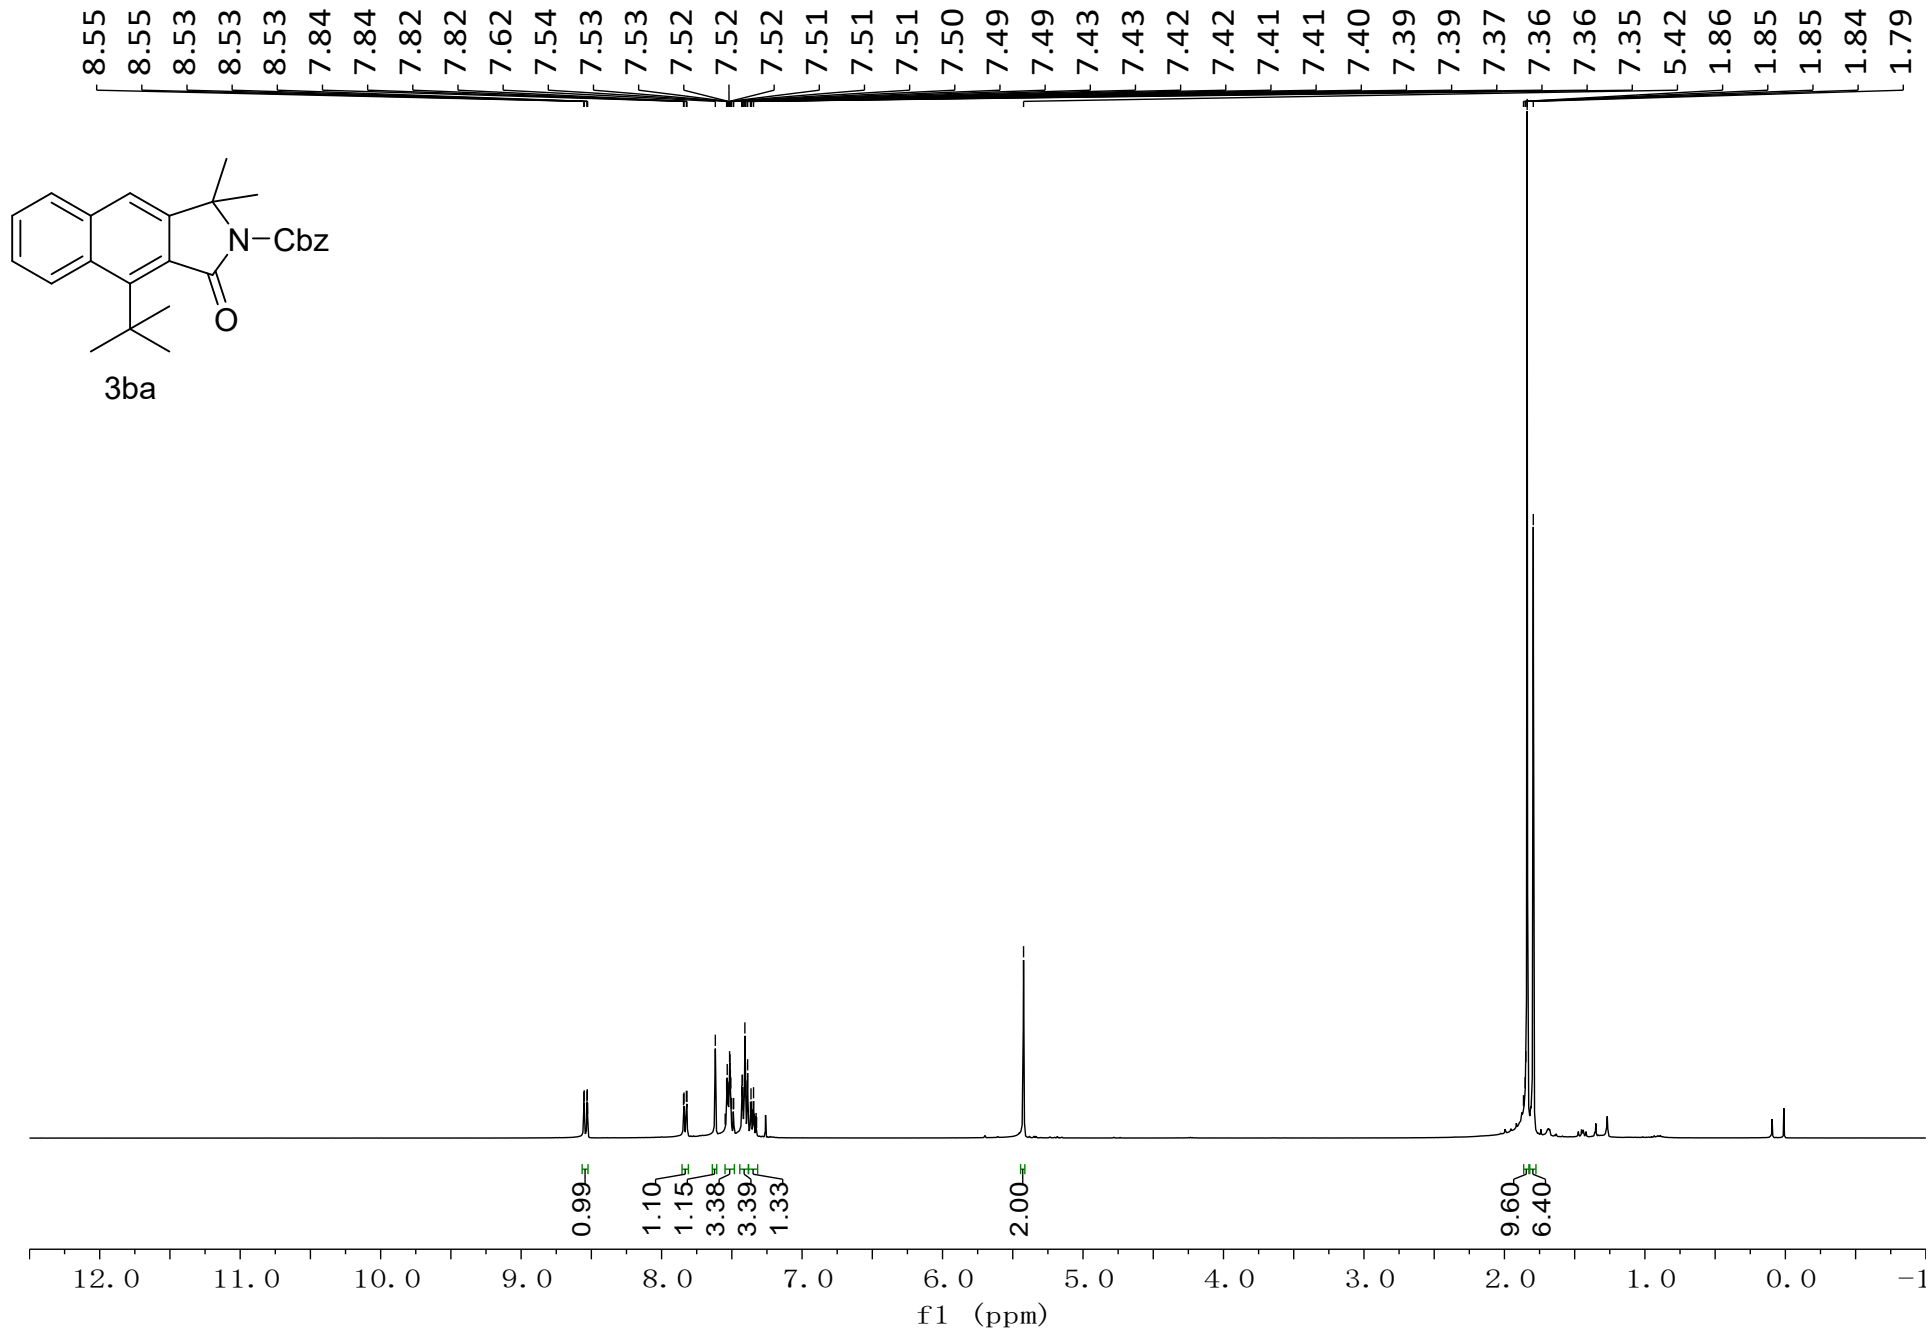

<sup>1</sup>H NMR (400 MHz, CDCl<sub>3</sub>) spectra of **3ba**.

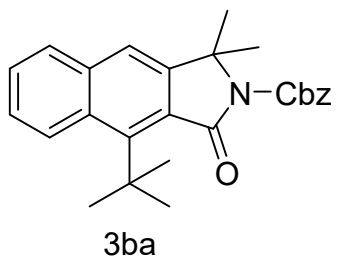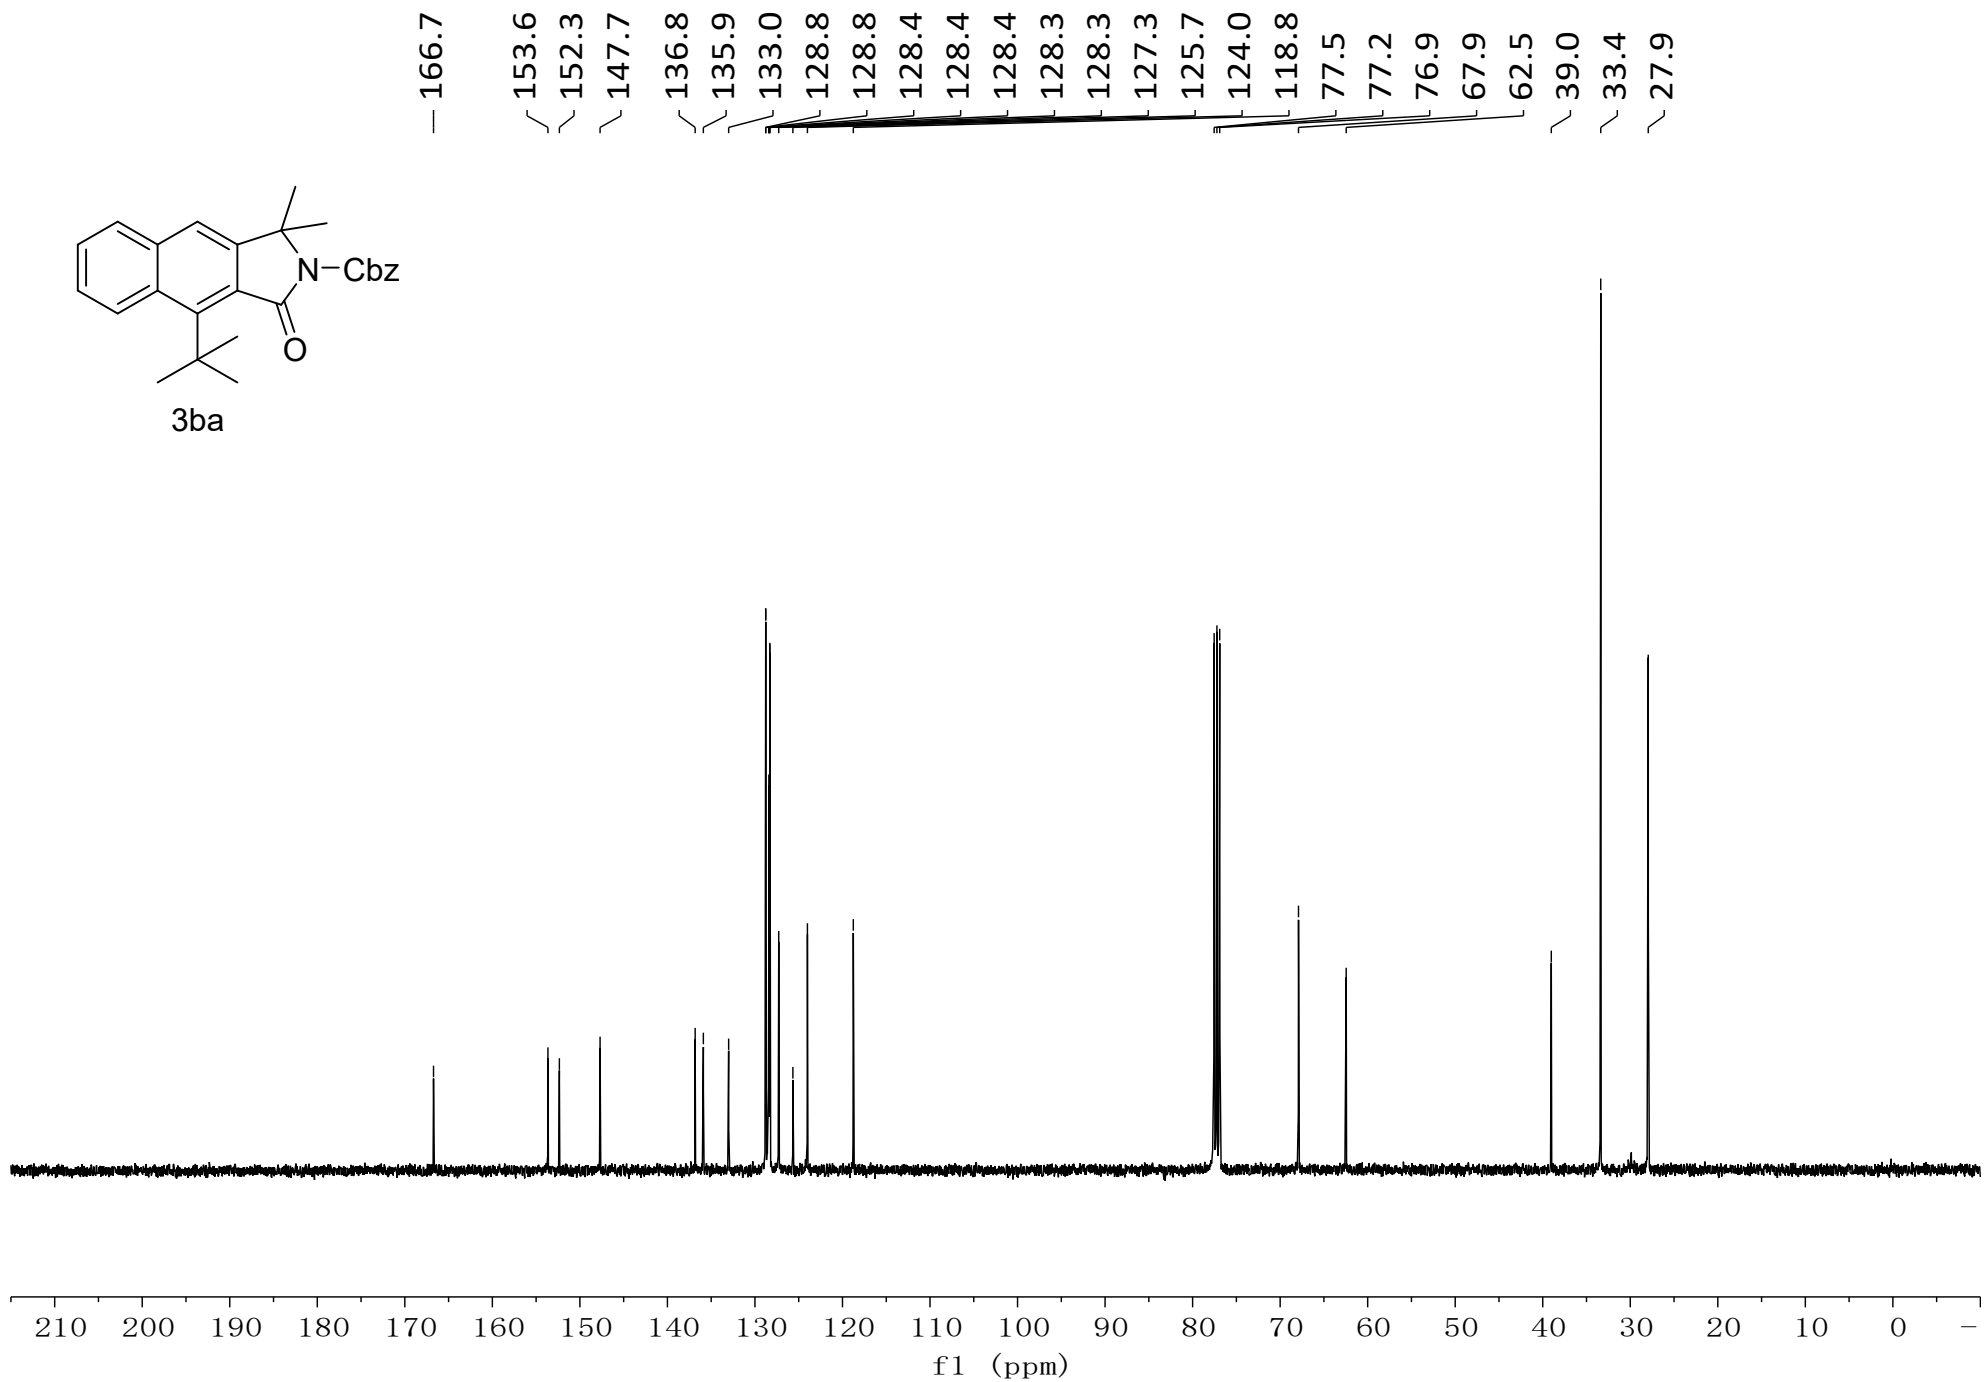

<sup>13</sup>C NMR (100 MHz, CDCl<sub>3</sub>) spectra of **3ba**.

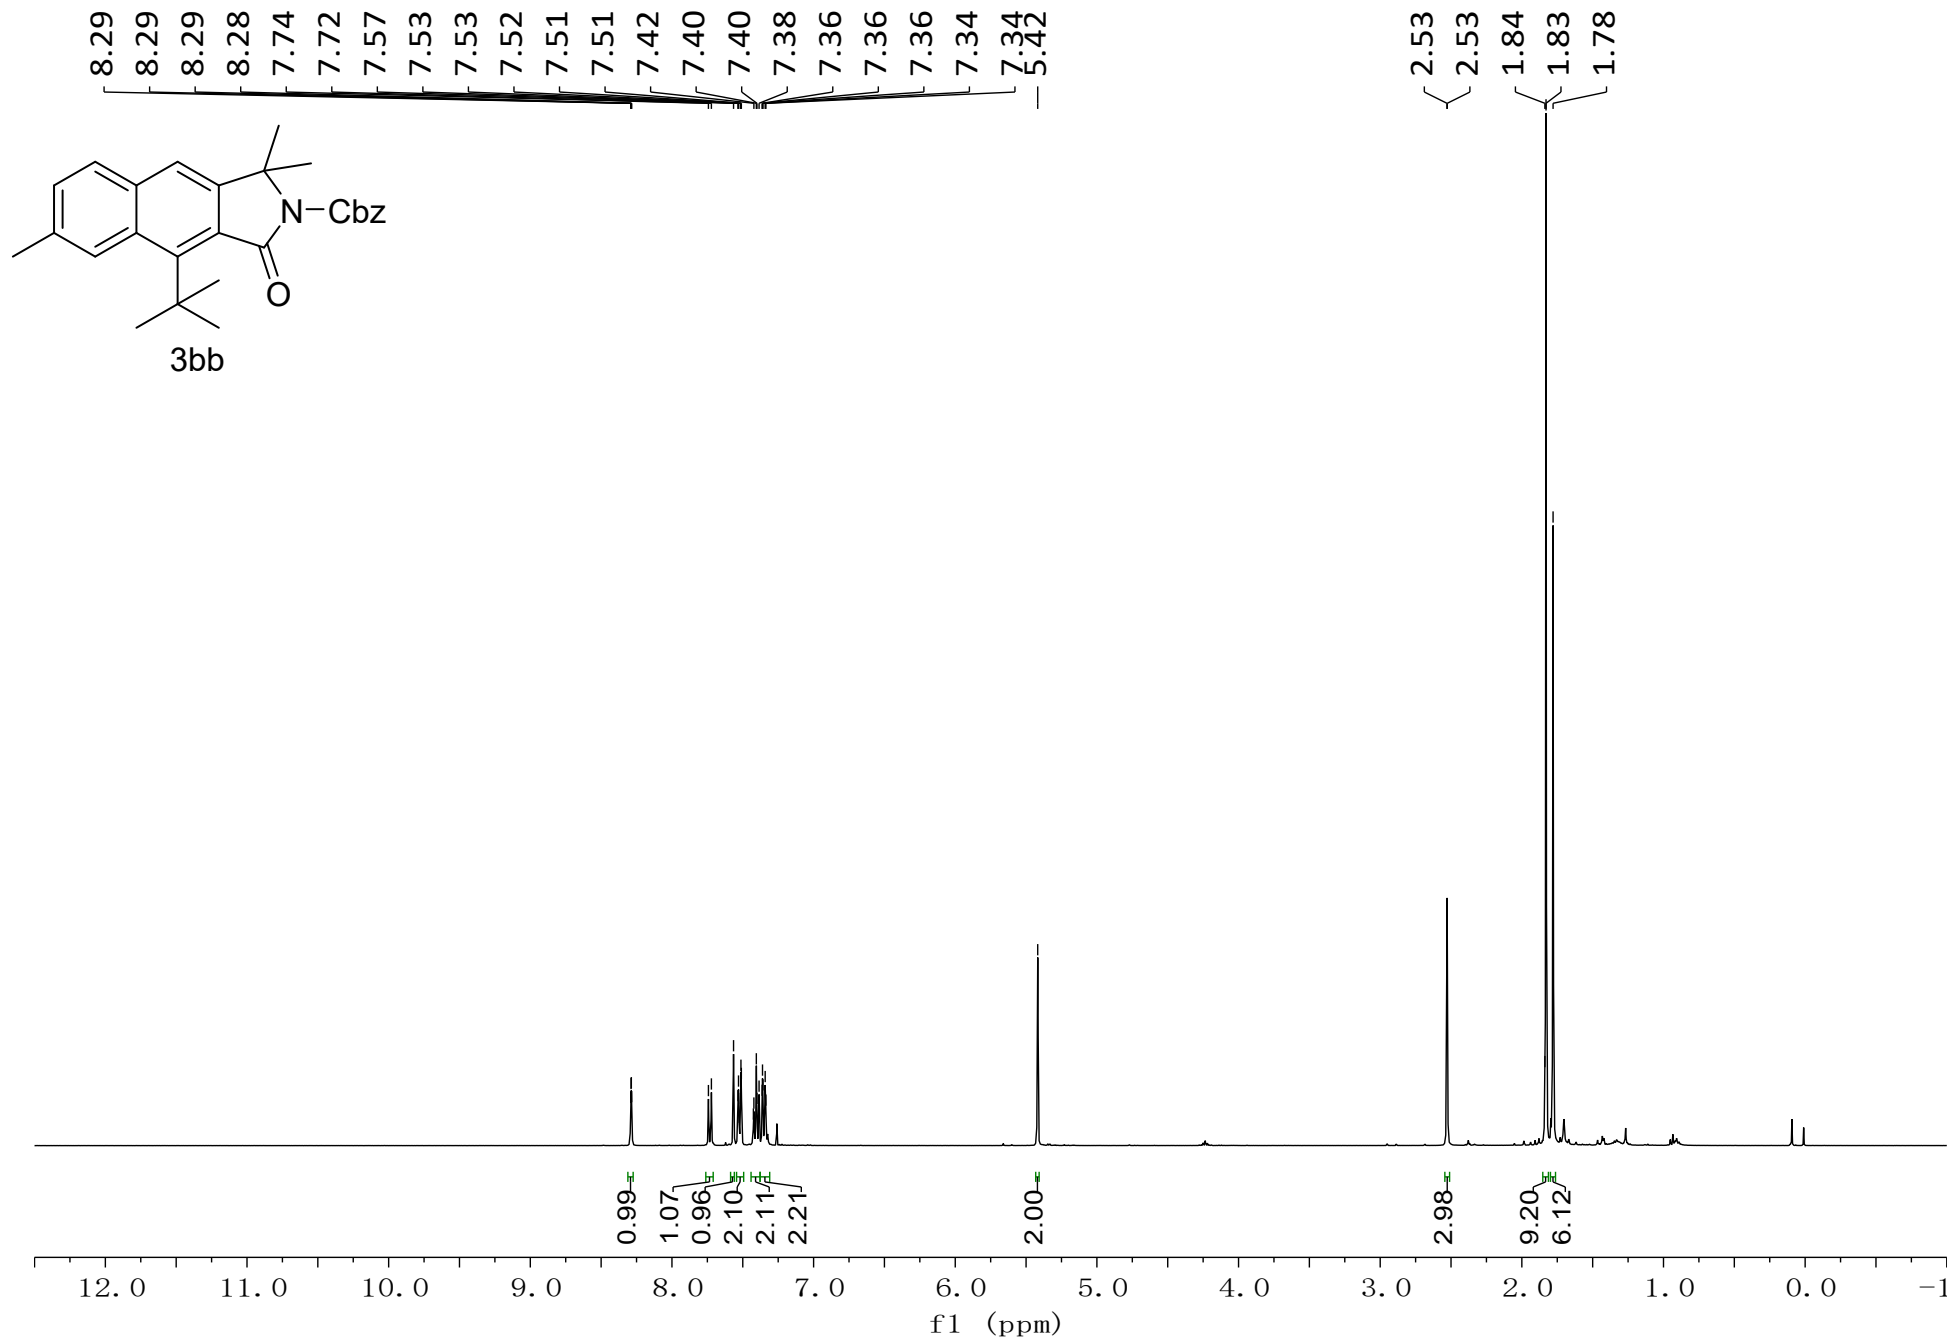

$^1\text{H NMR}$  (400 MHz,  $\text{CDCl}_3$ ) spectra of **3bb**.

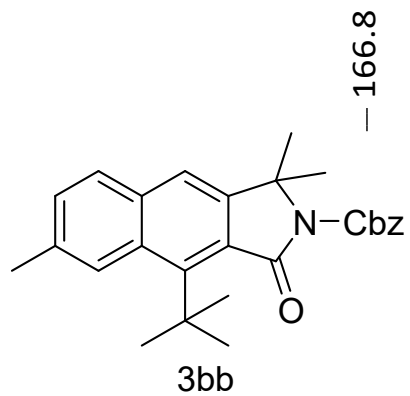

- 166.8
- { 152.6
- { 152.4
- { 146.9
- { 135.9
- { 135.1
- { 133.5
- { 133.2
- { 129.6
- { 128.7
- { 128.3
- { 128.3
- { 128.2
- { 127.4
- { 125.7
- { 118.4
- 67.8
- 62.4
- 38.9
- 33.3
- 27.9
- 22.4

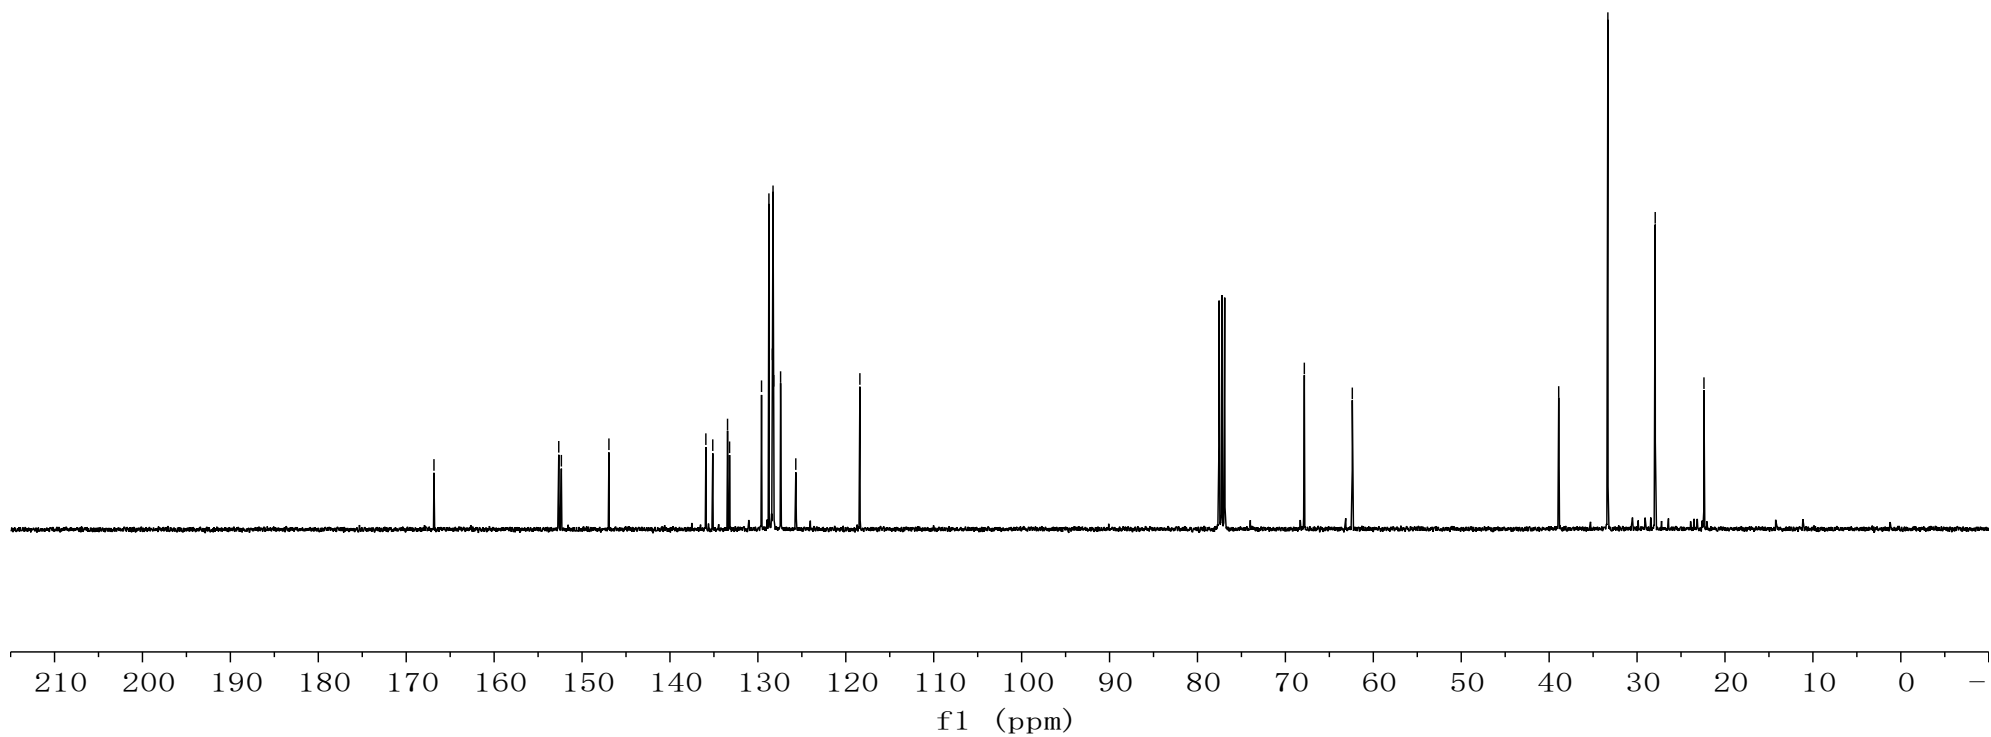

<sup>13</sup>C NMR (100 MHz, CDCl<sub>3</sub>) spectra of **3bb**.

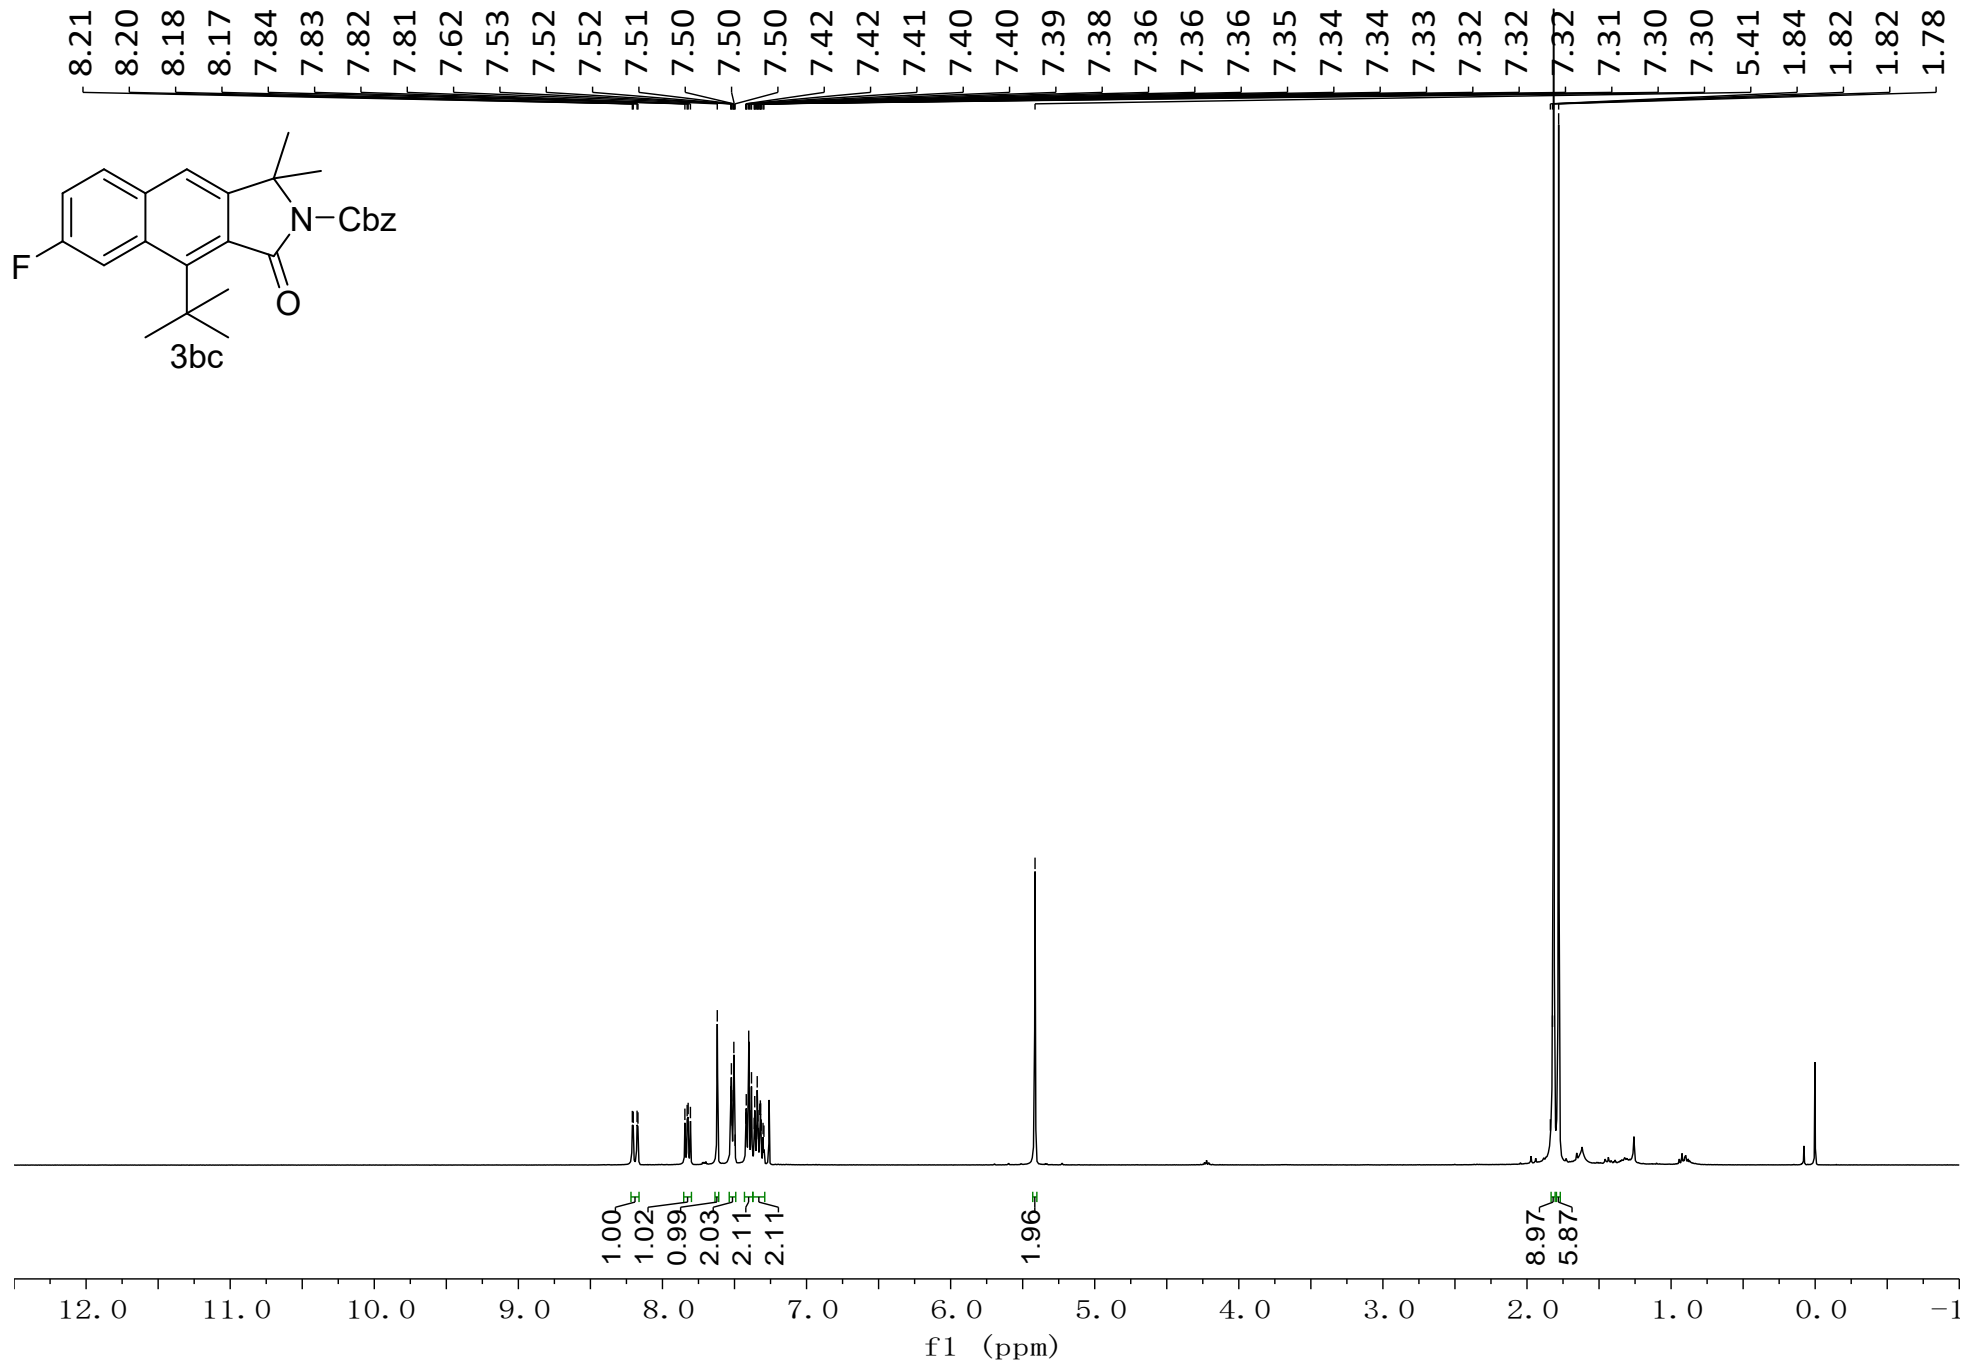

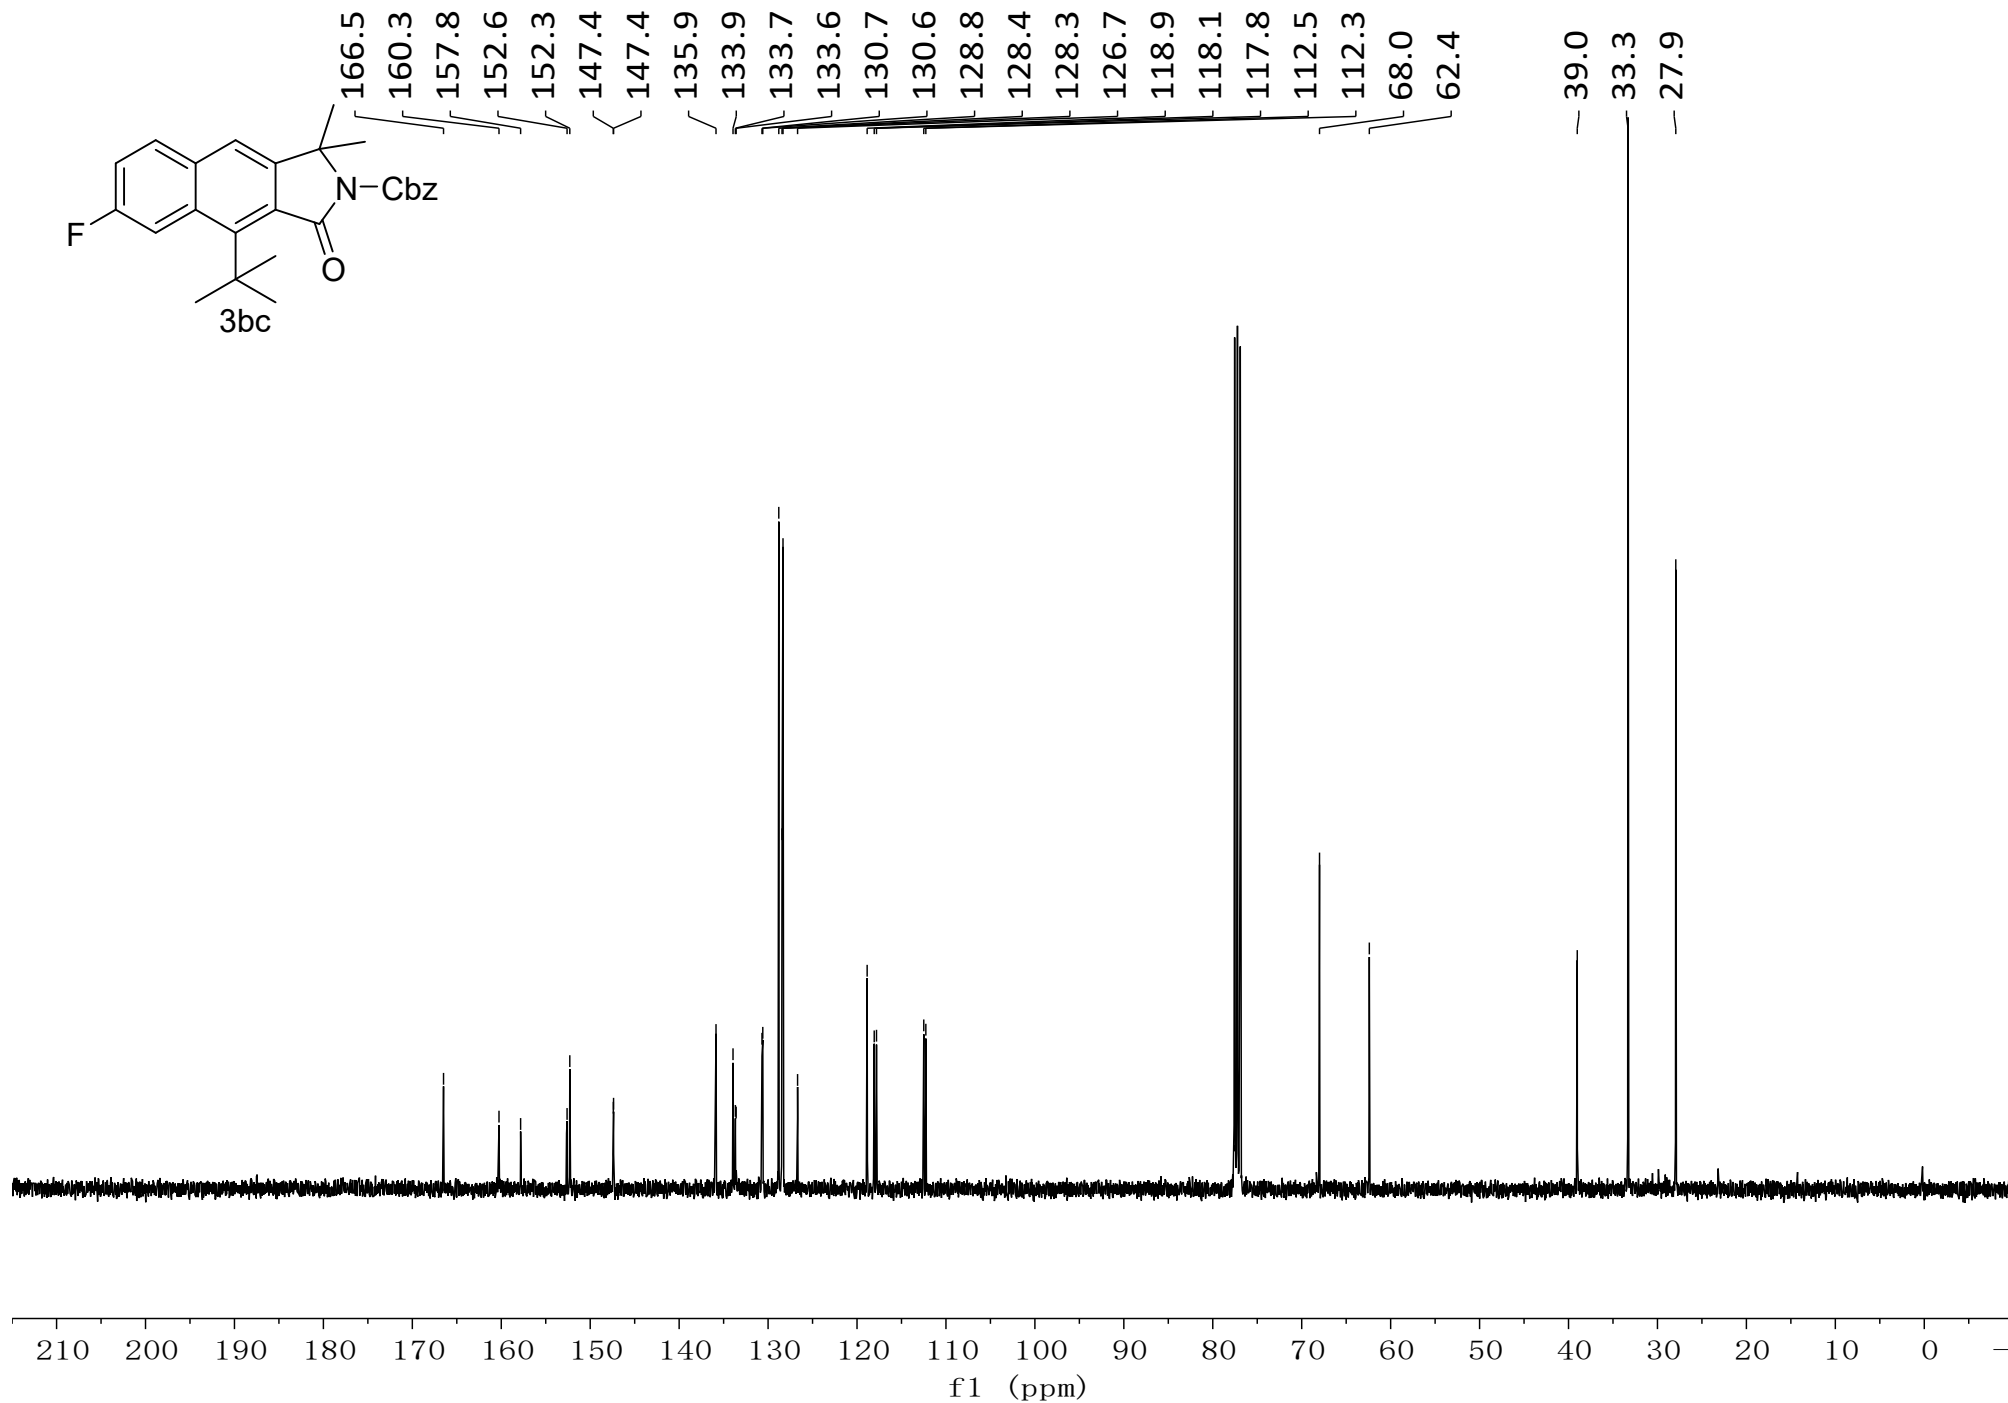

$^{13}\text{C}$  NMR (100 MHz,  $\text{CDCl}_3$ ) spectra of **3bc**.

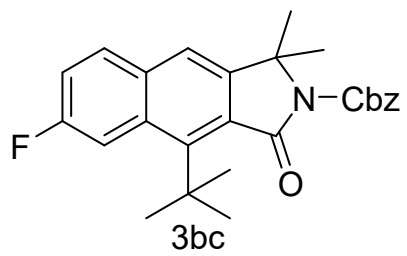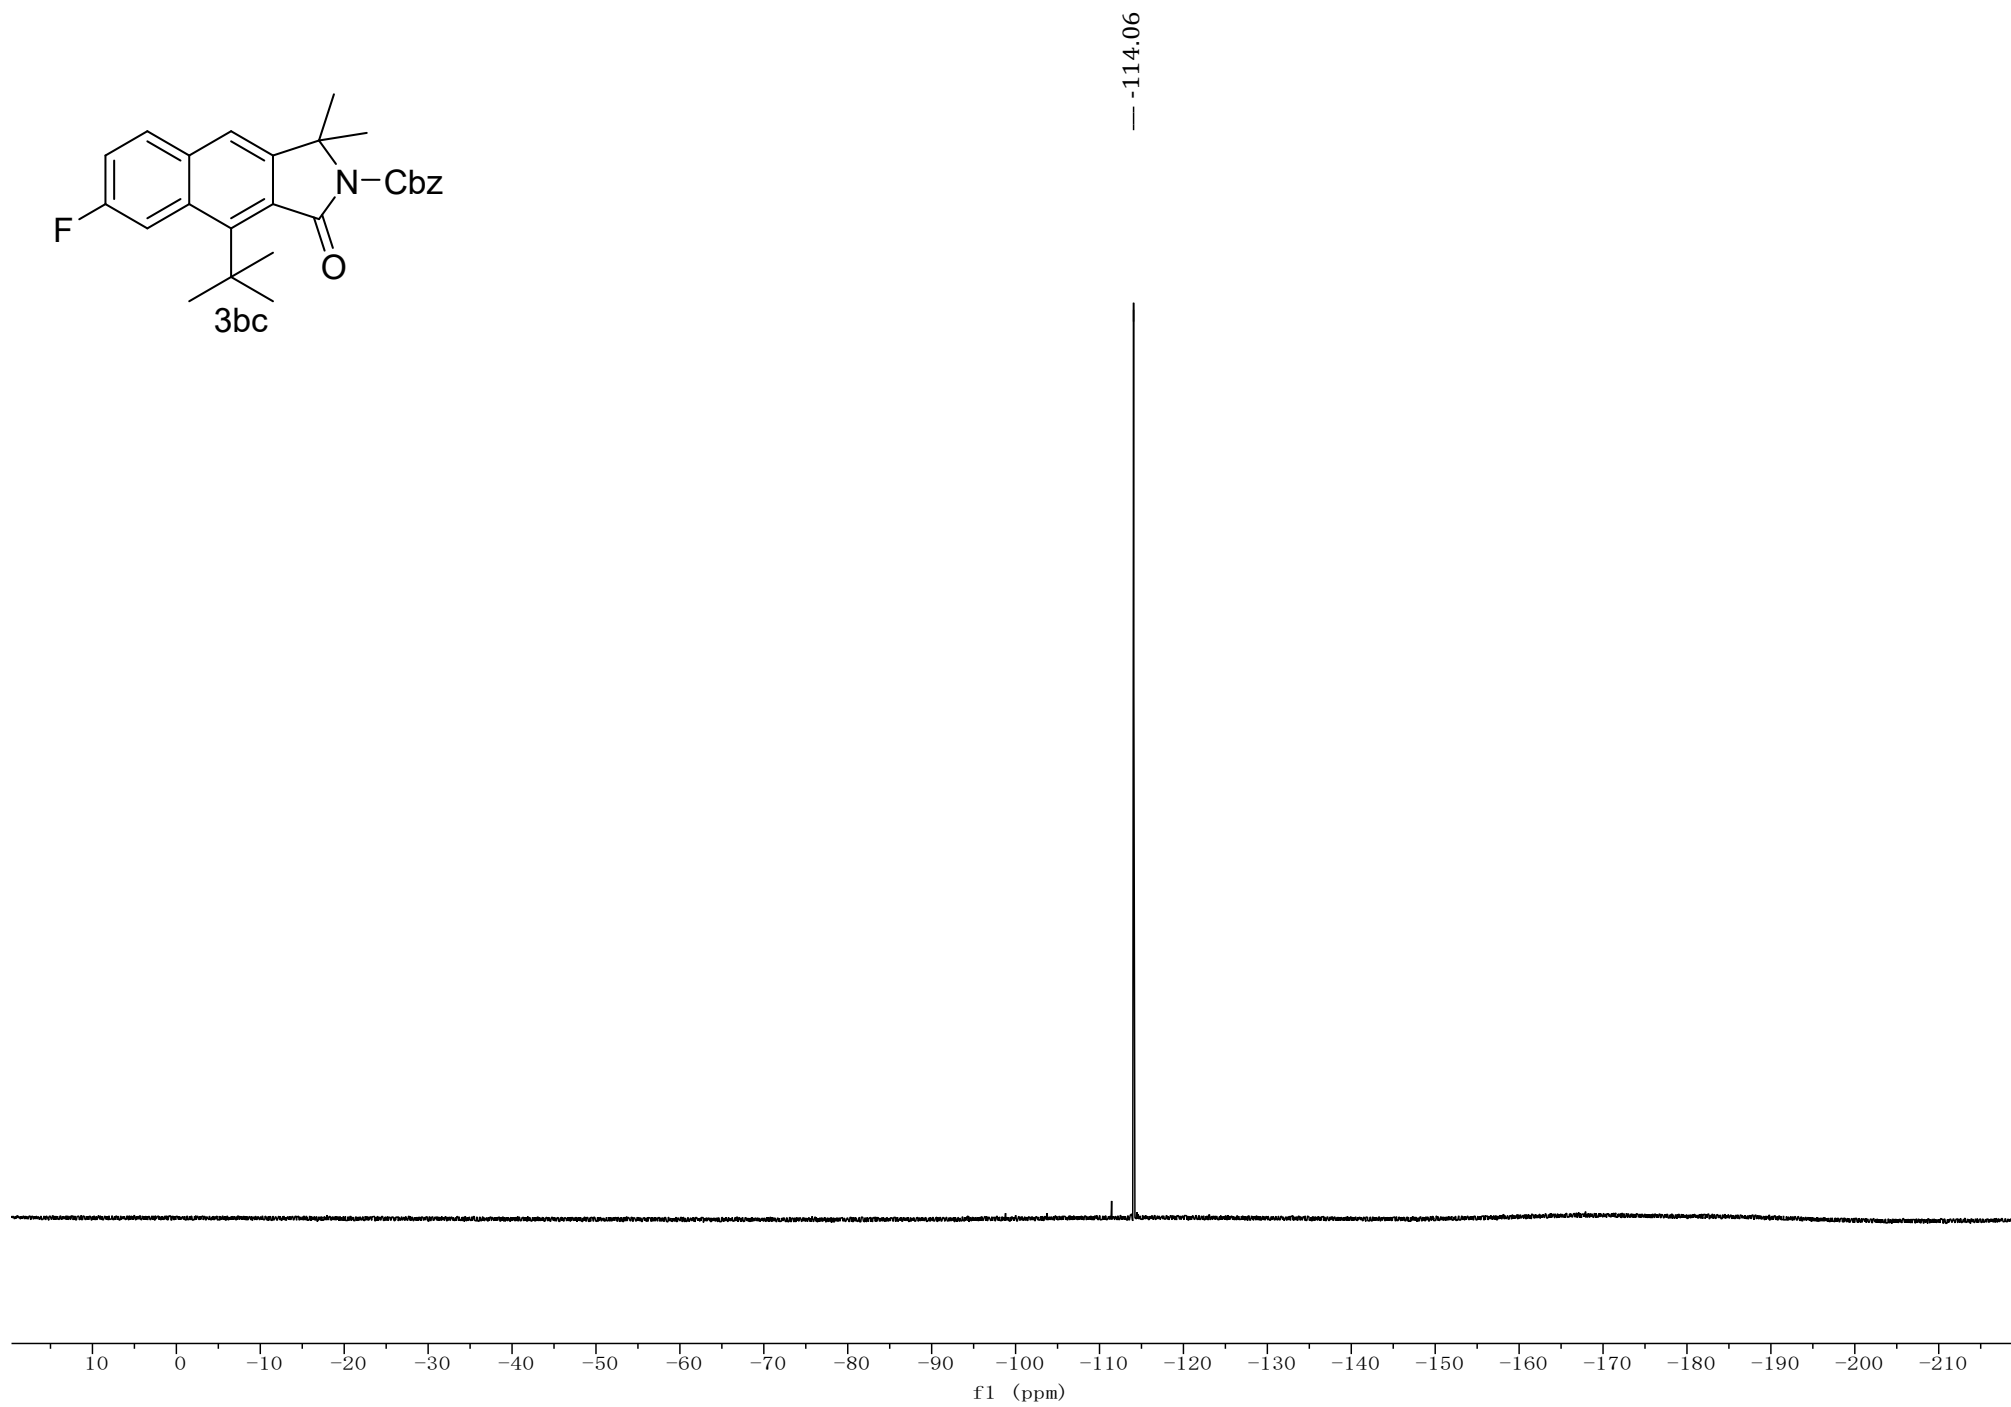

$^{19}\text{F}$  NMR (400 MHz,  $\text{CDCl}_3$ ) spectra of **3bc**.



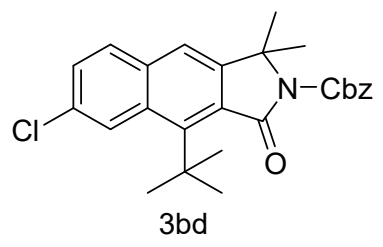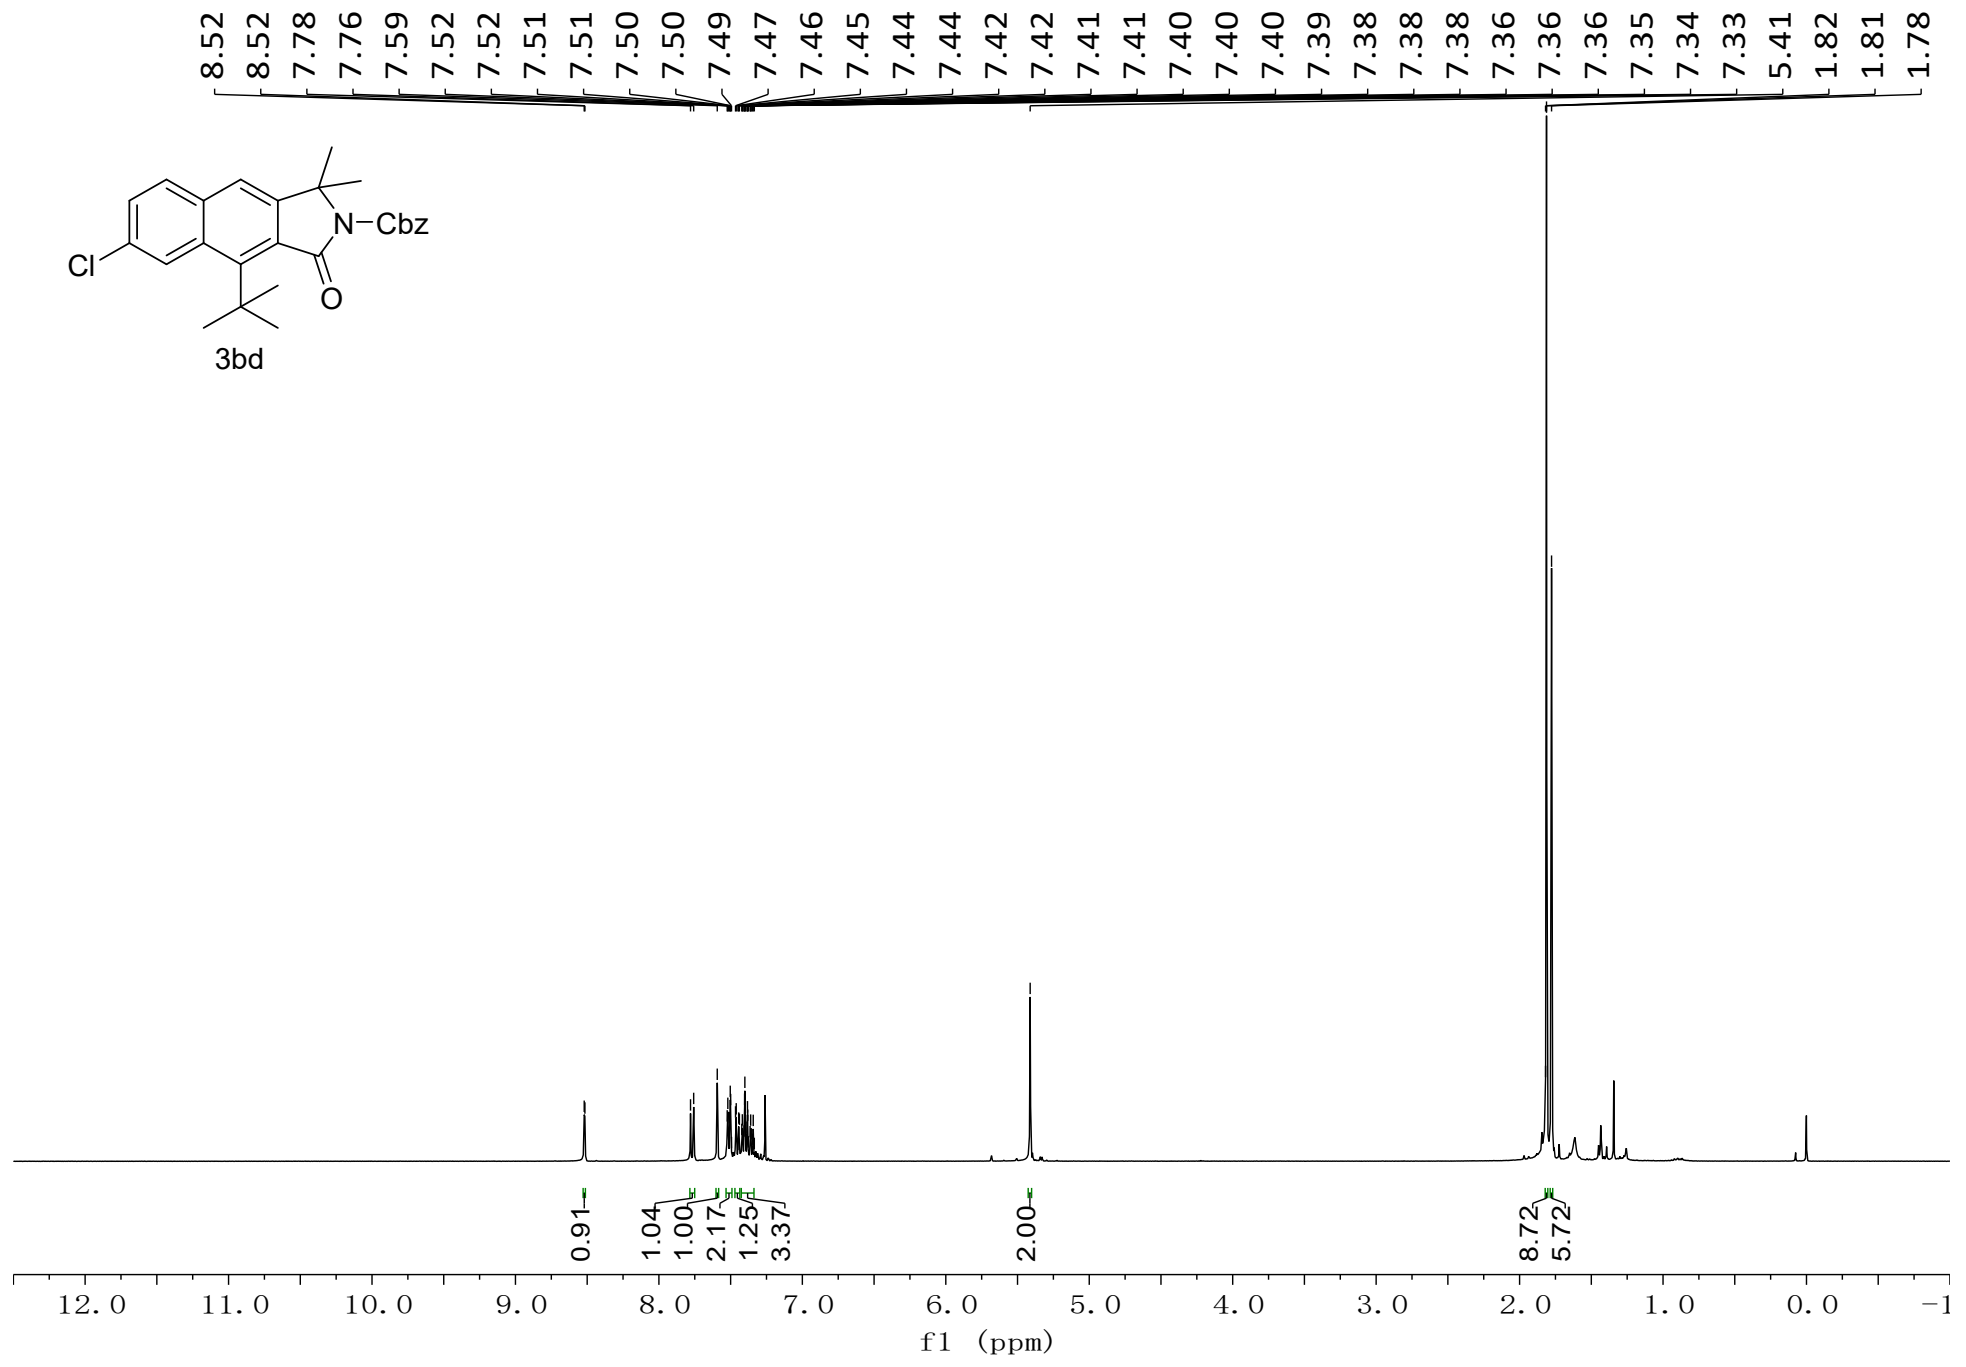

<sup>1</sup>H NMR (400 MHz, CDCl<sub>3</sub>) spectra of **3bd**.

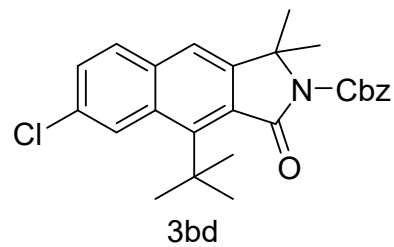

166.4  
152.8  
152.3  
148.2  
135.8  
135.1  
133.5  
130.2  
129.9  
128.8  
128.5  
128.3  
128.2  
127.4  
126.7  
118.8

68.0  
62.5

39.0  
33.4  
27.9

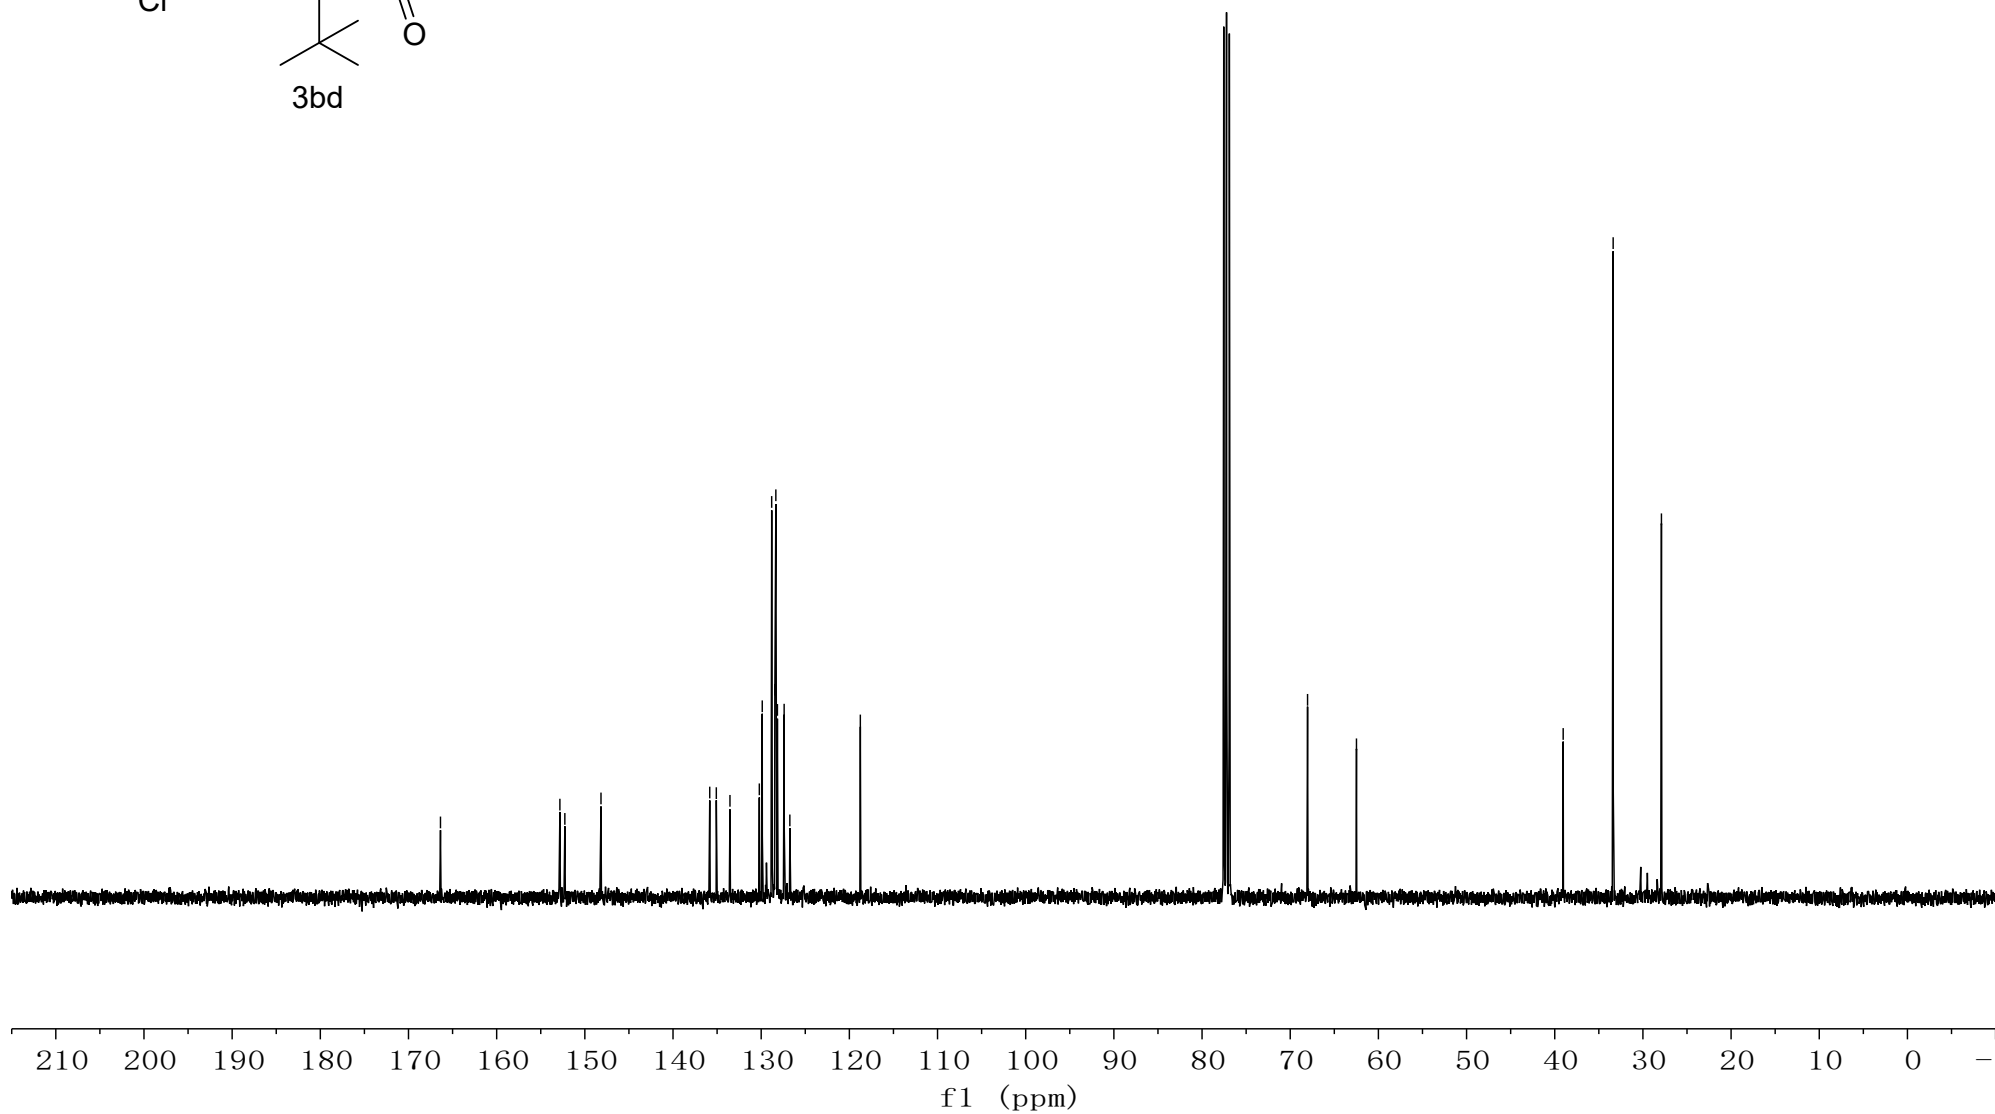

<sup>13</sup>C NMR (100 MHz, CDCl<sub>3</sub>) spectra of **3bd**.

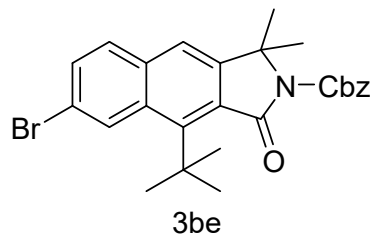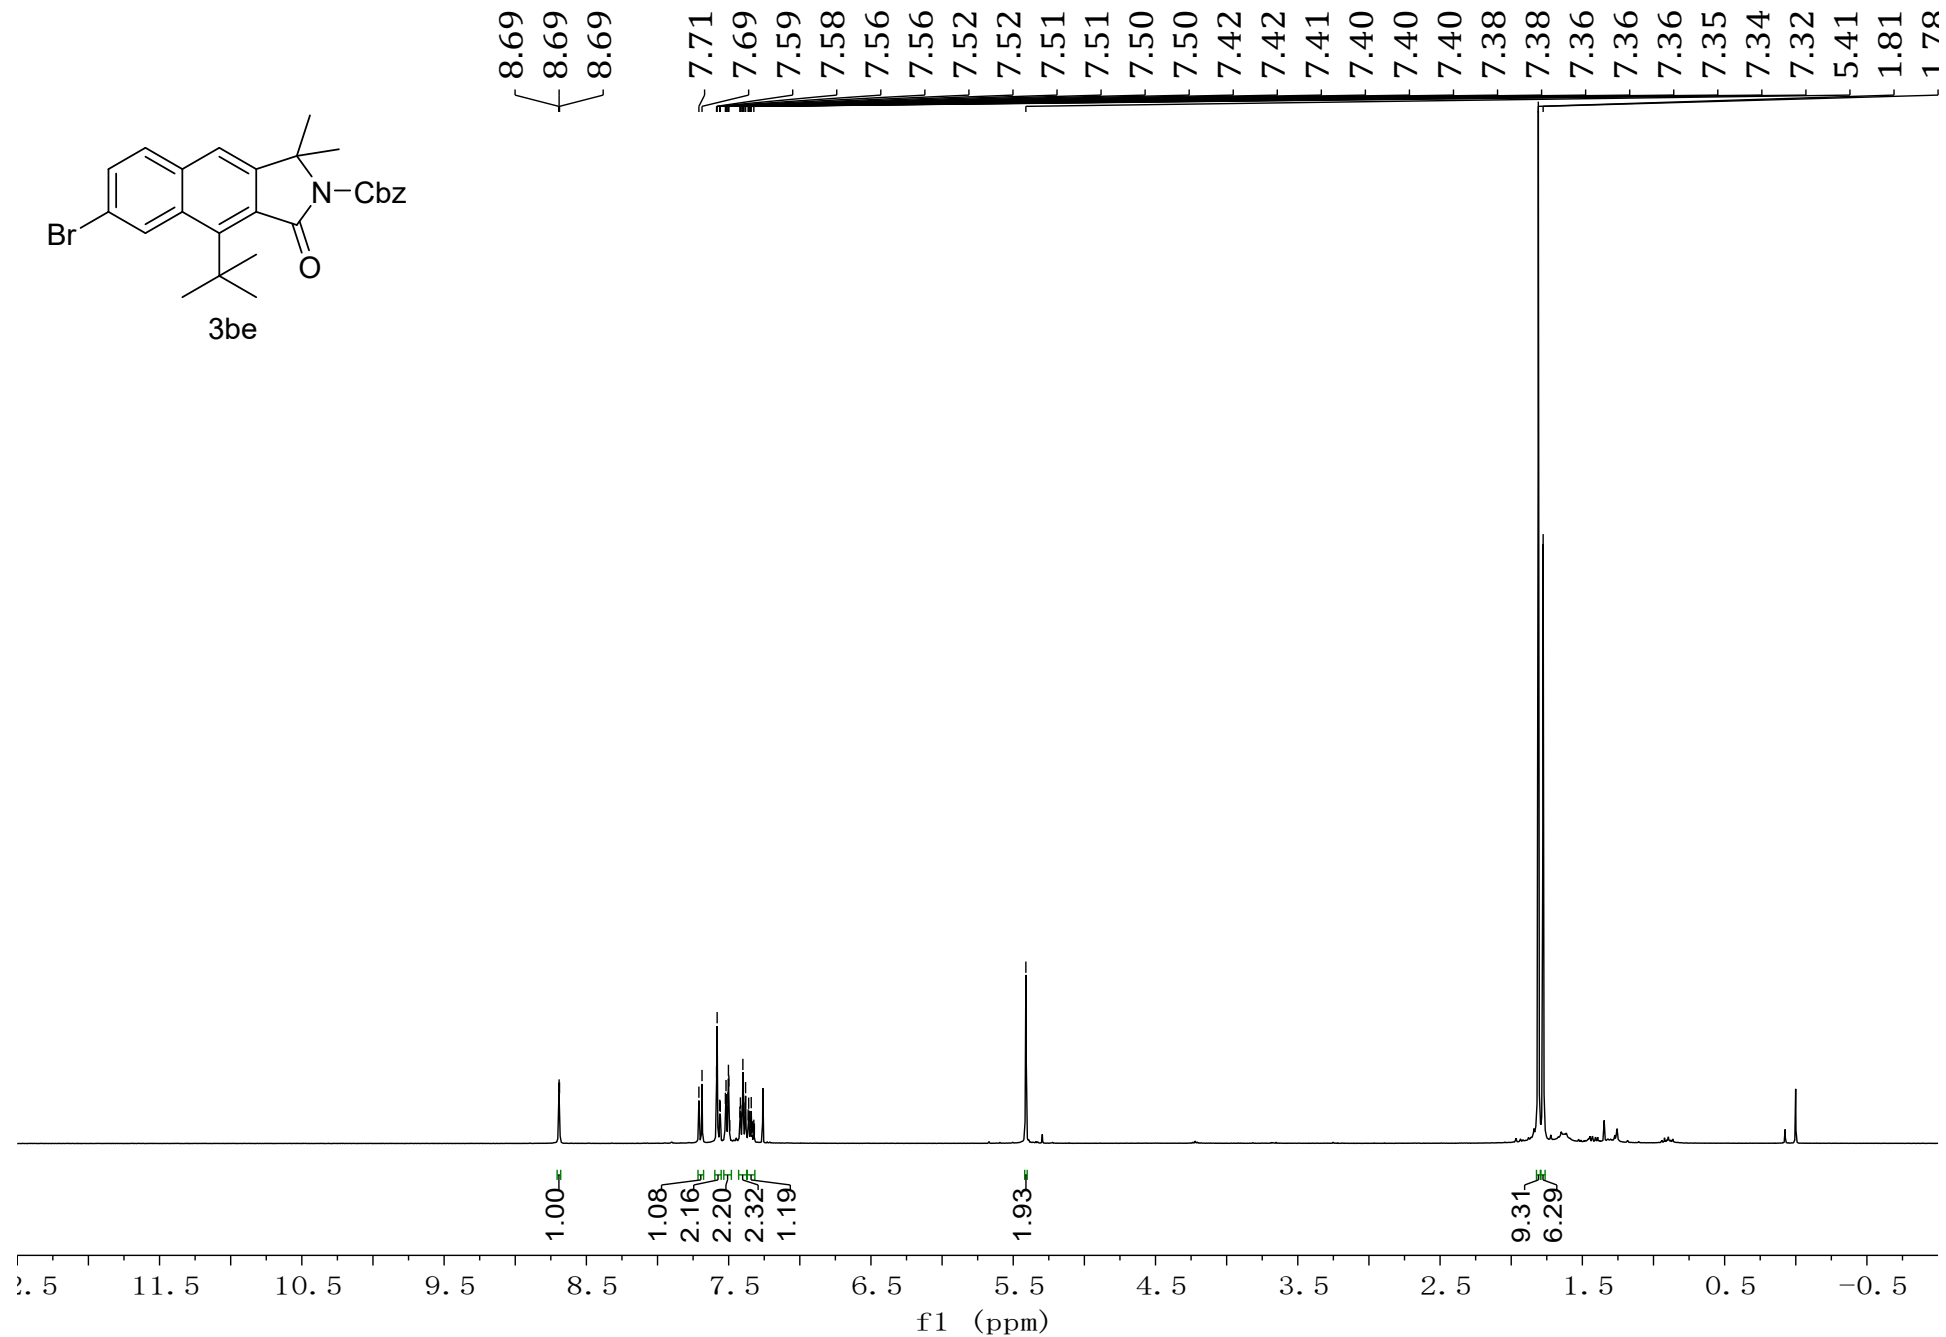

$^1\text{H}$  NMR (400 MHz,  $\text{CDCl}_3$ ) spectra of **3be**.

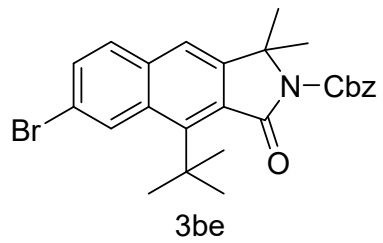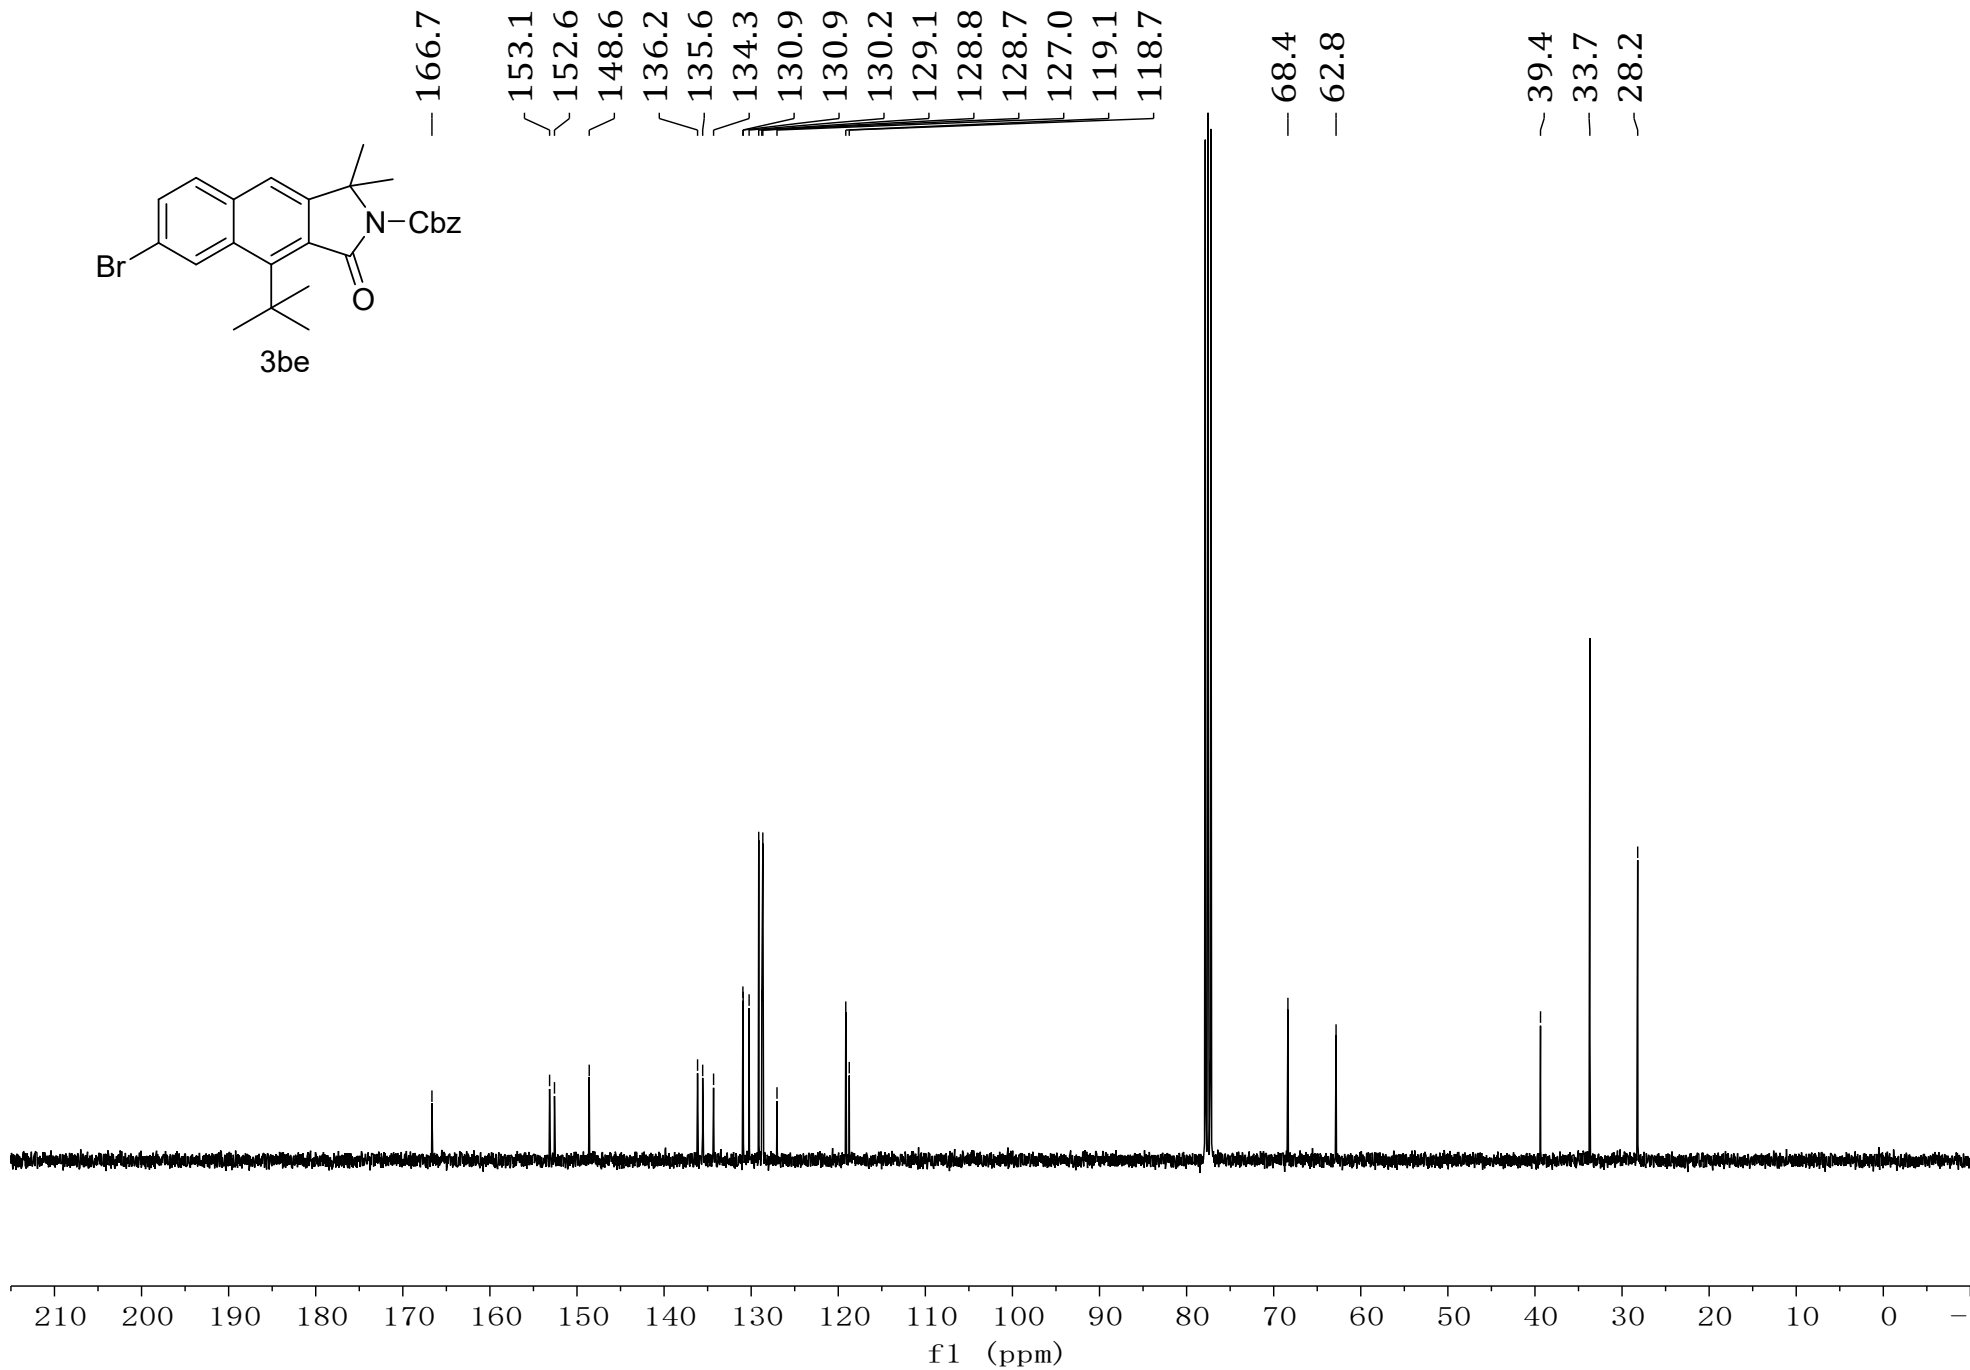

<sup>13</sup>C NMR (100 MHz, CDCl<sub>3</sub>) spectra of **3be**.

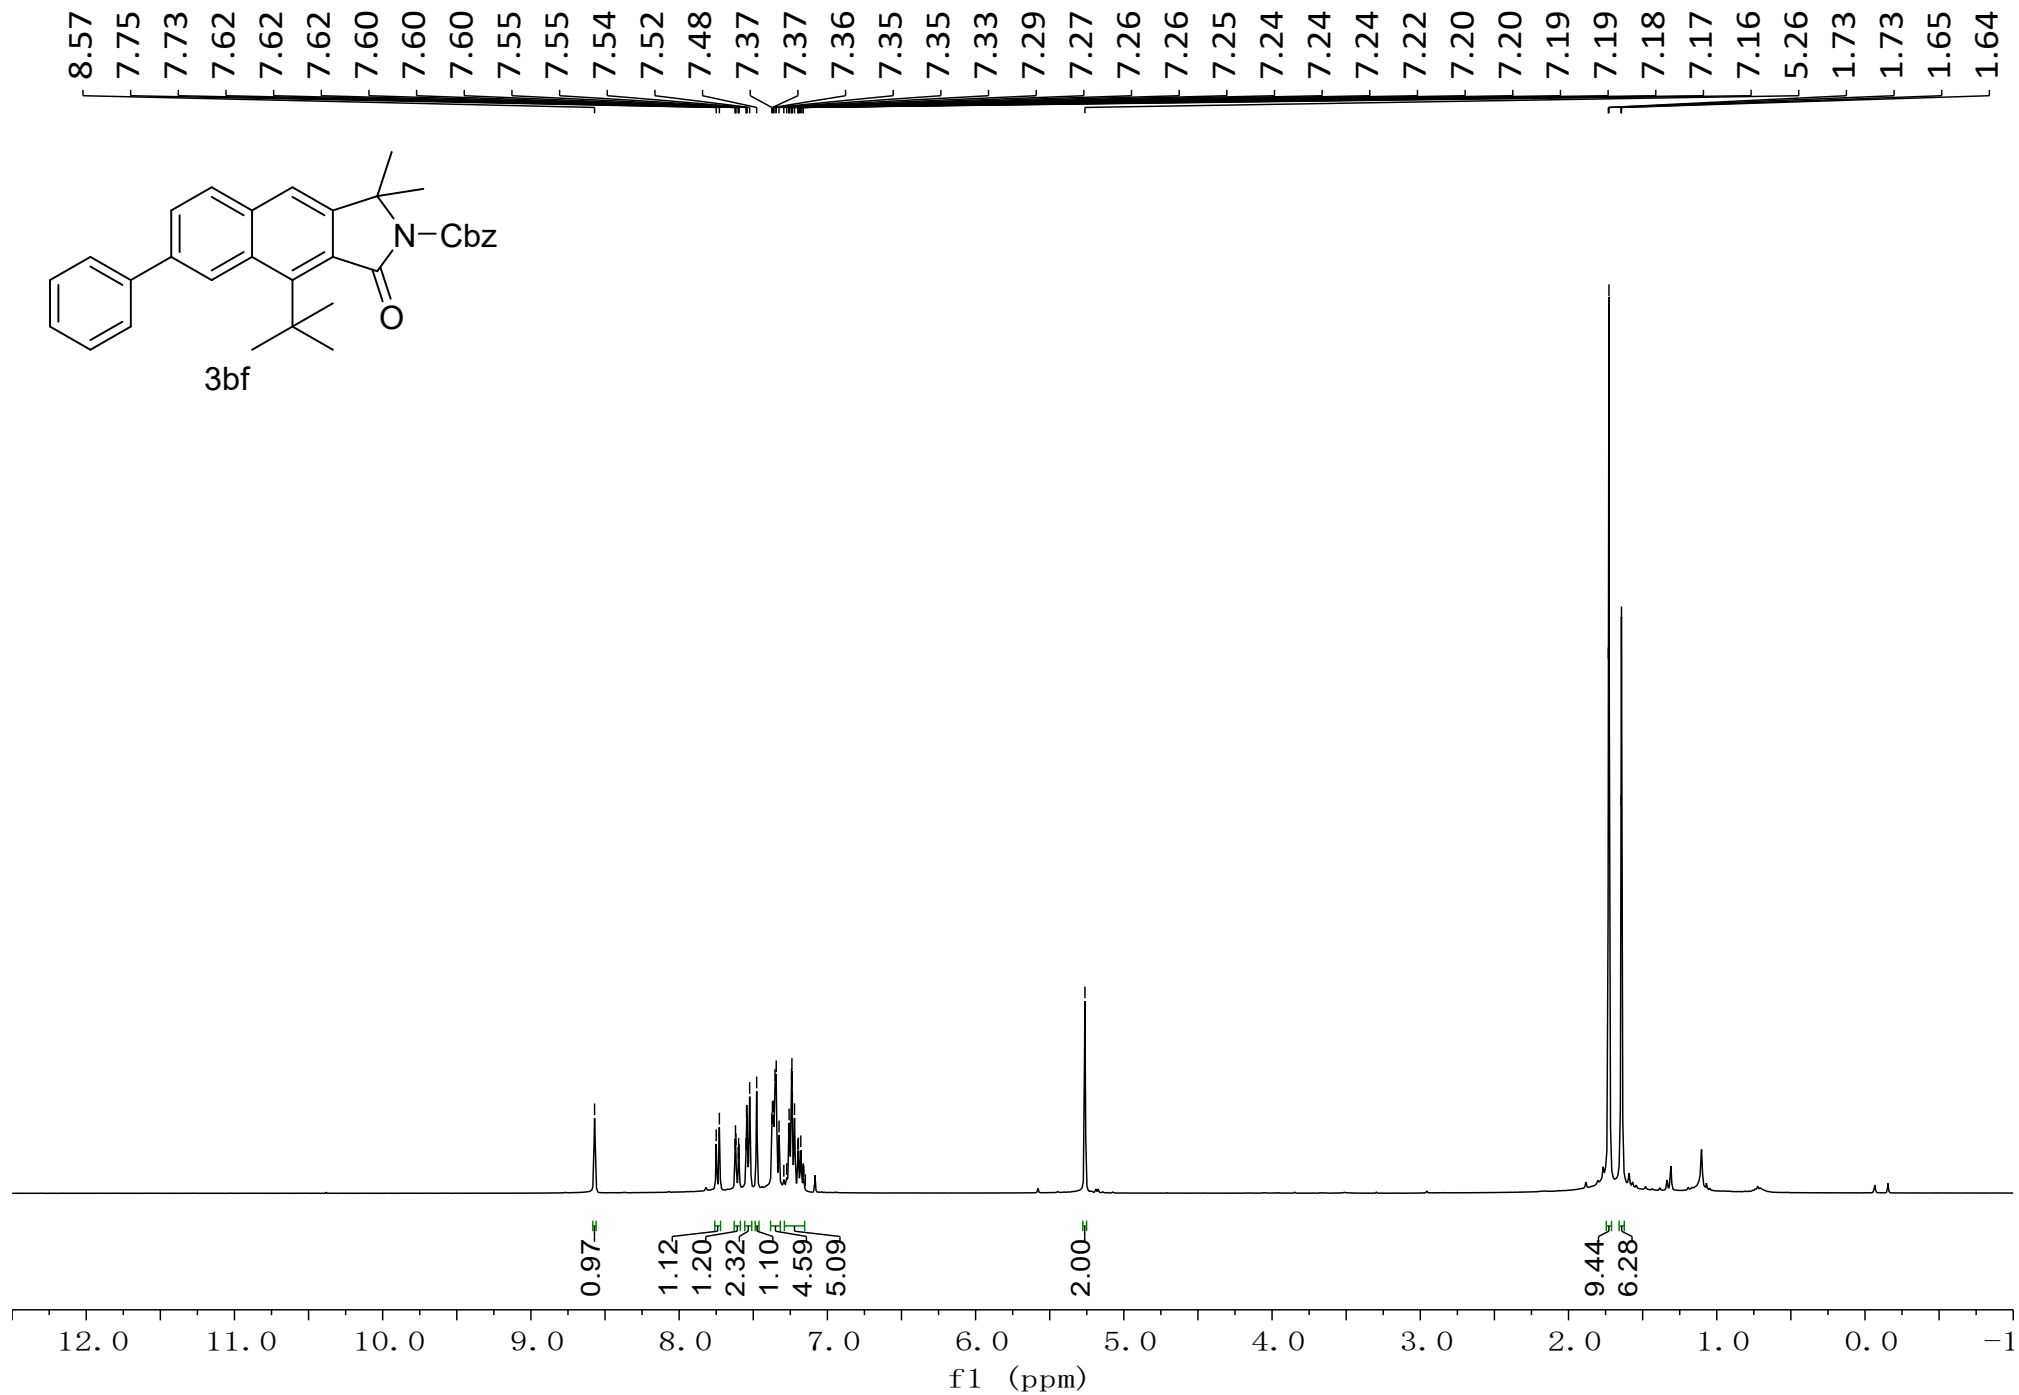

<sup>1</sup>H NMR (400 MHz, CDCl<sub>3</sub>) spectra of **3bf**.

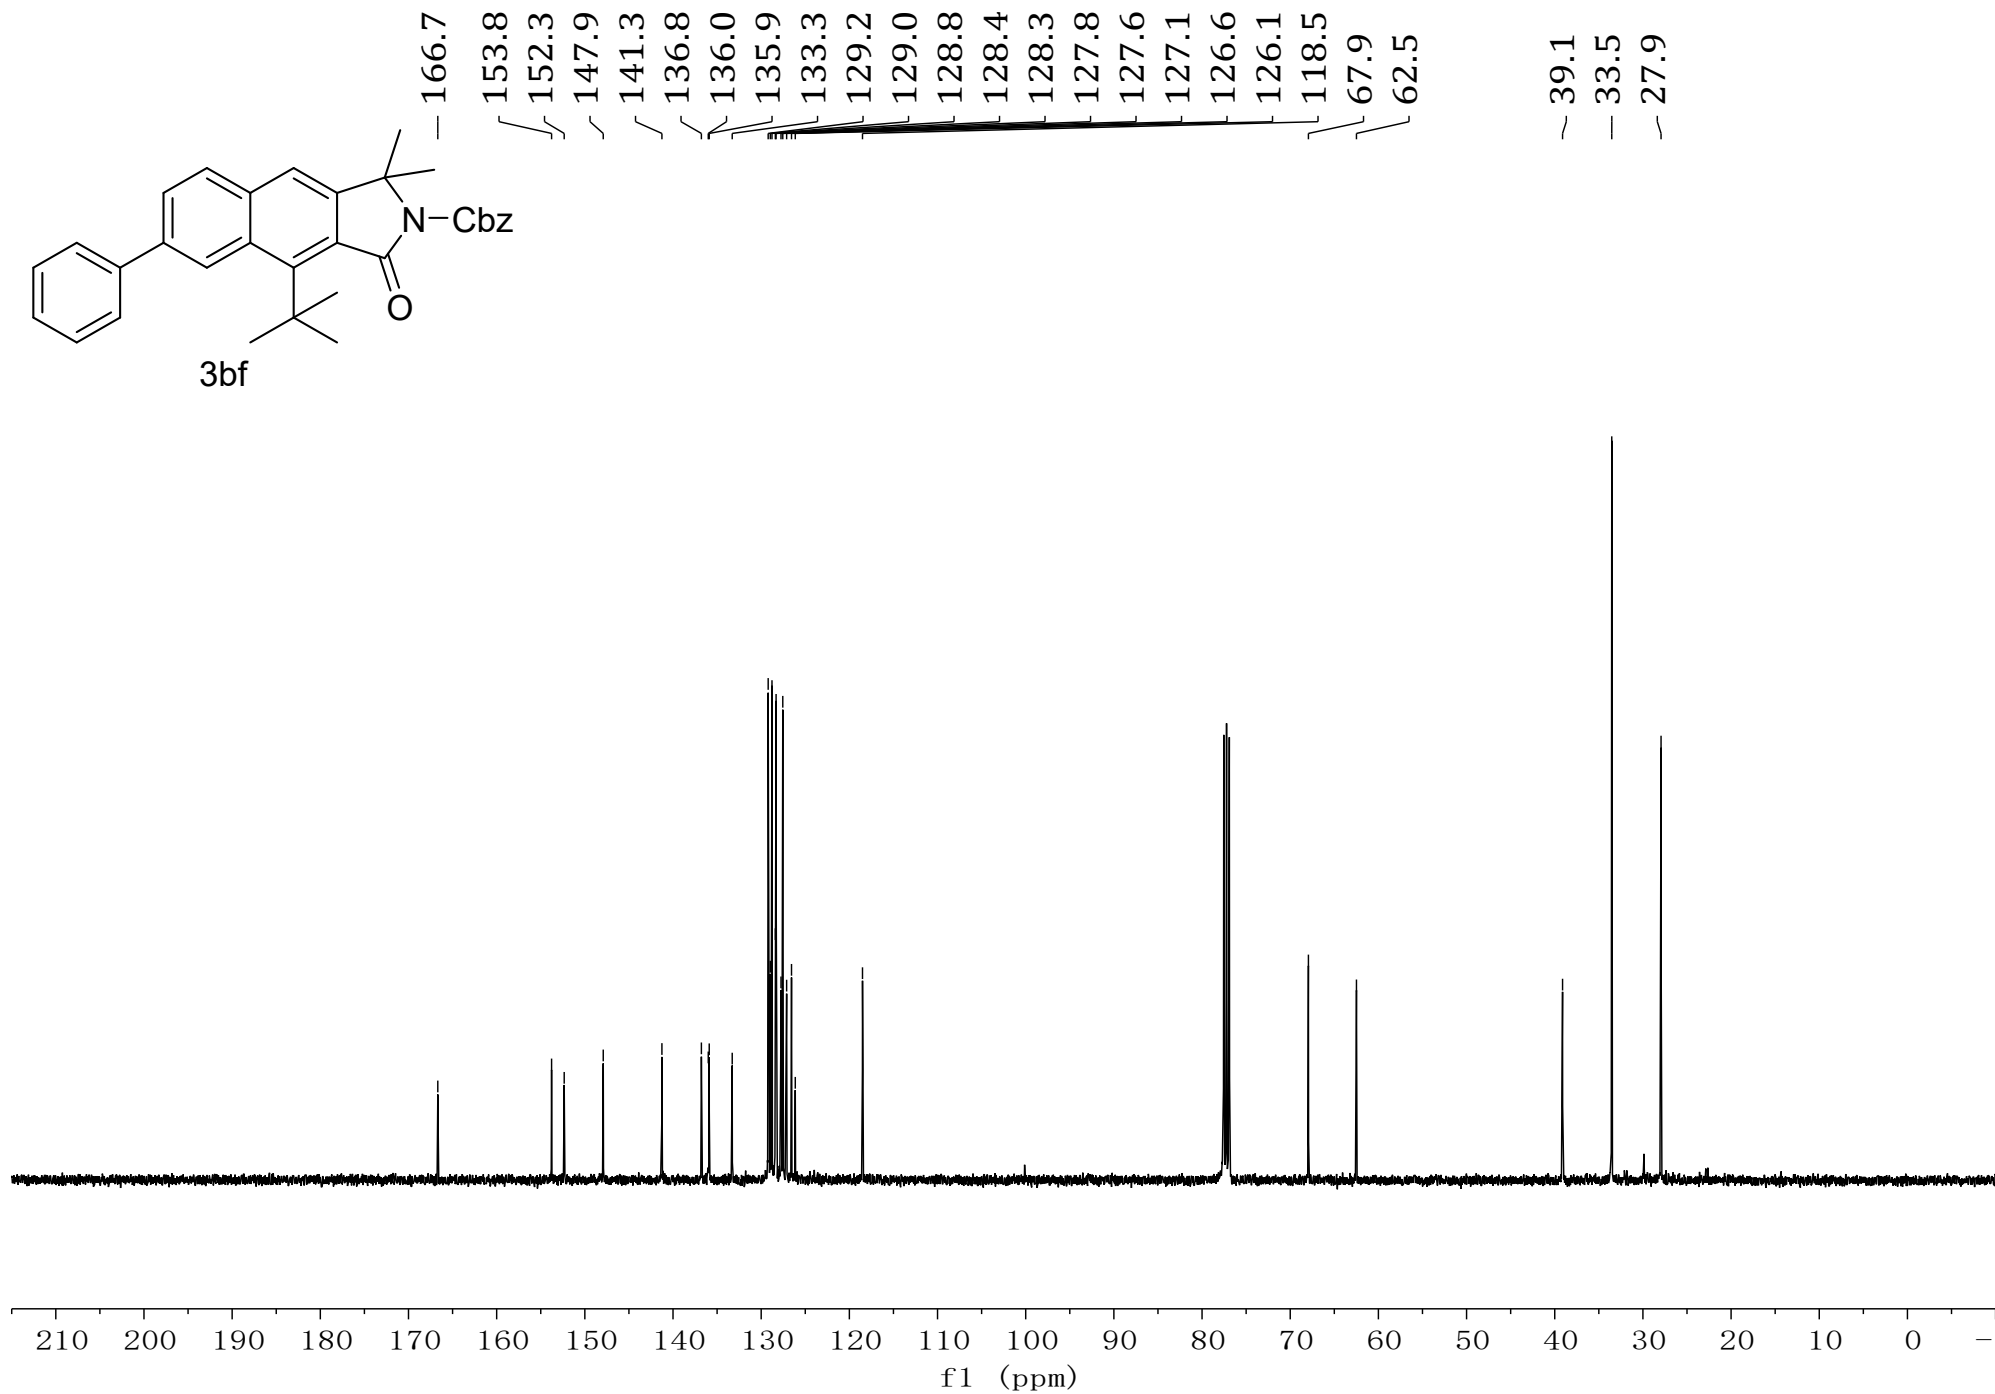

$^{13}\text{C}$  NMR (100 MHz,  $\text{CDCl}_3$ ) spectra of **3bf**.

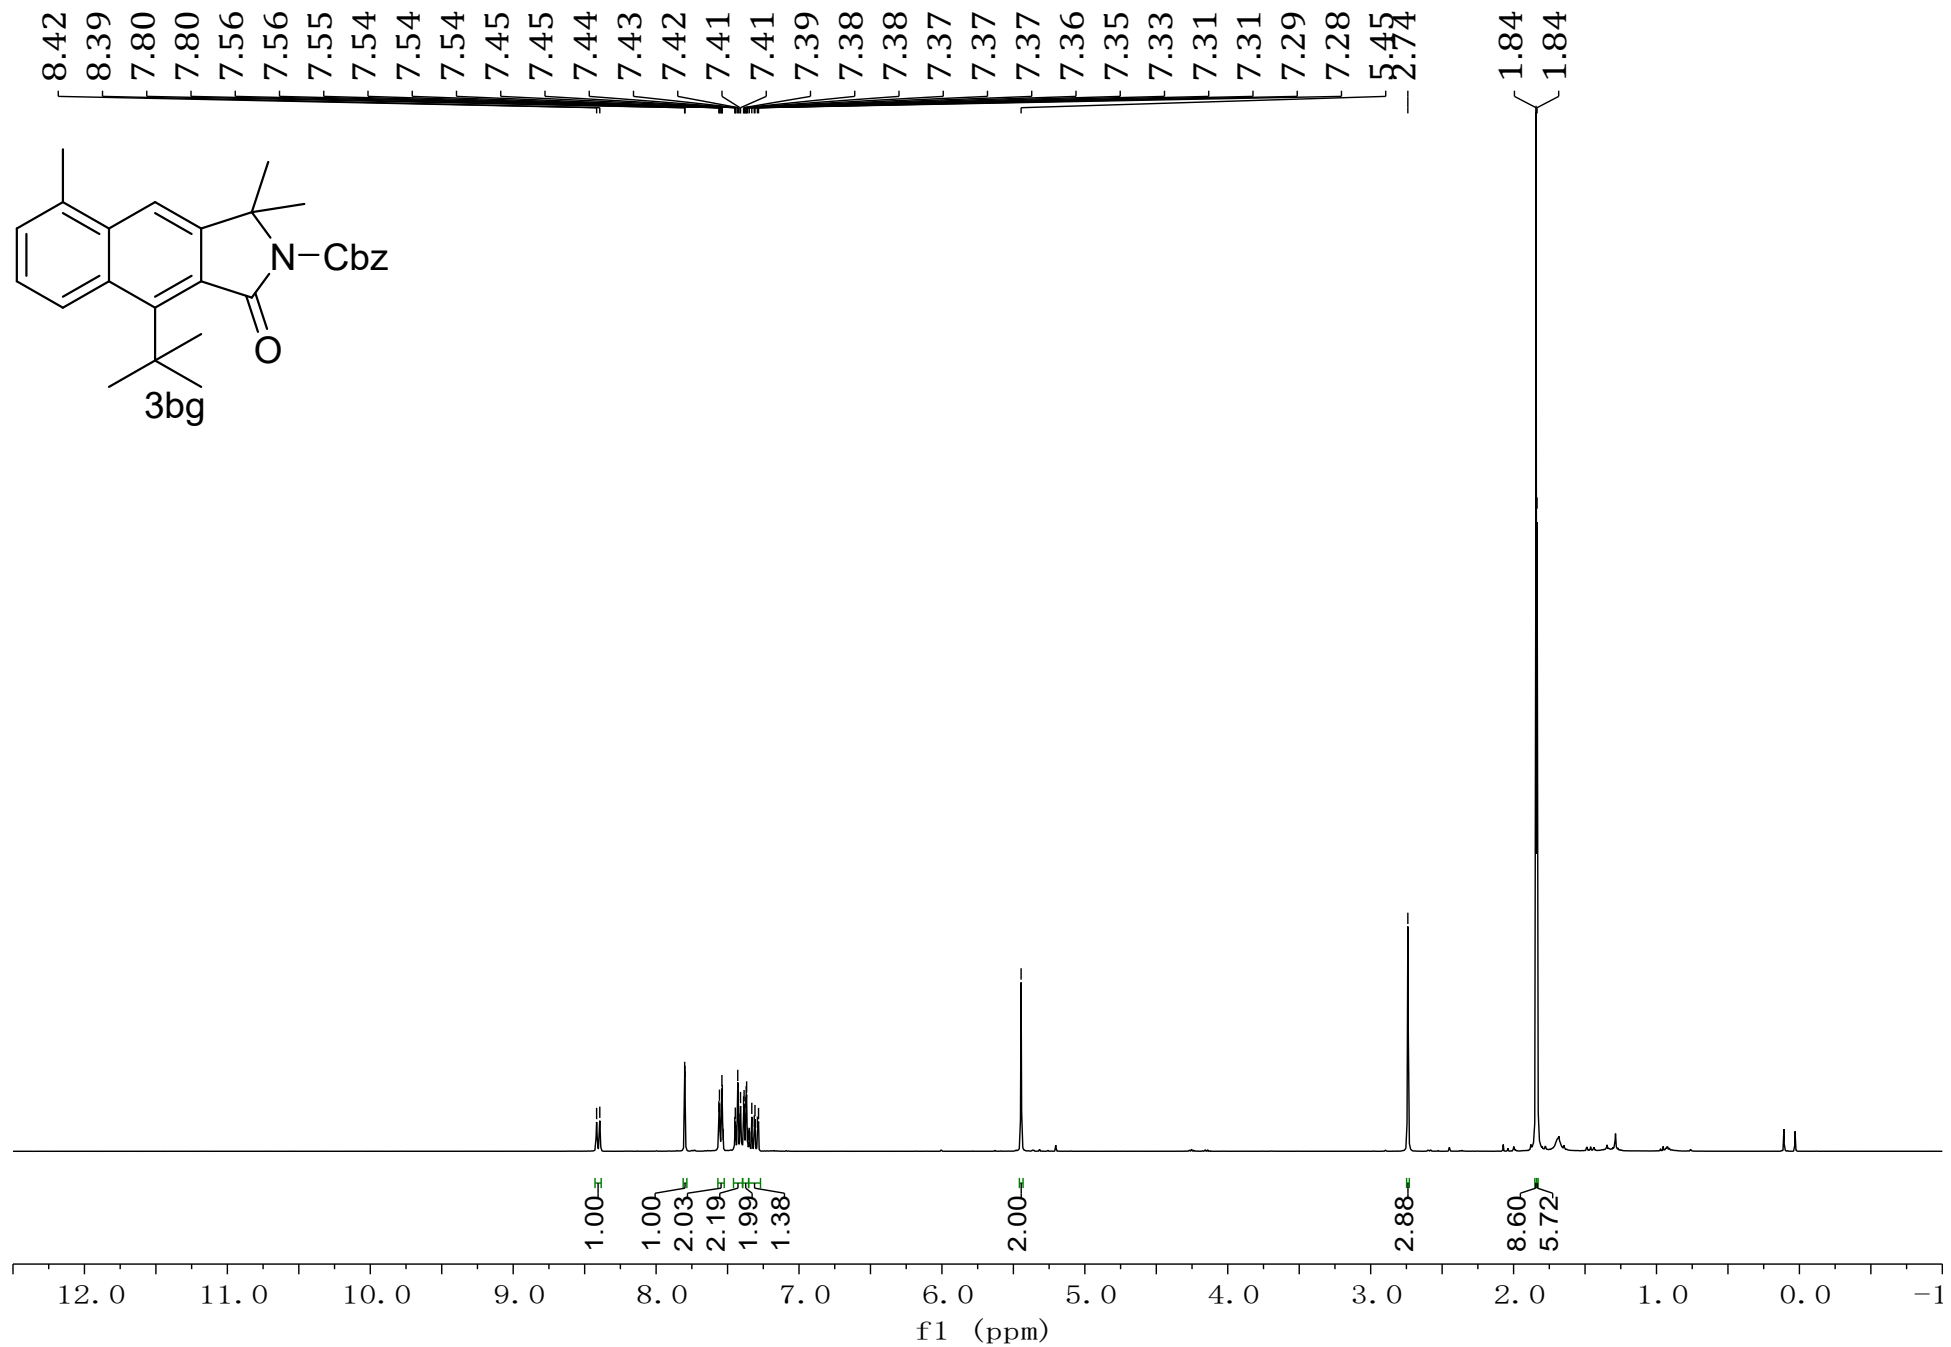

<sup>1</sup>H NMR (400 MHz, CDCl<sub>3</sub>) spectra of **3bg**.

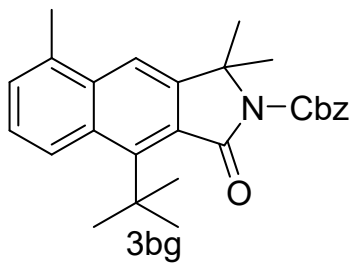

— 166.6  
/ 153.9  
/ 152.2  
/ 147.5  
/ 135.9  
/ 135.8  
/ 133.8  
/ 133.1  
/ 128.6  
/ 128.2  
/ 128.1  
/ 127.9  
/ 126.5  
/ 125.2  
/ 123.2  
/ 114.3

— 67.7  
— 62.6

~ 38.9  
~ 33.2  
~ 28.0  
/ 20.4

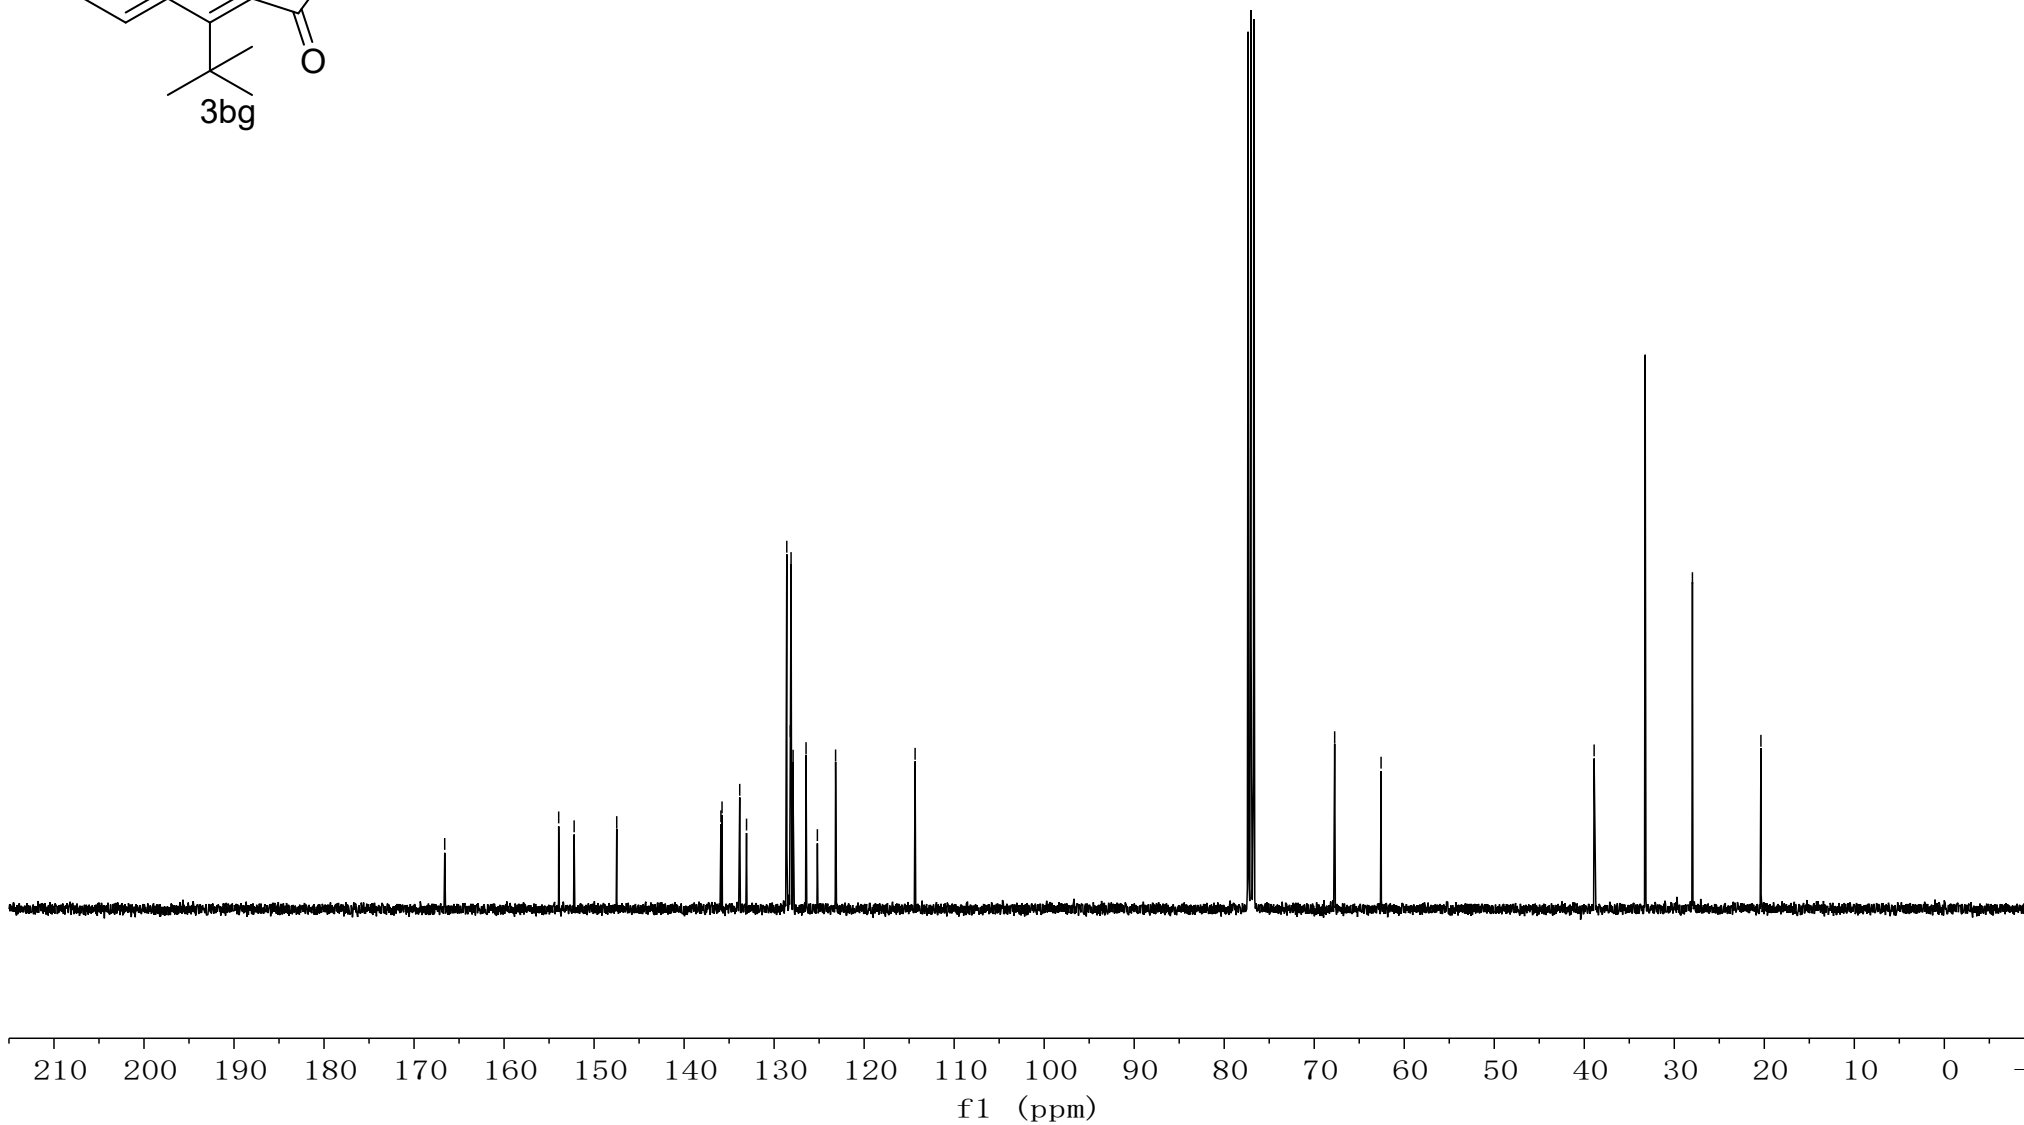

<sup>13</sup>C NMR (100 MHz, CDCl<sub>3</sub>) spectra of **3bg**.



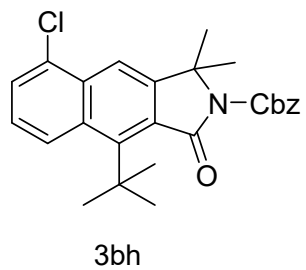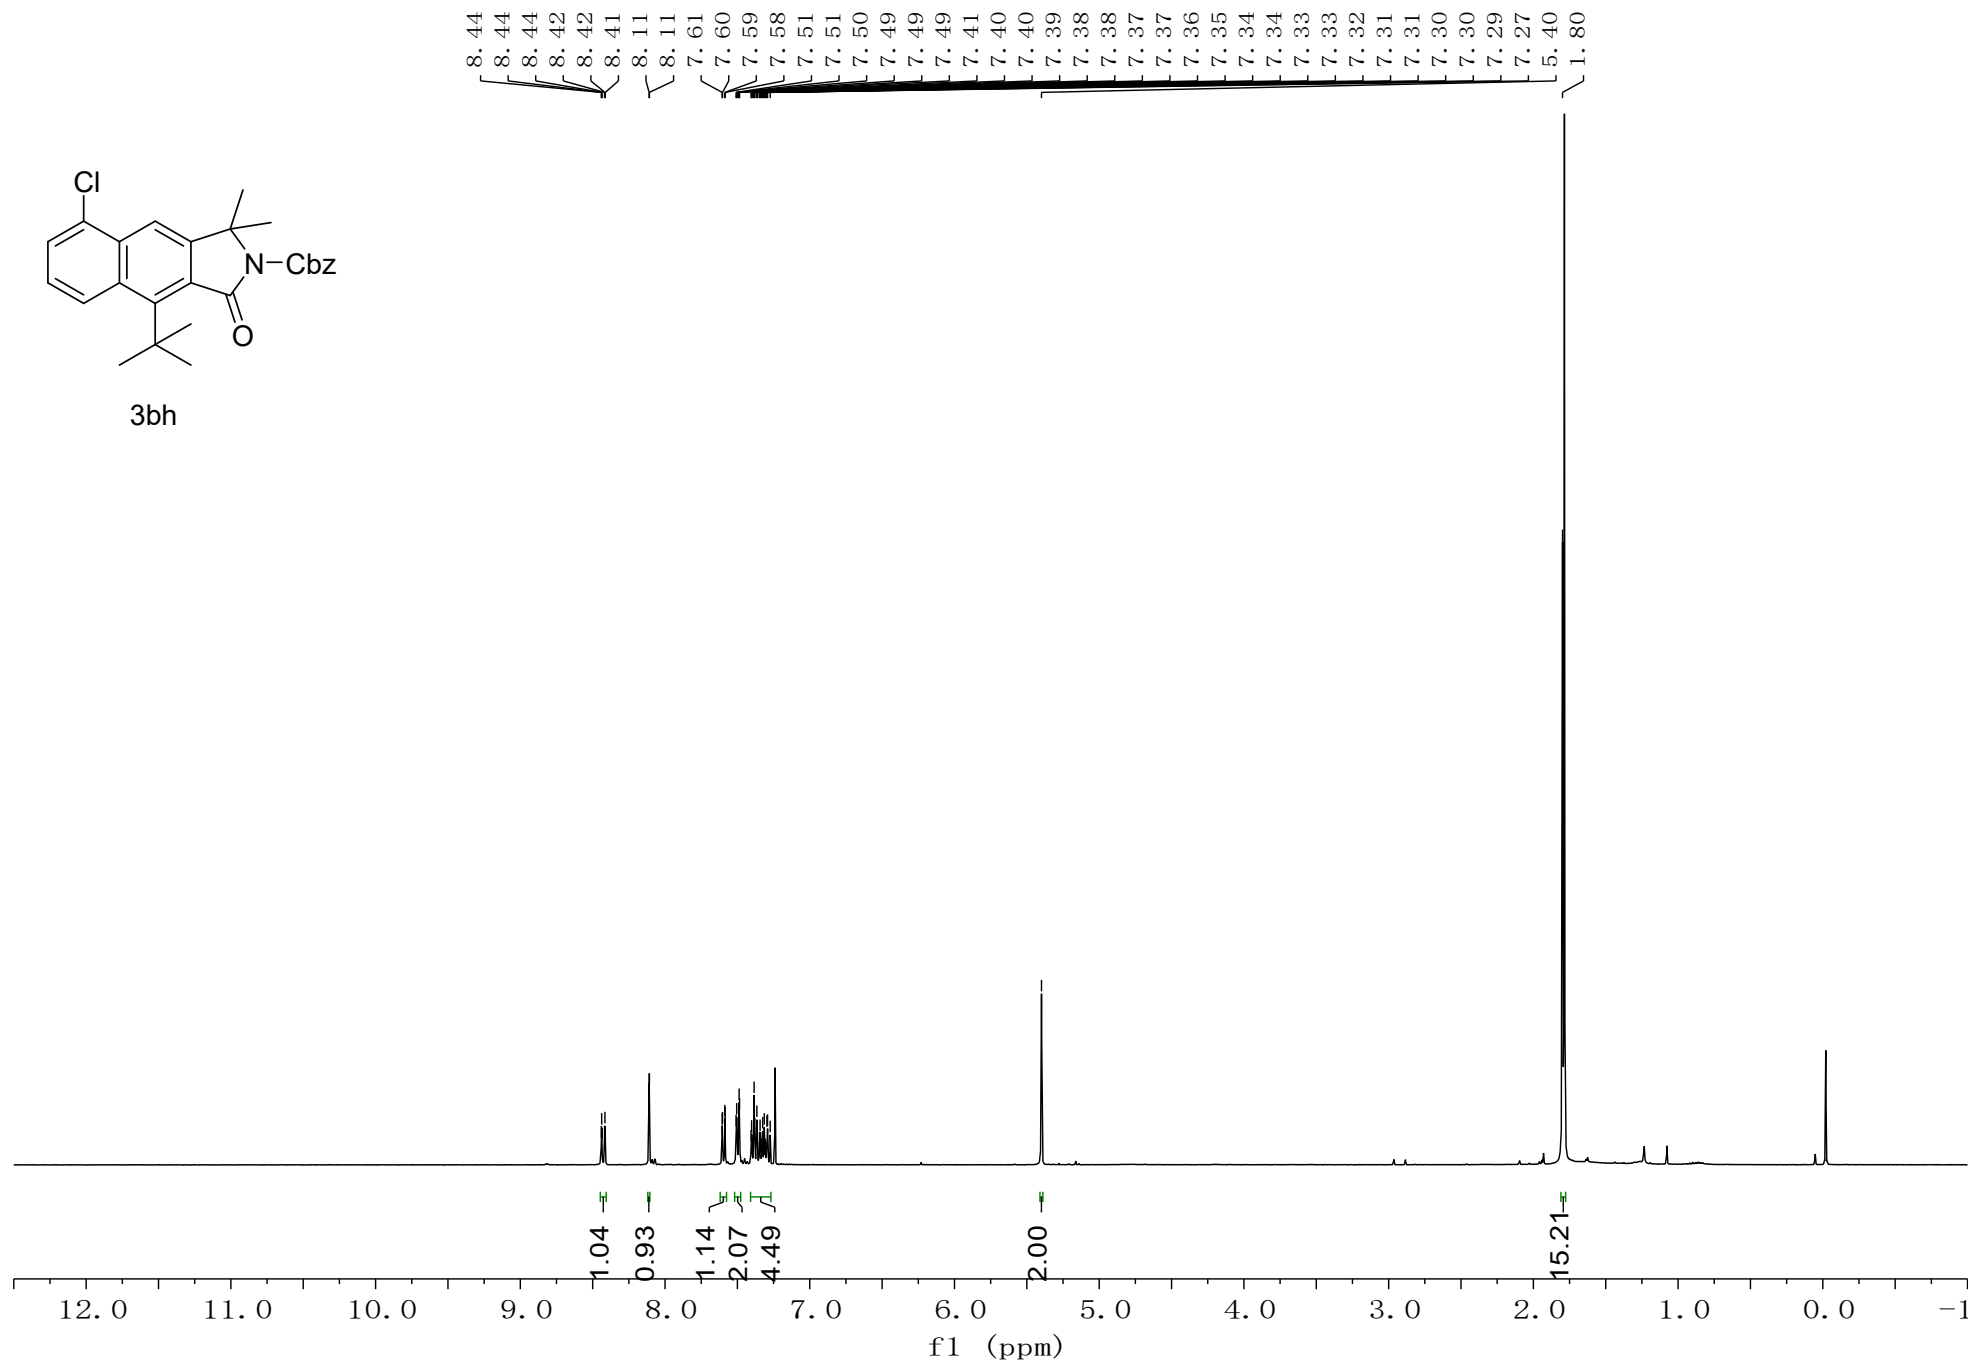

$^1\text{H}$  NMR (400 MHz,  $\text{CDCl}_3$ ) spectra of **3bh**.

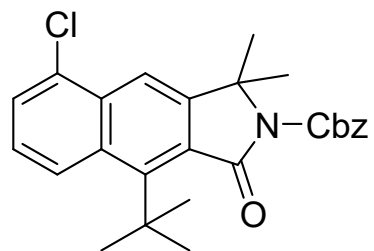

**3bh**

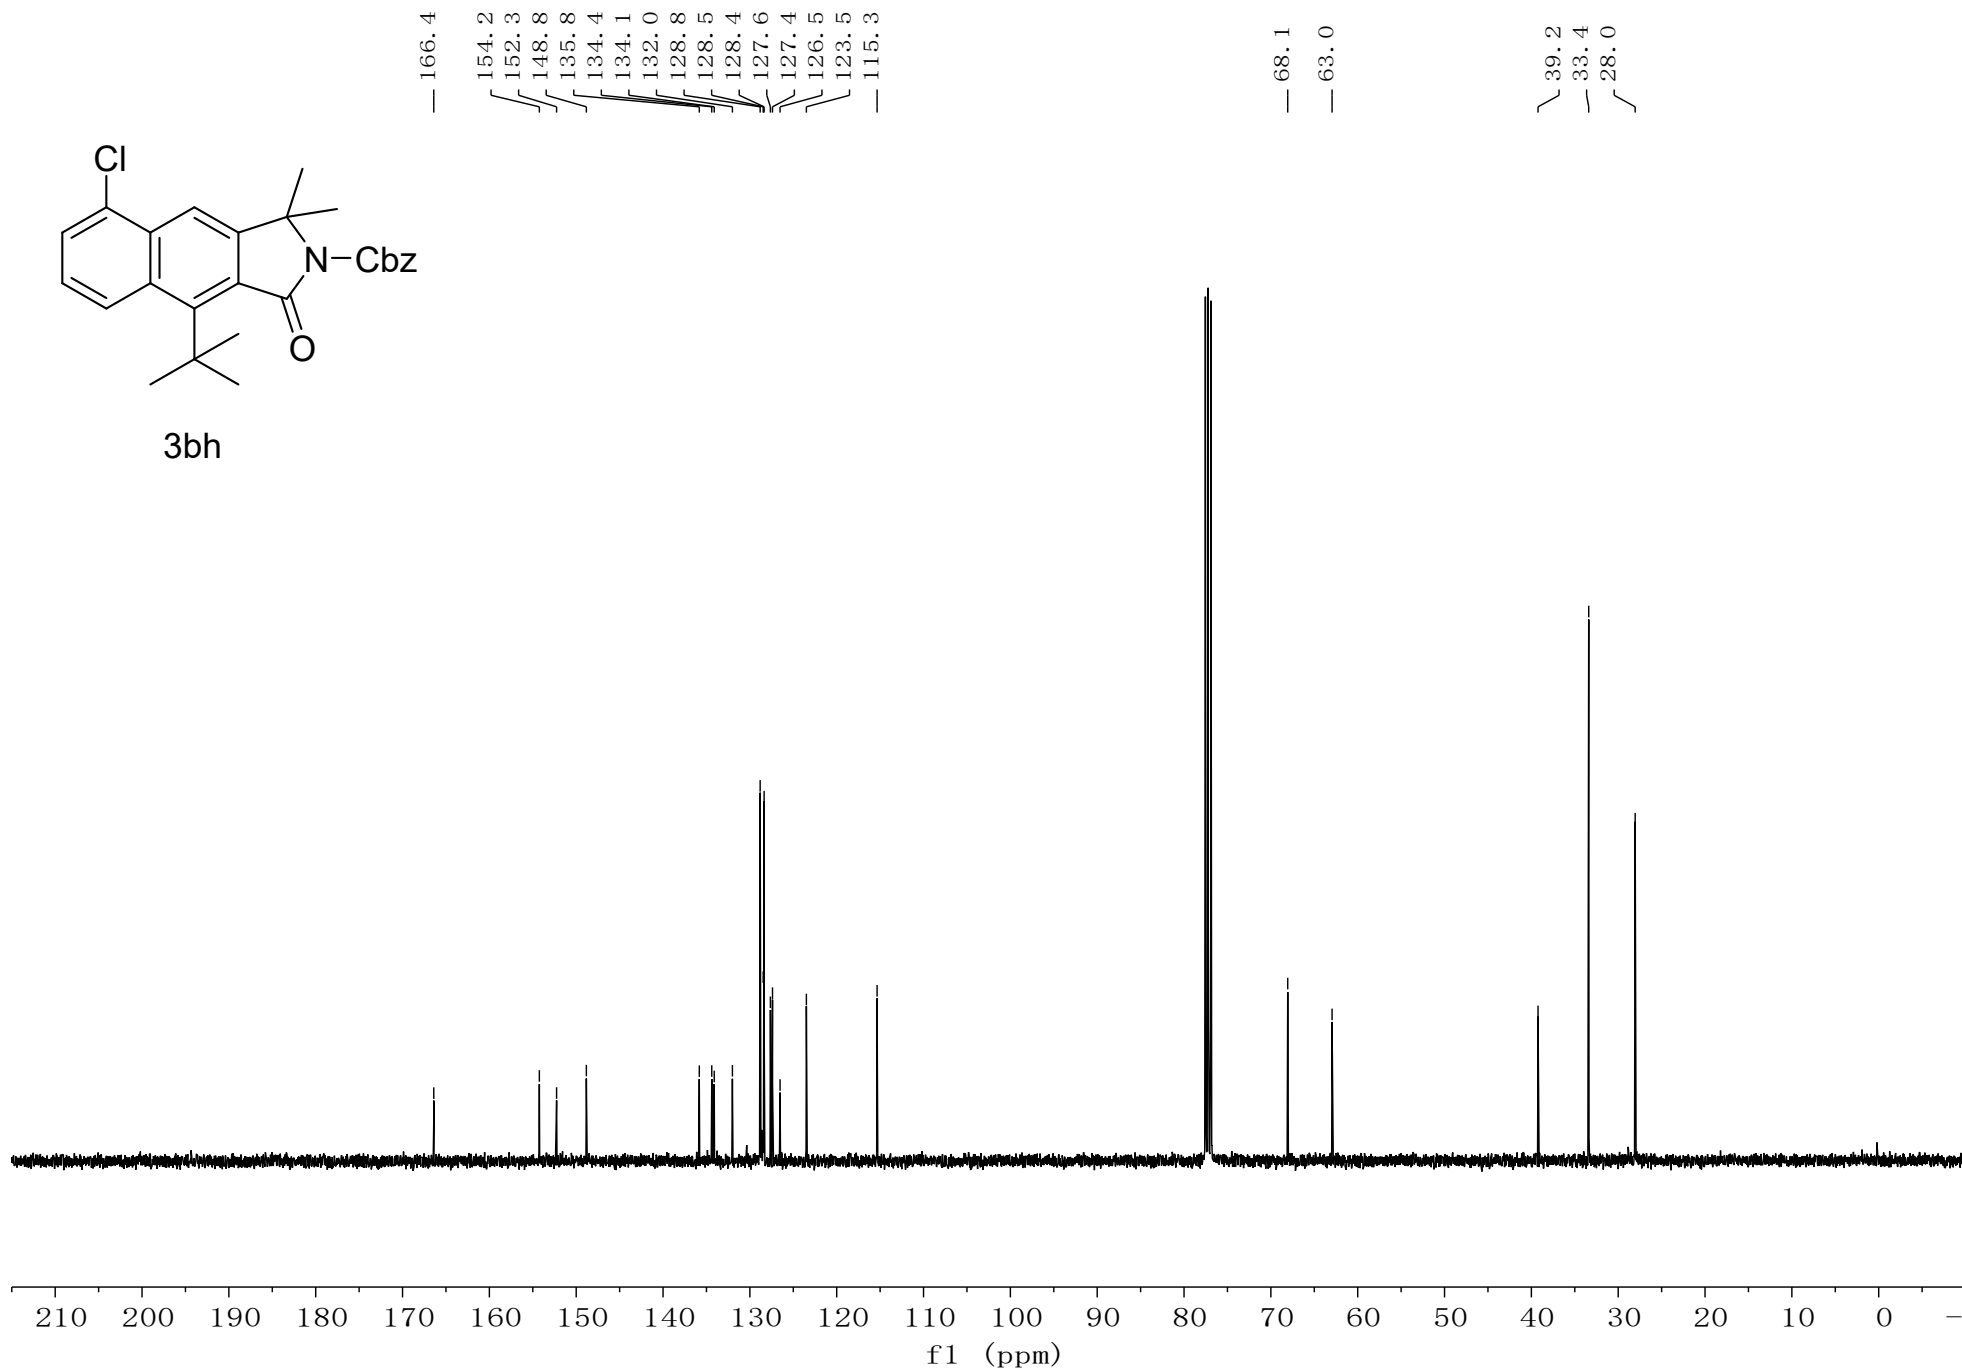

<sup>13</sup>C NMR (100 MHz, CDCl<sub>3</sub>) spectra of **3bh**.

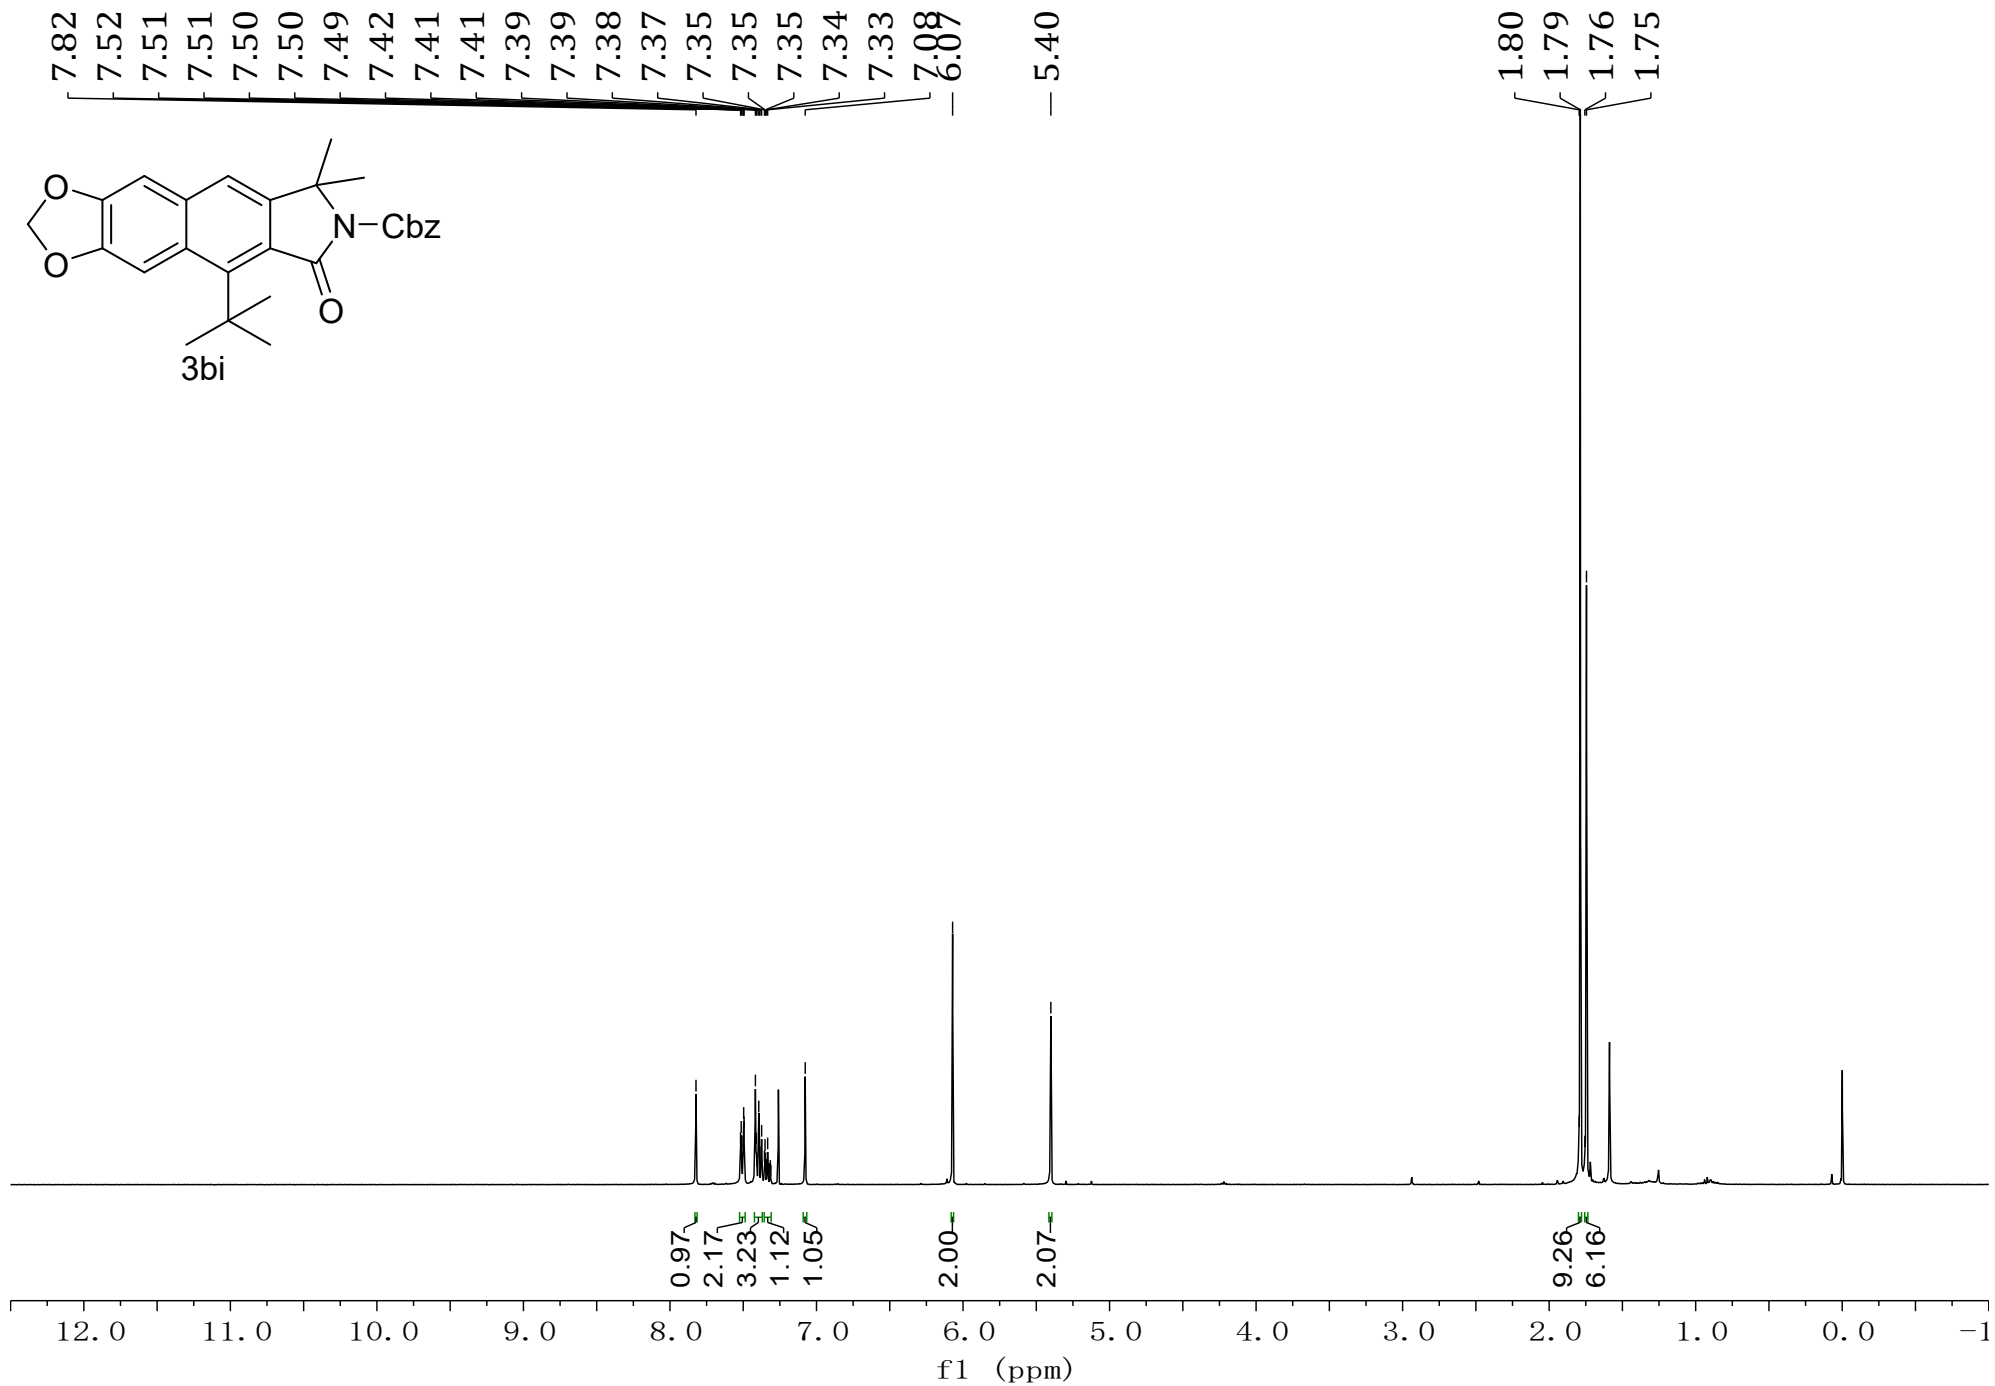

$^1\text{H NMR}$  (400 MHz,  $\text{CDCl}_3$ ) spectra of **3bi**.

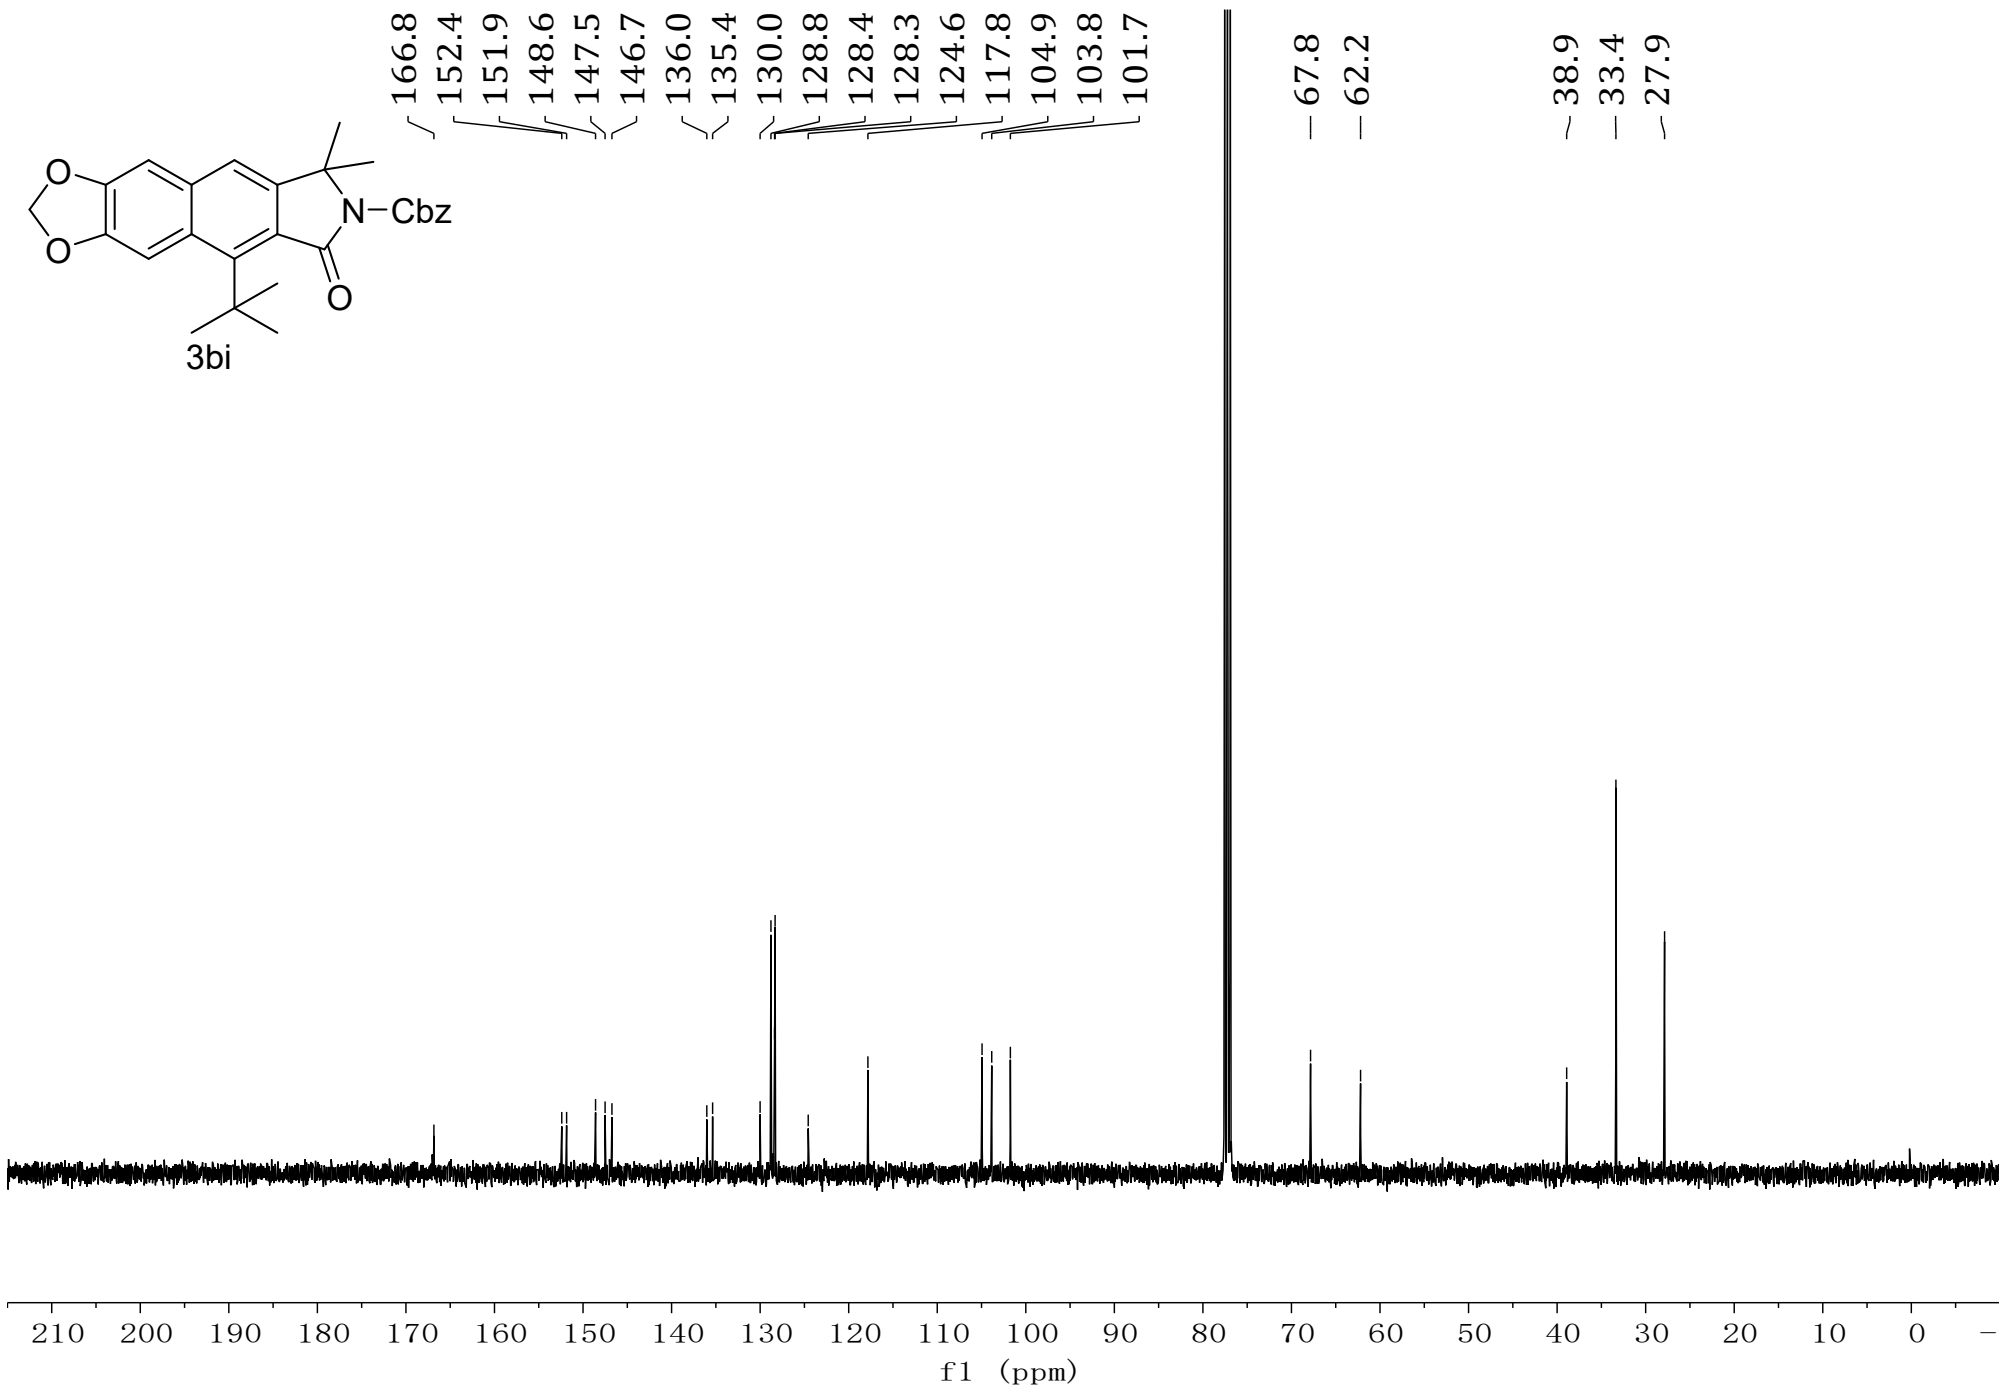

<sup>13</sup>C NMR (100 MHz, CDCl<sub>3</sub>) spectra of **3bi**.

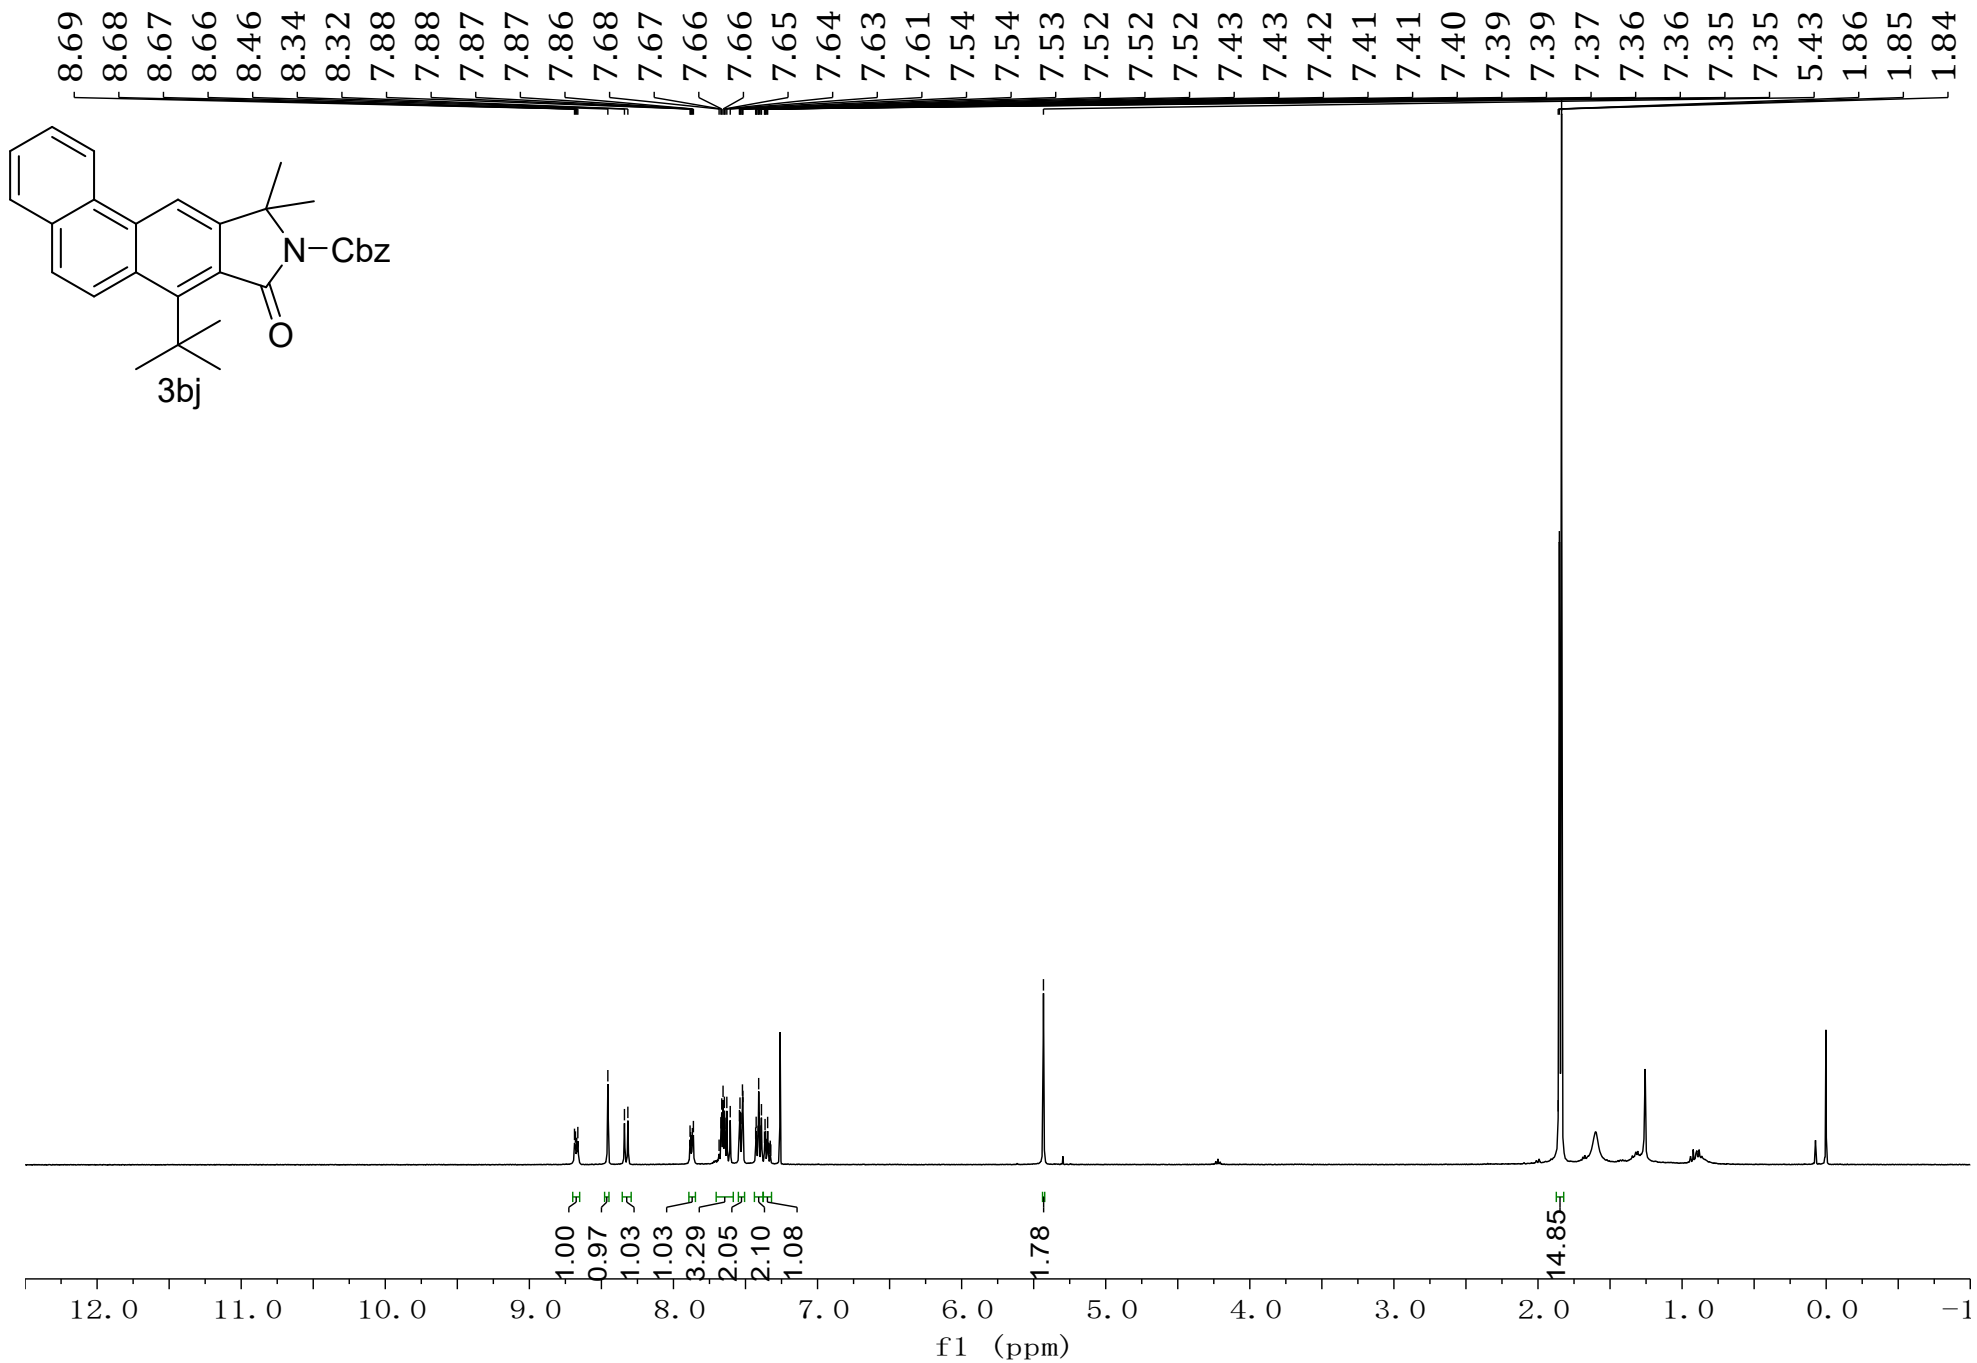

$^1\text{H NMR}$  (400 MHz,  $\text{CDCl}_3$ ) spectra of **3bj**.

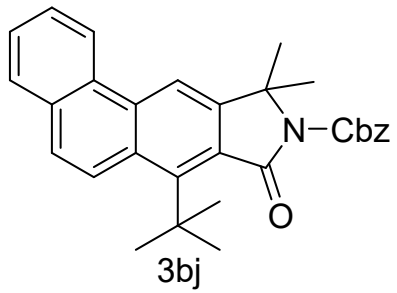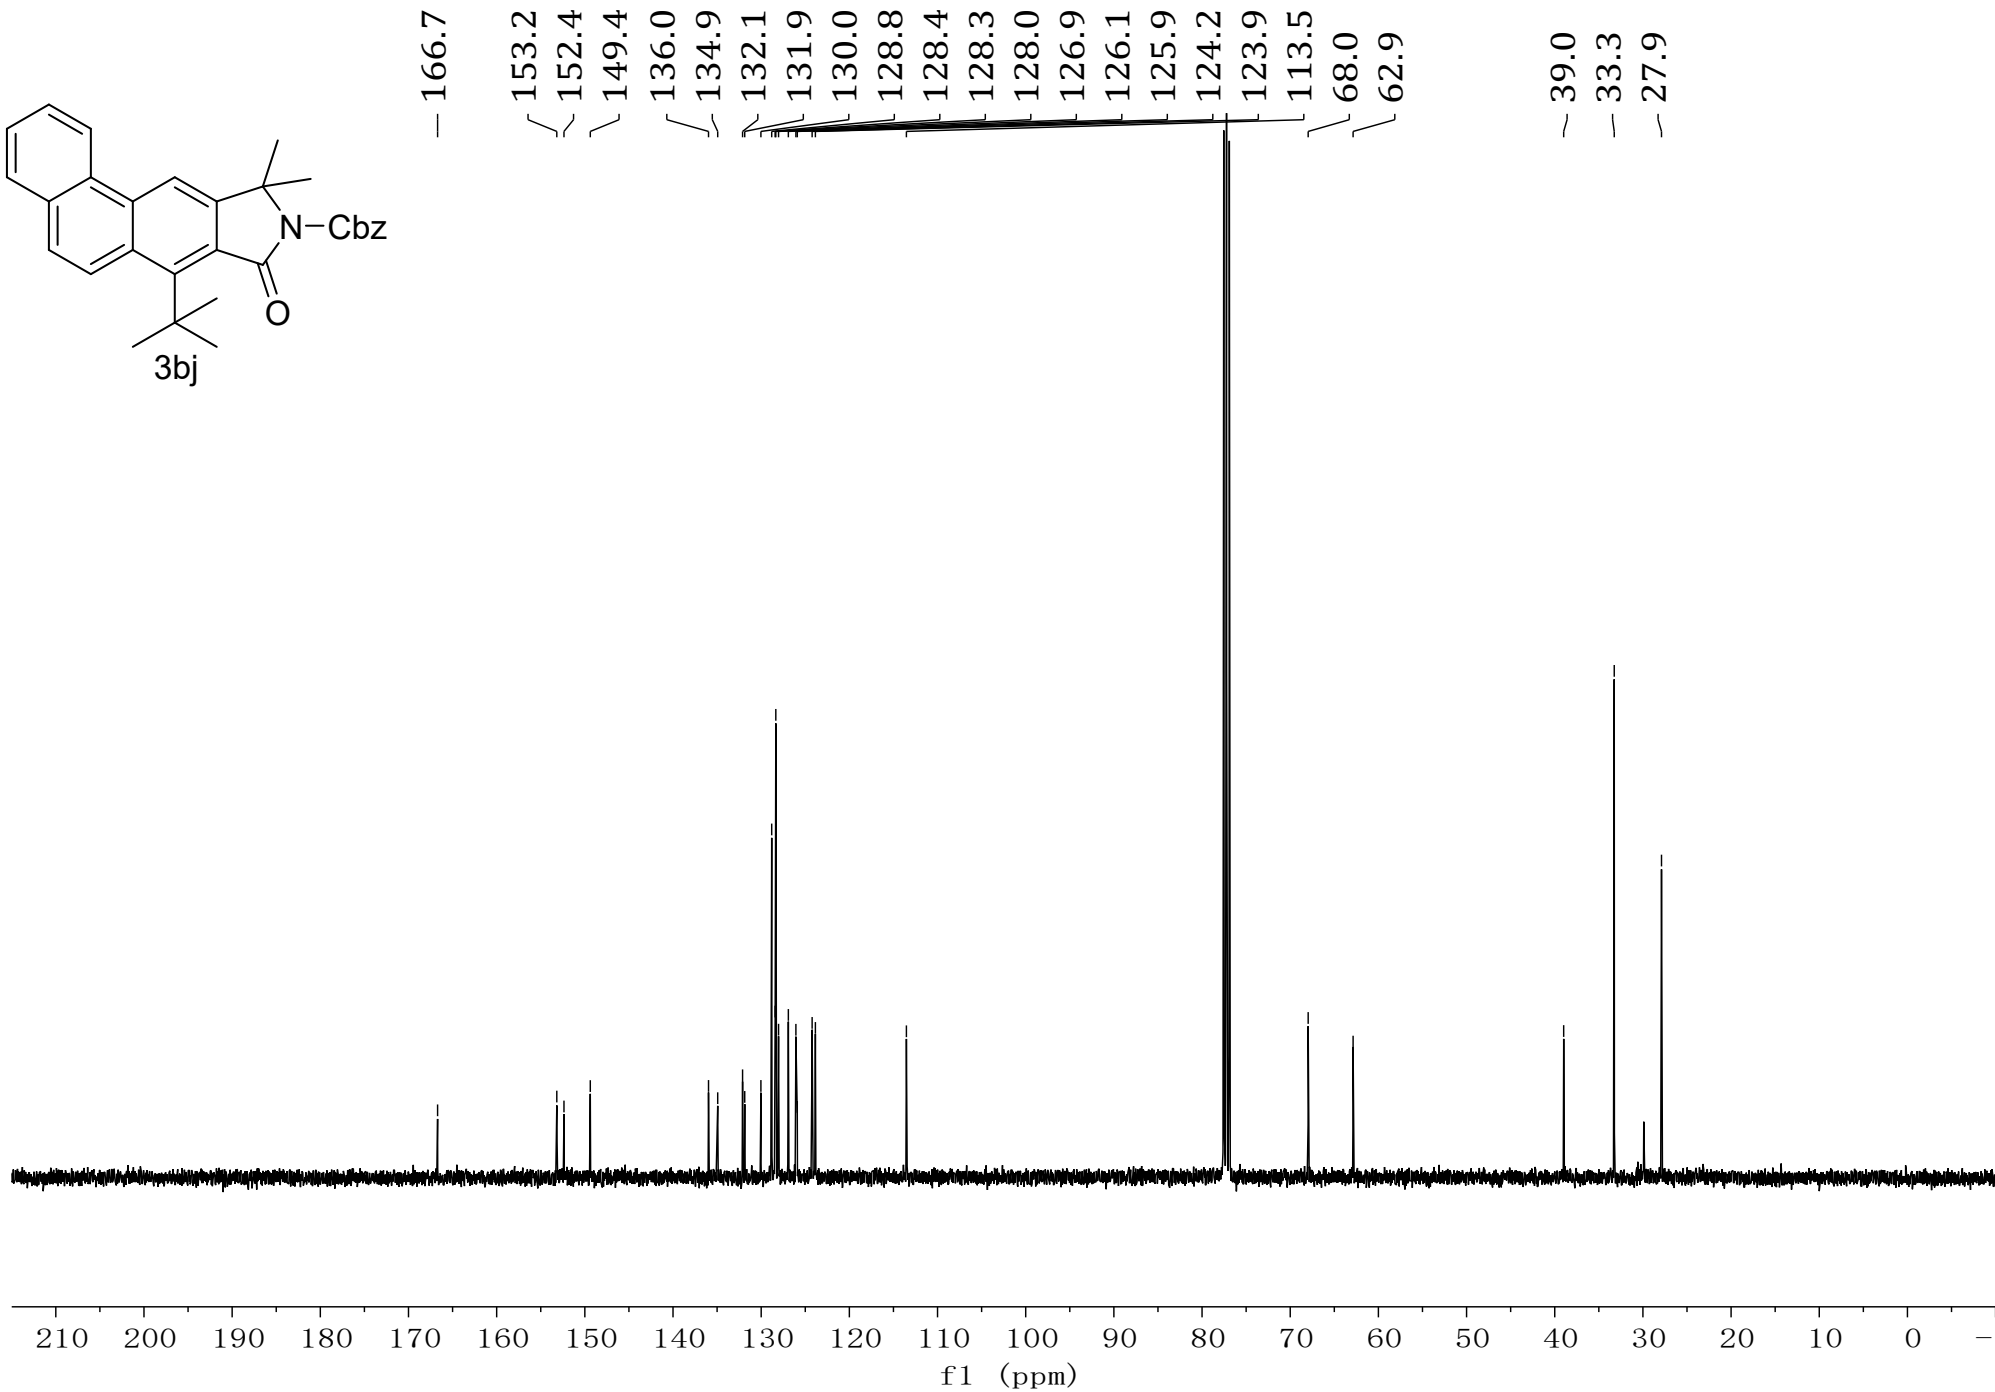

<sup>13</sup>C NMR (100 MHz, CDCl<sub>3</sub>) spectra of **3bj**.

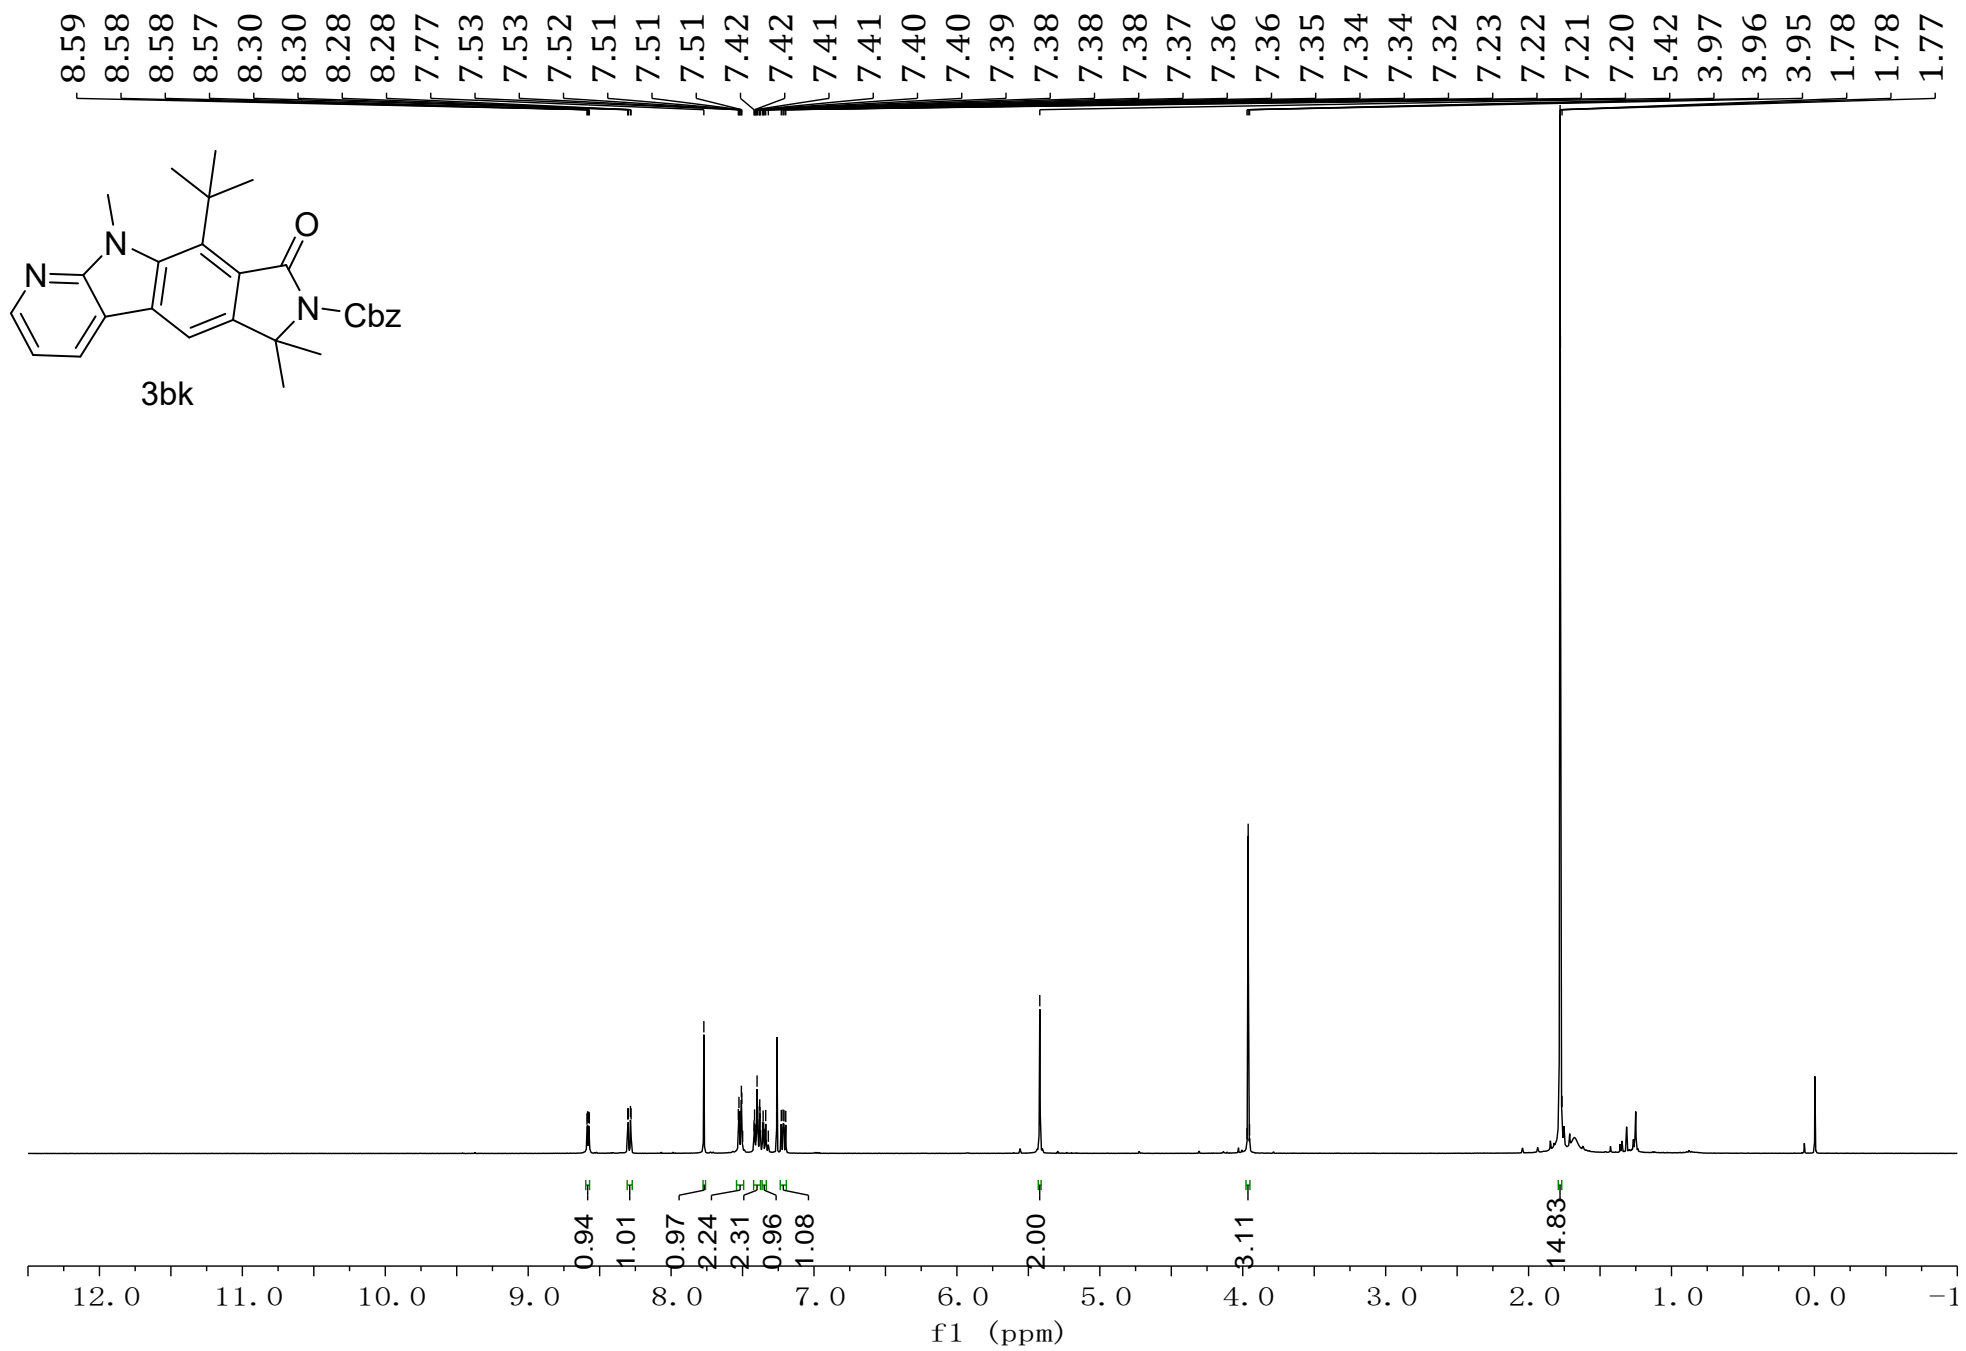

$^1\text{H NMR}$  (400 MHz,  $\text{CDCl}_3$ ) spectra of **3bk**.

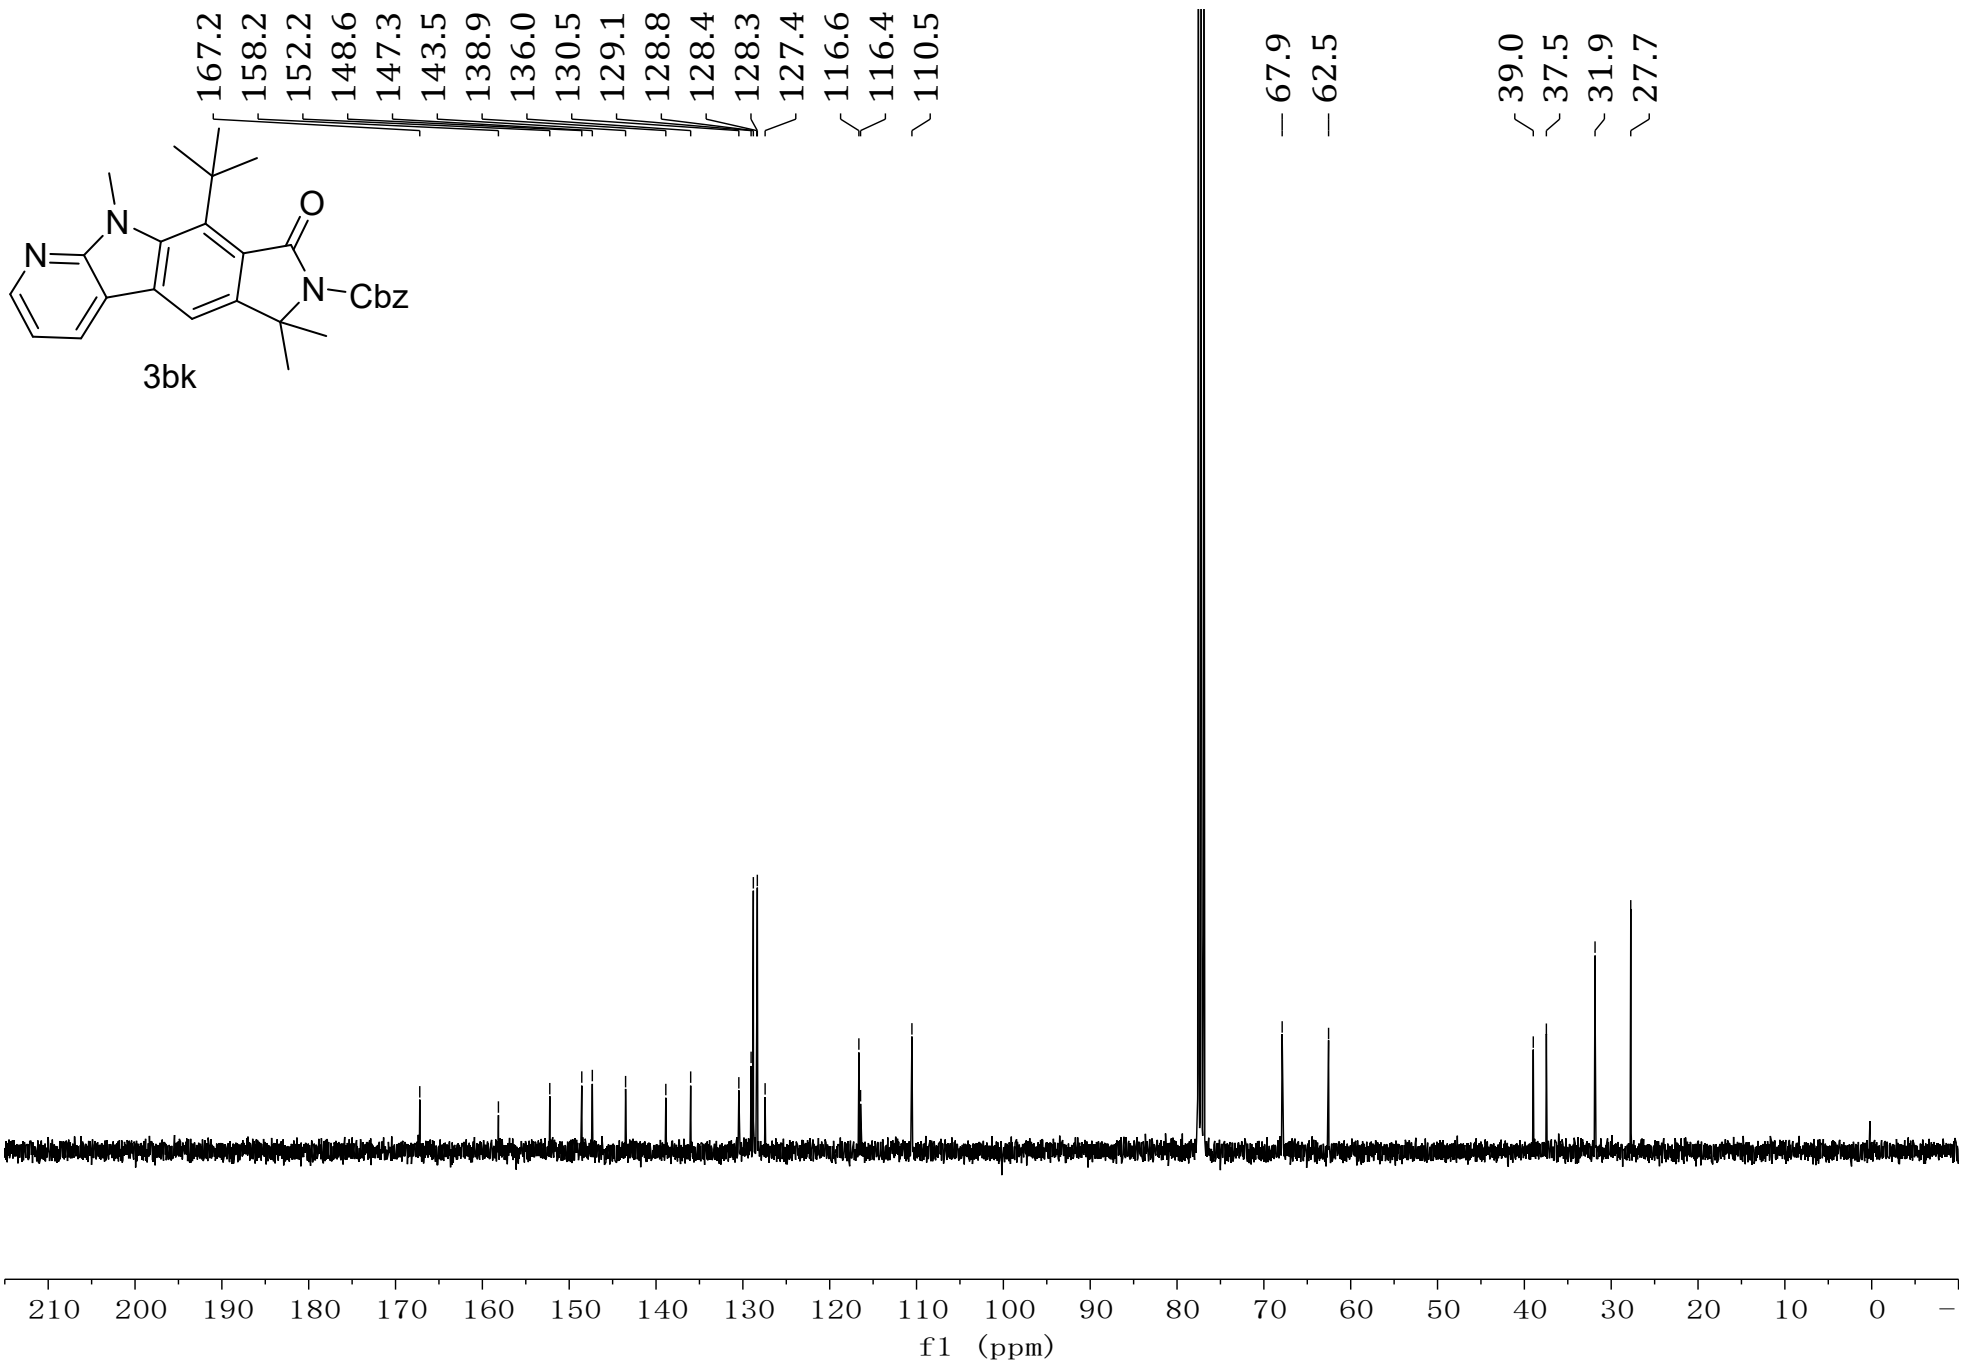

<sup>13</sup>C NMR (100 MHz, CDCl<sub>3</sub>) spectra of **3bk**.



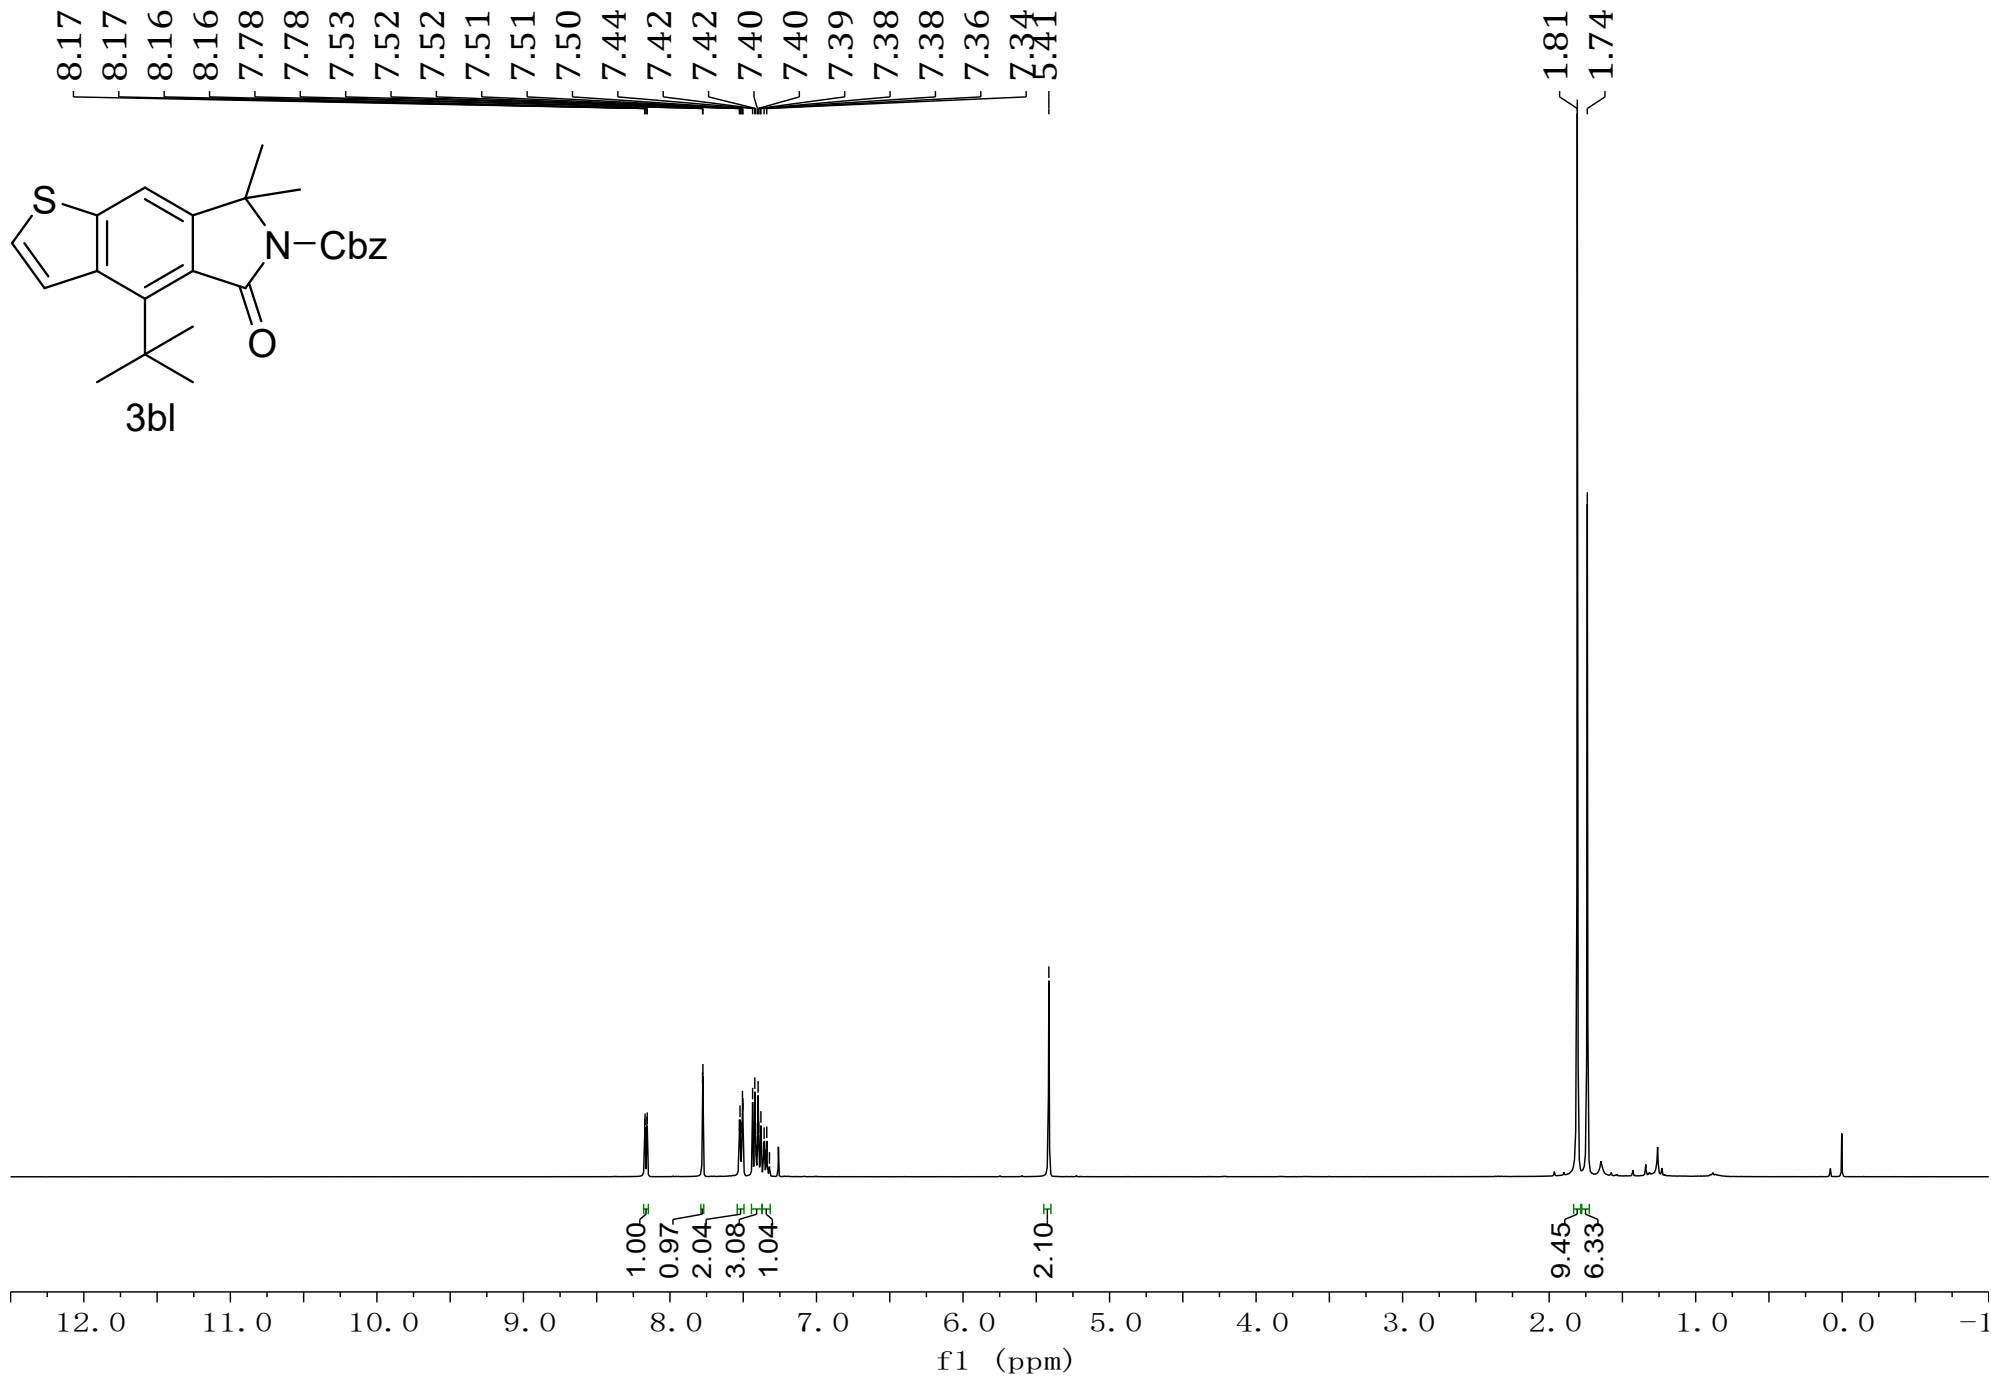

$^1\text{H NMR}$  (400 MHz,  $\text{CDCl}_3$ ) spectra of **3bl**.

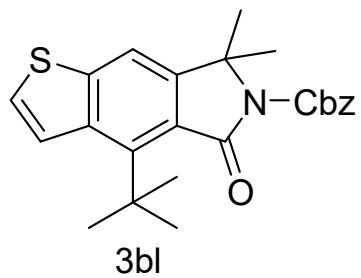

— 166.5  
— 152.3  
— 150.6  
— 150.5  
— 147.9  
— 137.9  
— 135.9  
— 128.8  
— 128.4  
— 126.5  
— 125.2  
— 123.5  
— 113.9

— 67.9

— 61.5

~ 39.4

— 33.4

~ 27.7

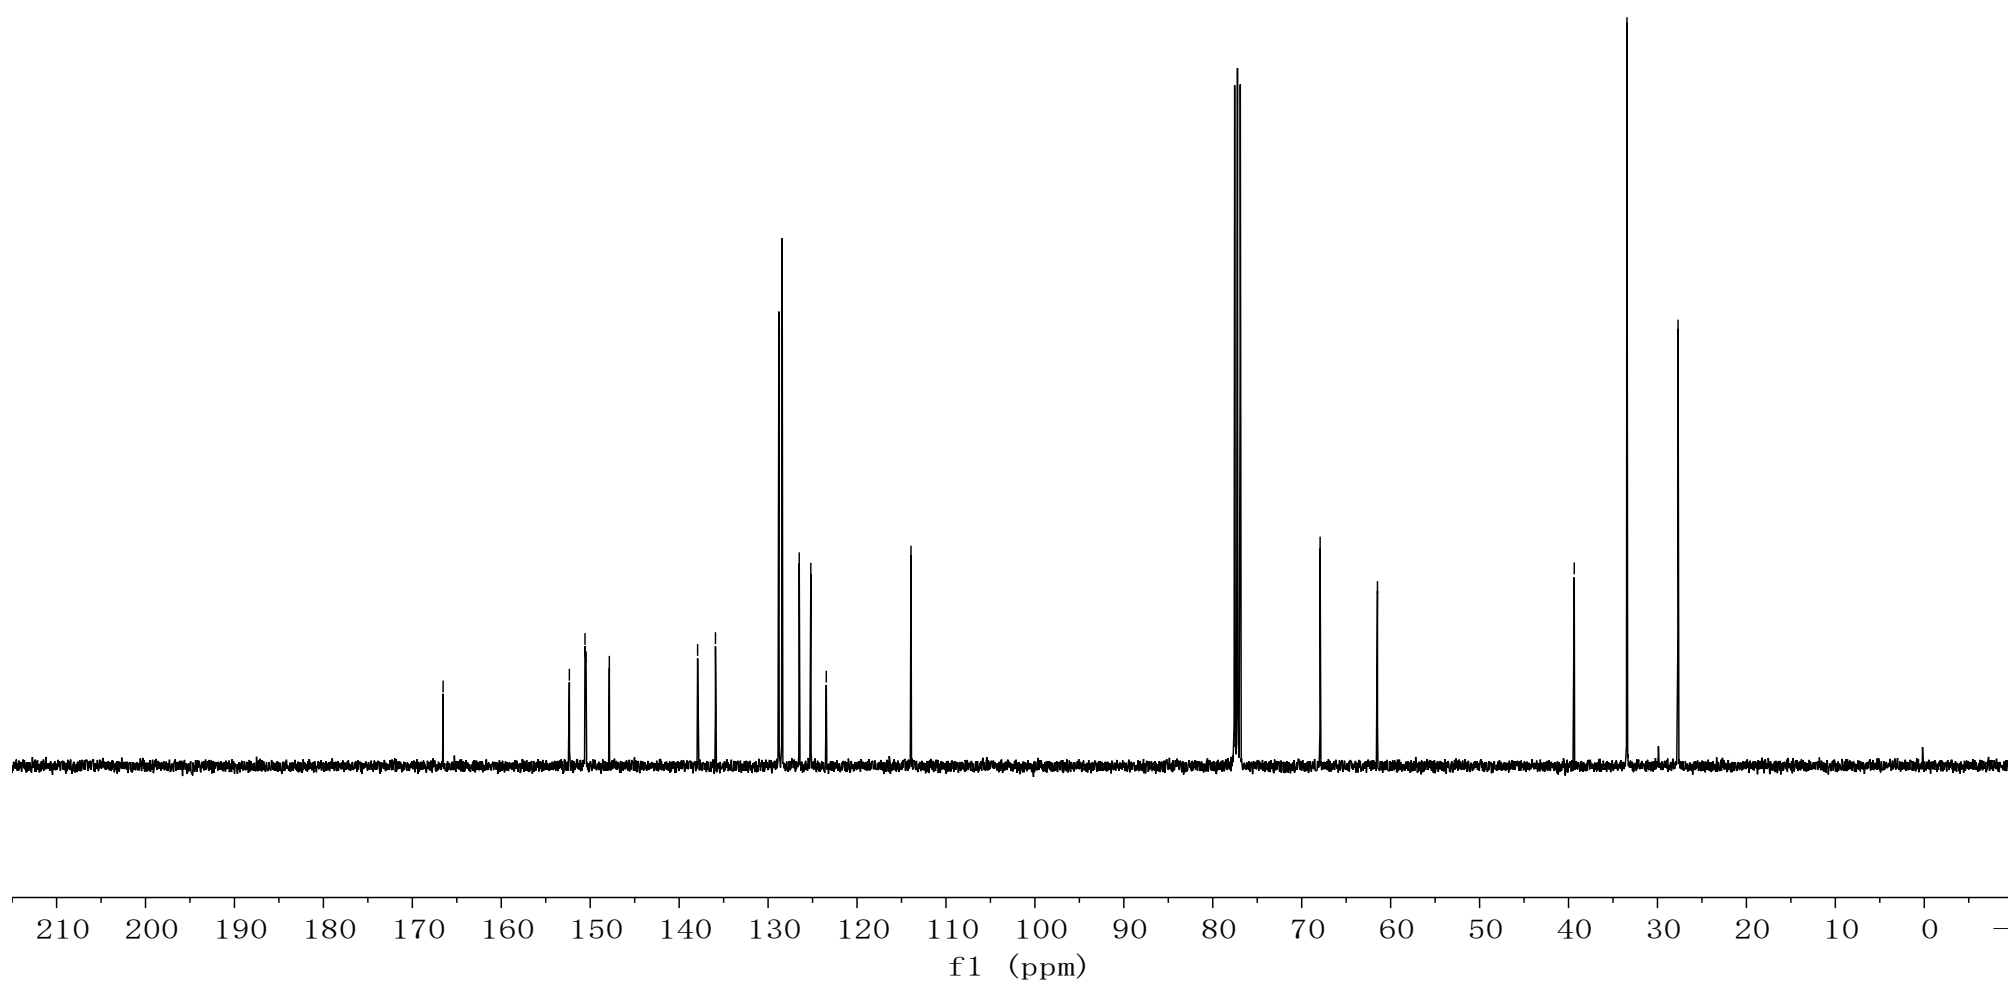

<sup>13</sup>C NMR (100 MHz, CDCl<sub>3</sub>) spectra of **3bl**.

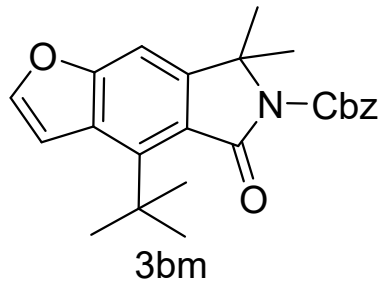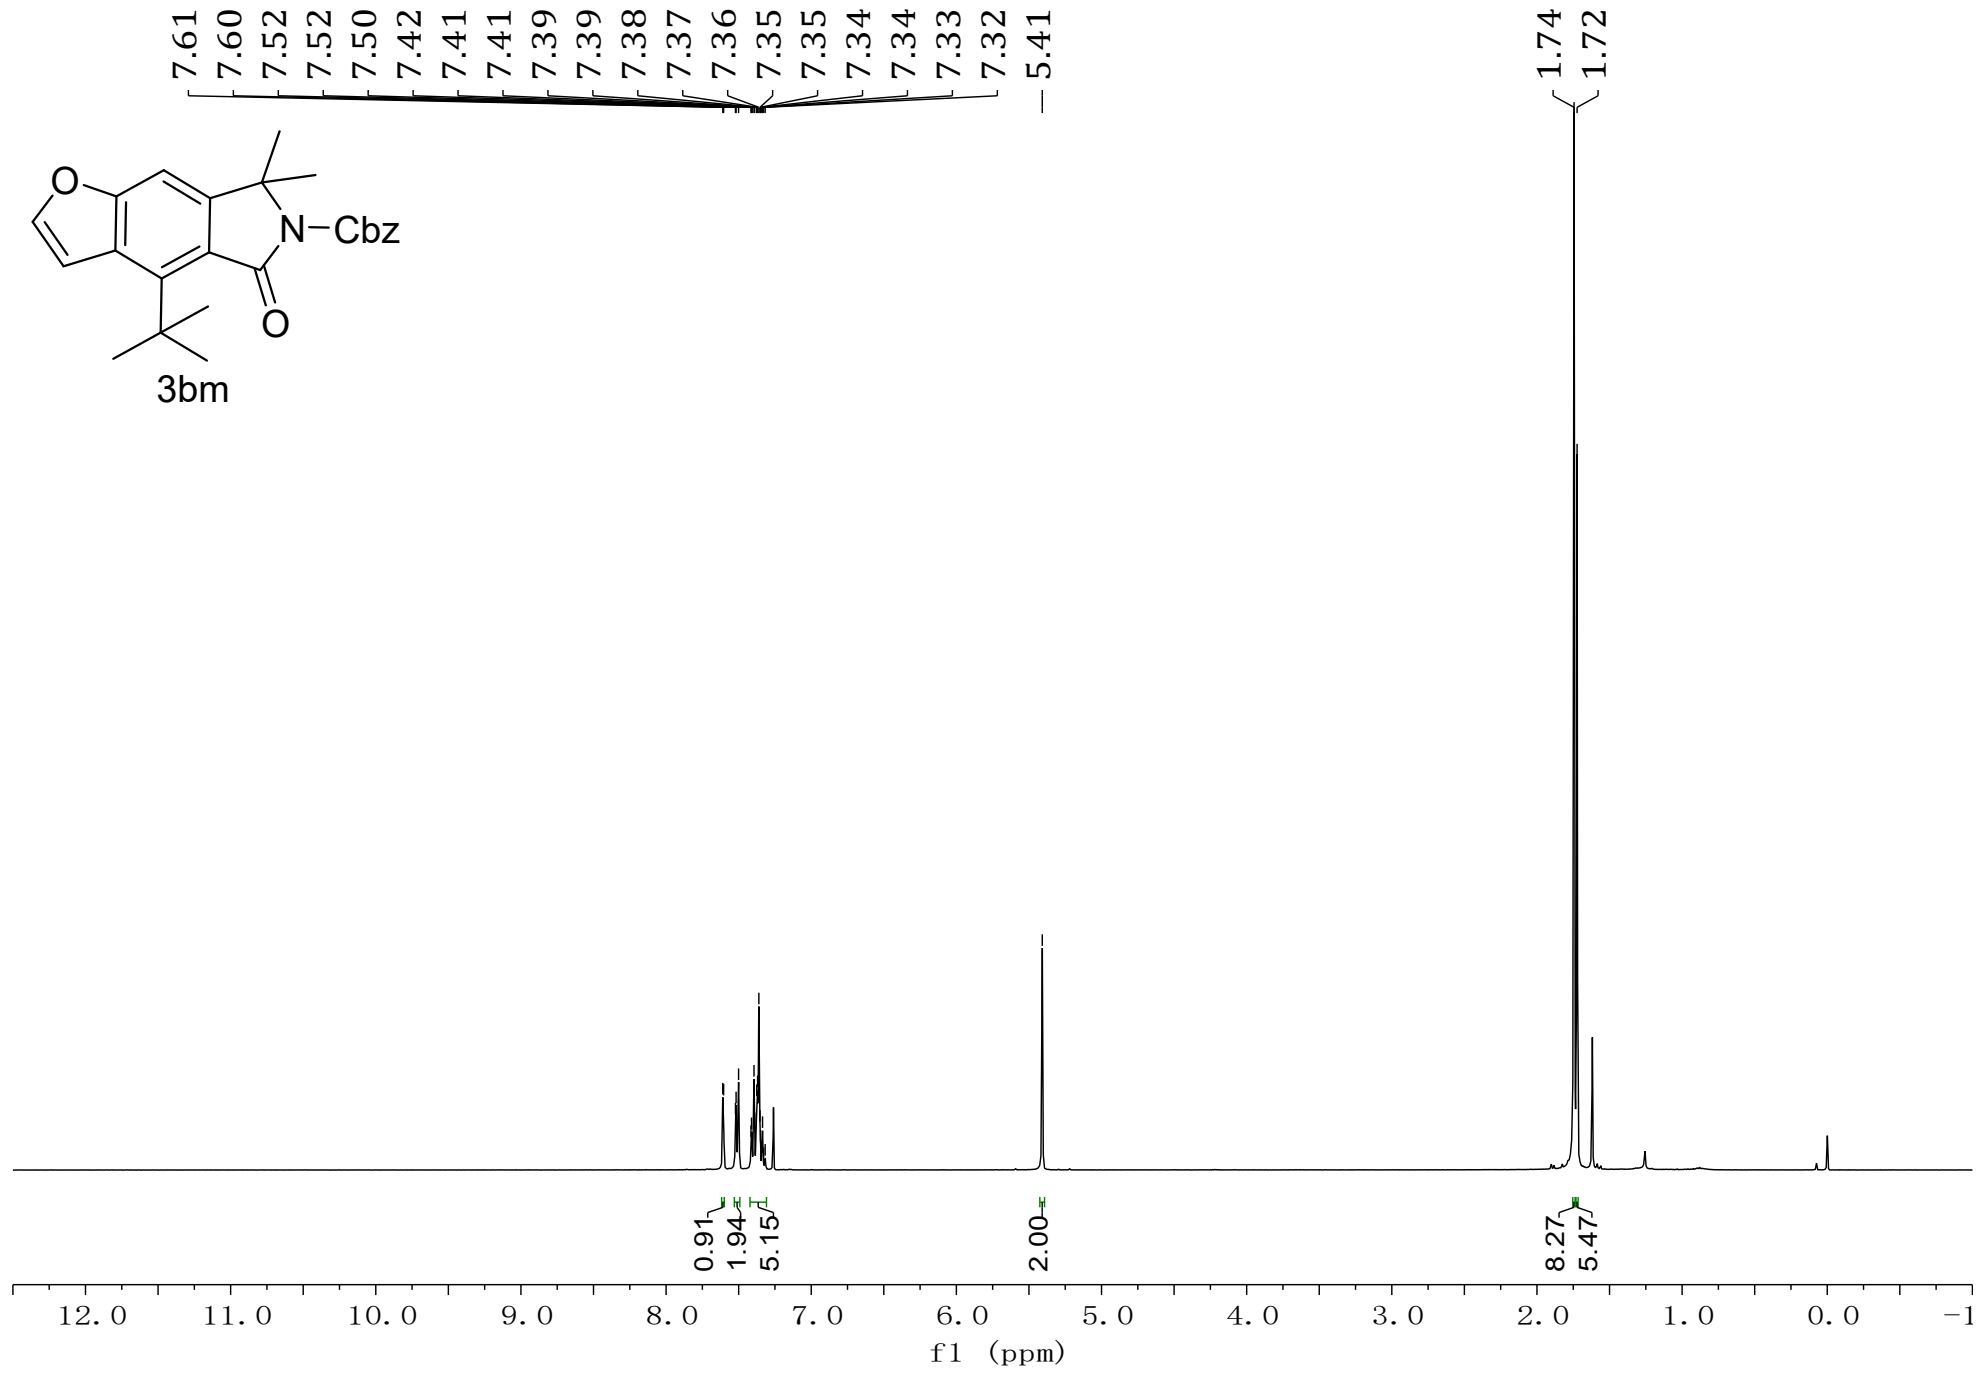

<sup>1</sup>H NMR (400 MHz, CDCl<sub>3</sub>) spectra of **3bm**.

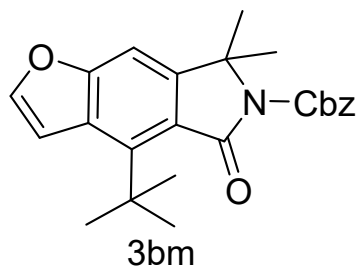

166.3  
159.0  
153.0  
152.3  
148.7  
144.9  
136.0  
128.8  
128.4  
126.7  
121.0  
109.6  
102.7

67.9  
61.8

38.9  
32.3  
27.7

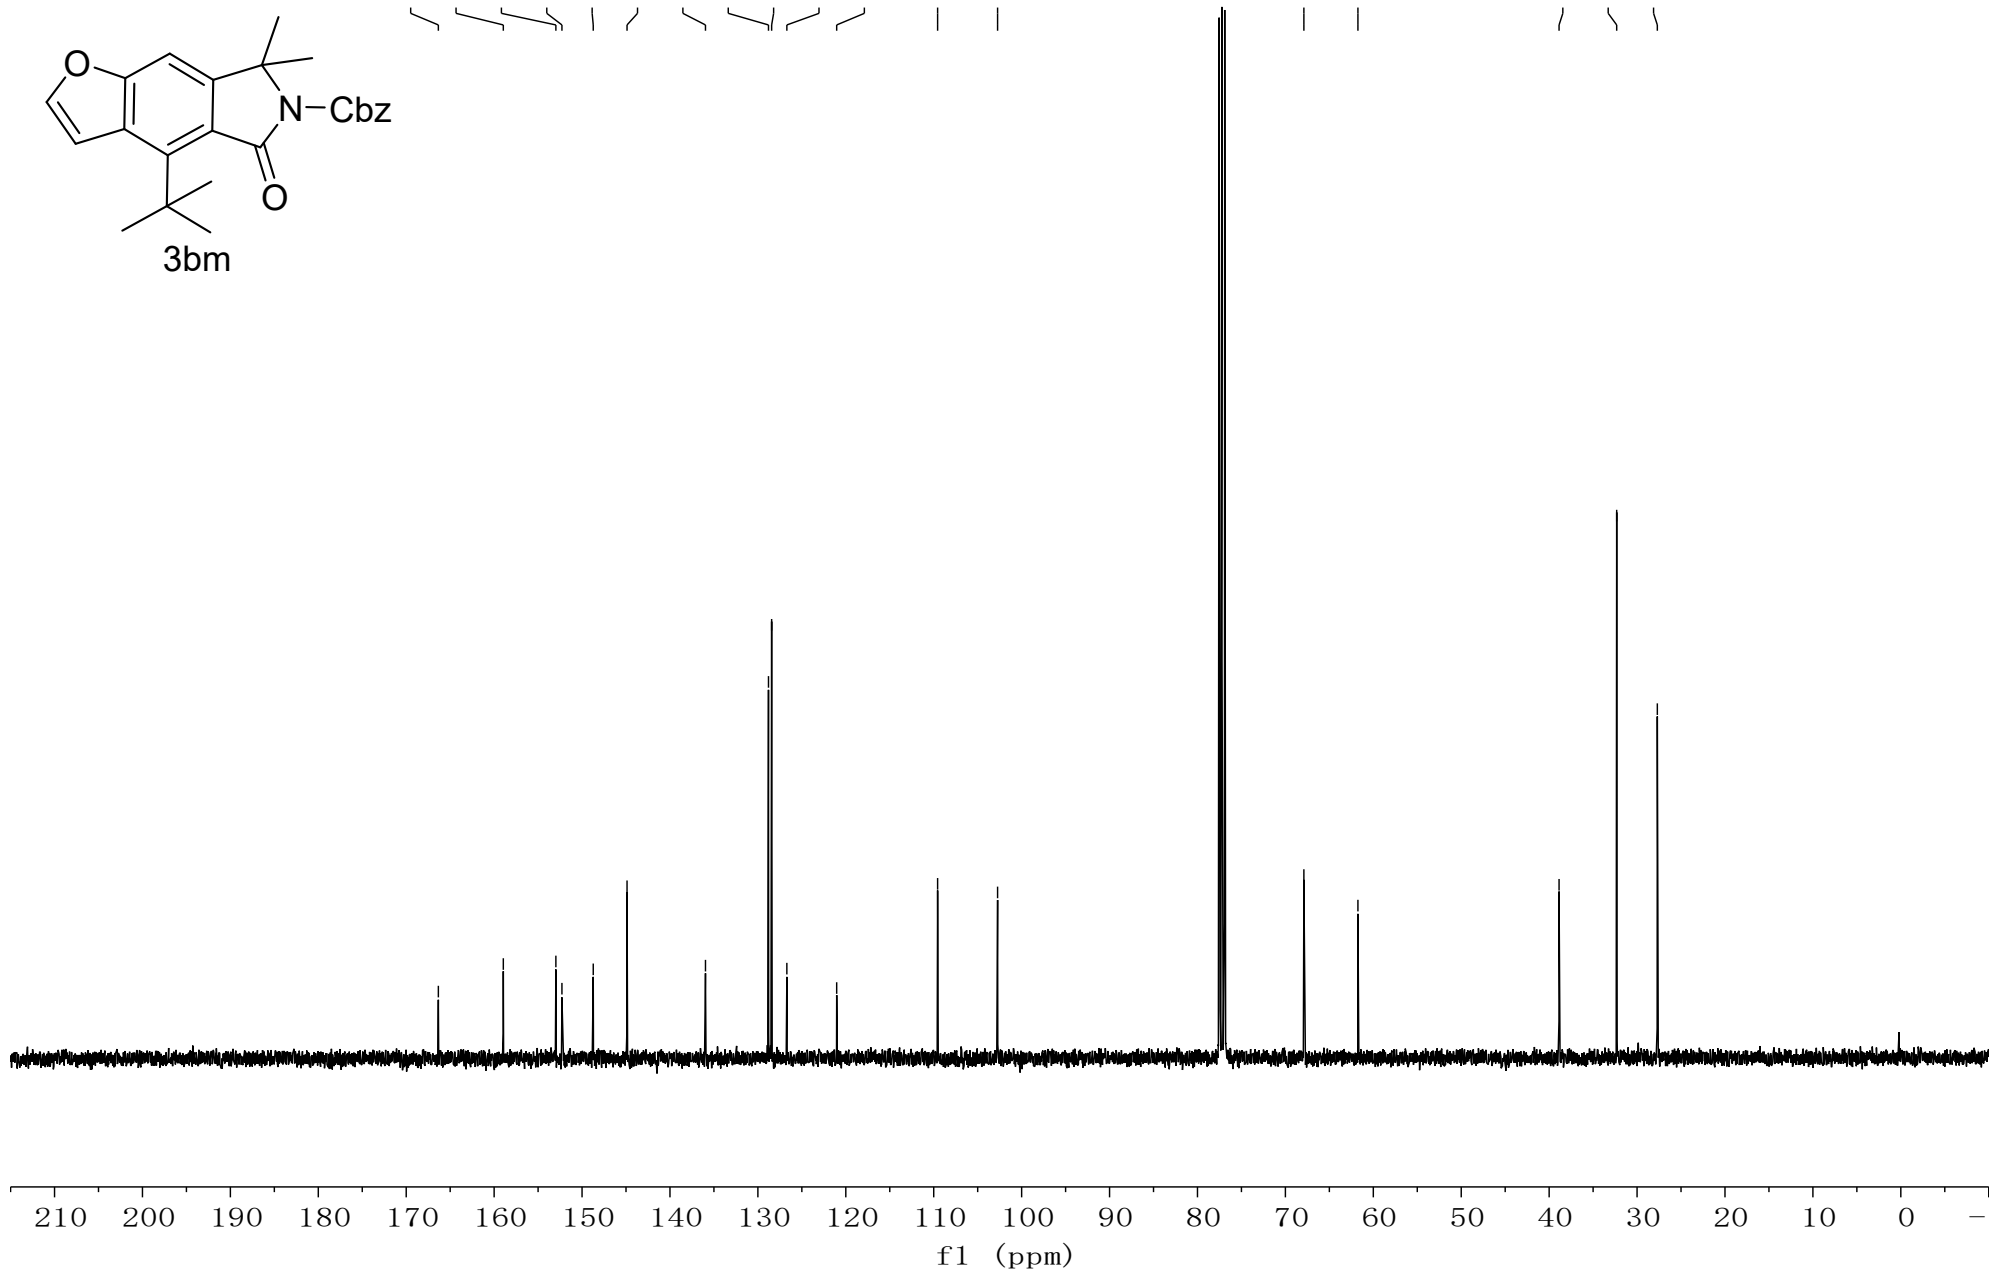

<sup>13</sup>C NMR (100 MHz, CDCl<sub>3</sub>) spectra of **3bm**.

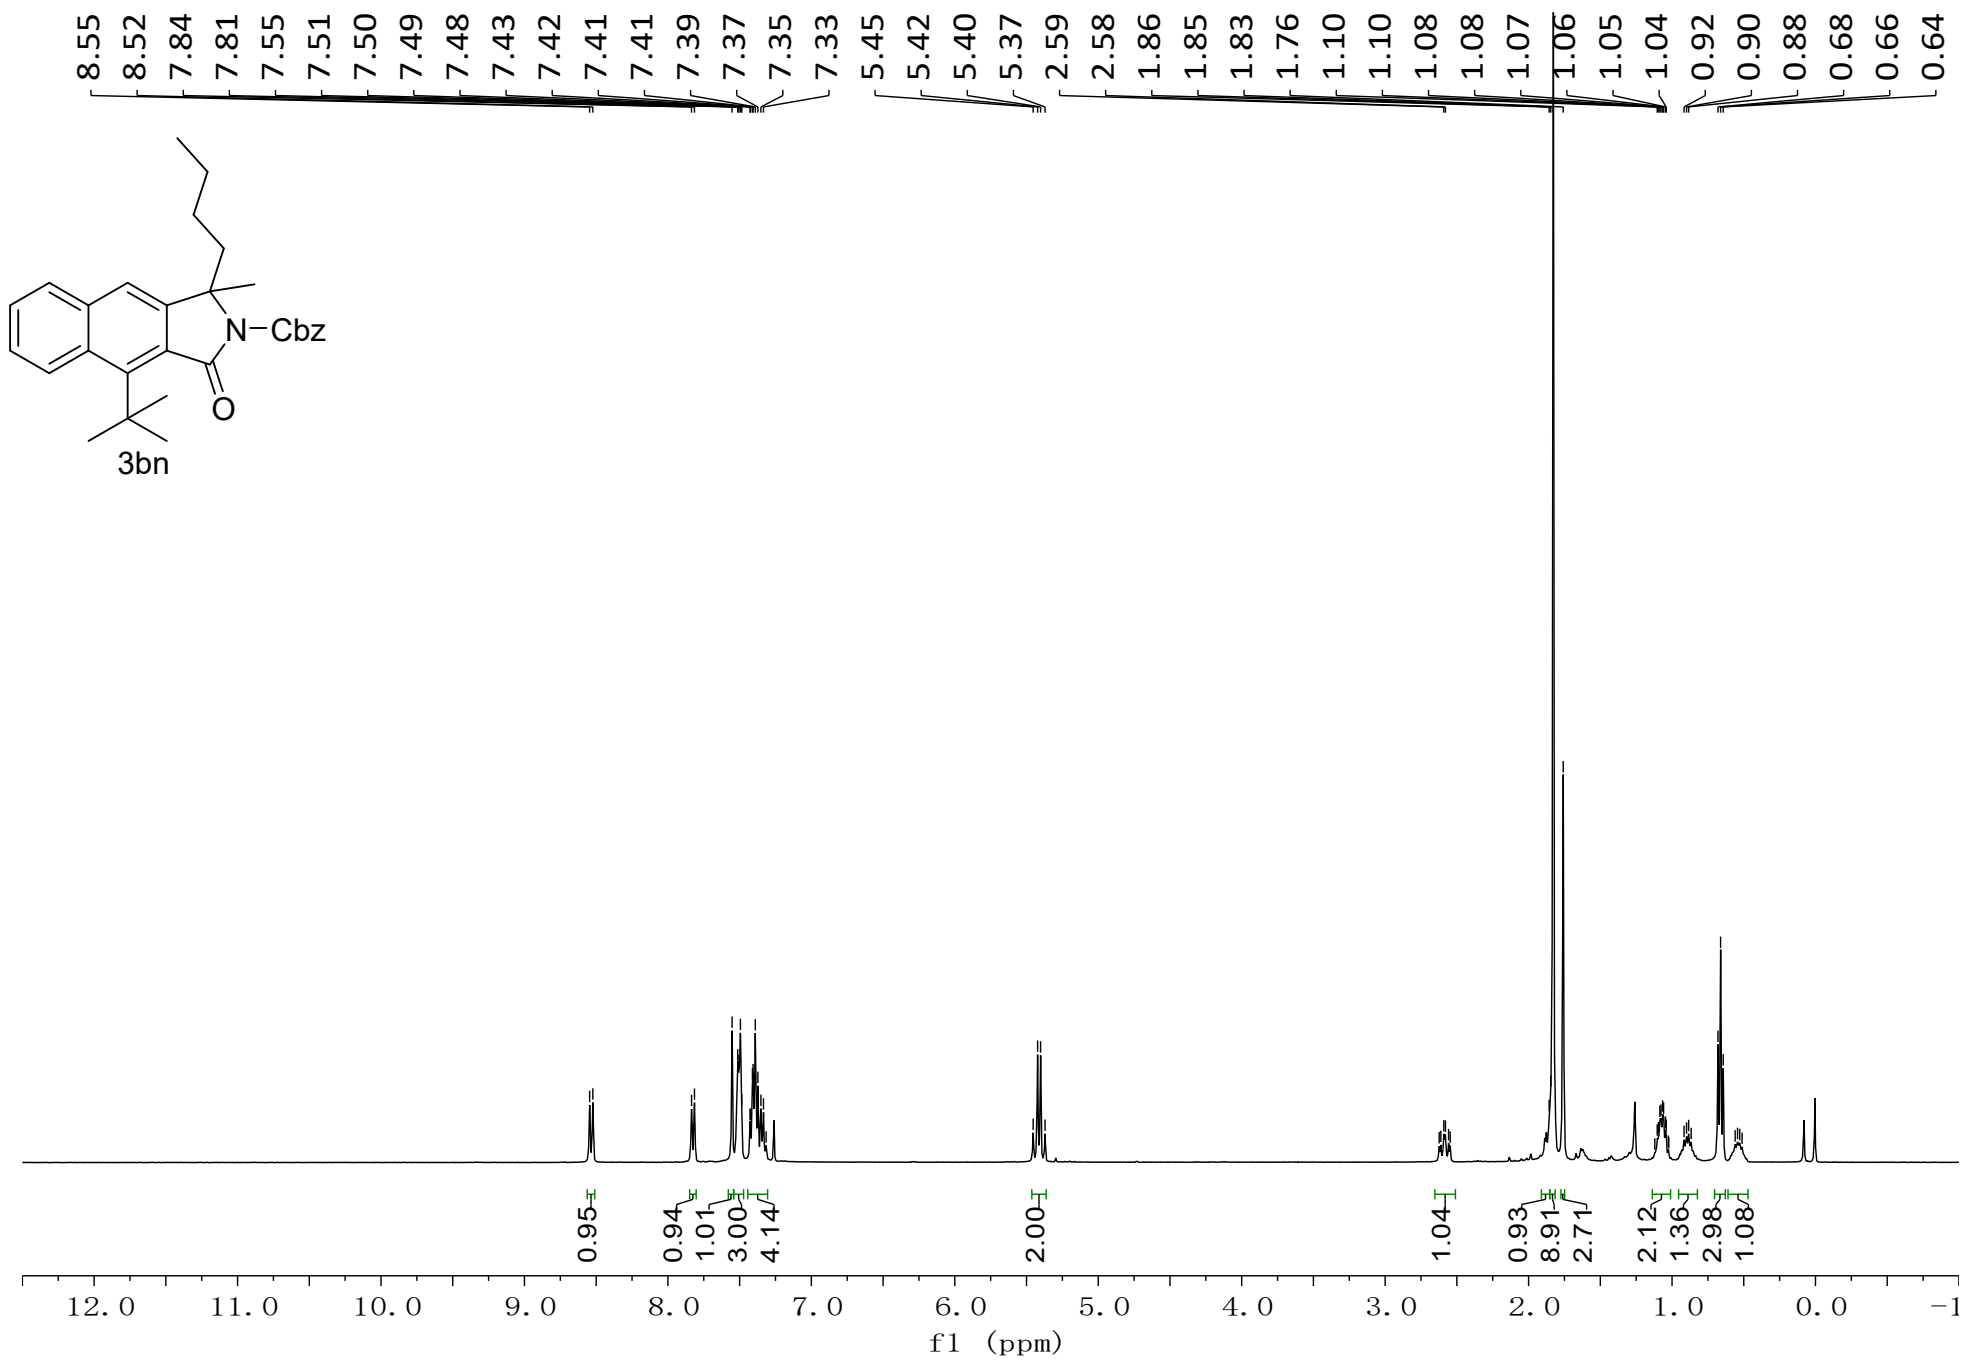

<sup>1</sup>H NMR (400 MHz, CDCl<sub>3</sub>) spectra of **3bn**.

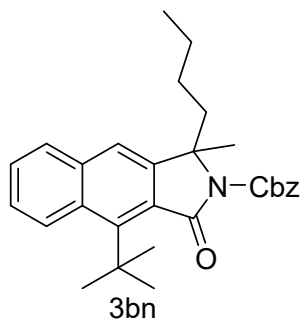

167.1  
153.1  
152.1  
145.8  
136.6  
135.8  
132.8  
128.5  
128.2  
128.2  
128.2  
128.1  
127.0  
126.7  
123.7  
118.2

67.6  
65.3

38.8  
38.7  
33.2  
27.8  
25.4  
22.3  
13.7

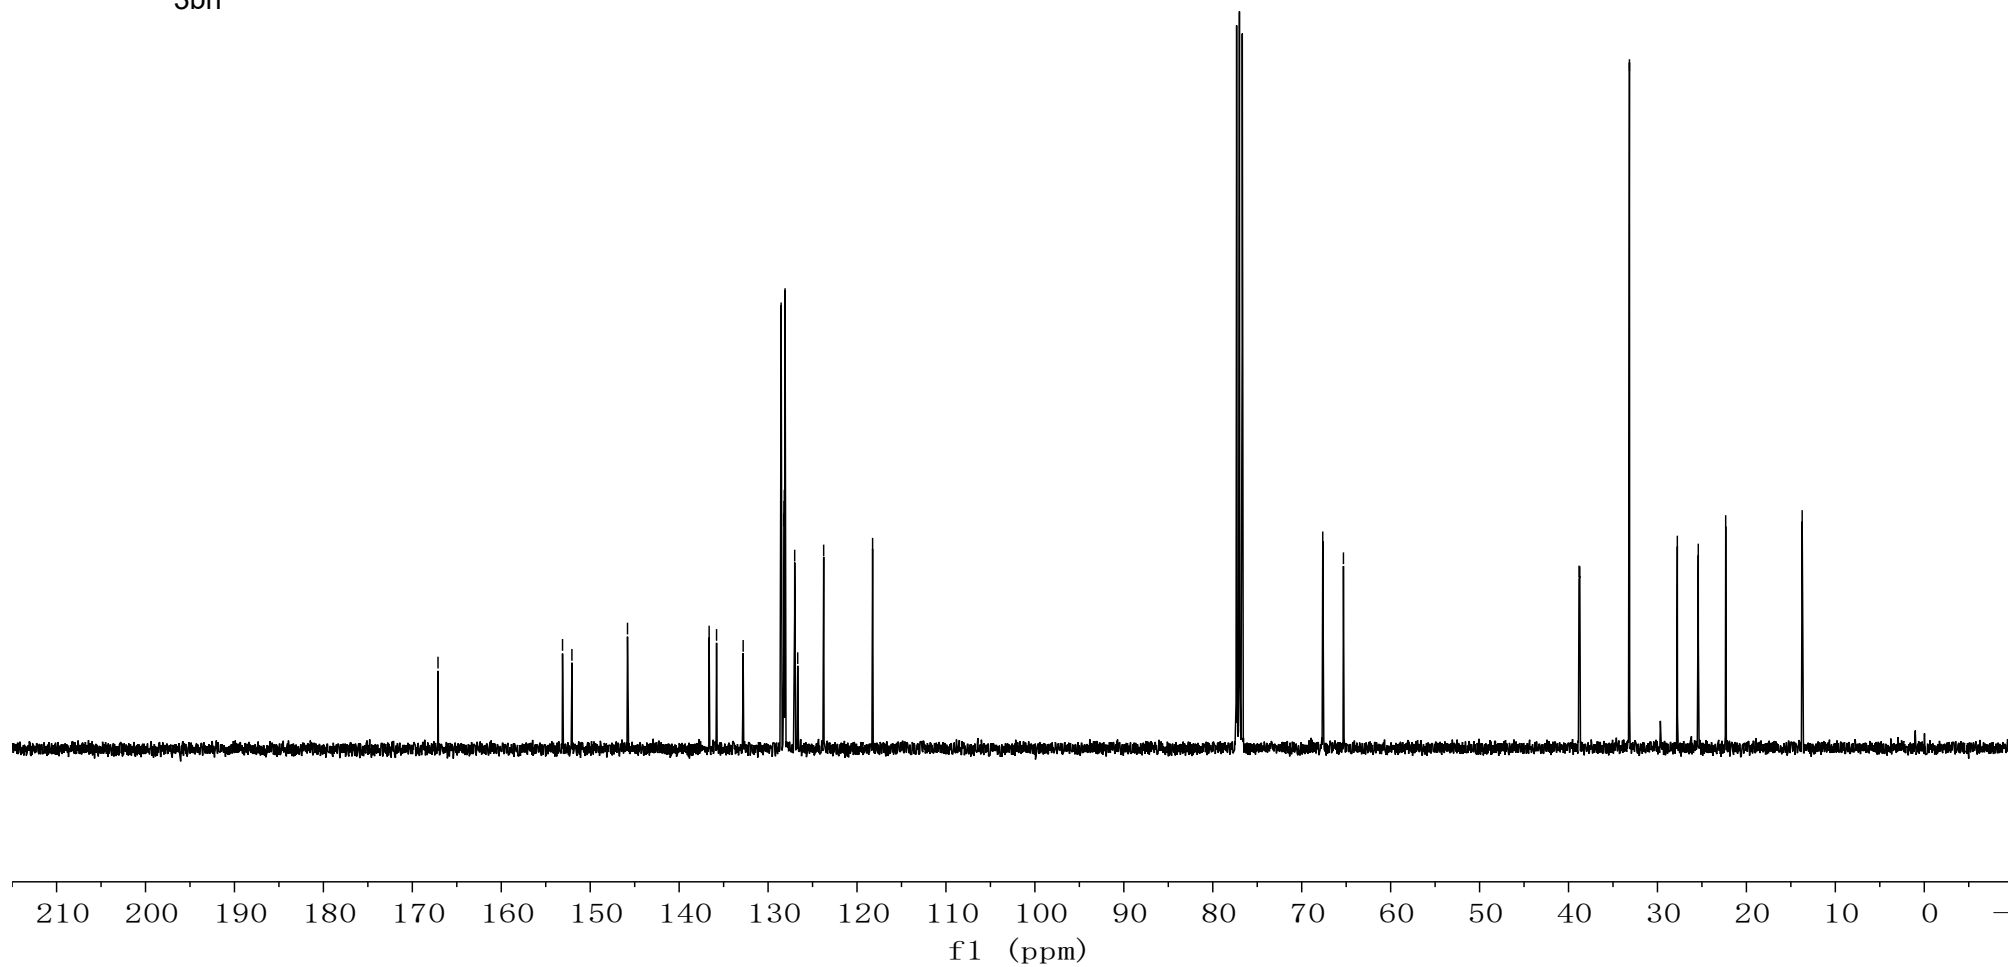

<sup>13</sup>C NMR (100 MHz, CDCl<sub>3</sub>) spectra of **3bn**.

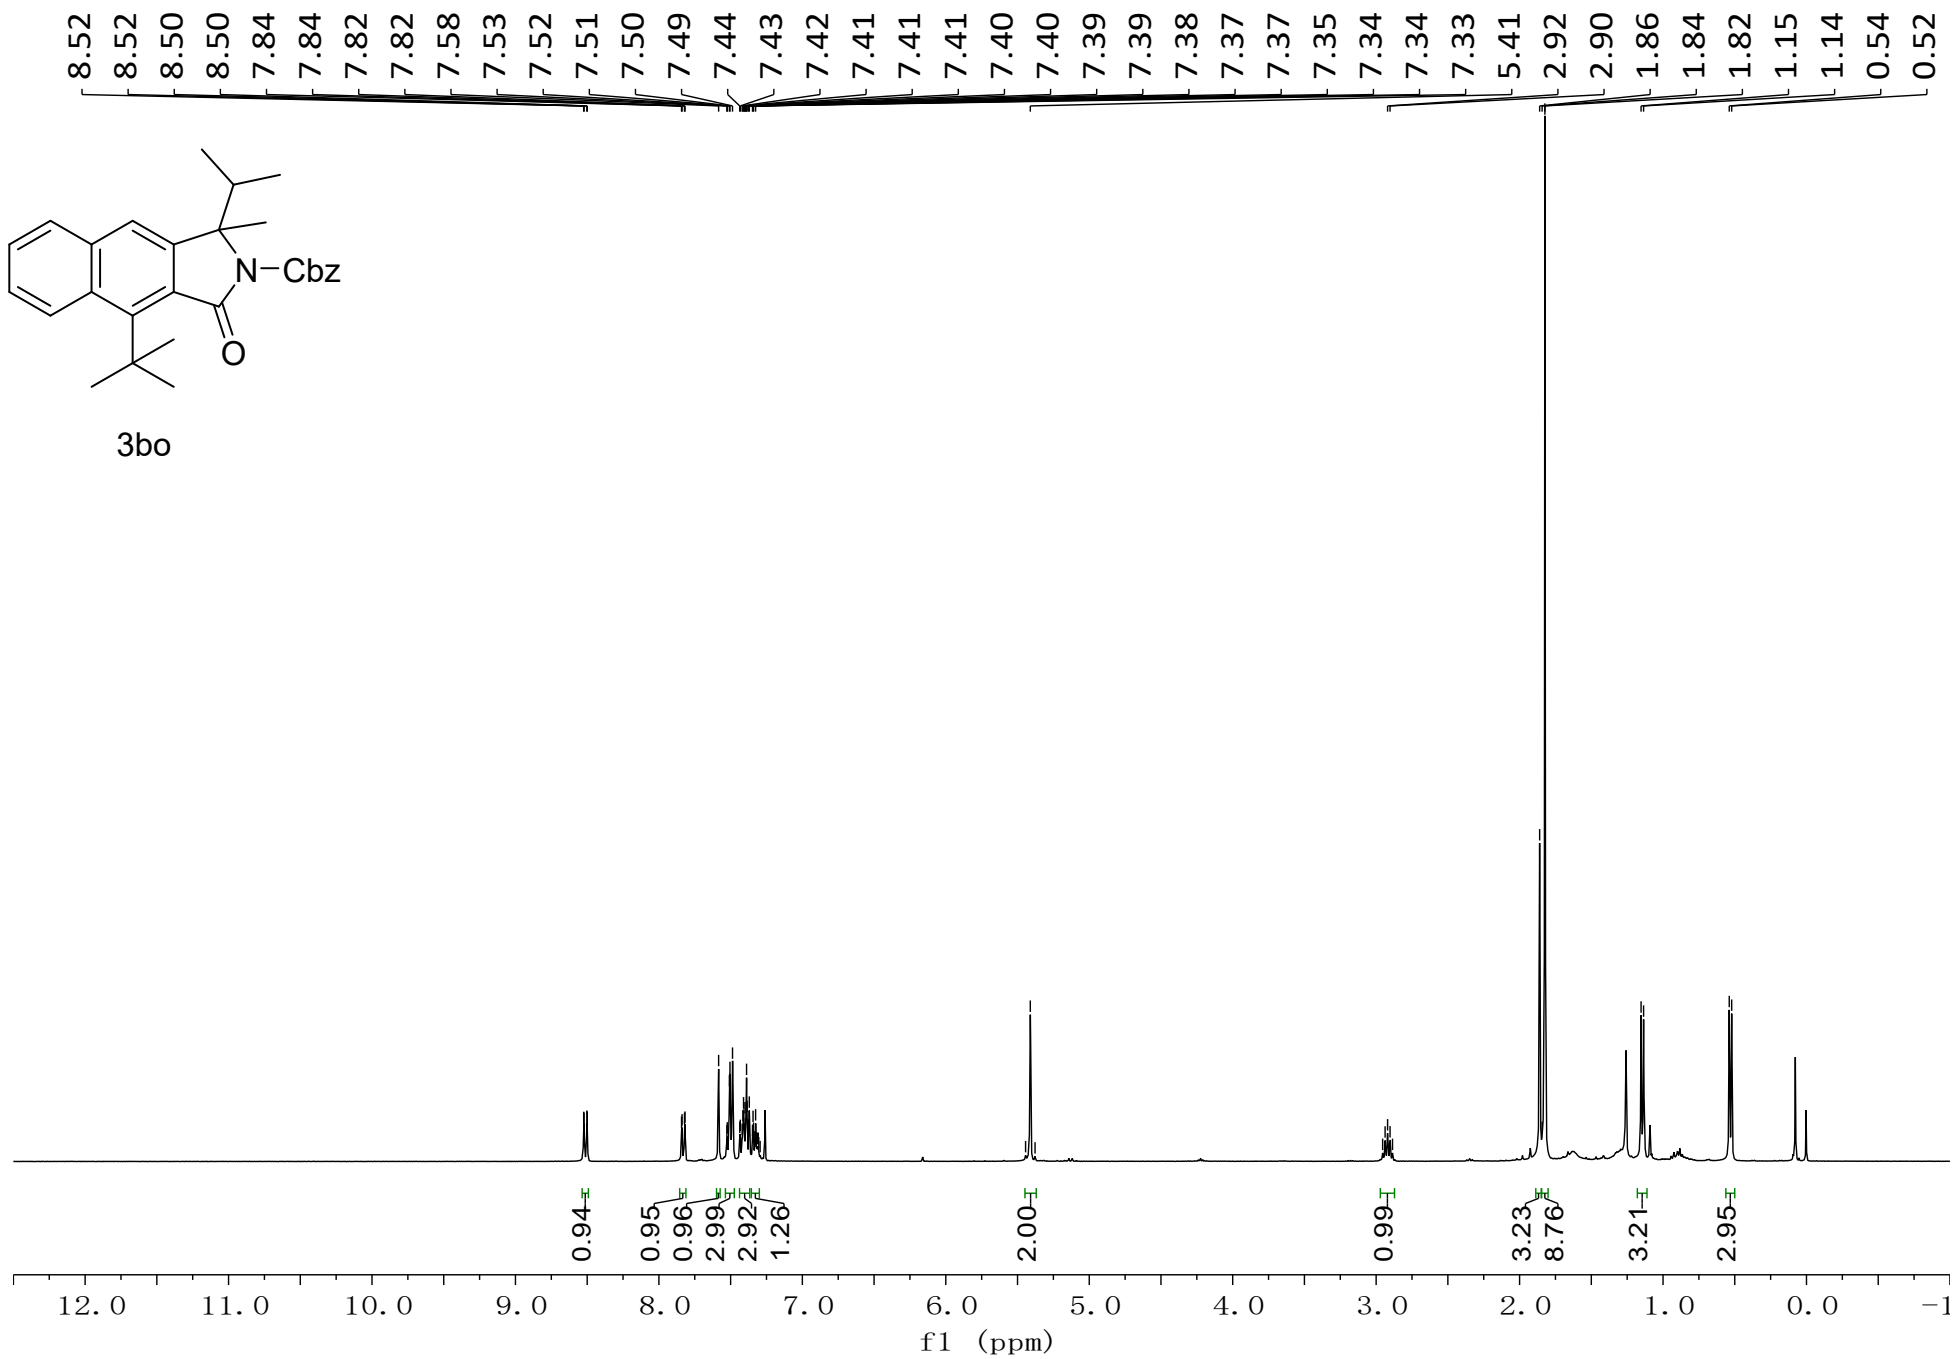

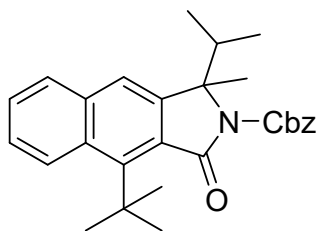

3bo

167.0  
153.1  
152.4  
142.6  
135.9  
132.7  
128.5  
128.5  
128.1  
128.0  
127.8  
127.5  
127.0  
123.9  
120.3

77.0  
68.5  
67.7

38.7  
34.3  
33.0  
24.7  
17.8  
17.1

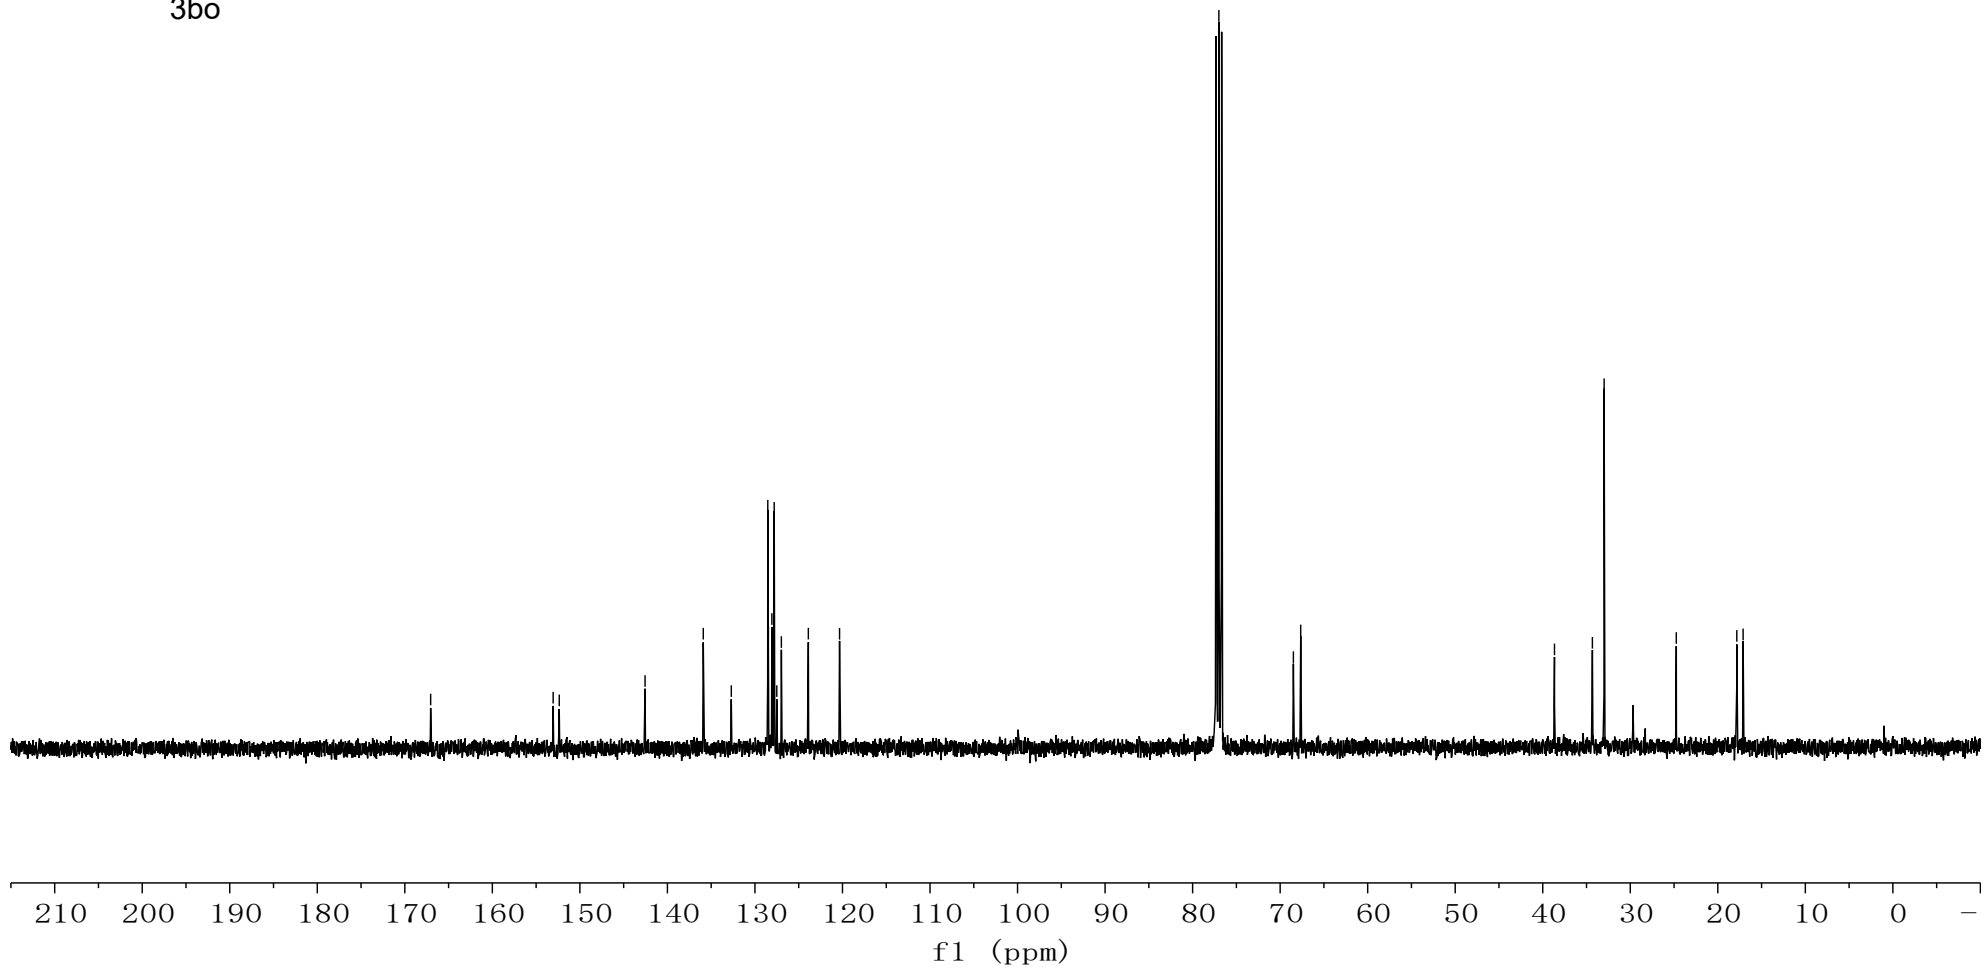

<sup>13</sup>C NMR (100 MHz, CDCl<sub>3</sub>) spectra of **3bo**.



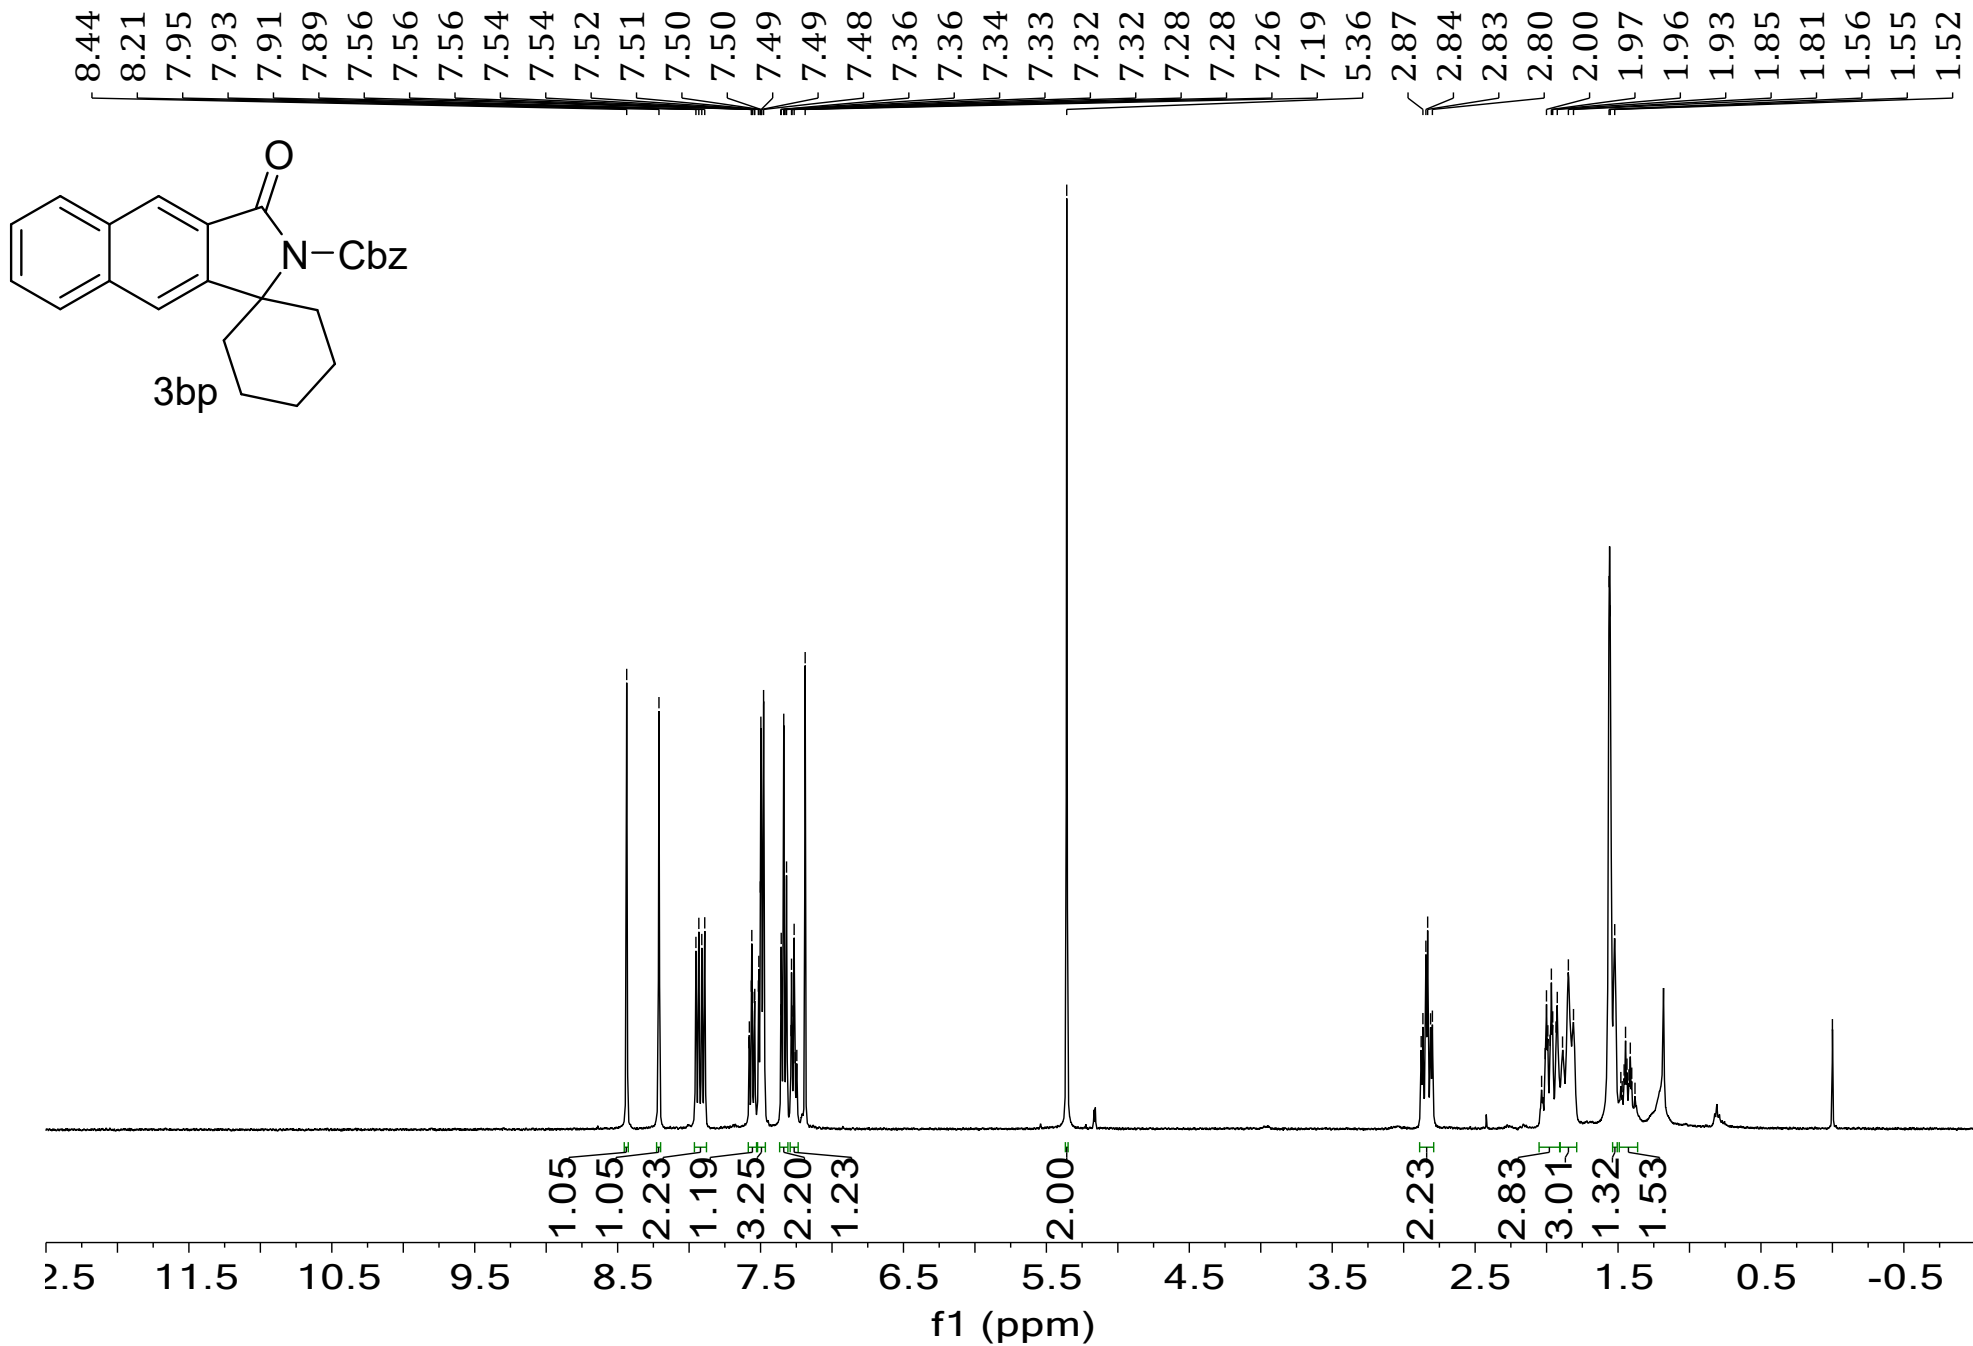

<sup>1</sup>H NMR (400 MHz, CDCl<sub>3</sub>) spectra of **3bp**.

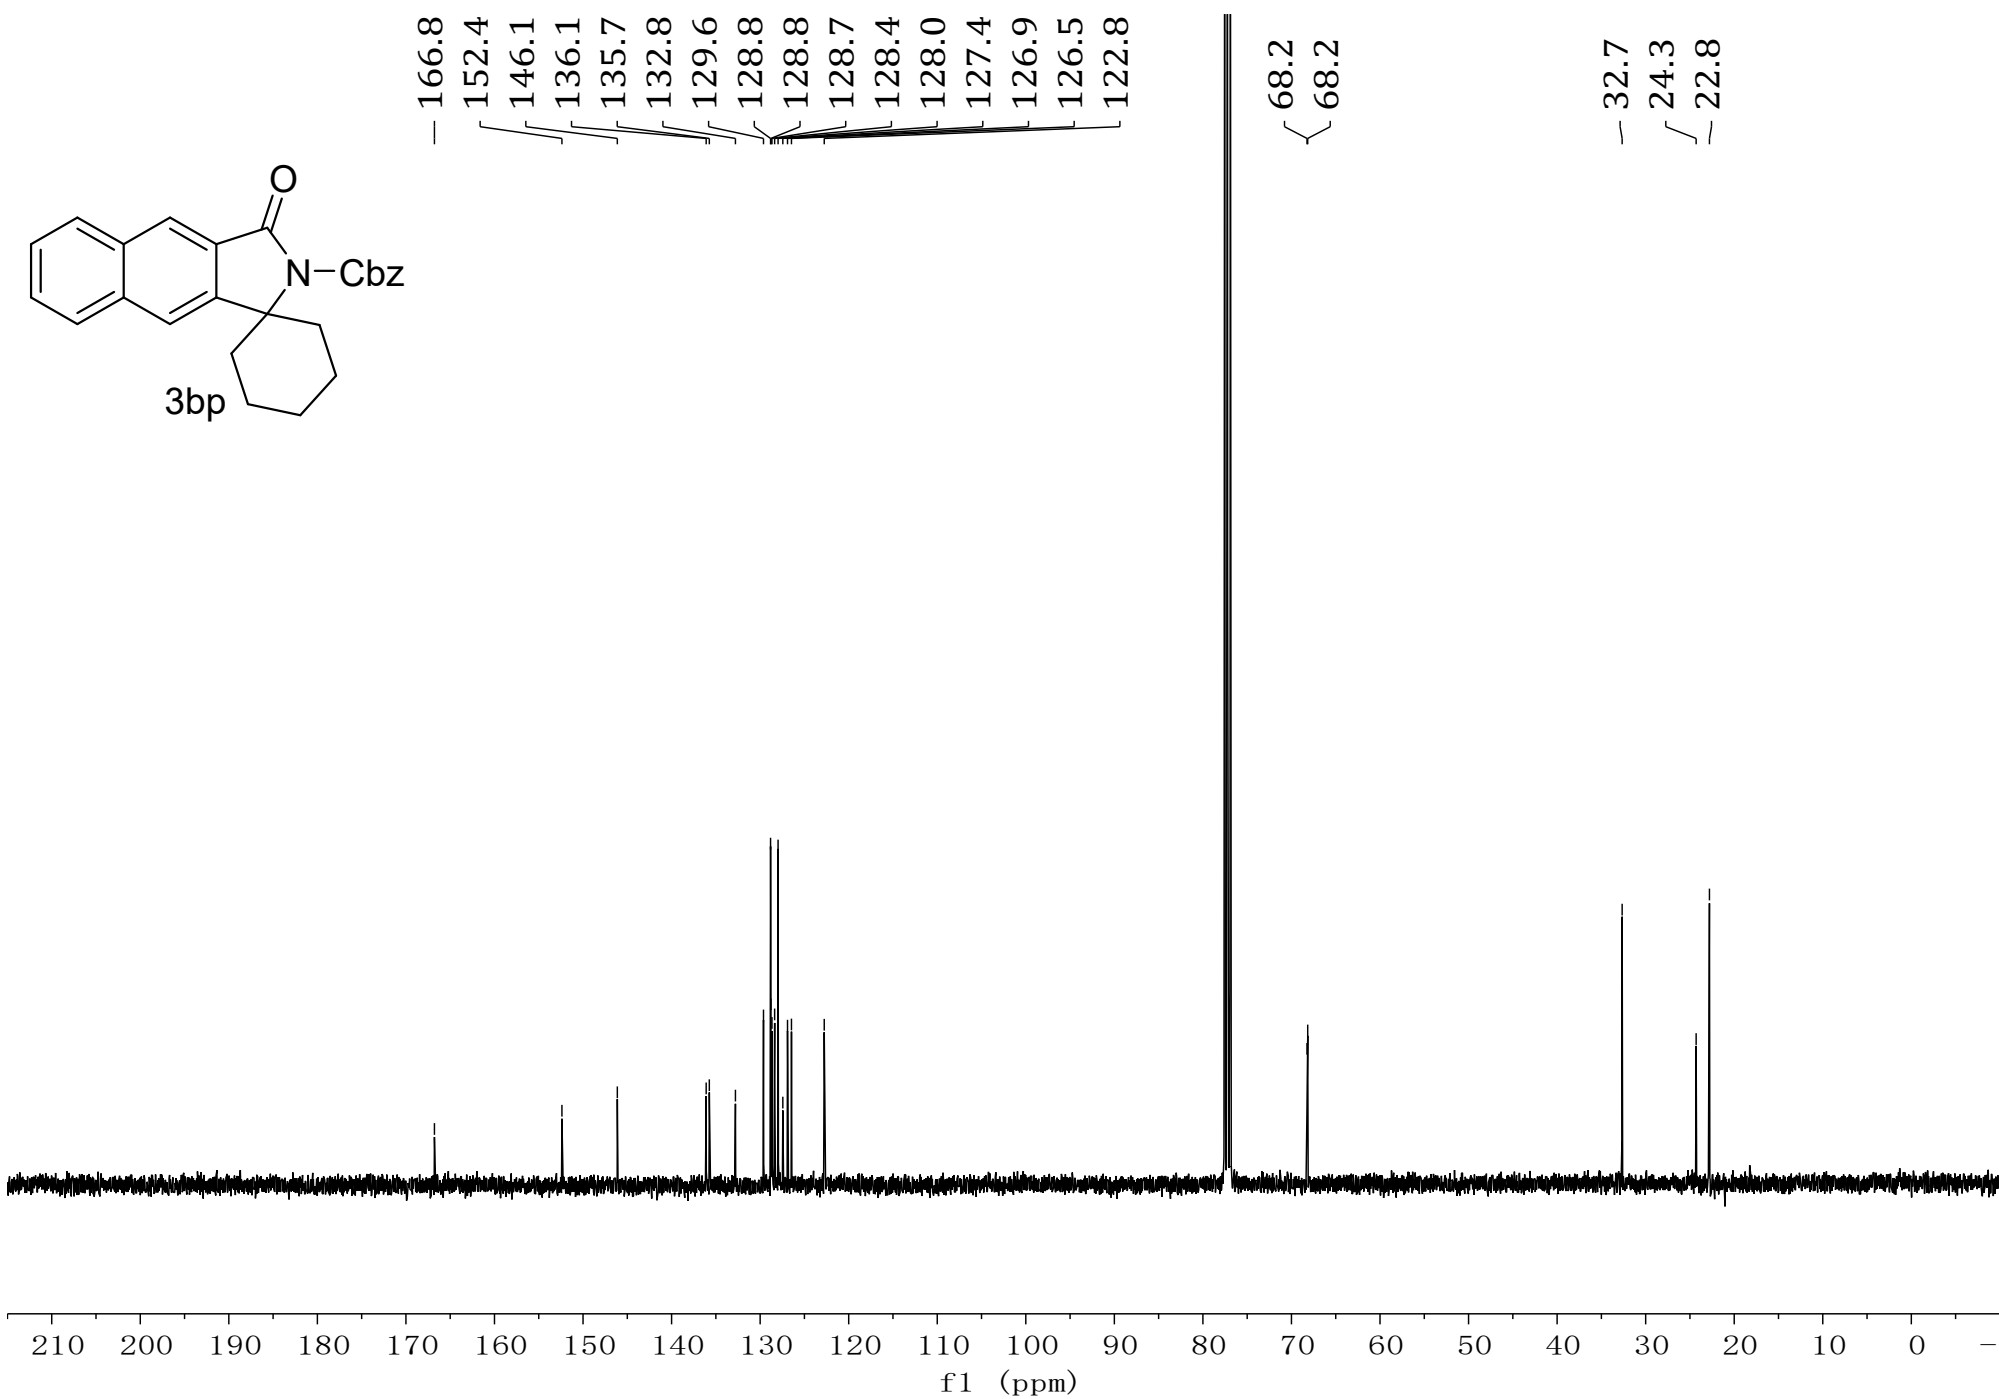

<sup>13</sup>C NMR (100 MHz, CDCl<sub>3</sub>) spectra of **3bp**.

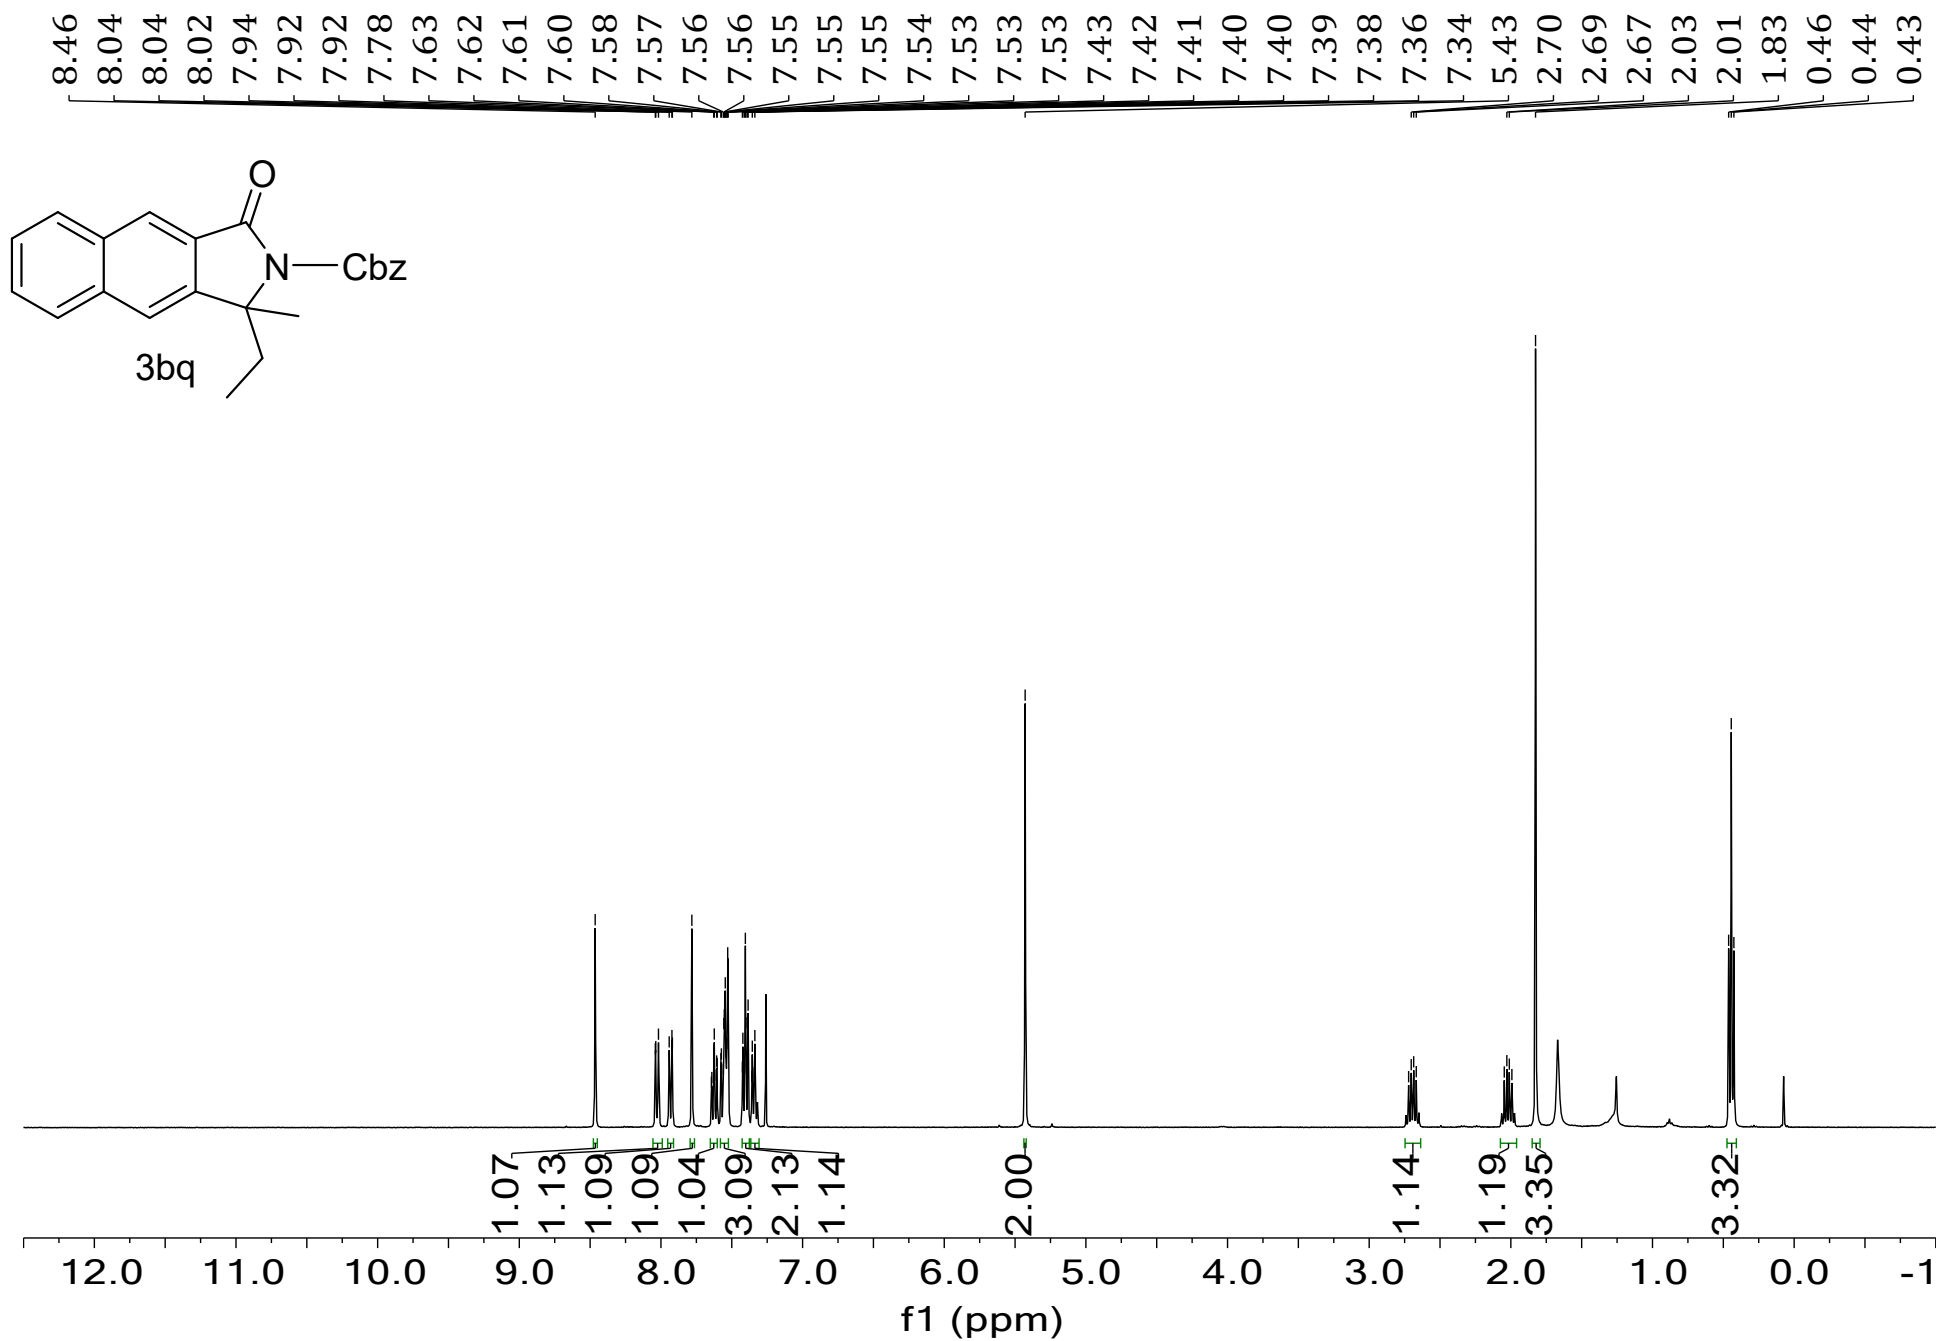

<sup>1</sup>H NMR (400 MHz, CDCl<sub>3</sub>) spectra of **3bq**

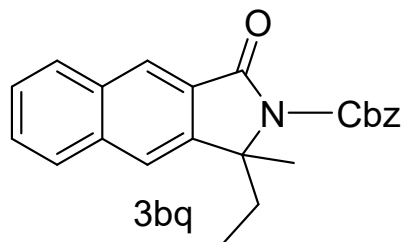

167.4  
152.4  
145.6  
137.1  
136.1  
133.6  
130.3  
129.1  
129.0  
128.7  
128.7  
128.4  
128.2  
127.1  
126.4  
120.4

68.9  
68.4

32.3  
27.5

8.4

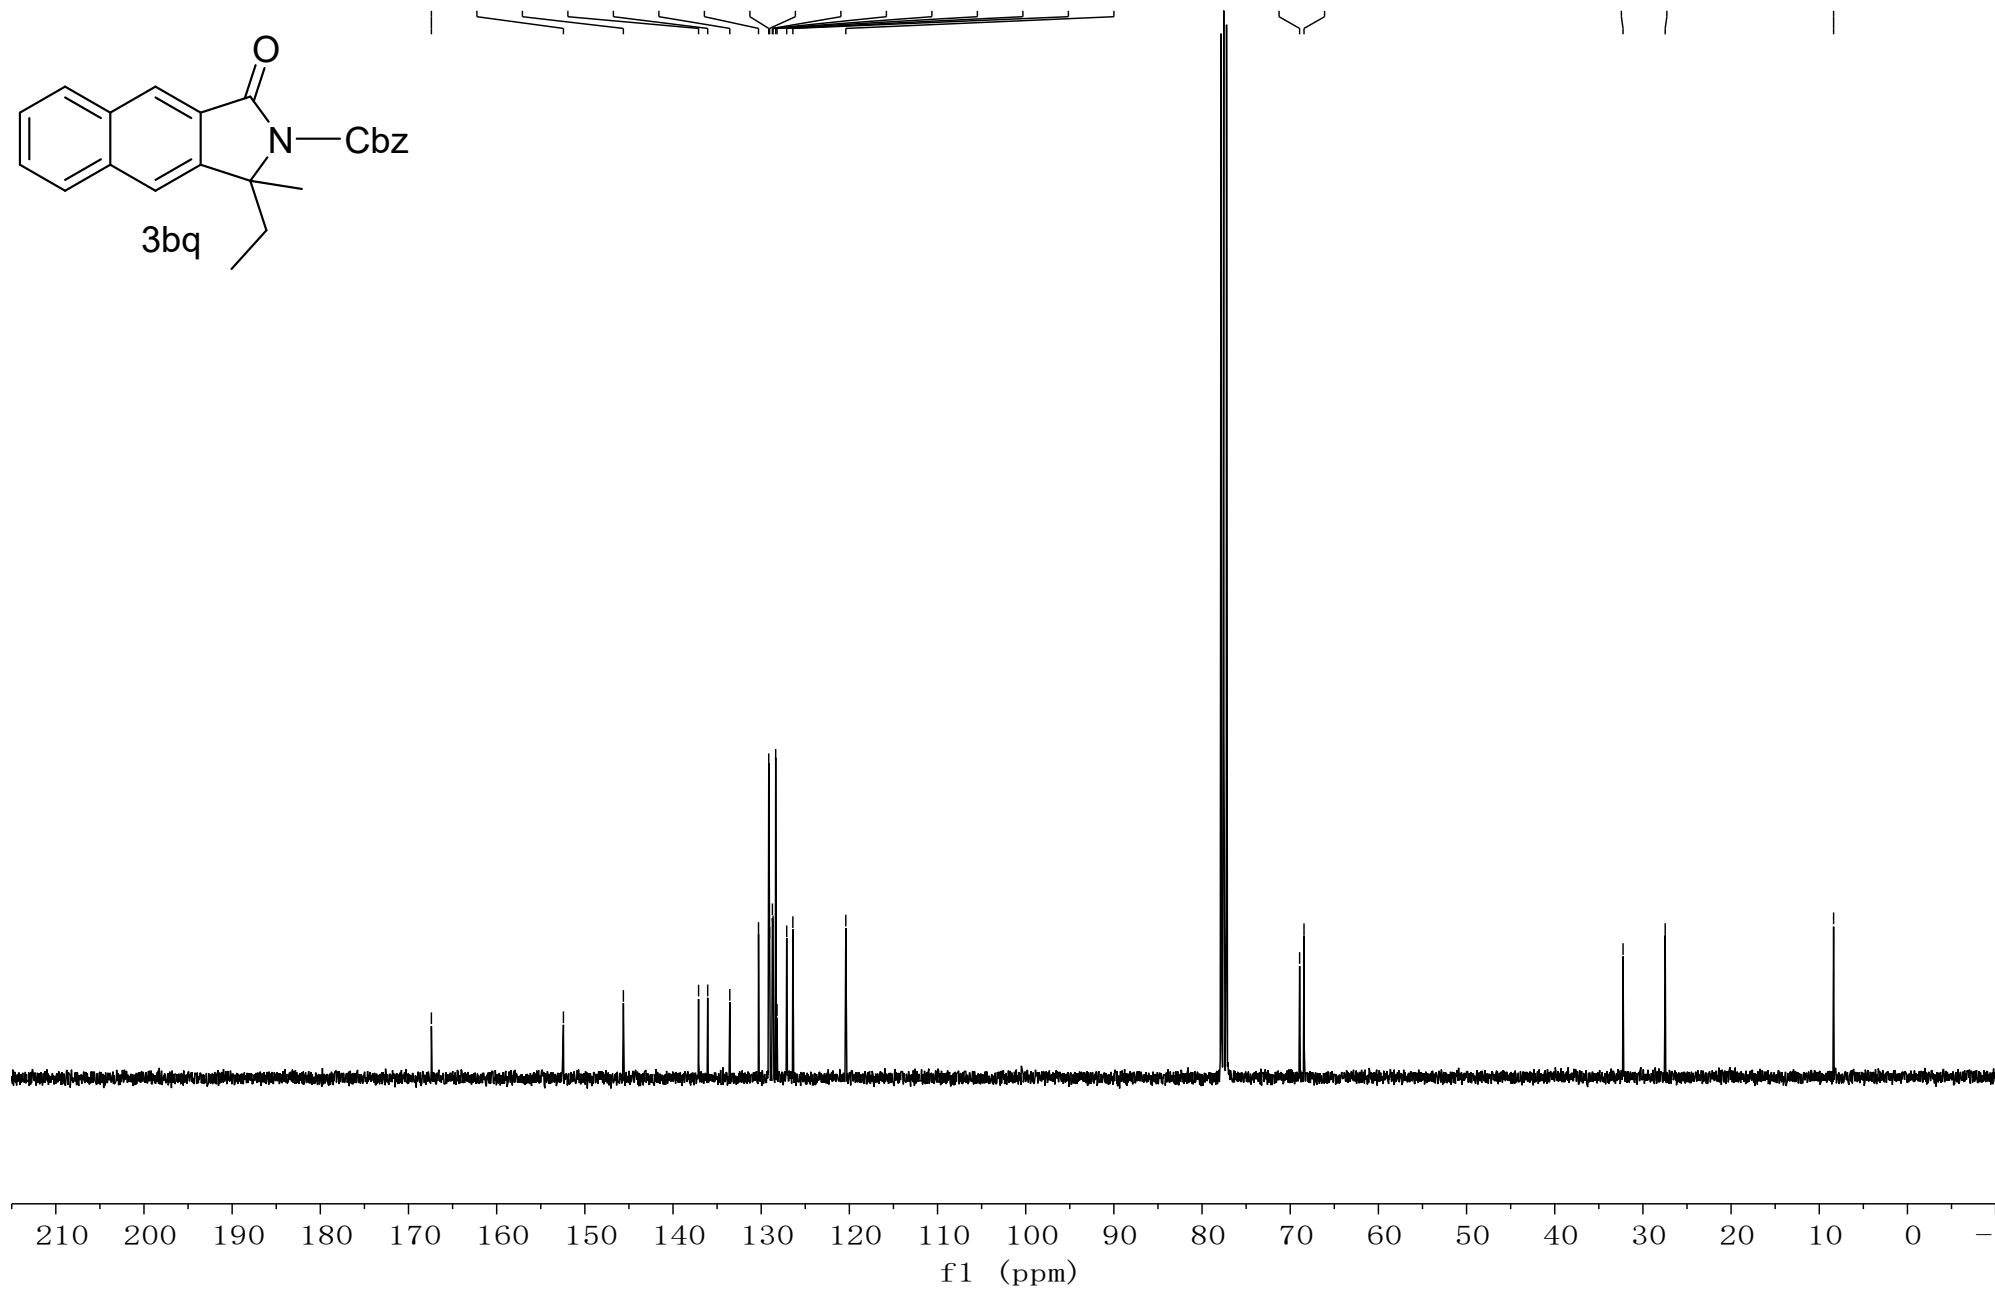

<sup>13</sup>C NMR (100 MHz, CDCl<sub>3</sub>) spectra of **3bq**.

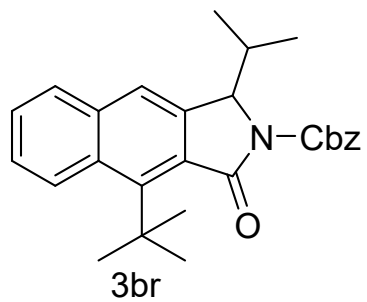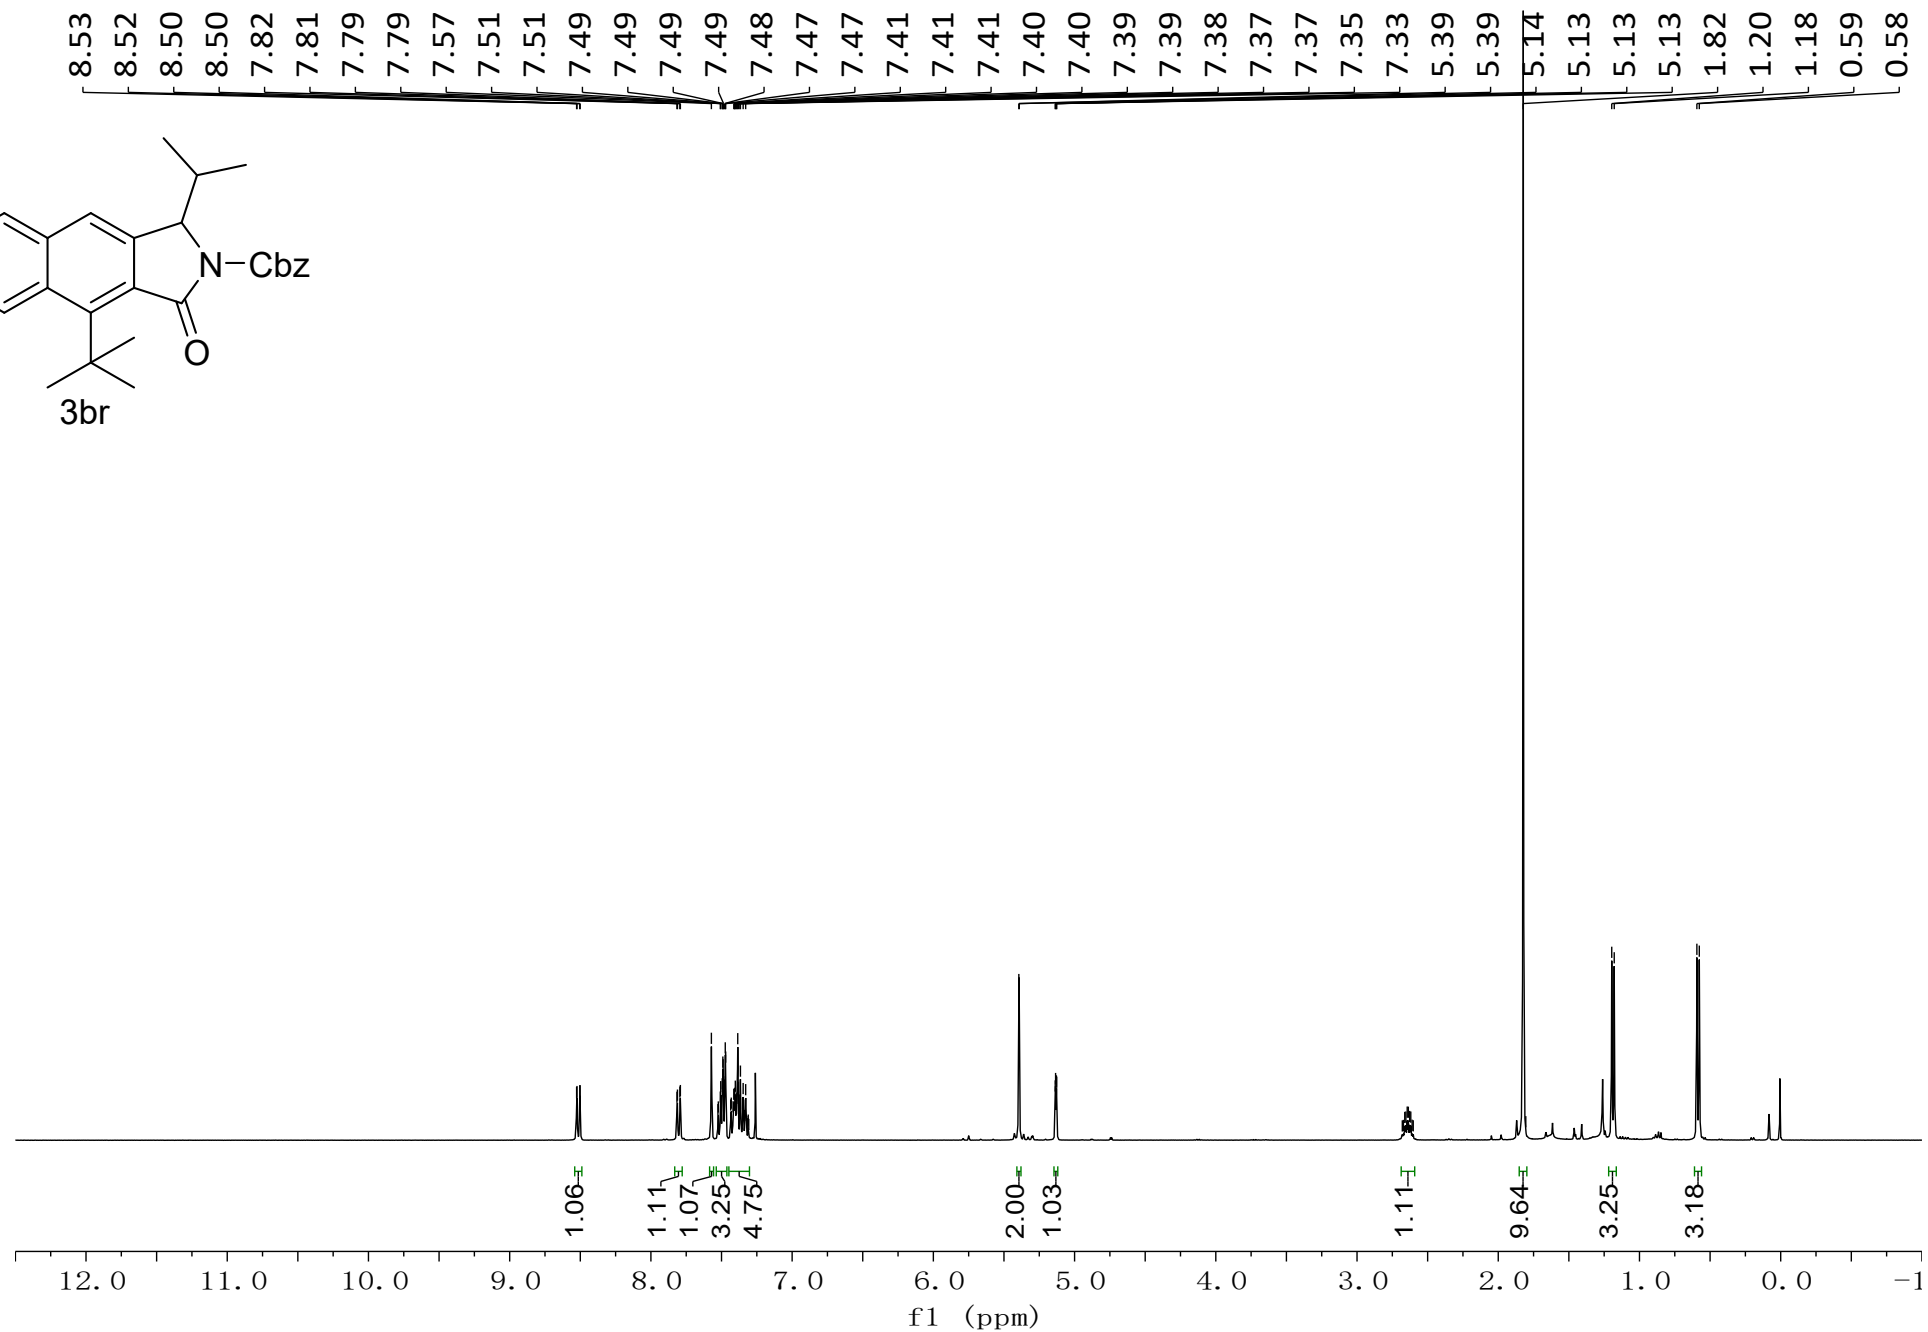

<sup>1</sup>H NMR (400 MHz, CDCl<sub>3</sub>) spectra of **3br**.

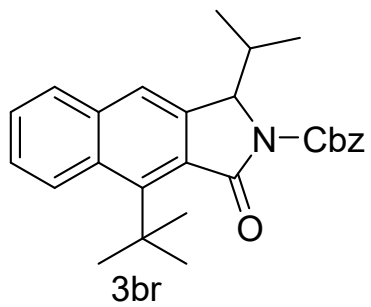

— 166.8  
/ 153.9  
\ 152.1  
/ 138.1  
/ 135.9  
/ 135.6  
/ 132.8  
/ 128.6  
/ 128.3  
/ 128.2  
/ 128.0  
/ 128.0  
/ 127.1  
/ 123.9  
/ 120.8

— 68.0  
— 63.1

/ 38.6  
/ 33.0  
/ 31.1

— 18.9  
— 15.4

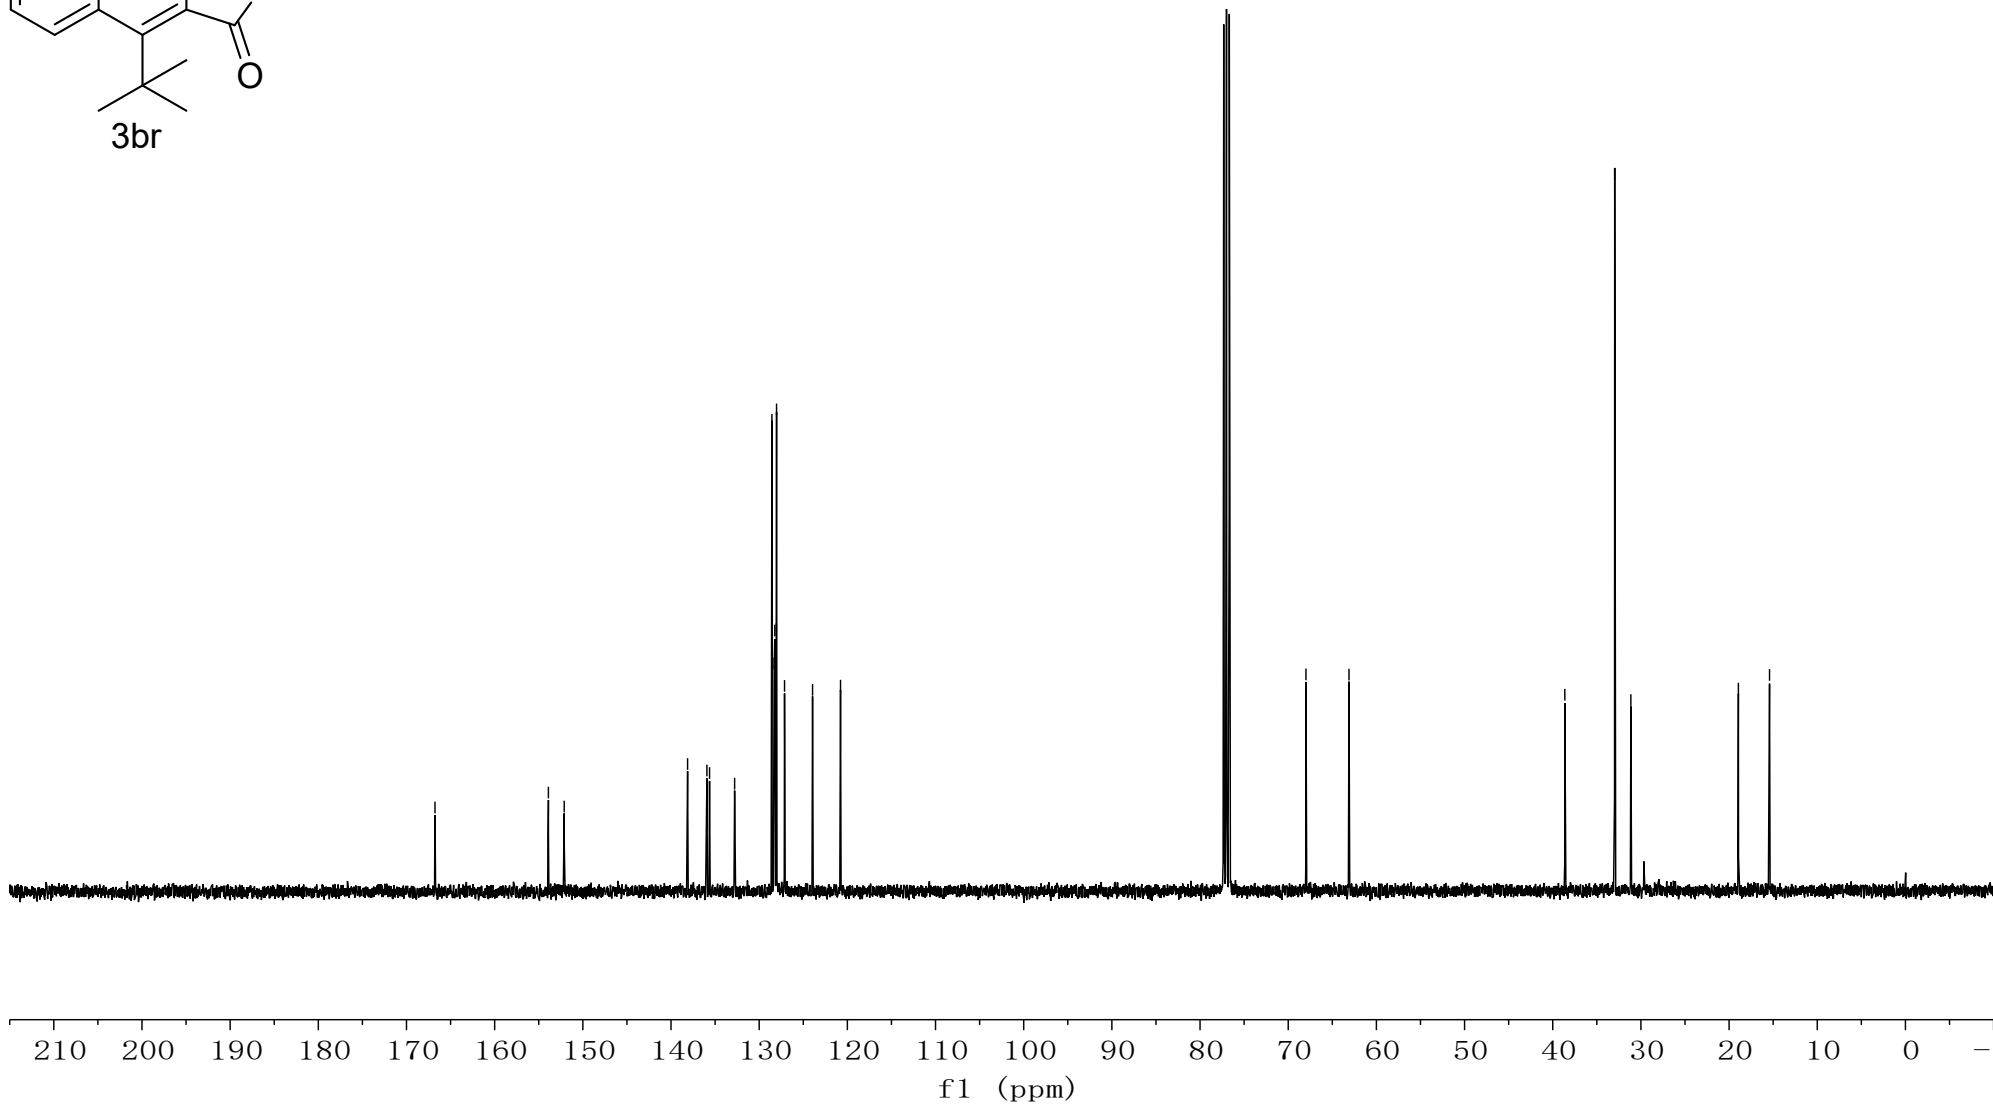

<sup>13</sup>C NMR (100 MHz, CDCl<sub>3</sub>) spectra of **3br**.



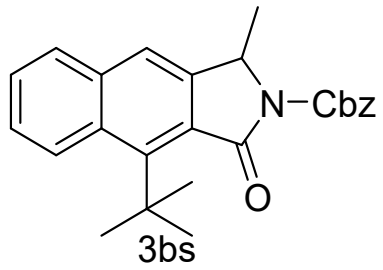

— 166.5  
/ 153.8  
/ 152.0  
/ 141.9  
/ 136.5  
/ 135.6  
/ 132.9  
/ 128.6  
/ 128.3  
/ 128.3  
/ 128.2  
/ 128.1  
/ 127.2  
/ 126.5  
/ 123.9  
/ 119.8

— 68.0

— 54.6

~ 38.8

~ 33.2

~ 29.7

~ 22.0

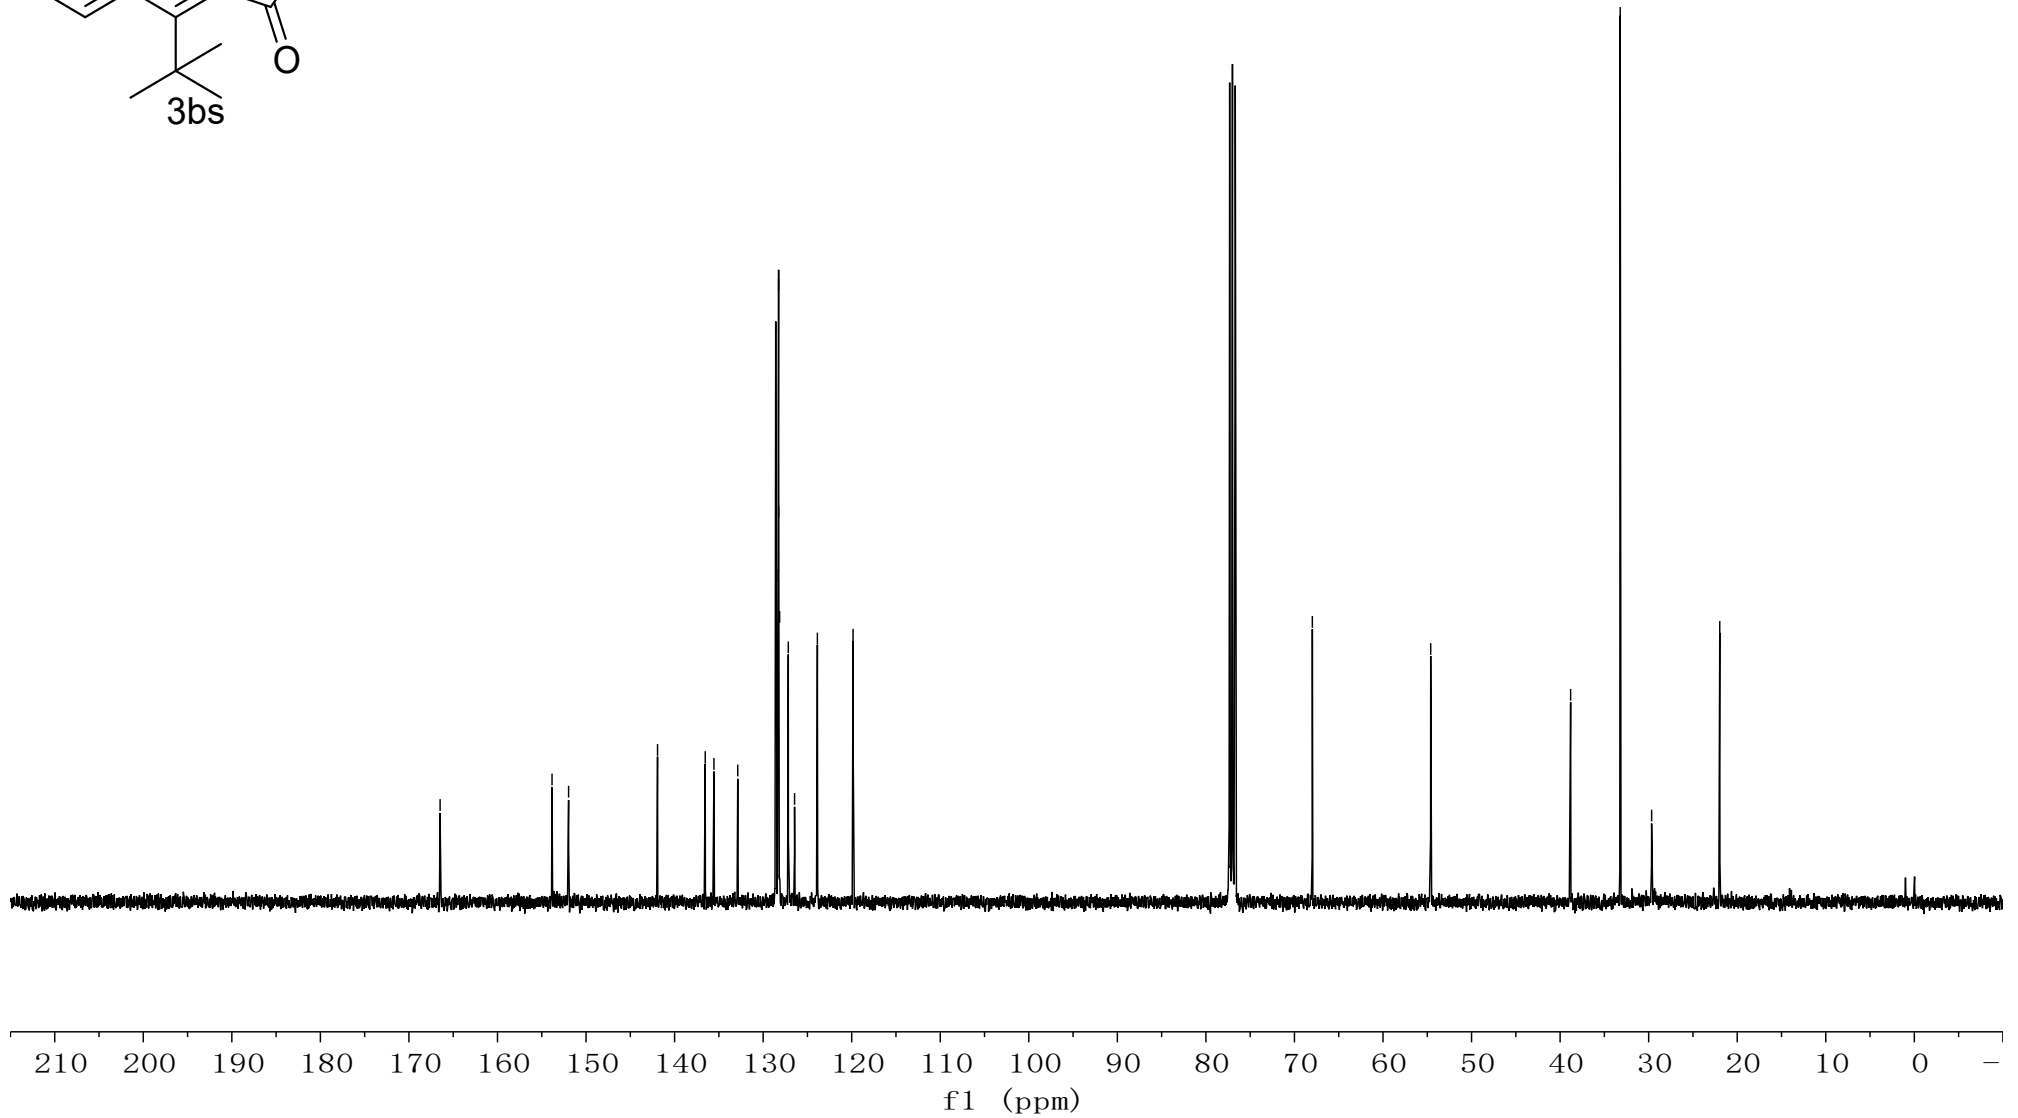

<sup>13</sup>C NMR (100 MHz, CDCl<sub>3</sub>) spectra of **3bs**.



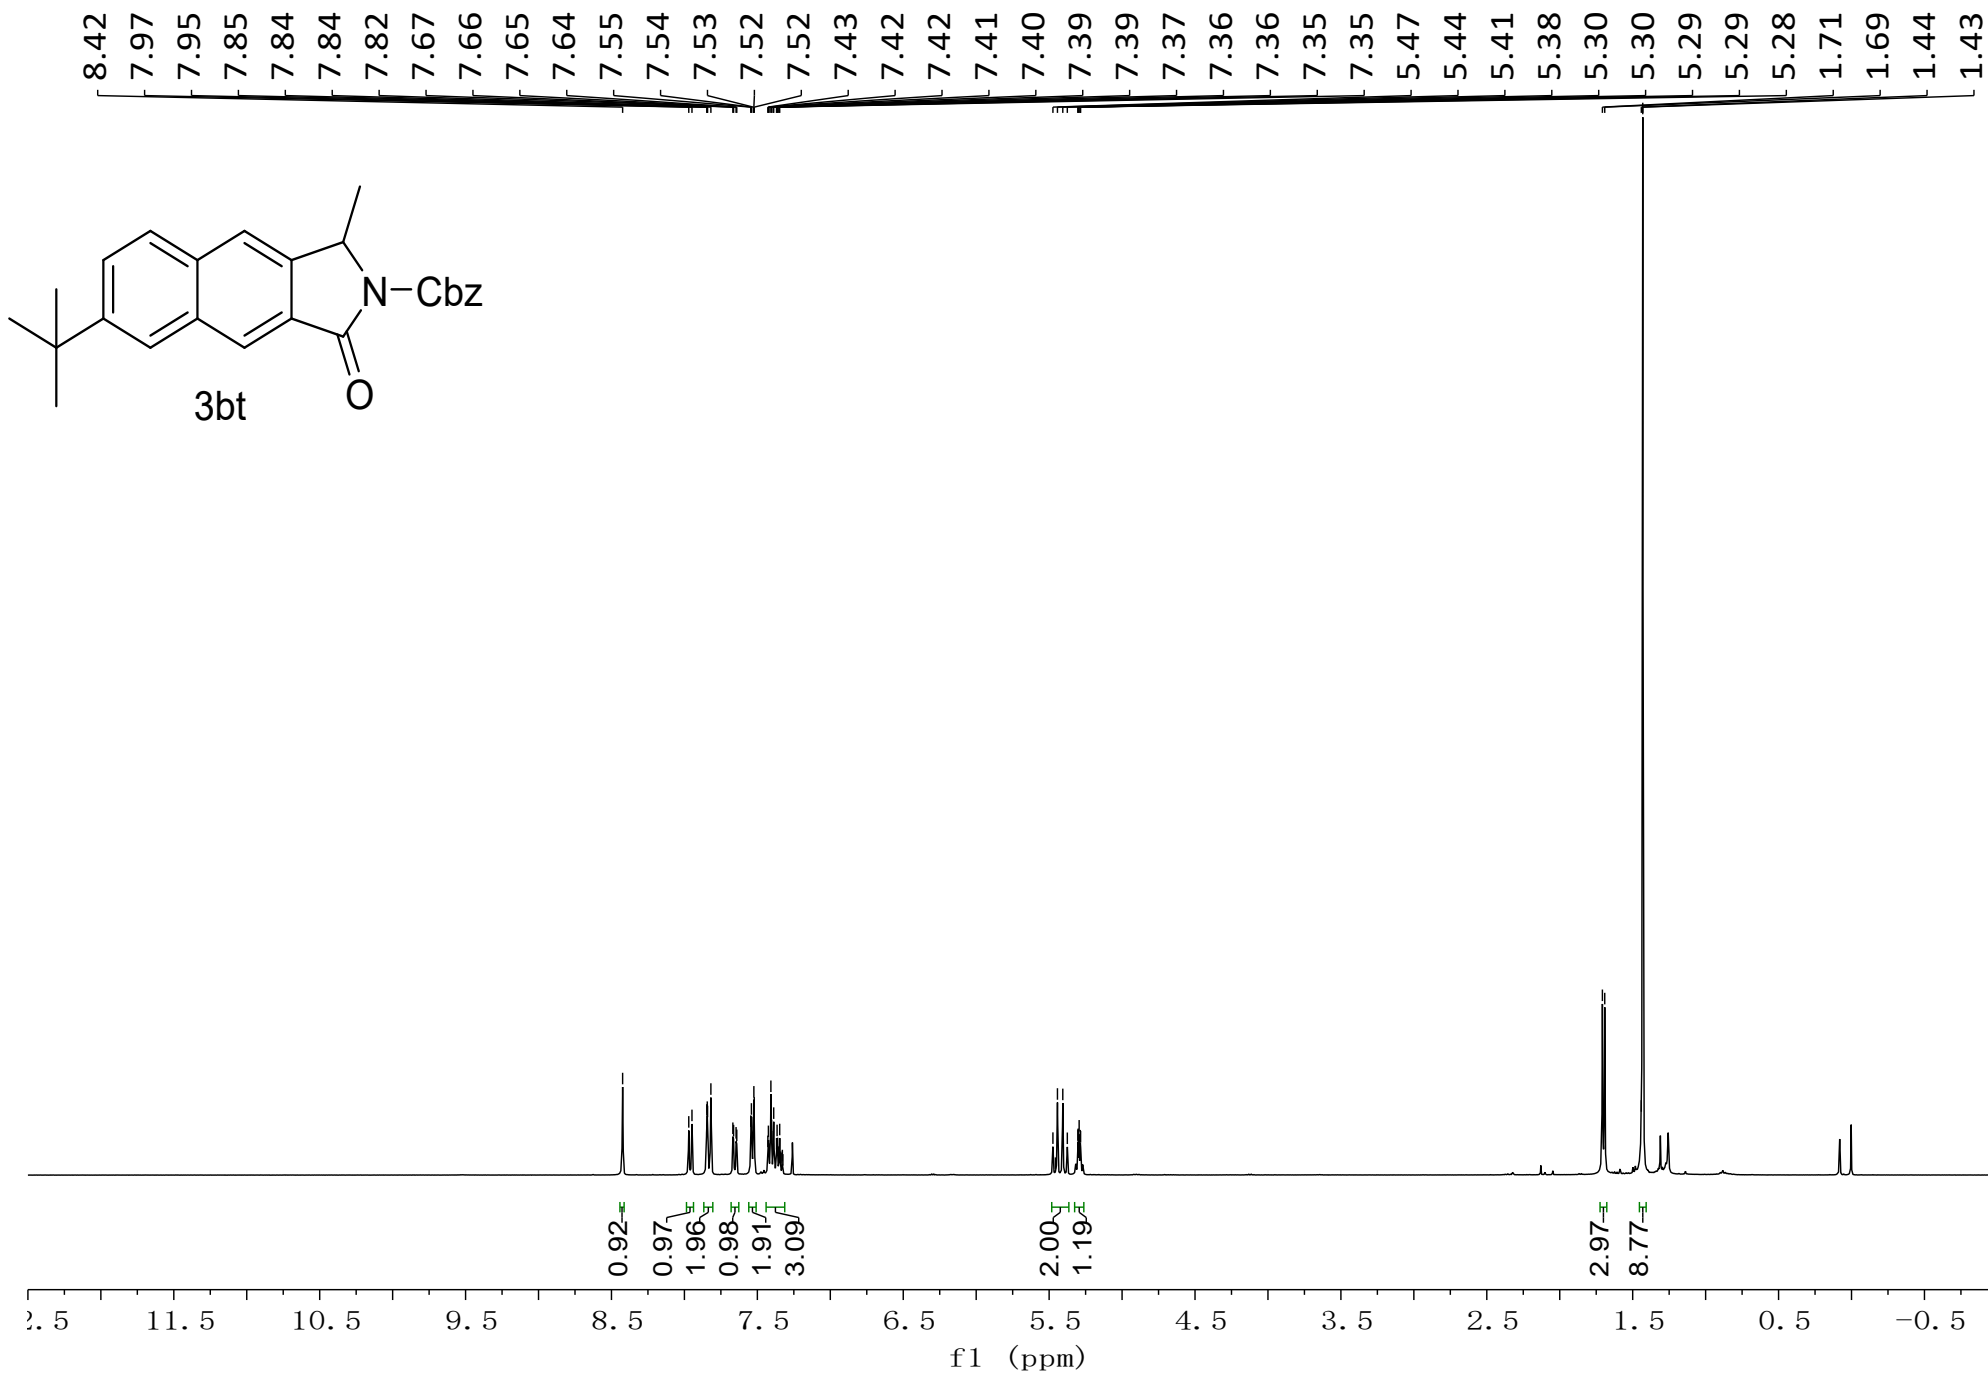

<sup>1</sup>H NMR (400 MHz, CDCl<sub>3</sub>) spectra of **3bt**.

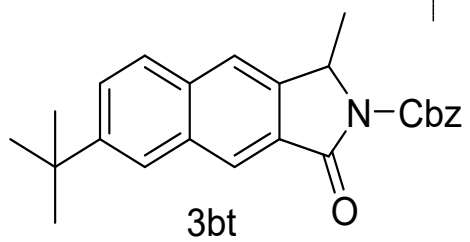

- 166.4
- 151.8
- 151.7
- 141.3
- 136.5
- 135.4
- 131.2
- 129.4
- 128.6
- 128.3
- 128.1
- 127.0
- 125.8
- 125.6
- 123.0
- 121.1
- 77.0
- 68.1
- 56.4
- 35.1
- 31.0
- 21.2

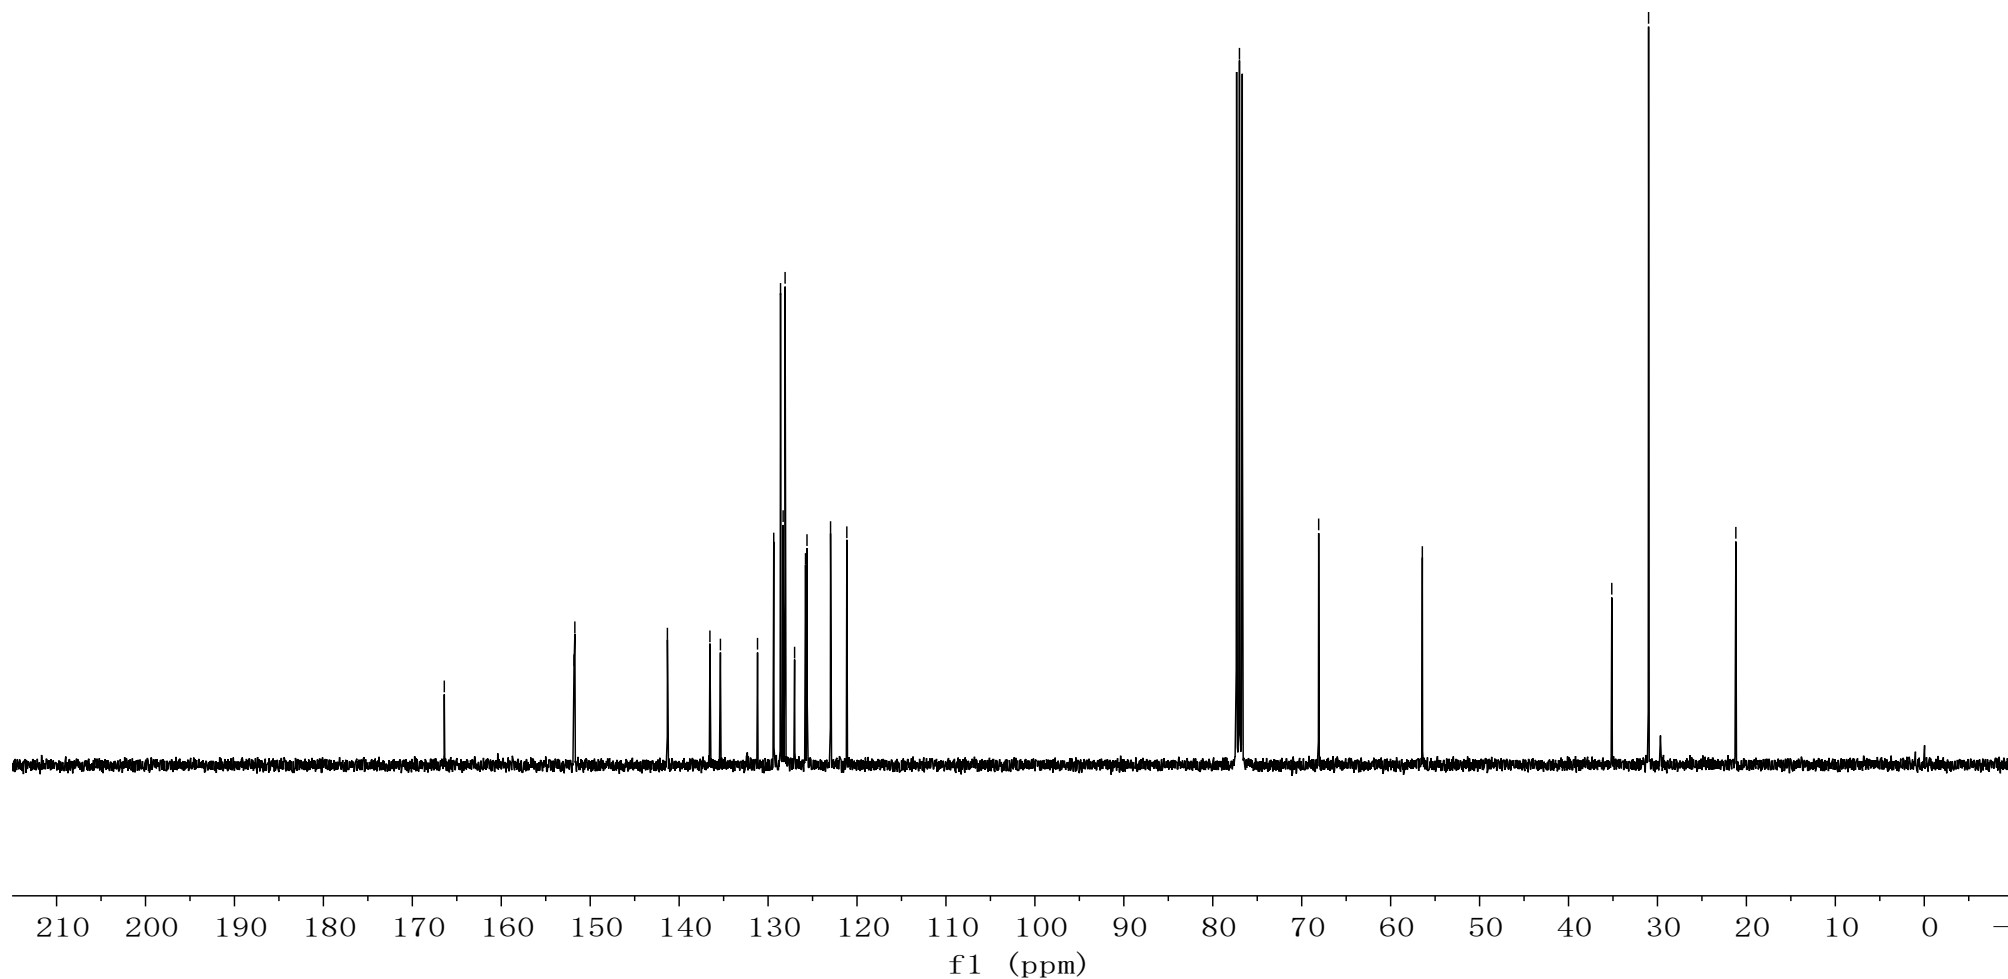

<sup>13</sup>C NMR (100 MHz, CDCl<sub>3</sub>) spectra of **3bt**.

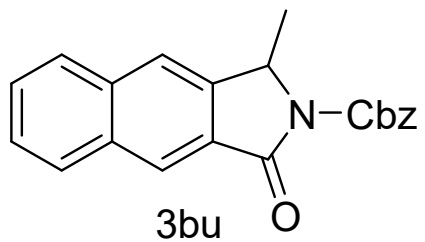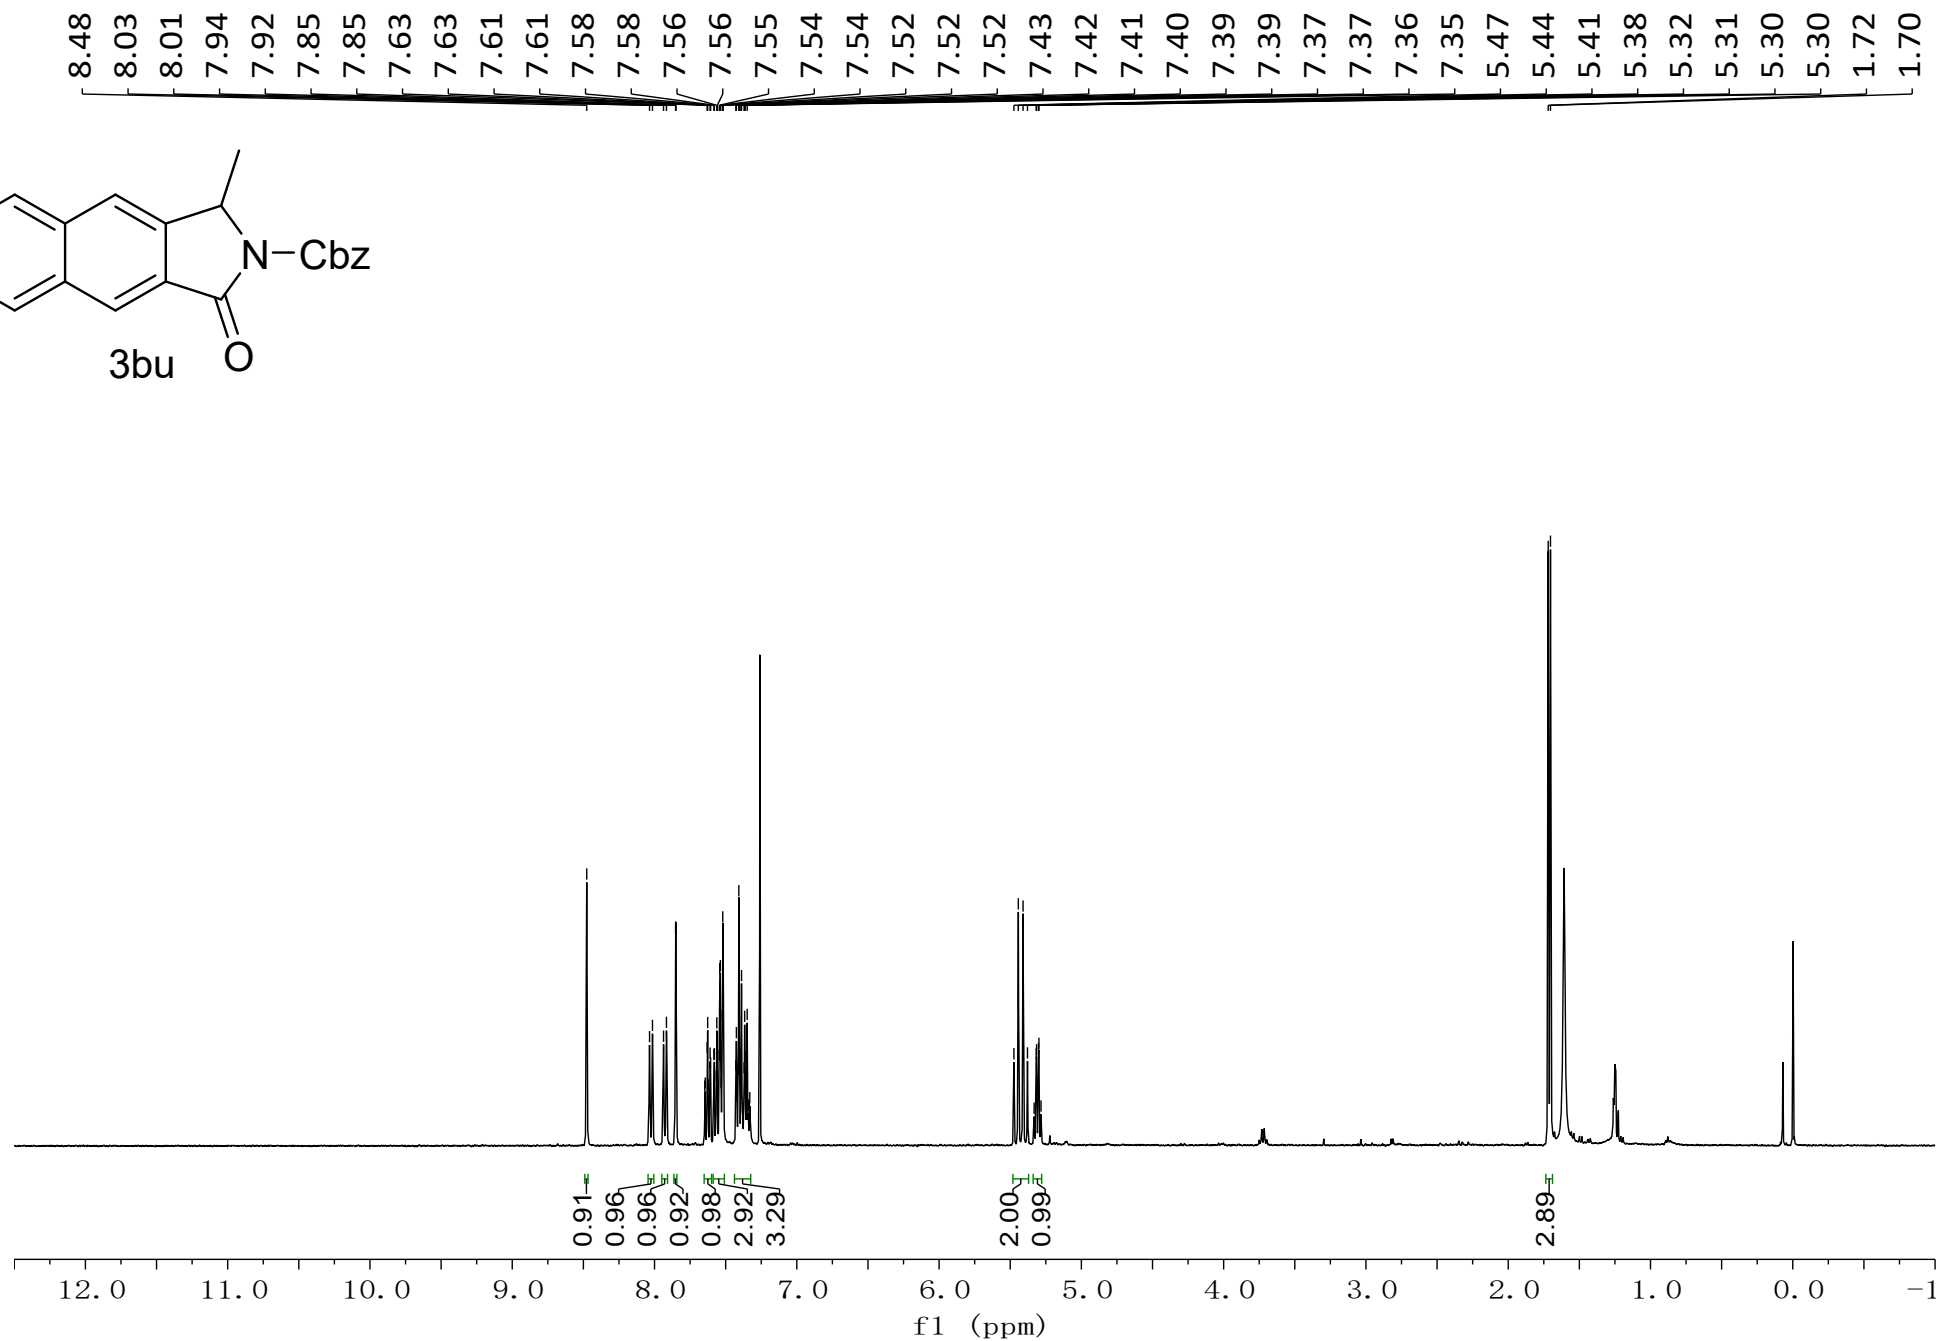

<sup>1</sup>H NMR (400 MHz, CDCl<sub>3</sub>) spectra of **3bu**.

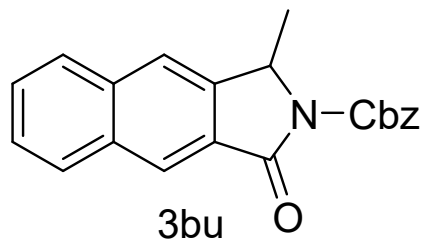

— 152.0  
/ 141.5  
/ 136.6  
/ 135.6  
/ 133.1  
/ 130.0  
/ 128.8  
/ 128.8  
/ 128.6  
/ 128.3  
/ 128.3  
/ 127.9  
/ 126.9  
/ 126.4  
/ 121.5  
— 68.4  
— 56.7  
— 21.4

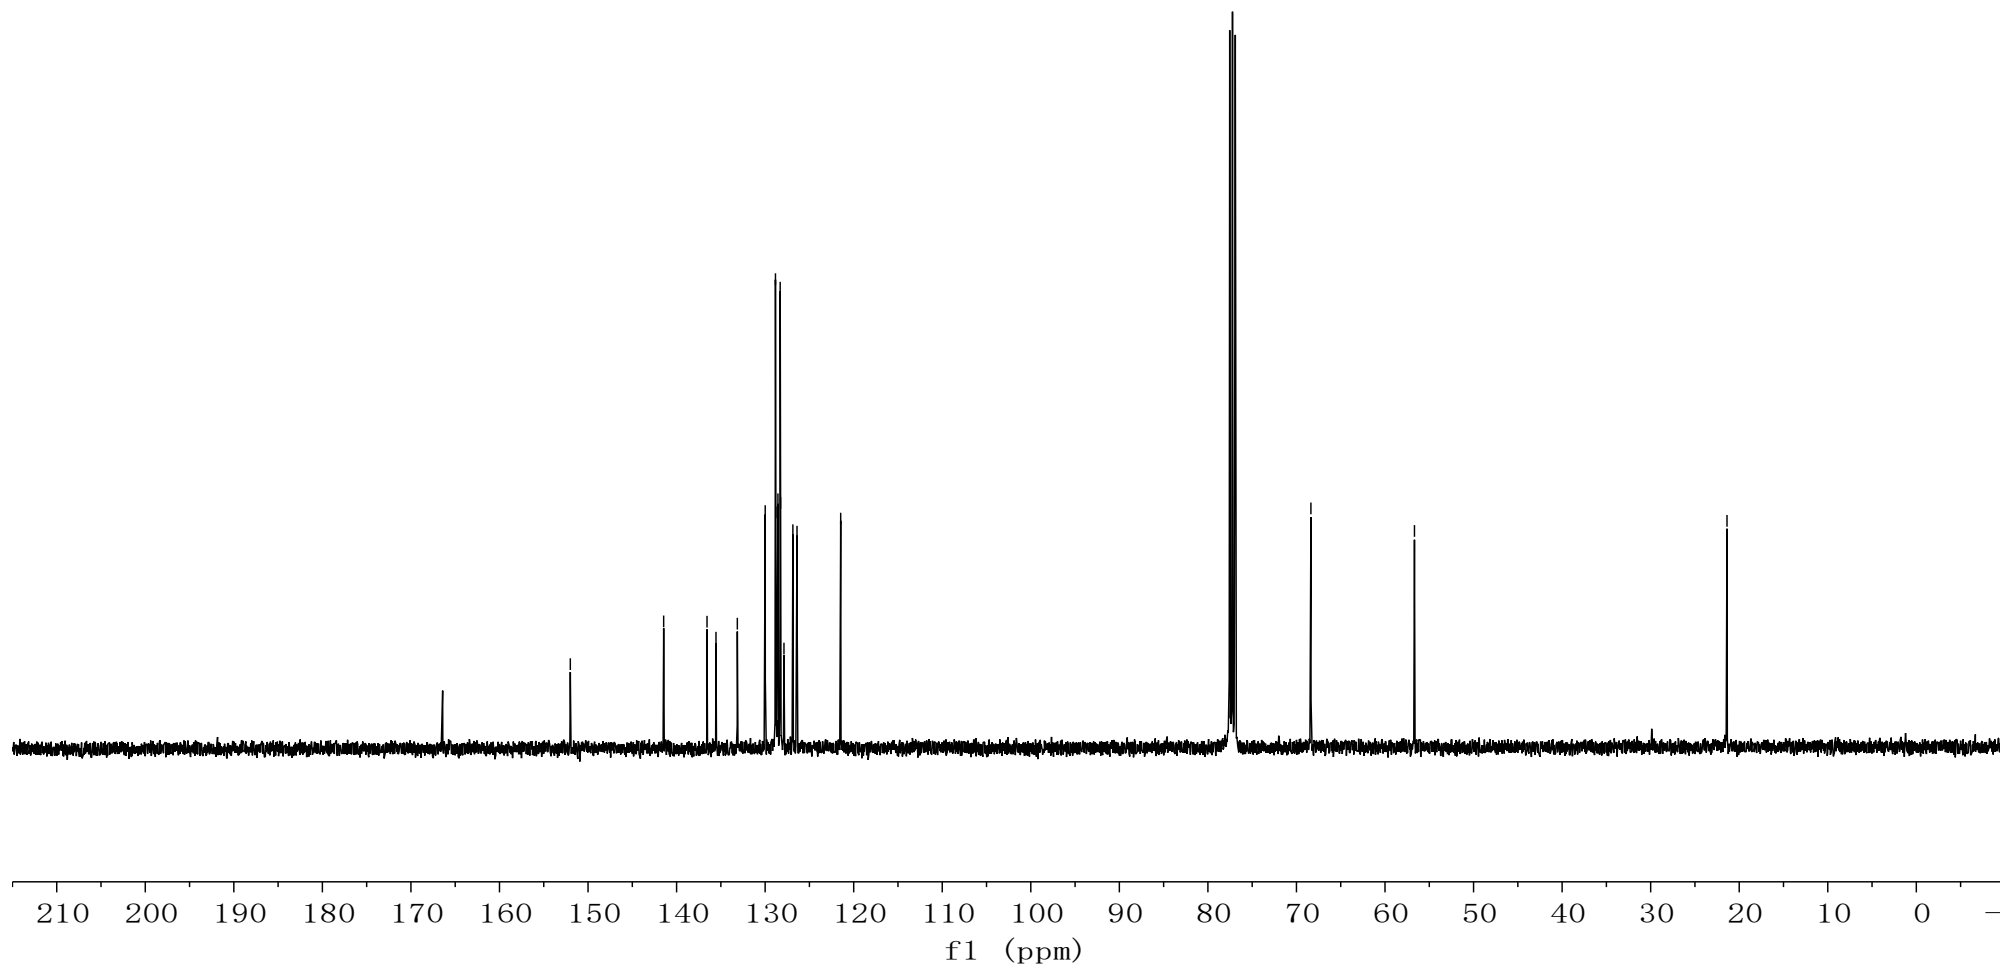

<sup>13</sup>C NMR (100 MHz, CDCl<sub>3</sub>) spectra of **3bu**.

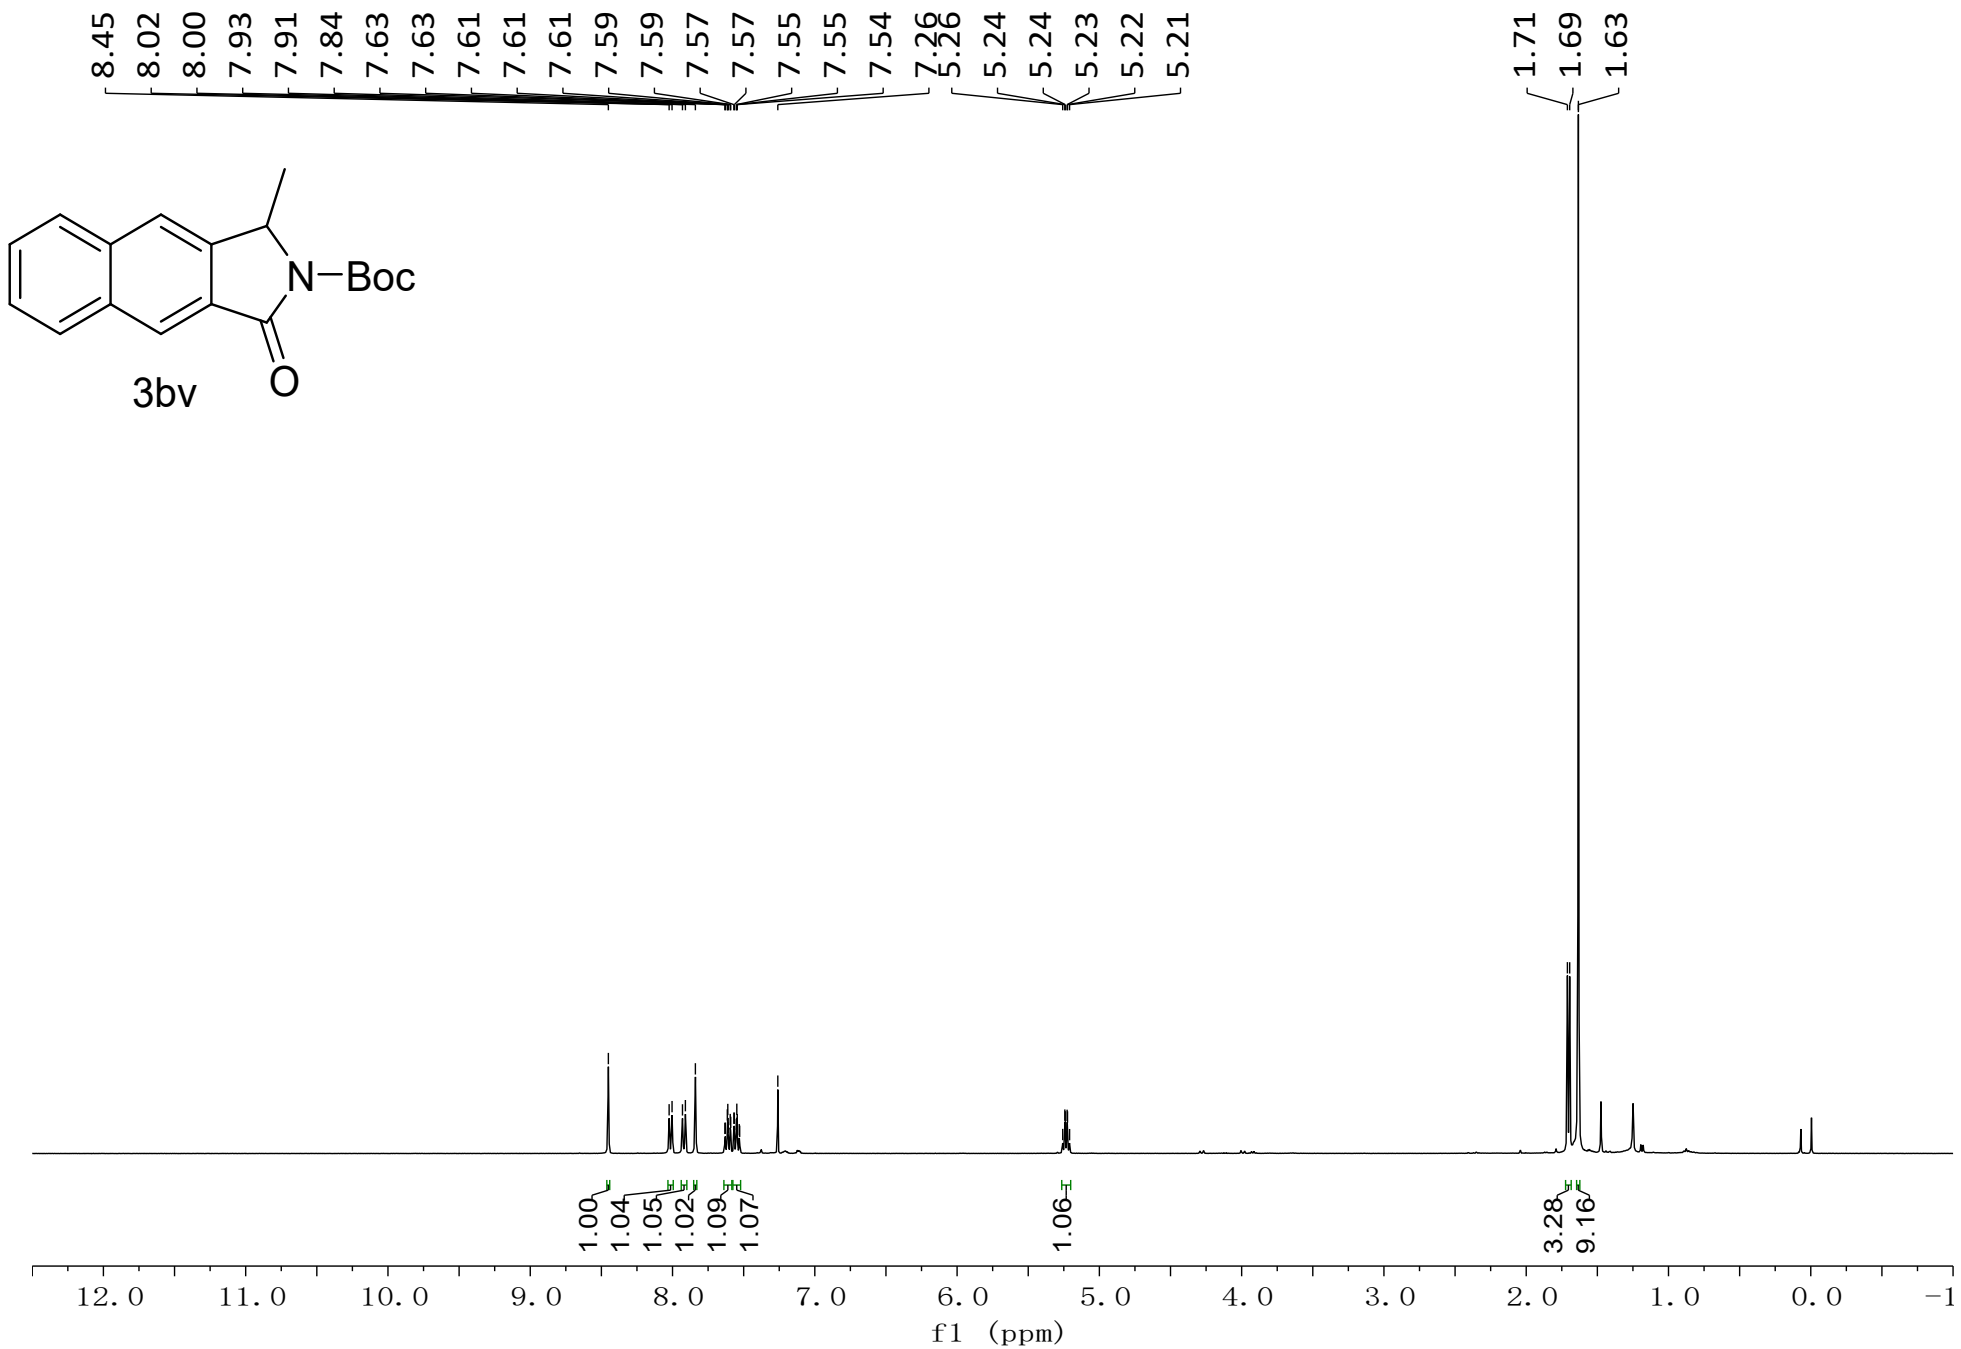

<sup>1</sup>H NMR (400 MHz, CDCl<sub>3</sub>) spectra of **3bv**.

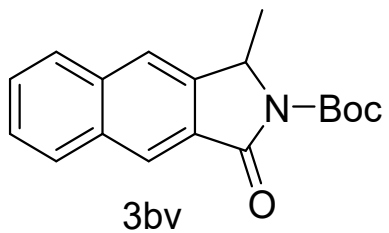

— 166.5  
— 150.3  
— 141.3  
— 136.3  
— 133.0  
— 129.8  
— 128.4  
— 128.2  
— 128.0  
— 126.5  
— 125.9  
— 121.1

— 83.1  
— 77.0

— 56.3

— 28.2  
— 21.3

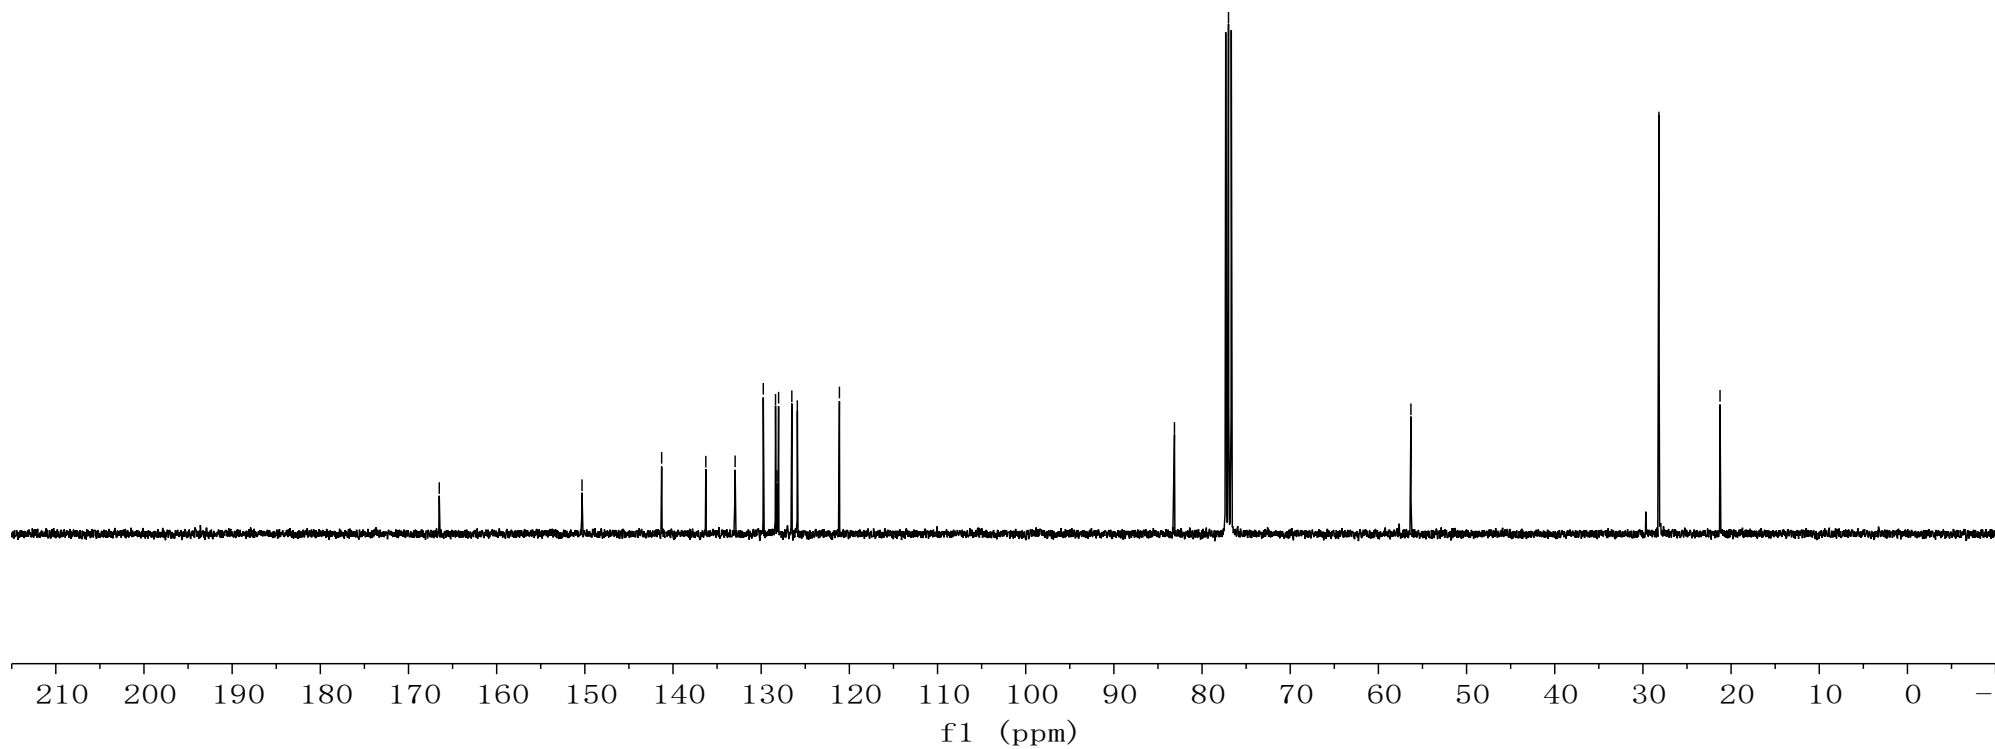

<sup>13</sup>C NMR (100 MHz, CDCl<sub>3</sub>) spectra of **3bv**.

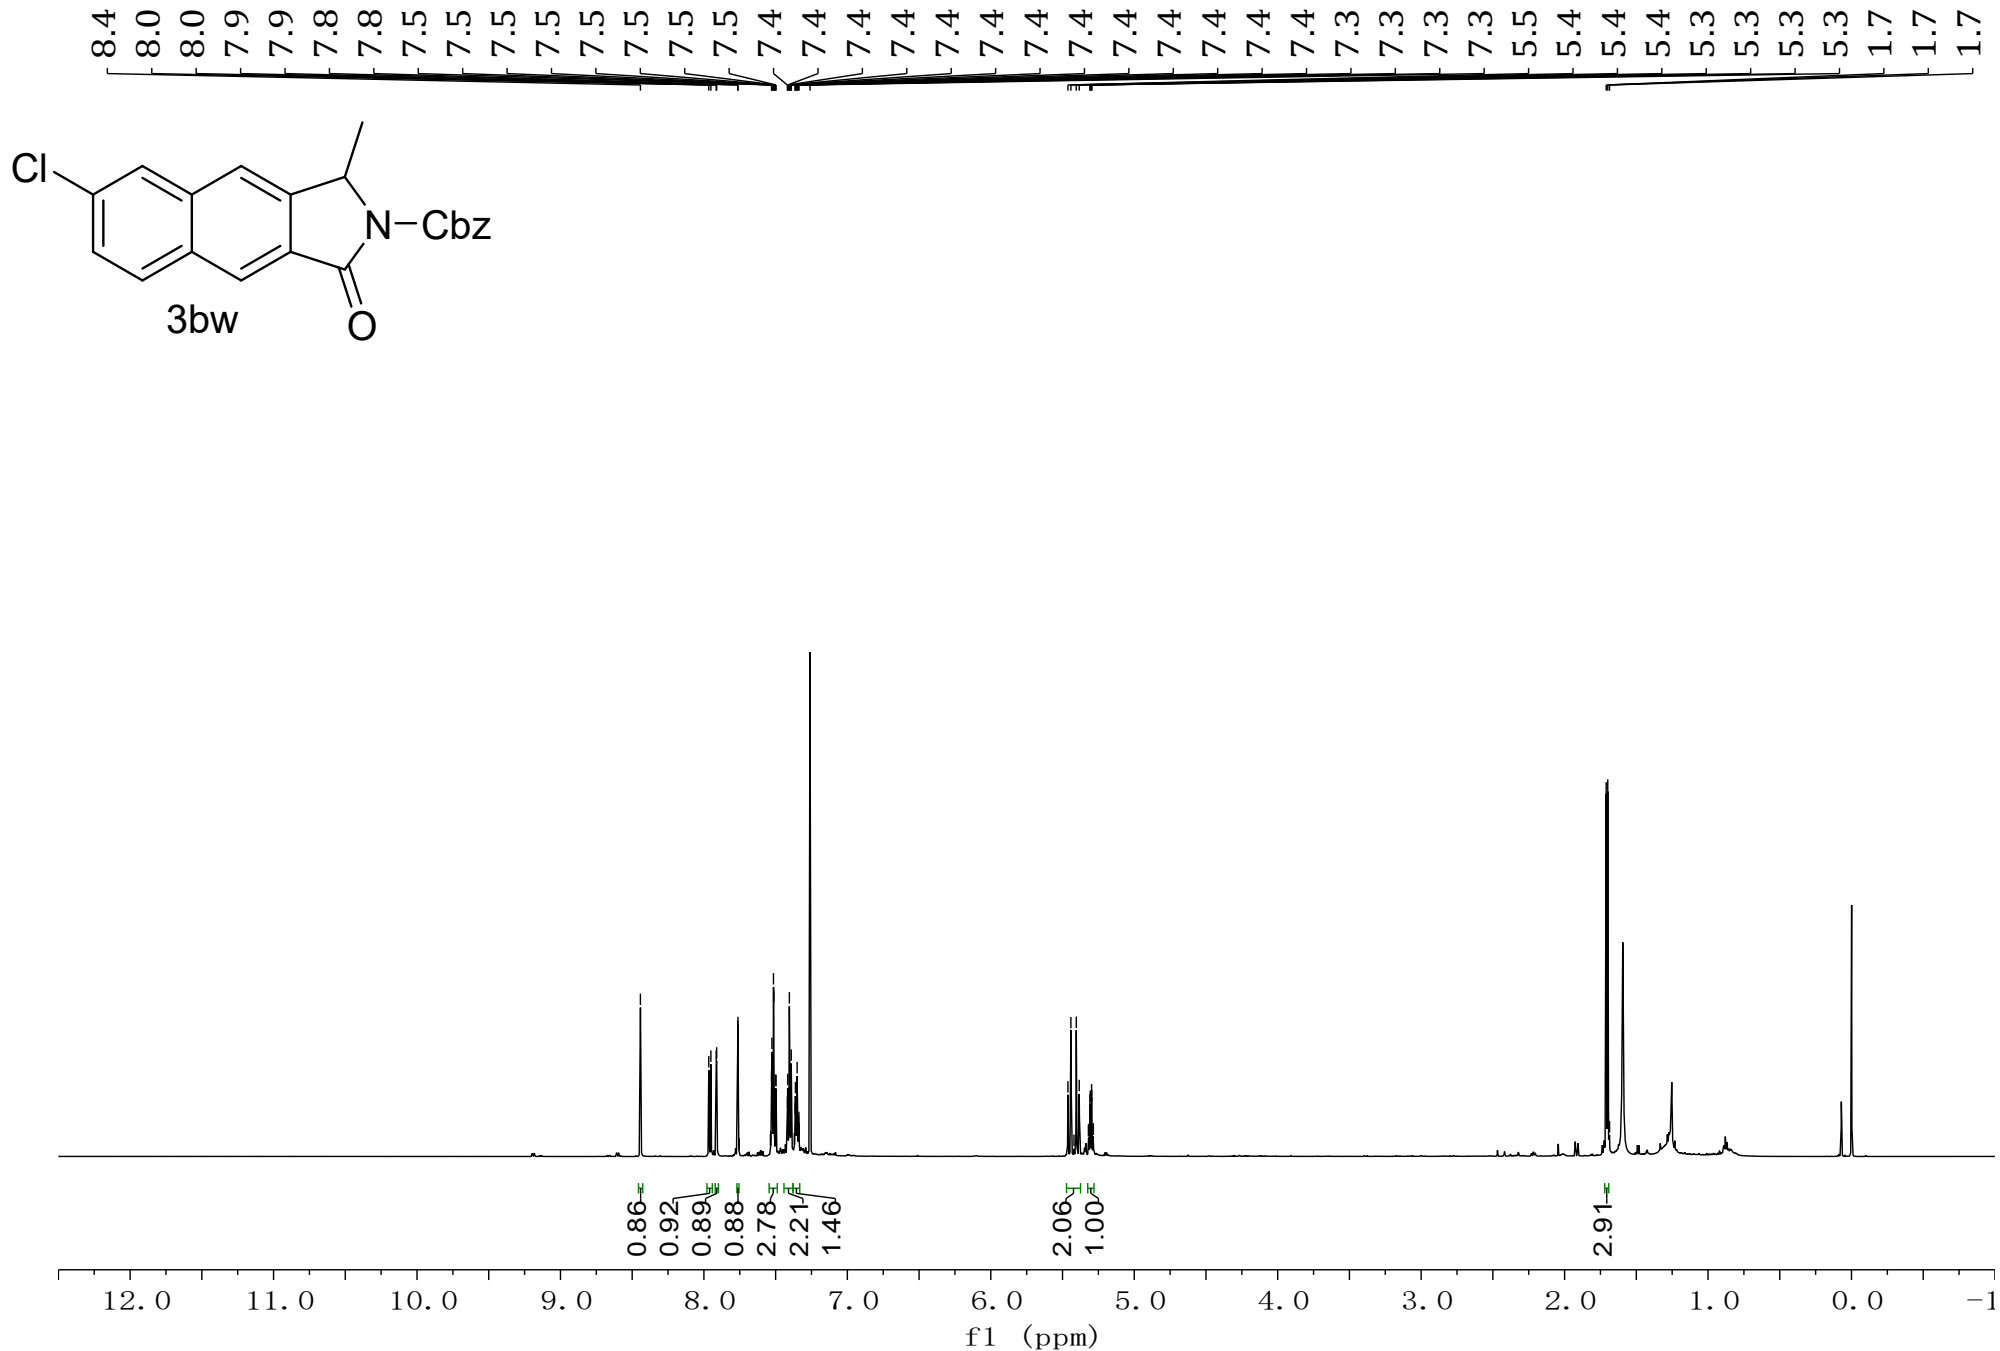

<sup>1</sup>H NMR (600 MHz, CDCl<sub>3</sub>) spectra of **3bw**.

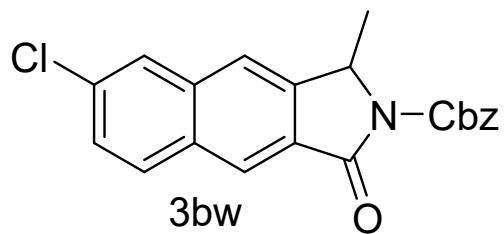

165.8  
151.7  
142.5  
136.9  
135.3  
134.7  
131.2  
131.2  
128.7  
128.4  
128.1  
128.1  
127.8  
126.8  
126.2  
120.5

77.0

68.3

56.5

21.1

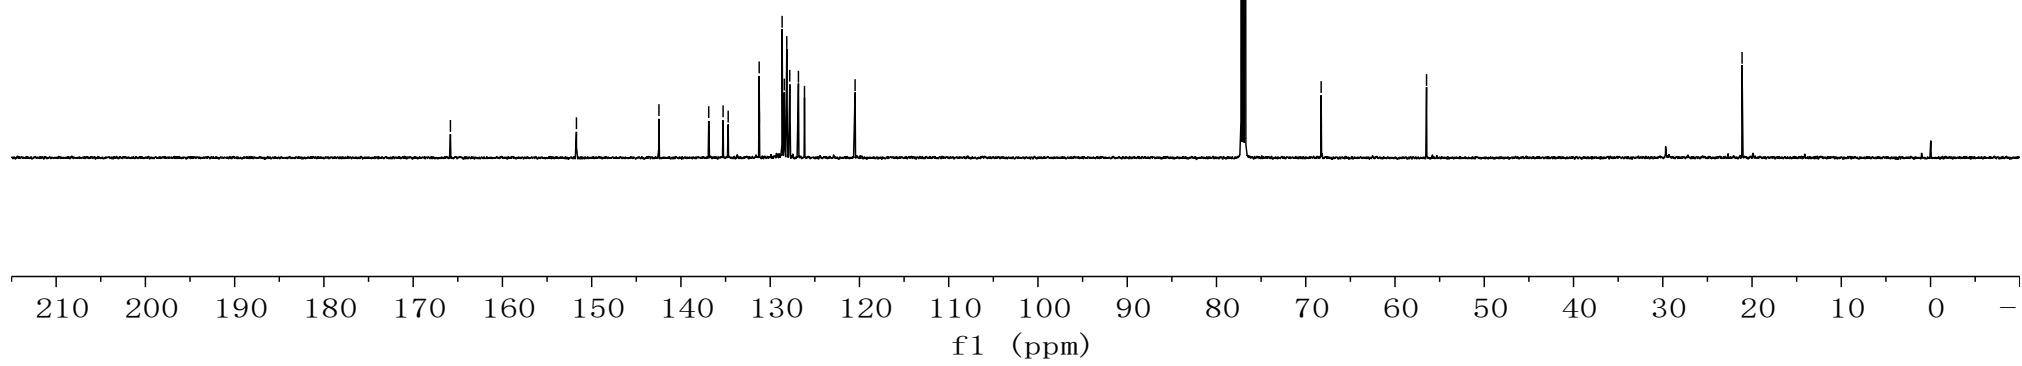

<sup>13</sup>C NMR (150 MHz, CDCl<sub>3</sub>) spectra of **3bw**.



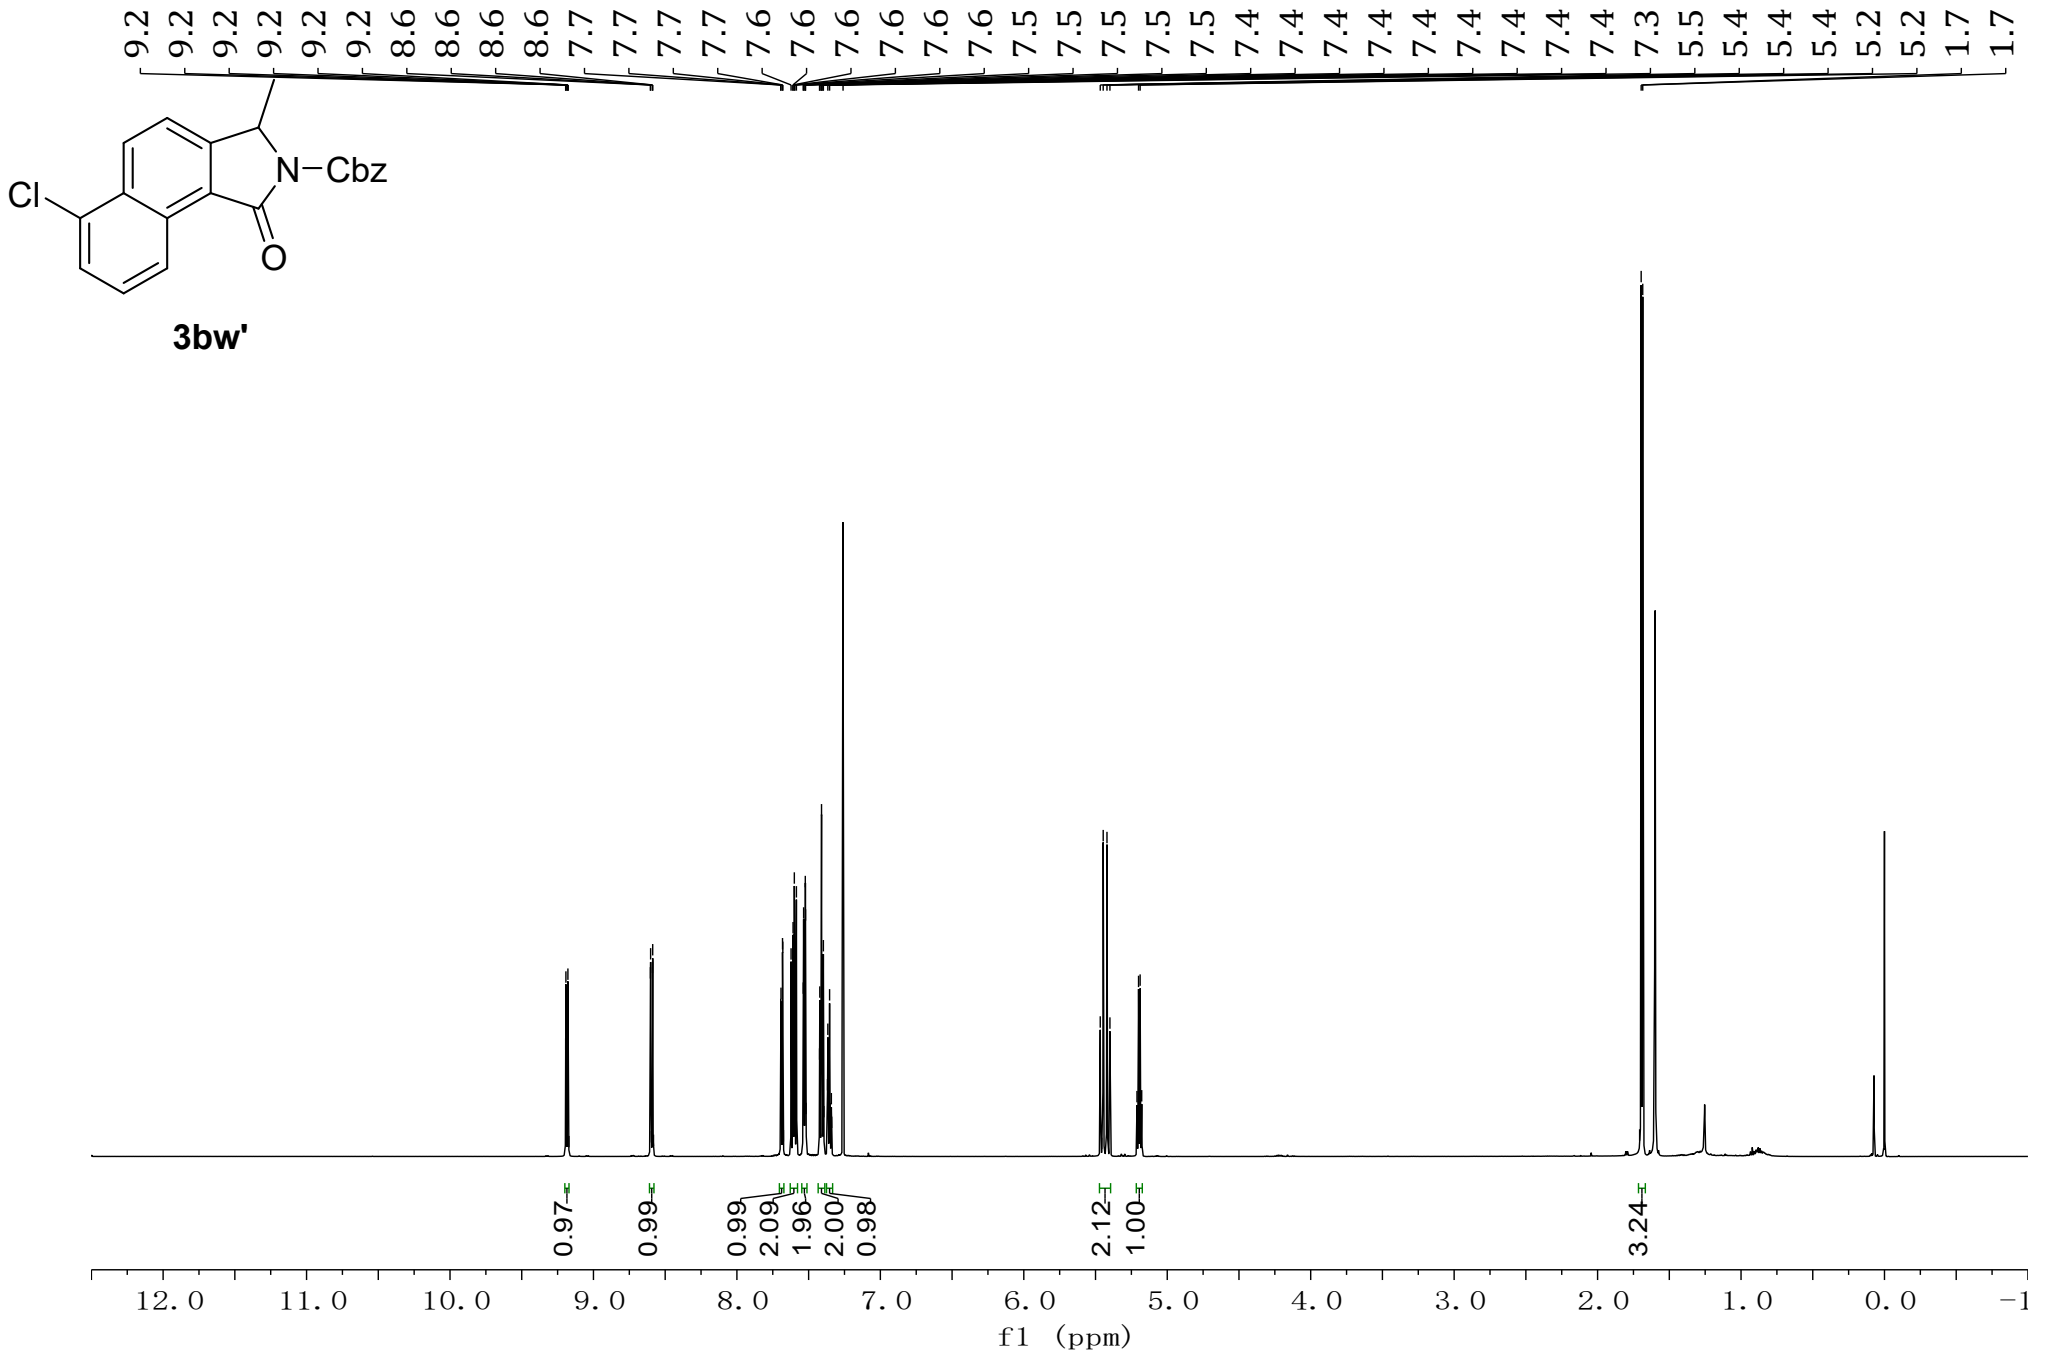

<sup>1</sup>H NMR (600 MHz, CDCl<sub>3</sub>) spectra of **3bw'**.

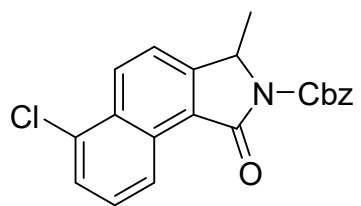

**3bw'**

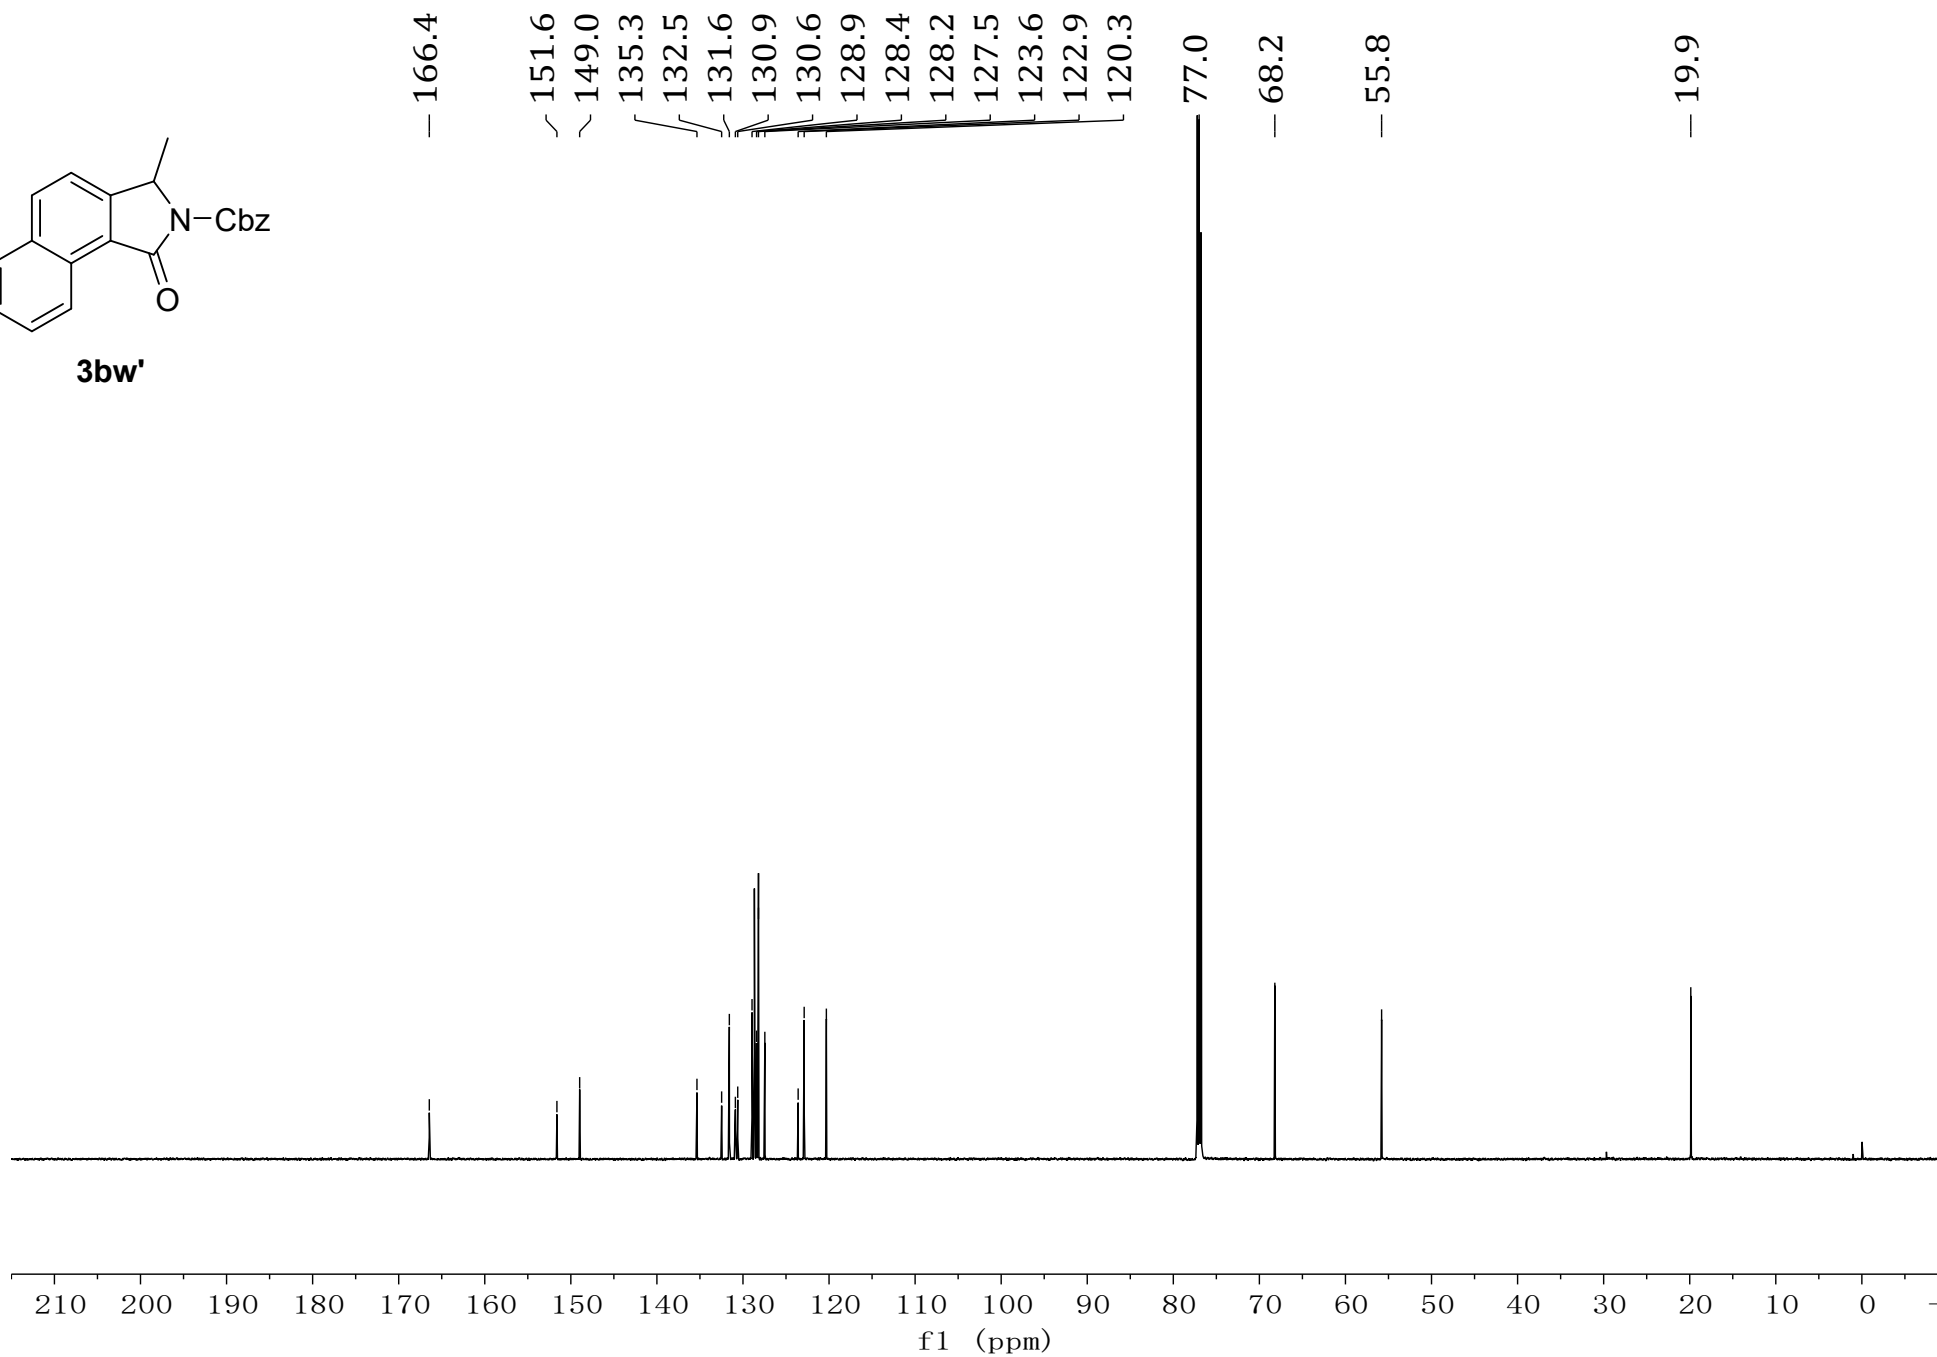

<sup>13</sup>C NMR (150 MHz, CDCl<sub>3</sub>) spectra of **3bw'**.

## X-ray Crystal Structure and Details of Compound 3aa

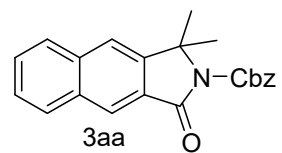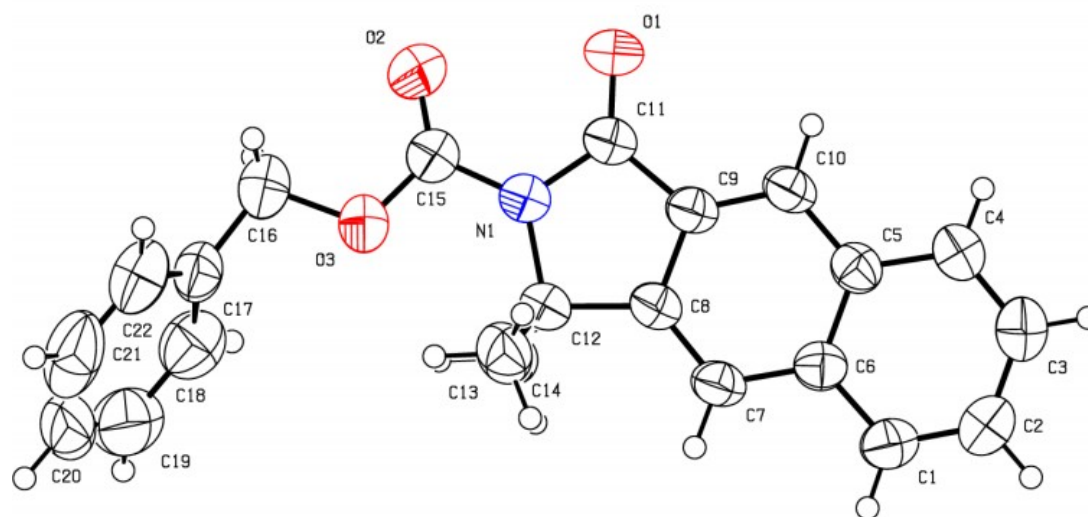

Table 1. Crystal data and structure refinement for 3a.

|                                   |                                                  |                       |
|-----------------------------------|--------------------------------------------------|-----------------------|
| Identification code               | 1_a                                              |                       |
| Empirical formula                 | C <sub>22</sub> H <sub>19</sub> N O <sub>3</sub> |                       |
| Formula weight                    | 345.38                                           |                       |
| Temperature                       | 293(2) K                                         |                       |
| Wavelength                        | 1.54178 Å                                        |                       |
| Crystal system                    | Monoclinic                                       |                       |
| Space group                       | P2 <sub>1</sub> /n                               |                       |
| Unit cell dimensions              | a = 9.7838(2) Å                                  | $\alpha = 90^\circ$ . |
| b = 9.39690(10) Å                 | $\beta = 95.2820(10)^\circ$ .                    |                       |
| c = 19.7446(3) Å                  | $\gamma = 90^\circ$ .                            |                       |
| Volume                            | 1807.56(5) Å <sup>3</sup>                        |                       |
| Z                                 | 4                                                |                       |
| Density (calculated)              | 1.269 Mg/m <sup>3</sup>                          |                       |
| Absorption coefficient            | 0.681 mm <sup>-1</sup>                           |                       |
| F(000)                            | 728                                              |                       |
| Crystal size                      | 0.220 x 0.200 x 0.180 mm <sup>3</sup>            |                       |
| Theta range for data collection   | 4.498 to 73.837°.                                |                       |
| Index ranges                      | -12 ≤ h ≤ 12, -11 ≤ k ≤ 11, -24 ≤ l ≤ 24         |                       |
| Reflections collected             | 42473                                            |                       |
| Independent reflections           | 3632 [R(int) = 0.0347]                           |                       |
| Completeness to theta = 67.679°   | 99.9 %                                           |                       |
| Absorption correction             | Semi-empirical from equivalents                  |                       |
| Refinement method                 | Full-matrix least-squares on F <sup>2</sup>      |                       |
| Data / restraints / parameters    | 3632 / 1 / 225                                   |                       |
| Goodness-of-fit on F <sup>2</sup> | 1.075                                            |                       |
| Final R indices [I > 2σ(I)]       | R1 = 0.0732, wR2 = 0.2078                        |                       |
| R indices (all data)              | R1 = 0.0757, wR2 = 0.2115                        |                       |
| Extinction coefficient            | n/a                                              |                       |
| Largest diff. peak and hole       | 0.355 and -0.409 e.Å <sup>-3</sup>               |                       |

Table 2. Atomic coordinates ( $\times 10^4$ ) and equivalent isotropic displacement parameters ( $\text{\AA}^2 \times 10^3$ )for 1\_a.  $U(\text{eq})$  is defined as one third of the trace of the orthogonalized  $U^{ij}$  tensor.

|       | x        | y        | z       | $U(\text{eq})$ |
|-------|----------|----------|---------|----------------|
| C(1)  | 4067(2)  | 9579(2)  | 2008(1) | 59(1)          |
| C(2)  | 3477(2)  | 10886(2) | 1937(1) | 64(1)          |
| C(3)  | 3351(2)  | 11756(2) | 2507(1) | 66(1)          |
| C(4)  | 3755(2)  | 11275(2) | 3142(1) | 59(1)          |
| C(5)  | 4343(2)  | 9899(2)  | 3242(1) | 50(1)          |
| C(6)  | 4549(2)  | 9048(2)  | 2660(1) | 49(1)          |
| C(7)  | 5194(2)  | 7703(2)  | 2744(1) | 53(1)          |
| C(8)  | 5590(2)  | 7222(2)  | 3385(1) | 50(1)          |
| C(9)  | 5330(2)  | 8038(2)  | 3954(1) | 52(1)          |
| C(10) | 4735(2)  | 9353(2)  | 3897(1) | 54(1)          |
| C(11) | 5837(2)  | 7277(2)  | 4577(1) | 63(1)          |
| C(12) | 6322(2)  | 5860(2)  | 3598(1) | 54(1)          |
| C(13) | 5452(3)  | 4571(2)  | 3373(1) | 70(1)          |
| C(14) | 7734(2)  | 5826(3)  | 3323(1) | 74(1)          |
| C(15) | 7016(2)  | 5032(3)  | 4824(1) | 72(1)          |
| C(16) | 8267(4)  | 2904(3)  | 4943(2) | 104(1)         |
| C(17) | 8881(2)  | 1858(2)  | 4497(1) | 67(1)          |
| C(18) | 8051(2)  | 995(2)   | 4060(1) | 85(1)          |
| C(19) | 8640(3)  | -24(2)   | 3667(1) | 123(1)         |
| C(20) | 10058(3) | -179(2)  | 3710(1) | 139(2)         |
| C(21) | 10888(2) | 684(3)   | 4147(1) | 120(2)         |
| C(22) | 10299(2) | 1703(2)  | 4540(1) | 85(1)          |
| N(1)  | 6440(2)  | 6022(2)  | 4360(1) | 60(1)          |
| O(1)  | 5760(2)  | 7642(2)  | 5159(1) | 94(1)          |
| O(2)  | 6969(3)  | 5081(3)  | 5422(1) | 122(1)         |

O(3)

7630(2)

4000(2)

4501(1)

83(1)

---

Table 3. Bond lengths [ $\text{\AA}$ ] and angles [ $^\circ$ ] for 1\_a.

---

|              |          |
|--------------|----------|
| C(1)-C(2)    | 1.359(3) |
| C(1)-C(6)    | 1.420(3) |
| C(1)-H(1)    | 0.9300   |
| C(2)-C(3)    | 1.405(3) |
| C(2)-H(2)    | 0.9300   |
| C(3)-C(4)    | 1.357(3) |
| C(3)-H(3)    | 0.9300   |
| C(4)-C(5)    | 1.422(3) |
| C(4)-H(4)    | 0.9300   |
| C(5)-C(10)   | 1.410(3) |
| C(5)-C(6)    | 1.429(2) |
| C(6)-C(7)    | 1.416(3) |
| C(7)-C(8)    | 1.366(3) |
| C(7)-H(7)    | 0.9300   |
| C(8)-C(9)    | 1.402(2) |
| C(8)-C(12)   | 1.508(2) |
| C(9)-C(10)   | 1.367(3) |
| C(9)-C(11)   | 1.468(3) |
| C(10)-H(10)  | 0.9300   |
| C(11)-O(1)   | 1.209(2) |
| C(11)-N(1)   | 1.403(2) |
| C(12)-N(1)   | 1.507(2) |
| C(12)-C(13)  | 1.523(3) |
| C(12)-C(14)  | 1.530(3) |
| C(13)-H(13A) | 0.9600   |
| C(13)-H(13B) | 0.9600   |
| C(13)-H(13C) | 0.9600   |
| C(14)-H(14A) | 0.9600   |

|                |            |
|----------------|------------|
| C(14)-H(14B)   | 0.9600     |
| C(14)-H(14C)   | 0.9600     |
| C(15)-O(2)     | 1.186(3)   |
| C(15)-O(3)     | 1.333(3)   |
| C(15)-N(1)     | 1.388(3)   |
| C(16)-O(3)     | 1.452(3)   |
| C(16)-C(17)    | 1.483(3)   |
| C(16)-H(16A)   | 0.9700     |
| C(16)-H(16B)   | 0.9700     |
| C(17)-C(18)    | 1.3900     |
| C(17)-C(22)    | 1.3900     |
| C(18)-C(19)    | 1.3900     |
| C(18)-H(18)    | 0.9300     |
| C(19)-C(20)    | 1.3900     |
| C(19)-H(19)    | 0.9300     |
| C(20)-C(21)    | 1.3900     |
| C(20)-H(20)    | 0.9300     |
| C(21)-C(22)    | 1.3900     |
| C(21)-H(21)    | 0.9300     |
| C(22)-H(22)    | 0.9300     |
| <br>           |            |
| C(2)-C(1)-C(6) | 120.91(18) |
| C(2)-C(1)-H(1) | 119.5      |
| C(6)-C(1)-H(1) | 119.5      |
| C(1)-C(2)-C(3) | 120.68(19) |
| C(1)-C(2)-H(2) | 119.7      |
| C(3)-C(2)-H(2) | 119.7      |
| C(4)-C(3)-C(2) | 120.45(19) |
| C(4)-C(3)-H(3) | 119.8      |
| C(2)-C(3)-H(3) | 119.8      |



|                   |            |
|-------------------|------------|
| C(3)-C(4)-C(5)    | 120.73(19) |
| C(3)-C(4)-H(4)    | 119.6      |
| C(5)-C(4)-H(4)    | 119.6      |
| C(10)-C(5)-C(4)   | 122.02(16) |
| C(10)-C(5)-C(6)   | 119.15(16) |
| C(4)-C(5)-C(6)    | 118.82(17) |
| C(7)-C(6)-C(1)    | 121.80(16) |
| C(7)-C(6)-C(5)    | 119.95(16) |
| C(1)-C(6)-C(5)    | 118.23(17) |
| C(8)-C(7)-C(6)    | 119.28(15) |
| C(8)-C(7)-H(7)    | 120.4      |
| C(6)-C(7)-H(7)    | 120.4      |
| C(7)-C(8)-C(9)    | 120.34(17) |
| C(7)-C(8)-C(12)   | 128.73(15) |
| C(9)-C(8)-C(12)   | 110.94(15) |
| C(10)-C(9)-C(8)   | 122.32(17) |
| C(10)-C(9)-C(11)  | 128.21(16) |
| C(8)-C(9)-C(11)   | 109.43(16) |
| C(9)-C(10)-C(5)   | 118.86(16) |
| C(9)-C(10)-H(10)  | 120.6      |
| C(5)-C(10)-H(10)  | 120.6      |
| O(1)-C(11)-N(1)   | 126.4(2)   |
| O(1)-C(11)-C(9)   | 127.75(19) |
| N(1)-C(11)-C(9)   | 105.85(15) |
| N(1)-C(12)-C(8)   | 100.55(13) |
| N(1)-C(12)-C(13)  | 111.12(16) |
| C(8)-C(12)-C(13)  | 110.86(16) |
| N(1)-C(12)-C(14)  | 111.57(17) |
| C(8)-C(12)-C(14)  | 109.92(16) |
| C(13)-C(12)-C(14) | 112.24(17) |

|                     |            |
|---------------------|------------|
| C(12)-C(13)-H(13A)  | 109.5      |
| C(12)-C(13)-H(13B)  | 109.5      |
| H(13A)-C(13)-H(13B) | 109.5      |
| C(12)-C(13)-H(13C)  | 109.5      |
| H(13A)-C(13)-H(13C) | 109.5      |
| H(13B)-C(13)-H(13C) | 109.5      |
| C(12)-C(14)-H(14A)  | 109.5      |
| C(12)-C(14)-H(14B)  | 109.5      |
| H(14A)-C(14)-H(14B) | 109.5      |
| C(12)-C(14)-H(14C)  | 109.5      |
| H(14A)-C(14)-H(14C) | 109.5      |
| H(14B)-C(14)-H(14C) | 109.5      |
| O(2)-C(15)-O(3)     | 124.3(2)   |
| O(2)-C(15)-N(1)     | 125.5(2)   |
| O(3)-C(15)-N(1)     | 110.22(18) |
| O(3)-C(16)-C(17)    | 106.8(2)   |
| O(3)-C(16)-H(16A)   | 110.4      |
| C(17)-C(16)-H(16A)  | 110.4      |
| O(3)-C(16)-H(16B)   | 110.4      |
| C(17)-C(16)-H(16B)  | 110.4      |
| H(16A)-C(16)-H(16B) | 108.6      |
| C(18)-C(17)-C(22)   | 120.0      |
| C(18)-C(17)-C(16)   | 120.6(2)   |
| C(22)-C(17)-C(16)   | 119.3(2)   |
| C(17)-C(18)-C(19)   | 120.0      |
| C(17)-C(18)-H(18)   | 120.0      |
| C(19)-C(18)-H(18)   | 120.0      |
| C(20)-C(19)-C(18)   | 120.0      |
| C(20)-C(19)-H(19)   | 120.0      |
| C(18)-C(19)-H(19)   | 120.0      |

|                   |            |
|-------------------|------------|
| C(21)-C(20)-C(19) | 120.0      |
| C(21)-C(20)-H(20) | 120.0      |
| C(19)-C(20)-H(20) | 120.0      |
| C(20)-C(21)-C(22) | 120.0      |
| C(20)-C(21)-H(21) | 120.0      |
| C(22)-C(21)-H(21) | 120.0      |
| C(21)-C(22)-C(17) | 120.0      |
| C(21)-C(22)-H(22) | 120.0      |
| C(17)-C(22)-H(22) | 120.0      |
| C(15)-N(1)-C(11)  | 121.24(17) |
| C(15)-N(1)-C(12)  | 125.50(16) |
| C(11)-N(1)-C(12)  | 113.18(15) |
| C(15)-O(3)-C(16)  | 114.63(18) |

---

Symmetry transformations used to generate equivalent atoms:

Table 4. Anisotropic displacement parameters ( $\text{\AA}^2 \times 10^3$ ) for 1\_a. The anisotropic displacement factor exponent takes the form:  $-2\pi^2 [ h^2 a^{*2} U^{11} + \dots + 2 h k a^* b^* U^{12} ]$

|       | U <sup>11</sup> | U <sup>22</sup> | U <sup>33</sup> | U <sup>23</sup> | U <sup>13</sup> | U <sup>12</sup> |
|-------|-----------------|-----------------|-----------------|-----------------|-----------------|-----------------|
| C(1)  | 66(1)           | 62(1)           | 49(1)           | -1(1)           | 3(1)            | -7(1)           |
| C(2)  | 62(1)           | 69(1)           | 62(1)           | 12(1)           | 0(1)            | -2(1)           |
| C(3)  | 60(1)           | 60(1)           | 78(1)           | 8(1)            | 6(1)            | 7(1)            |
| C(4)  | 59(1)           | 54(1)           | 65(1)           | -4(1)           | 9(1)            | 6(1)            |
| C(5)  | 46(1)           | 49(1)           | 54(1)           | -6(1)           | 5(1)            | -1(1)           |
| C(6)  | 49(1)           | 50(1)           | 49(1)           | -3(1)           | 4(1)            | -6(1)           |
| C(7)  | 63(1)           | 51(1)           | 46(1)           | -10(1)          | 8(1)            | -2(1)           |
| C(8)  | 54(1)           | 47(1)           | 48(1)           | -8(1)           | 7(1)            | 0(1)            |
| C(9)  | 57(1)           | 54(1)           | 46(1)           | -9(1)           | 4(1)            | 3(1)            |
| C(10) | 60(1)           | 54(1)           | 49(1)           | -13(1)          | 6(1)            | 5(1)            |
| C(11) | 76(1)           | 62(1)           | 49(1)           | -10(1)          | 1(1)            | 14(1)           |
| C(12) | 65(1)           | 52(1)           | 47(1)           | -6(1)           | 8(1)            | 8(1)            |
| C(13) | 94(2)           | 51(1)           | 63(1)           | -6(1)           | 4(1)            | 1(1)            |
| C(14) | 76(1)           | 72(1)           | 76(1)           | 4(1)            | 23(1)           | 19(1)           |
| C(15) | 88(2)           | 72(1)           | 55(1)           | 1(1)            | 3(1)            | 24(1)           |
| C(16) | 144(3)          | 94(2)           | 74(2)           | 15(1)           | 7(2)            | 58(2)           |
| C(17) | 78(1)           | 59(1)           | 65(1)           | 16(1)           | 9(1)            | 15(1)           |
| C(18) | 86(2)           | 84(2)           | 85(2)           | 13(1)           | 2(1)            | -11(1)          |
| C(19) | 220(3)          | 62(2)           | 85(2)           | 7(1)            | 0(2)            | -11(2)          |
| C(20) | 245(4)          | 104(3)          | 77(2)           | 35(2)           | 64(3)           | 93(3)           |
| C(21) | 97(2)           | 153(3)          | 119(3)          | 69(2)           | 51(2)           | 60(2)           |
| C(22) | 79(2)           | 80(2)           | 92(2)           | 28(1)           | -3(1)           | -3(1)           |
| N(1)  | 72(1)           | 59(1)           | 48(1)           | -5(1)           | 4(1)            | 14(1)           |
| O(1)  | 147(2)          | 89(1)           | 45(1)           | -14(1)          | -1(1)           | 43(1)           |
| O(2)  | 189(2)          | 123(2)          | 53(1)           | 7(1)            | 8(1)            | 81(2)           |

O(3)

113(1)

74(1)

63(1)

7(1)

9(1)

40(1)

---

Table 5. Hydrogen coordinates ( $\times 10^4$ ) and isotropic displacement parameters ( $\text{\AA}^2 \times 10^{-3}$ ) for 1\_a.

| x      | y     | z     | U(eq) |     |
|--------|-------|-------|-------|-----|
| H(1)   | 4158  | 9025  | 1625  | 71  |
| H(2)   | 3152  | 11208 | 1507  | 77  |
| H(3)   | 2989  | 12667 | 2449  | 79  |
| H(4)   | 3646  | 11852 | 3516  | 71  |
| H(7)   | 5346  | 7152  | 2367  | 63  |
| H(10)  | 4591  | 9880  | 4283  | 65  |
| H(13A) | 4624  | 4576  | 3599  | 104 |
| H(13B) | 5959  | 3716  | 3489  | 104 |
| H(13C) | 5225  | 4606  | 2890  | 104 |
| H(14A) | 7627  | 5927  | 2837  | 110 |
| H(14B) | 8175  | 4936  | 3440  | 110 |
| H(14C) | 8285  | 6593  | 3519  | 110 |
| H(16A) | 7587  | 2446  | 5196  | 125 |
| H(16B) | 8970  | 3314  | 5262  | 125 |
| H(18)  | 7102  | 1099  | 4031  | 102 |
| H(19)  | 8084  | -601  | 3375  | 148 |
| H(20)  | 10451 | -860  | 3447  | 167 |
| H(21)  | 11837 | 581   | 4176  | 144 |
| H(22)  | 10854 | 2280  | 4833  | 101 |

Table 6. Torsion angles [°] for 1\_a.

---

|                       |             |
|-----------------------|-------------|
| C(6)-C(1)-C(2)-C(3)   | 1.2(3)      |
| C(1)-C(2)-C(3)-C(4)   | -3.4(3)     |
| C(2)-C(3)-C(4)-C(5)   | 1.6(3)      |
| C(3)-C(4)-C(5)-C(10)  | -178.10(18) |
| C(3)-C(4)-C(5)-C(6)   | 2.3(3)      |
| C(2)-C(1)-C(6)-C(7)   | -178.63(17) |
| C(2)-C(1)-C(6)-C(5)   | 2.6(3)      |
| C(10)-C(5)-C(6)-C(7)  | -2.7(2)     |
| C(4)-C(5)-C(6)-C(7)   | 176.92(15)  |
| C(10)-C(5)-C(6)-C(1)  | 176.05(16)  |
| C(4)-C(5)-C(6)-C(1)   | -4.3(2)     |
| C(1)-C(6)-C(7)-C(8)   | -177.52(16) |
| C(5)-C(6)-C(7)-C(8)   | 1.2(3)      |
| C(6)-C(7)-C(8)-C(9)   | 1.5(3)      |
| C(6)-C(7)-C(8)-C(12)  | -178.07(17) |
| C(7)-C(8)-C(9)-C(10)  | -2.9(3)     |
| C(12)-C(8)-C(9)-C(10) | 176.81(16)  |
| C(7)-C(8)-C(9)-C(11)  | 179.16(17)  |
| C(12)-C(8)-C(9)-C(11) | -1.2(2)     |
| C(8)-C(9)-C(10)-C(5)  | 1.3(3)      |
| C(11)-C(9)-C(10)-C(5) | 178.85(19)  |
| C(4)-C(5)-C(10)-C(9)  | -178.14(16) |
| C(6)-C(5)-C(10)-C(9)  | 1.5(3)      |
| C(10)-C(9)-C(11)-O(1) | 4.0(4)      |
| C(8)-C(9)-C(11)-O(1)  | -178.1(2)   |
| C(10)-C(9)-C(11)-N(1) | -175.83(19) |
| C(8)-C(9)-C(11)-N(1)  | 2.0(2)      |
| C(7)-C(8)-C(12)-N(1)  | 179.55(18)  |

|                         |             |
|-------------------------|-------------|
| C(9)-C(8)-C(12)-N(1)    | -0.1(2)     |
| C(7)-C(8)-C(12)-C(13)   | -62.9(2)    |
| C(9)-C(8)-C(12)-C(13)   | 117.51(18)  |
| C(7)-C(8)-C(12)-C(14)   | 61.8(3)     |
| C(9)-C(8)-C(12)-C(14)   | -117.82(18) |
| O(3)-C(16)-C(17)-C(18)  | -68.7(3)    |
| O(3)-C(16)-C(17)-C(22)  | 114.1(2)    |
| C(22)-C(17)-C(18)-C(19) | 0.0         |
| C(16)-C(17)-C(18)-C(19) | -177.18(18) |
| C(17)-C(18)-C(19)-C(20) | 0.0         |
| C(18)-C(19)-C(20)-C(21) | 0.0         |
| C(19)-C(20)-C(21)-C(22) | 0.0         |
| C(20)-C(21)-C(22)-C(17) | 0.0         |
| C(18)-C(17)-C(22)-C(21) | 0.0         |
| C(16)-C(17)-C(22)-C(21) | 177.21(18)  |
| O(2)-C(15)-N(1)-C(11)   | 6.0(4)      |
| O(3)-C(15)-N(1)-C(11)   | -174.4(2)   |
| O(2)-C(15)-N(1)-C(12)   | -170.8(3)   |
| O(3)-C(15)-N(1)-C(12)   | 8.8(3)      |
| O(1)-C(11)-N(1)-C(15)   | 0.9(4)      |
| C(9)-C(11)-N(1)-C(15)   | -179.25(19) |
| O(1)-C(11)-N(1)-C(12)   | 178.0(2)    |
| C(9)-C(11)-N(1)-C(12)   | -2.1(2)     |
| C(8)-C(12)-N(1)-C(15)   | 178.4(2)    |
| C(13)-C(12)-N(1)-C(15)  | 61.0(3)     |
| C(14)-C(12)-N(1)-C(15)  | -65.1(3)    |
| C(8)-C(12)-N(1)-C(11)   | 1.4(2)      |
| C(13)-C(12)-N(1)-C(11)  | -116.0(2)   |
| C(14)-C(12)-N(1)-C(11)  | 117.9(2)    |
| O(2)-C(15)-O(3)-C(16)   | -0.3(4)     |



|                        |           |
|------------------------|-----------|
| N(1)-C(15)-O(3)-C(16)  | -179.9(3) |
| C(17)-C(16)-O(3)-C(15) | 179.7(2)  |

---

Symmetry transformations used to generate equivalent atoms:

Table 7. Hydrogen bonds for 1\_a [ $\text{\AA}$  and  $^\circ$ ].

---

| D-H...A | d(D-H) | d(H...A) | d(D...A) | $\angle$ (DHA) |
|---------|--------|----------|----------|----------------|
|---------|--------|----------|----------|----------------|

---
